# Supplementary material for: Transcriptional repression by FACT is linked to regulation of chromatin accessibility at the promoter of ES cells
Source: Life Sci Alliance. 2018 Jun 13;1(3):e201800085. doi: 10.26508/lsa.201800085 (PMC6238418; doi:10.26508/lsa.201800085)
Supplement: Supplementary file 1 [file LSA-2018-00085_TableS1.xlsx]

## Sheet: Ssrp1-KD_differential-expressio
Differential expression gene list (Ssrp1 KD vs Control)
GeneID	Chr	Start	End	Strand	Length	Symbol	type_of_gene	logFC	AveExpr	t	P.Value	adj.P.Val	B
20833	chr2	85037201;85037451;85037794;85038353;85039874;85040265;85040559;85040919;85041108;85041435;85042243;85042693;85042956;85044319;85045410;85045684;85046253;85046646	85037328;85037530;85037969;85038538;85039979;85040455;85040789;85041022;85041236;85041656;85042315;85042831;85043001;85044448;85045580;85045772;85046439;85047111	+	2854	Ssrp1	protein-coding	-3.53089	6.61817	-85.6223	6.13e-23	8.8e-19	42.5339
21667	chr9	110939608;110942329;110942530;110943152;110944191;110945824	110940819;110942438;110942644;110943253;110944243;110946158	-	1927	Tdgf1	protein-coding	3.40462	7.68025	75.2687	4.92e-22	3.52e-18	40.8302
17159	chr8	85083269;85084401;85084641;85085355;85086811;85087172;85088554;85090918;85091084;85091273;85091511;85091838;85092065;85092832;85093919;85094106;85095120;85095326;85095539;85095731;85096271;85096706;85096952;85097402	85083488;85084503;85084814;85085548;85086943;85087317;85088670;85091000;85091204;85091351;85091620;85091945;85092181;85093020;85094016;85094223;85095238;85095427;85095626;85095811;85096498;85096861;85097054;85098739	+	4325	Man2b1	protein-coding	-2.56773	8.32613	-71.5492	1.11e-21	5.13e-18	40.0829
22044	chr6	92242062;92243672;92244548	92243125;92243887;92244648	-	1381	Trh	protein-coding	3.53109	6.63379	70.1702	1.52e-21	5.13e-18	39.6244
228026	chr2	71873272;71875406;71880039;71883423;71883843;71885982;71887382;71888896;71895689;71897647;71899984	71873565;71875547;71880110;71883607;71883932;71886059;71887458;71888994;71895799;71897760;71903858	+	5137	Pdk1	protein-coding	3.9793	6.28242	69.4759	1.79e-21	5.13e-18	39.3599
56421	chr13	6579874;6582403;6584601;6586480;6587052;6588489;6597859;6598739;6600596;6602713;6603079;6603399;6604956;6605636;6614704;6619175;6619520;6620886;6621907;6625136;6635925;6648571	6581592;6582505;6584700;6586591;6587113;6588653;6598011;6598826;6600666;6602859;6603148;6603463;6605081;6605728;6614799;6619283;6619564;6621051;6622096;6625213;6635998;6648724	-	3986	Pfkp	protein-coding	2.63614	7.62228	67.7026	2.72e-21	6.49e-18	39.1902
11520	chr4	86656565;86658581;86660088;86661934;86664429;86668367;86668650;86669945	86657404;86658715;86660269;86662213;86664511;86668562;86668705;86670059	-	1887	Plin2	protein-coding	-2.33058	6.99453	-65.938	4.16e-21	8.52e-18	38.7472
13003	chr13	89655310;89657503;89661917;89678075;89679800;89684400;89685079;89688285;89702918;89709948;89721567;89721772;89725289;89731459;89742073	89657358;89657685;89662061;89678157;89679958;89684513;89685192;89693501;89705797;89712498;89721694;89721946;89725663;89731534;89742512	-	14689	Vcan	protein-coding	-3.6869	6.22664	-63.8328	7.02e-21	1.24e-17	38.098
66395	chr19	8989284;8999662;9000100;9000676;9001699;9037159;9076576	8989429;8999772;9000256;9000863;9019195;9037258;9076919	+	18543	Ahnak	protein-coding	-2.04963	10.6252	-62.7554	9.24e-21	1.32e-17	37.9917
21354	chr17	34187556;34189178;34189430;34190563;34191329;34192837;34193128;34193485;34193881;34194844;34196568	34188405;34189292;34189560;34190768;34191526;34192965;34193316;34193658;34194043;34194980;34197225	+	2950	Tap1	protein-coding	-3.64194	5.64425	-63.43	7.77e-21	1.24e-17	37.8602
64058	chr10	18845071;18853537;18855650	18845406;18853677;18857073	+	1901	Perp	protein-coding	-2.39434	7.07833	-61.9912	1.13e-20	1.47e-17	37.7802
56332	chr9	102717804;102720081;102723569;102724687;102725103;102728317;102729268;102729968;102730793;102731648	102717902;102720876;102723863;102724831;102725195;102728612;102729578;102730176;102730969;102733417	+	4191	Amotl2	protein-coding	-2.3321	8.60398	-61.1616	1.4e-20	1.58e-17	37.5847
105732	chr15	76001092;76004941;76005135;76006101;76009374;76014244	76004749;76005065;76005299;76006562;76009498;76014336	-	4628	Fam83h	protein-coding	-2.53815	6.60104	-61.0634	1.44e-20	1.58e-17	37.516
17246	chr10	117688905;117691145;117692582;117694905;117695953;117696381;117701565;117702202;117705155;117709700;117709946;117710552	117690785;117691222;117692737;117695068;117696049;117696439;117701614;117702335;117705229;117709784;117710028;117710716	-	3027	Mdm2	protein-coding	-2.23152	8.82014	-58.9335	2.54e-20	2.28e-17	36.984
72388	chr16	97741942;97745860;97747293;97748023;97750093;97751494;97755068;97763528	97744244;97746124;97747396;97748181;97750142;97751642;97755359;97763755	-	3550	Ripk4	protein-coding	-2.66752	6.25097	-59.0973	2.43e-20	2.28e-17	36.9743
227753	chr2	35256359;35266744;35282380;35283905;35284674;35290333;35292587;35293478;35294935;35296125;35296366;35298795;35301466;35302491;35303168;35304264;35304581;35306546;35307497	35256473;35266903;35282601;35284109;35284828;35290494;35292736;35293567;35295067;35296213;35296581;35298928;35301556;35302661;35303342;35304388;35304658;35306606;35307902	+	2938	Gsn	protein-coding	-2.25332	6.46559	-57.6276	3.65e-20	3.07e-17	36.6033
12227	chr1	134074865;134078912	134077703;134079155	-	3083	Btg2	protein-coding	-2.04591	7.71312	-57.3177	3.98e-20	3.07e-17	36.5391
22042	chr16	32608896;32613168;32614566;32615193;32616749;32617097;32618218;32618633;32619037;32620366;32621175;32623057;32623372;32624369;32624768;32624984;32626549;32628476;32630094	32609036;32613226;32614767;32615394;32616898;32617199;32618331;32618731;32619176;32620523;32621297;32623142;32623435;32624436;32624826;32625065;32626770;32628616;32632794	+	4914	Tfrc	protein-coding	2.33299	8.31916	57.2393	4.07e-20	3.07e-17	36.5144
23871	chr9	32696042;32728675;32730055;32732949;32733940;32738099;32752799;32754213	32696465;32728794;32730255;32733026;32734188;32738359;32752917;32757820	+	5060	Ets1	protein-coding	-4.75371	4.67734	-60.6693	1.59e-20	1.63e-17	36.3947
13007	chr1	135729197;135739400;135745259;135746720;135750565;135751044	135729274;135739512;135745427;135746849;135750658;135752229	+	1770	Csrp1	protein-coding	-1.96252	7.68191	-56.7536	4.67e-20	3.34e-17	36.3797
20620	chr13	110395044;110396015;110396276;110396591;110396907;110397471;110397688;110397974;110398373;110398679;110399021;110399380;110399763;110400033	110395437;110396122;110396392;110396720;110396994;110397566;110397886;110398121;110398470;110398808;110399261;110399509;110399873;110400844	+	2802	Plk2	protein-coding	-2.40022	7.87787	-56.588	4.89e-20	3.34e-17	36.3321
13368	chr4	153964449;153969093;153969941;153971581;153972780;153974569;153974867	153965613;153969193;153970111;153971660;153972968;153974695;153975081	-	2048	Dffb	protein-coding	-2.66539	5.40118	-54.0254	1.03e-19	6.73e-17	35.4843
109624	chr6	34709444;34741789;34745619;34753443;34755634;34757984;34762110;34762251;34764956;34766103;34771048;34773223	34709697;34741935;34746015;34753588;34755898;34758124;34762153;34762329;34765093;34766198;34771128;34775469	+	4035	Cald1	protein-coding	-1.84052	8.02847	-53.3357	1.27e-19	7.58e-17	35.3698
26362	chr7	25756500;25760751;25761405;25763284;25763943;25764422;25766518;25766793;25770218;25770633;25773099;25773343;25774084;25774515;25778370;25778624;25785834;25786887;25787291;25788415	25759013;25760887;25761564;25763393;25764064;25764514;25766595;25766888;25770309;25770765;25773125;25773493;25774223;25774725;25778485;25778704;25786010;25786987;25787516;25788733	-	5084	Axl	protein-coding	-2.89916	4.8784	-53.3798	1.25e-19	7.58e-17	35.1703
16668	chr15	102028216;102029466;102029823;102030619;102030895;102031296;102031841	102028674;102029548;102029979;102030783;102031020;102031519;102032026	+	1400	Krt18	protein-coding	-1.73261	8.54273	-52.4441	1.67e-19	9.26e-17	35.087
16450	chr12	112908590;112909553;112910444;112911059;112911703;112911909;112912529;112912693;112913165;112913390;112913616;112913936;112914126;112914357;112915198;112915471;112915605;112915880;112916334;112916604;112916809;112920072;112920231;112922000;112928882;112929419	112909385;112909709;112910575;112911307;112911818;112912022;112912614;112912720;112913281;112913503;112913729;112914049;112914278;112914507;112915371;112915517;112915718;112915993;112916447;112916723;112916939;112920132;112920482;112922057;112929232;112929495	-	4054	Jag2	protein-coding	-2.90088	6.14699	-52.4187	1.68e-19	9.26e-17	35.08
16669	chr11	100140810;100141280;100141523;100142052;100142426;100145431	100141167;100141405;100141684;100142208;100142508;100145919	-	1375	Krt19	protein-coding	-1.91228	7.05439	-52.0852	1.86e-19	9.67e-17	34.997
30948	chr18	32377217;32406100;32412421;32412617;32413095;32414183;32414945;32419843;32420069;32421878;32424820;32426224;32429196;32429700;32430750;32431671;32431983;32432324;32435135	32377490;32406180;32412475;32412711;32413190;32414290;32415037;32419928;32420144;32421960;32424967;32426352;32429303;32429723;32430857;32431742;32432093;32432425;32435740	+	2455	Bin1	protein-coding	-3.00568	5.36403	-52.0375	1.89e-19	9.67e-17	34.8822
212647	chr4	139622894;139633715;139633897;139634664;139635389;139636959;139637186;139638375;139640613;139642077;139642514;139643390;139644112;139644979;139648158	139623197;139633808;139633989;139634711;139635544;139637108;139637260;139638562;139640686;139642273;139642561;139643542;139644233;139645097;139649691	+	3355	Aldh4a1	protein-coding	-1.90842	7.027	-51.1888	2.46e-19	1.17e-16	34.7165
223435	chr15	27730649;27733506;27735379;27736447;27740575;27740916;27741252;27742372;27743953;27747921;27749779;27752590;27753712;27754013;27755138;27756466;27758340;27763954;27765719;27767885;27770310;27772910;27773881;27805630;27818064;27818900;27821340;27823981;27825663;27828266;27830143;27830712;27831354;27832014;27832751;27832962;27838781;27841727;27844810;27846710;27847288;27848933;27850993;27851817;278…	27733030;27733644;27735579;27736525;27740696;27741078;27741279;27742510;27744200;27748729;27749956;27752781;27753789;27754063;27755230;27756555;27758409;27764057;27765785;27768033;27770405;27773080;27774173;27805873;27818163;27819042;27821441;27824171;27825774;27828358;27830232;27830781;27831463;27832080;27832866;27833156;27838903;27841842;27844924;27846859;27847479;27849052;27851159;27852012;278…	-	11497	Trio	protein-coding	-2.13613	6.60568	-50.9455	2.66e-19	1.17e-16	34.6428
68794	chr6	29433153;29438464;29440172;29440397;29440638;29440877;29441099;29441434;29442882;29443374;29443660;29444005;29444297;29445008;29445376;29445641;29446051;29446230;29446607;29446808;29447395;29448558;29448834;29449236;29450566;29450814;29451372;29451604;29451997;29452133;29452799;29453199;29453620;29454043;29454262;29455120;29455361;29455784;29456025;29456292;29456737;29457101;29457443;29458777;294…	29433813;29438712;29440269;29440547;29440756;29440954;29441261;29441634;29443019;29443500;29443796;29444198;29444410;29445151;29445499;29445801;29446141;29446399;29446724;29447070;29447992;29448731;29448996;29449396;29450733;29450937;29451528;29451793;29452020;29452380;29452897;29453298;29453760;29454171;29454435;29455281;29455564;29455936;29456147;29456534;29457006;29457238;29457558;29458909;294…	+	9166	Flnc	protein-coding	-3.06259	6.79122	-50.8012	2.78e-19	1.17e-16	34.5969
14230	chr11	100415694;100420400;100420891;100421194;100421644;100421944;100422626;100423085;100423436;100423888	100416025;100420545;100421080;100421339;100421833;100422089;100422818;100423227;100423599;100424840	+	2603	Fkbp10	protein-coding	-2.50833	5.69511	-50.8958	2.7e-19	1.17e-16	34.5966
22271	chr11	9118008;9118507;9119374;9125633;9129488;9131630;9133234;9134722;9135164;9135961	9118284;9118660;9119449;9125698;9129605;9131788;9133348;9134931;9135310;9136170	+	1532	Upp1	protein-coding	2.31586	7.56786	50.7971	2.78e-19	1.17e-16	34.5844
26961	chr15	76904071;76904303;76904539;76904818;76905856;76906121	76904109;76904450;76904680;76905036;76905971;76906318	+	862	Rpl8	protein-coding	1.63133	10.4973	50.9231	2.67e-19	1.17e-16	34.5653
20750	chr5	104435111;104436192;104436541;104436901;104437655;104438226;104439265;104440229	104435248;104436442;104436576;104436903;104437735;104438267;104439546;104441053	+	1658	Spp1	protein-coding	1.83272	7.53309	50.1116	3.46e-19	1.42e-16	34.3619
210126	chr16	24393350;24442781;24448091;24456833;24559592;24608116;24661677;24681746;24721855;24722085;24761593;24845091;24889790;24971831;24977200;24979193	24393604;24442890;24448248;24456942;24559657;24608317;24661789;24681871;24721991;24722136;24762276;24845217;24889959;24972009;24977320;24992578	+	15996	Lpp	protein-coding	-2.10585	6.35421	-49.9172	3.69e-19	1.47e-16	34.3148
75723	chr9	14541966;14548531;14550392;14551622;14555574;14558459;14562075;14571623;14572675;14575151;14592754;14596451;14614734	14547898;14548806;14550621;14551747;14555764;14558608;14562220;14571712;14572819;14575439;14593711;14596600;14615000	-	8951	Amotl1	protein-coding	-1.91992	7.05099	-49.6998	3.95e-19	1.53e-16	34.2378
66991	chr9	73102398;73102830;73103216	73102675;73103009;73104443	+	1686	Khdc3	protein-coding	2.79569	5.67513	49.4544	4.28e-19	1.62e-16	34.1396
16978	chr1	90998727;91053444;91068563;91073324;91076944;91078391;91079031;91084946;91088634;91091602;91093560;91100577;91101185;91103247;91105127;91107298;91108580;91110355;91112156;91114596;91120141;91122422;91123078;91125641;91128086	90998893;91053723;91068649;91073341;91076991;91078435;91079081;91085005;91088711;91091667;91093637;91100612;91101310;91103318;91105297;91107390;91108672;91110447;91112297;91117322;91120190;91122539;91123157;91125745;91128944	+	5743	Lrrfip1	protein-coding	-1.9544	6.40368	-49.2849	4.53e-19	1.64e-16	34.1099
19175	chr11	70525357;70525885;70526294;70526544;70527179;70527437	70525495;70525952;70526425;70526673;70527323;70527858	+	1036	Psmb6	protein-coding	2.07283	7.2029	49.2514	4.58e-19	1.64e-16	34.0877
105501	chr14	54254129;54259232;54261626;54262651;54263169;54265281;54266995;54267768	54254471;54259319;54261714;54263023;54263323;54265392;54267181;54269169	+	2749	Abhd4	protein-coding	-1.84203	6.93804	-49.153	4.72e-19	1.65e-16	34.0599
18484	chr1	97821094;97822936;97825837;97831455;97834408;97837963;97840280;97840699;97842232;97844596;97853103;97864203;97884126;97885602;97894361;97895632;97895969;97897208;97898341;97923094;97924431;97934651;97944620;97975785;97976857;98095485	97821988;97822989;97826037;97831508;97834516;97838078;97840480;97840909;97842304;97844712;97853232;97864520;97884197;97885786;97894464;97895708;97896049;97897275;97898389;97923177;97924516;97934738;97944677;97975905;97977259;98095632	-	4103	Pam	protein-coding	-2.9197	5.35922	-49.0487	4.89e-19	1.67e-16	33.9735
110173	chr3	135485611;135506909;135510975;135511803;135517903;135522992;135524517;135542312;135544726;135547550;135549200;135551063;135554760;135563205;135566488;135567464;135570215	135485857;135507003;135511080;135511973;135518026;135523167;135524627;135542463;135544843;135547636;135549367;135551281;135554924;135563349;135566630;135567721;135571404	+	3675	Manba	protein-coding	2.05314	6.81937	48.8838	5.16e-19	1.72e-16	33.9733
214597	chr9	45937875;45939407;45941301;45941877;45942196;45942393;45942685;45943051;45943578;45944363;45944616;45945144;45945286;45945666;45946745;45946984;45947836;45948215;45949776;45950033;45951760;45951951;45952614;45952749;45953125;45954724	45939316;45939520;45941411;45941982;45942242;45942469;45942793;45943187;45943695;45944486;45944689;45945210;45945359;45945784;45946816;45947055;45947888;45948308;45949841;45950132;45951843;45952052;45952659;45952913;45953246;45955249	-	4221	Sidt2	protein-coding	-2.21087	6.69883	-48.6119	5.65e-19	1.82e-16	33.8862
11745	chr5	96793385;96797401;96811050;96812842;96816341;96820402;96824887;96828348;96828697;96830393;96834775;96838293;96845501	96793563;96797453;96811137;96812936;96816454;96820492;96824966;96828404;96828790;96830488;96834833;96838415;96845968	+	1597	Anxa3	protein-coding	-2.47356	5.473	-48.5589	5.75e-19	1.82e-16	33.8432
71740	chr1	171370173;171380118;171382378;171383637;171384684;171385098;171385663;171386160;171386581	171370743;171380477;171382668;171383757;171384832;171385251;171385738;171386234;171388287	+	3504	Pvrl4	protein-coding	-2.87822	5.22838	-48.5136	5.83e-19	1.82e-16	33.7888
16007	chr3	145646971;145648197;145648533;145649222;145649730	145647968;145648411;145648877;145649435;145649985	-	2028	Cyr61	protein-coding	-1.73881	6.9483	-48.0507	6.8e-19	2e-16	33.6907
20720	chr1	79794321;79796826;79799468;79801456;79802847;79810554;79816728;79821277;79858511	79795042;79796909;79799554;79801556;79803045;79810751;79816955;79821557;79858665	-	2055	Serpine2	protein-coding	-2.39039	5.92973	-47.9259	7.09e-19	2e-16	33.6574
64292	chr2	30889471;30900867;30903090	30892826;30900949;30903297	-	3647	Ptges	protein-coding	-1.94154	6.72281	-47.8743	7.22e-19	2e-16	33.6369
12406	chr7	99345375;99346925;99347266;99348803;99351824;99352882	99346422;99347157;99347364;99349464;99351867;99353239	-	2444	Serpinh1	protein-coding	-1.91456	7.30555	-47.8132	7.37e-19	2e-16	33.6023
17388	chr8	95352337;95365314;95366294;95367928;95368559;95369481;95370133;95370696;95371006;95372105	95353018;95365462;95366422;95368235;95368720;95369734;95370271;95370846;95371121;95374293	+	4279	Mmp15	protein-coding	-3.13121	5.34562	-47.8555	7.26e-19	2e-16	33.5786
13033	chr7	142375916;142376833;142377026;142377333;142380766;142382592;142383418;142385459;142387737	142376738;142376931;142377170;142377455;142380992;142382710;142383541;142385618;142387870	-	1954	Ctsd	protein-coding	-1.40112	9.42095	-47.6883	7.69e-19	2.04e-16	33.5056
21991	chr6	124810592;124811517;124811882;124812404;124812621;124812790;124814008	124811387;124811604;124811967;124812536;124812705;124812913;124814296	-	1601	Tpi1	protein-coding	2.35177	8.26524	47.4567	8.31e-19	2.16e-16	33.456
12740	chr5	134945123	134946934	-	1812	Cldn4	protein-coding	-1.79306	7.34511	-47.3721	8.55e-19	2.16e-16	33.4492
77569	chr5	66745840;66857883;66881899;66953669;66959588;66961157;66968416;66969076;66974410;66993143;66997120;66998647;66998980;67002428;67016465;67017617;67021892;67026072;67027488;67028758;67029702;67030826;67033078;67034166;67044346;67046699;67054236	66746005;66857953;66881968;66953775;66959618;66961267;66968733;66969271;66974662;66993178;66997246;66998804;66999388;67002649;67016555;67017777;67021997;67026112;67027568;67028850;67029806;67030950;67033199;67034289;67044454;67046801;67057159	+	6460	Limch1	protein-coding	-2.55477	5.09508	-47.2263	8.99e-19	2.22e-16	33.3701
71846	chr8	84872111;84872258;84883431;84885935;84887135	84872253;84872832;84883584;84886123;84887446	+	1373	Syce2	protein-coding	2.53715	5.39758	47.0137	9.66e-19	2.34e-16	33.3308
100017	chr4	134745412;134748282;134749337;134749959;134750382;134755193;134757341;134758919;134767816	134747199;134748316;134749467;134750042;134750454;134755307;134757453;134759061;134768004	-	2671	Ldlrap1	protein-coding	-2.00374	6.56154	-46.8793	1.01e-18	2.34e-16	33.2999
56741	chr9	65101495;65113259;65114300;65120218;65121780;65122651;65123776;65124612;65125285;65126758;65128468;65128780;65130563;65131344;65131609;65131926;65133051;65133640;65134473;65135112	65101598;65113612;65114441;65120354;65121920;65122806;65124189;65124776;65125422;65126928;65128704;65128881;65130746;65131471;65131779;65132063;65133156;65133868;65134637;65137943	+	6214	Igdcc4	protein-coding	-2.60861	5.61353	-46.876	1.01e-18	2.34e-16	33.2923
14778	chr11	54902853;54907127;54908541;54909040;54909437	54903052;54907280;54908658;54909139;54910387	+	1523	Gpx3	protein-coding	-3.07819	5.55134	-46.7563	1.06e-18	2.4e-16	33.2372
320202	chr1	180893119;180894135;180894596;180897450	180893433;180894381;180894841;180899103	+	2462	Lefty2	protein-coding	4.44787	4.34933	48.2692	6.33e-19	1.93e-16	33.2185
73844	chr1	161142712;161150965;161155246;161160667;161163267;161164172;161167712	161142840;161151317;161155413;161160761;161163405;161164214;161170507	+	3723	Ankrd45	protein-coding	3.47944	4.09894	47.8102	7.38e-19	2e-16	33.1806
14107	chr8	44950208;44988931;45007242;45009793;45010401;45012964;45017365;45017835;45022804;45027484;45029456;45030112;45031265;45033339;45033832;45035465;45036119;45036676;45038260;45039800;45040534;45041880;45042209;45043923;45045031;45050781	44953481;44989245;45007303;45010125;45010611;45013103;45017640;45018045;45026871;45027680;45029609;45030345;45031654;45033553;45033969;45035608;45036316;45037477;45038391;45039957;45040996;45042033;45042319;45044554;45045168;45052257	+	14627	Fat1	protein-coding	-1.63877	8.96489	-46.7011	1.08e-18	2.41e-16	33.1725
12790	chr1	37219261;37232209;37244833;37253957;37257993;37260697	37219538;37232345;37245012;37254064;37258099;37263384	+	3498	Cnga3	protein-coding	-2.57424	5.07835	-46.5121	1.15e-18	2.53e-16	33.1303
67448	chr2	16356322;16512022;16548117;16565336;16638587;16650109;16660774;16669494;16669823;16703317;16712082;16713670;16729253;16751191	16357237;16512233;16548263;16565405;16638709;16650227;16660873;16669589;16669904;16703383;16712229;16713708;16729413;16752115	+	3205	Plxdc2	protein-coding	-3.25317	4.54189	-46.9245	9.96e-19	2.34e-16	33.1059
51788	chr3	137864599;137865133;137865520;137866011;137866386	137864696;137865210;137865633;137866140;137866922	+	957	H2afz	protein-coding	1.73244	8.14281	46.3621	1.21e-18	2.63e-16	33.0735
67880	chr11	120725373;120725738;120725942;120726088;120726269;120726411;120726999;120727178	120725607;120725855;120726006;120726187;120726311;120726565;120727096;120727281	-	918	Dcxr	protein-coding	-2.12284	5.64185	-46.0432	1.35e-18	2.89e-16	33.0141
107449	chr10	60762595;60766980;60768324;60769108;60772178;60772489;60773744;60774353;60774966;60777185;60777390;60778168;60778784;60779668;60780095;60783058;60831087	60765373;60767161;60768488;60769257;60772411;60772657;60773831;60774742;60775160;60777217;60777554;60778335;60778964;60779771;60780238;60783282;60831581	-	5867	Unc5b	protein-coding	-2.09302	6.14315	-45.9687	1.39e-18	2.91e-16	32.9899
14873	chr19	47854989;47855215;47857859;47859432;47863379;47864297	47855122;47855323;47858081;47859530;47863482;47864790	+	1163	Gsto1	protein-coding	-2.19767	5.87473	-45.9382	1.4e-18	2.91e-16	32.9802
54204	chr7	127214442;127214949;127215281;127215659;127215868;127216690;127216901;127217619;127217971;127218141;127218407	127214844;127215039;127215446;127215755;127215969;127216807;127217035;127217742;127218057;127218231;127218445	-	1453	2017-09-01	protein-coding	2.83651	5.16394	45.834	1.45e-18	2.94e-16	32.9049
69587	chr5	108461332;108472072;108472377;108473789;108475110;108478303;108486140;108487836;108495834;108499627;108500357	108461451;108472111;108472517;108473906;108475206;108478358;108486247;108487924;108495971;108499707;108503099	+	3731	Pcgf3	protein-coding	-1.94224	6.58689	-45.7391	1.5e-18	2.95e-16	32.8993
12349	chr3	14886426;14887834;14895022;14895535;14896700;14897914;14899971	14886786;14888031;14895140;14895627;14896762;14898069;14900770	+	1790	Car2	protein-coding	1.73513	6.97635	45.7581	1.49e-18	2.95e-16	32.8922
22288	chr10	12382188;12385518;12401311;12402883;12405854;12406436;12413936;12415181;12415451;12421597;12436281;12439627;12441936;12448007;12455363;12463286;12465181;12475271;12478413;12481224;12486386;12501378;12525338;12538041;12621191;12633944;12636596;12640927;12643403;12649143;12652711;12654699;12658496;12660779;12663366;12664947;12666699;12667500;12669656;12670120;12671751;12678580;12680472;12682277;126…	12384196;12385540;12401403;12402991;12406094;12406594;12414001;12415246;12415489;12421733;12436392;12439793;12442093;12448092;12455564;12463360;12465242;12475331;12478491;12481370;12486654;12501507;12525494;12538213;12621380;12634098;12636801;12641044;12643611;12649218;12652860;12654834;12658671;12660929;12663538;12665138;12666836;12667658;12669826;12670248;12671930;12678750;12680627;12682450;126…	-	12382	Utrn	protein-coding	-1.71017	8.28258	-45.8397	1.45e-18	2.94e-16	32.8837
234577	chr8	94533028;94548328;94551170;94551740;94553390;94554675;94554930;94555509;94555972;94557420;94558125;94560109;94562738;94563957;94568591;94569971	94533193;94548545;94551349;94551814;94553461;94554758;94555019;94555607;94556058;94557479;94558258;94560163;94562789;94564090;94568827;94570529	+	2302	Cpne2	protein-coding	-2.31118	5.02319	-45.6007	1.58e-18	3.06e-16	32.8252
217684	chr12	80790532;80828026;80851214;80868427;80870075;80874149;80877096	80790815;80828243;80851276;80868624;80870210;80874576;80880833	+	5065	Susd6	protein-coding	-1.73642	7.14113	-45.1739	1.84e-18	3.51e-16	32.6779
20166	chr6	83135808;83137084;83145931;83147489;83147652;83147828;83148106;83149464;83149672;83149972;83150908;83151237;83151886	83136059;83138246;83146130;83147550;83147705;83147945;83148315;83149558;83149778;83150100;83151076;83151341;83152579	+	3358	Rtkn	protein-coding	-2.59684	5.72561	-45.0733	1.9e-18	3.59e-16	32.6728
18616	chr7	6705960;6711851;6712673;6716054;6717113;6717799;6718426;6726490;6730258	6711731;6711943;6712775;6716157;6717196;6717888;6718556;6726574;6730419	-	6624	Peg3	protein-coding	-1.85911	7.22057	-44.7945	2.1e-18	3.86e-16	32.5381
16691	chr15	101996711;101997660;101997853;101998391;101998774;101999431;102000580;102001417;102003898	101997133;101997718;101998073;101998516;101998938;101999526;102000640;102001625;102004342	-	1805	Krt8	protein-coding	-1.54522	9.40415	-44.8109	2.09e-18	3.86e-16	32.4774
19250	chr1	189728268;189786636;189798512;189822589;189825030;189832728;189833318;189836341;189839472;189840462;189843162;189846334;189850024;189854925;189856634;189860458;189863204;189865372;189869927	189728664;189786948;189798681;189822686;189825097;189832798;189833405;189836429;189839559;189840544;189843219;189846412;189851507;189855068;189856852;189860586;189863438;189865535;189876695	+	10746	Ptpn14	protein-coding	-2.10375	7.46955	-44.3307	2.48e-18	4.4e-16	32.3606
14955	chr7	142575532	142578146	-	2615	H19	ncRNA	-1.53151	8.81189	-44.4286	2.4e-18	4.3e-16	32.3526
214897	chr9	65909010;65950016;65958329;65973479;65980903;65999395;66002047;66007740;66010063;66010422;66012747;66019802;66032239;66039577	65909168;65950064;65958721;65973519;65980972;65999546;66002281;66007825;66010147;66010570;66012854;66019912;66032345;66045014	+	7183	Csnk1g1	protein-coding	-1.94824	6.44169	-44.1284	2.67e-18	4.56e-16	32.3207
74249	chr9	110951545;110957800;110960802;110962515;110966441;110970014;110979470;110980827;110981630	110951676;110957946;110961009;110962671;110966577;110970159;110979625;110980963;110984066	+	3657	Lrrc2	protein-coding	3.61354	4.39693	44.65	2.21e-18	4.02e-16	32.2871
80879	chr11	120948484;120949067;120954174;120955226;120955799;120956355;120957855	120948579;120949150;120954268;120955469;120955942;120957122;120959000	+	2577	Slc16a3	protein-coding	3.26619	5.99767	43.9961	2.81e-18	4.73e-16	32.287
69193	chr3	75647441;75648800;75655390	75647938;75648990;75655731	-	1031	Platr10	ncRNA	3.03105	4.72662	44.1529	2.65e-18	4.56e-16	32.2588
75739	chr18	7347962;7353154;7355018;7356142;7379649;7403186;7439569;7440083;7440432;7441553;7442793;7443974;7458932;7461638;7512944;7561726;7626733	7351144;7353297;7355126;7356235;7380069;7403356;7439633;7440279;7440506;7441638;7442874;7444105;7459012;7461715;7513062;7561872;7626863	-	5315	Mpp7	protein-coding	-2.14852	6.19444	-43.9124	2.89e-18	4.82e-16	32.2497
59033	chr15	100761747;100774630;100782946;100783787;100784715;100787164;100788160;100789010;100789835;100790906;100791597;100795763;100796505;100797993;100799647;100800480;100803235;100806250;100807201;100809295;100810594;100811543;100813107;100814450;100815619	100761974;100774711;100783095;100783922;100784875;100787352;100788245;100789167;100789922;100791052;100791697;100795937;100796638;100798238;100799752;100800641;100803348;100806411;100807452;100809363;100810767;100811674;100813198;100814545;100823971	+	11793	Slc4a8	protein-coding	-1.90065	6.61384	-43.8528	2.96e-18	4.87e-16	32.2126
224860	chr17	50509547;50606295;50610992;50640116;50667999;50687712	50509937;50608781;50611195;50640191;50668108;50688494	+	4051	Plcl2	protein-coding	-2.83247	4.3881	-44.1349	2.67e-18	4.56e-16	32.1881
17127	chr9	63646767;63652481;63654686;63655551;63663665;63666148;63667475;63667729;63757472	63650385;63652625;63654823;63655763;63663715;63666222;63667606;63667922;63757994	-	5090	Smad3	protein-coding	-2.21115	5.8034	-43.5116	3.35e-18	5.4e-16	32.1088
18844	chr6	89316313;89320612;89320857;89322443;89322731;89323236;89323574;89324254;89324540;89329384;89329558;89330336;89331215;89331841;89332086;89332681;89333006;89334276;89334651;89334854;89335128;89335397;89337151;89340523;89341849;89342329;89342585;89342951;89343969;89354856;89356458;89362407	89319471;89320762;89321069;89322612;89322921;89323332;89323677;89324413;89324686;89329450;89329814;89330478;89331449;89331984;89332325;89332774;89333173;89334412;89334771;89335005;89335321;89335493;89337351;89340637;89341948;89342482;89342708;89343051;89344109;89355038;89357718;89362613	-	9028	Plxna1	protein-coding	-2.07118	7.95821	-43.5906	3.26e-18	5.3e-16	32.0661
53867	chr9	20770050;20771071;20771587;20772108;20772305;20773085;20773894;20774014;20774316;20774561;20775031;20775233;20775466;20775834;20776092;20776313;20776992;20778477;20778665;20778801;20779016;20779901;20781808;20782487;20782625;20783484;20784669;20785146;20785373;20785573;20786199;20786351;20787090;20787261;20787531;20788551;20792645;20793510;20793711;20793947;20795657;20795810;20795950;20797222;207…	20770978;20771310;20771655;20772220;20772503;20773138;20773929;20774067;20774423;20774614;20775084;20775340;20775519;20775887;20776145;20776366;20777099;20778530;20778718;20778854;20779069;20780008;20781861;20782540;20782732;20783591;20784722;20785235;20785480;20785626;20786252;20786404;20787134;20787314;20787575;20788604;20792698;20793617;20793764;20793991;20795710;20795854;20796003;20797266;207…	-	6086	Col5a3	protein-coding	-2.21049	4.99118	-43.3445	3.57e-18	5.68e-16	32.0289
270685	chr10	3973075;3978634;3980216;3980351;3984084;3985566;3989861;4007742;4015514;4016724;4018426;4028395;4030690;4032232;4033289;4035216;4041773;4047831;4048200;4056750;4083737;4088234;4089295;4089996;4103236;4106377;4148009;4155542;4166481	3973478;3978718;3980266;3980404;3984208;3985666;3989997;4007853;4015605;4016821;4018599;4028531;4030736;4032339;4033363;4035318;4041849;4047971;4048268;4056861;4083876;4088275;4089395;4090173;4103343;4106529;4148126;4156130;4167081	+	4332	Mthfd1l	protein-coding	1.75682	6.33252	43.1308	3.86e-18	6.02e-16	31.9491
320982	chr1	88698225	88702191	-	3967	Arl4c	protein-coding	-2.20498	5.58869	-42.9463	4.13e-18	6.31e-16	31.8998
67776	chr9	38718268;38719258;38722373;38722546;38723027;38723367;38723846;38726943;38727754;38727994;38728622;38733865;38734697;38735559;38735952;38737743;38737903;38738486;38741098;38741694	38718387;38719333;38722430;38722748;38723249;38723542;38723960;38727112;38727842;38728138;38728701;38733979;38734861;38735659;38736205;38737808;38738001;38738616;38741224;38743337	+	4157	Vwa5a	protein-coding	-2.10215	5.8529	-42.8986	4.21e-18	6.35e-16	31.879
21432	chr12	105216753;105218223;105218659;105222533	105217701;105218292;105218829;105222737	-	1395	Tcl1	protein-coding	2.3481	5.22778	42.8116	4.35e-18	6.46e-16	31.8441
16665	chr11	100131759;100132598;100132991;100133389;100133630;100134175;100134450;100135382	100132135;100132623;100133211;100133514;100133791;100134331;100134532;100135949	-	1720	Krt15	protein-coding	-5.91596	3.79749	-47.363	8.58e-19	2.16e-16	31.8323
209683	chr5	110879803;110892832;111085022;111100694;111101970;111177620;111182924;111223110;111225558;111229348;111231050;111233246;111235476;111266535;111271195;111276162;111276784;111278476;111279959;111280675;111281880;111282771;111283945;111284992	110879988;110893110;111085169;111100966;111102100;111177712;111183431;111224451;111226081;111229457;111231179;111233464;111235641;111266675;111271339;111276341;111277504;111278600;111280190;111280751;111281903;111282900;111284052;111289779	+	10780	Ttc28	protein-coding	-3.03637	4.27524	-43.0682	3.95e-18	6.09e-16	31.7682
12492	chr5	92443873;92446304;92448545;92449871;92451347;92454040;92454732;92460042;92460754;92461937;92485197;92505192	92444284;92446462;92448596;92449944;92451465;92454209;92454851;92460133;92460942;92462084;92485354;92505608	-	2110	Scarb2	protein-coding	-1.88768	5.58461	-42.5771	4.75e-18	6.85e-16	31.7606
18612	chr11	101769742;101770969;101771328;101771689;101771881;101773609;101774081;101775318;101777093;101783967;101784230;101784517;101785108	101770590;101771070;101771500;101771757;101771955;101773877;101774245;101775441;101777146;101784014;101784323;101784627;101785310	-	2336	Etv4	protein-coding	1.85286	6.1664	42.5362	4.82e-18	6.85e-16	31.7298
14797	chr10	81559560;81561219;81564095;81564673;81564848;81565292;81565472	81559668;81561316;81564158;81564717;81564910;81565366;81566364	+	1347	Aes	protein-coding	1.84577	6.86255	42.5477	4.8e-18	6.85e-16	31.7071
54387	chr10	76468971;76469949;76471423;76476514;76476783;76477720;76481001;76482624;76483115;76484654;76488342;76489335;76489868;76490728;76492861;76493430;76496408;76499456;76501062;76501210;76502652;76504163;76504630;76506298;76507290;76508298;76511020;76512418;76515582	76469214;76471252;76471649;76476592;76476924;76477910;76481140;76482821;76483383;76484816;76488502;76489576;76490067;76490828;76492992;76493543;76496560;76499653;76501130;76501344;76502805;76504421;76504727;76506688;76507547;76508427;76511223;76512568;76515857	+	6383	Mcm3ap	protein-coding	-1.31637	9.07177	-42.7394	4.47e-18	6.54e-16	31.7026
383491	chr1	13113428;13115780;13118763;13122361;13124363;13124619;13125166;13127110	13114487;13115881;13118965;13122631;13124520;13124672;13125856;13127163	-	2593	Prdm14	protein-coding	2.78516	4.44124	42.4617	4.96e-18	6.97e-16	31.625
229317	chr3	58525821;58531087;58537534;58539528;58541040;58541634;58544995;58545228;58545500;58548393;58552569;58555535;58556573;58557121	58526086;58531156;58537608;58539646;58541139;58541716;58545068;58545372;58545616;58548964;58552682;58555651;58556638;58557501	+	2299	Eif2a	protein-coding	1.78536	6.76316	42.2227	5.43e-18	7.49e-16	31.585
79196	chr7	143688762;143691888;143692858;143693772;143694198;143694809;143695040;143695515;143699234;143700714;143701192;143702690;143703151;143704510;143704969;143707346;143709008;143709539;143709773;143713496;143715666;143740270;143741673	143689957;143691990;143692984;143693898;143694383;143694945;143695129;143695612;143699332;143700810;143701290;143702771;143703335;143704702;143705140;143707430;143709211;143709640;143709853;143713578;143715822;143740360;143741963	-	4085	Osbpl5	protein-coding	-3.88659	3.93265	-43.1735	3.8e-18	5.99e-16	31.5171
20266	chr7	31116524;31117224;31117706;31122906;31125055;31126666	31117136;31117295;31117847;31123146;31125221;31126945	-	1515	Scn1b	protein-coding	-3.32524	4.93961	-42.0112	5.89e-18	7.91e-16	31.4965
14175	chr7	144861386;144862232;144862765	144861832;144862335;144865243	+	3030	Fgf4	protein-coding	1.61198	7.06249	42.0041	5.9e-18	7.91e-16	31.4854
242939	chr5	35502218;35503652;35506672;35508118;35511023;35511703;35512411;35515351;35517393;35519081;35525433	35502681;35503751;35506811;35508253;35511181;35511864;35512607;35515563;35517767;35519113;35525626	-	2173	Cpz	protein-coding	-3.98001	4.11287	-42.7997	4.37e-18	6.46e-16	31.4625
12826	chr8	11198423;11201658;11202894;11206226;11207194;11208233;11209522;11210760;11211764;11212602;11213504;11214652;11216701;11217265;11217434;11217913;11218681;11218869;11219080;11219987;11220209;11220982;11221289;11222196;11222999;11223576;11226325;11226950;11231398;11231947;11233828;11235095;11236052;11236426;11237845;11238998;11239134;11239827;11240041;11241122;11242173;11242782;11244341;11244486;112…	11199882;11201830;11203008;11206403;11207406;11208331;11209650;11210831;11211836;11212735;11213689;11214702;11216799;11217345;11217560;11218052;11218770;11218967;11219232;11220076;11220376;11221095;11221439;11222293;11223103;11223668;11226493;11227141;11231468;11232030;11233923;11235259;11236087;11236510;11237886;11239051;11239178;11239877;11240067;11241208;11242214;11242817;11244403;11244569;112…	-	6615	Col4a1	protein-coding	-1.67195	8.66932	-42.0571	5.78e-18	7.9e-16	31.4499
67968	chr9	78376903;78377975;78378354	78377691;78378157;78378588	-	1207	Ooep	protein-coding	2.37371	5.54139	41.7378	6.54e-18	8.51e-16	31.4419
13649	chr11	16752203;16858896;16860068;16862946;16867231;16868108;16869219;16870976;16871583;16871802;16872846;16874960;16878127;16881464;16883456;16887141;16889913;16891178;16893008;16896894;16904305;16905348;16906736;16908877;16909732;16910208;16910794;16911494	16752570;16859047;16860251;16863080;16867299;16868226;16869360;16871092;16871709;16871875;16872936;16875159;16878259;16881554;16883613;16887658;16890054;16891300;16893106;16897079;16904460;16905423;16906882;16908974;16909899;16910255;16910896;16913907	+	6438	Egfr	protein-coding	-2.41503	5.0925	-41.7166	6.59e-18	8.51e-16	31.4259
71780	chr8	70594481;70594620;70594823;70595139;70595361;70595705;70595950;70596248;70596496;70596694;70596997	70594543;70594748;70594984;70595271;70595554;70595854;70596165;70596412;70596609;70596911;70597290	+	1838	Isyna1	protein-coding	2.06353	7.25055	41.7475	6.51e-18	8.51e-16	31.3811
212933	chr1	131797395;131798596;131801094;131801726;131802301;131802720;131804052;131804587;131804893;131806899;131812035;131813891;131815987	131797586;131798682;131801326;131801812;131802434;131802839;131804127;131804648;131804971;131806970;131812203;131813990;131818115	+	3540	Pm20d1	protein-coding	-2.33052	5.16368	-41.5875	6.93e-18	8.87e-16	31.3801
66212	chr4	47474661;47474912;47480131;47482975	47474753;47475009;47480232;47483233	+	552	Sec61b	protein-coding	2.20755	5.71959	41.5425	7.05e-18	8.87e-16	31.3631
80287	chr15	79892408;79895411;79897695;79898111;79899020;79905444;79906341;79906851;79907304	79892569;79895558;79897971;79898225;79899118;79905600;79906602;79906963;79908429	+	2459	Apobec3	protein-coding	1.80464	6.23802	41.547	7.04e-18	8.87e-16	31.3435
235505	chr9	78615546;78616877;78634647;78636449;78641979;78654560;78657445;78660263;78660892;78661653;78664203;78665444;78665636;78667239;78669703;78671911;78672552;78680021;78680803;78684835;78688730;78689709;78691189;78695820;78698083;78700195;78703036;78703653;78705038;78707444;78710133;78712537;78714892	78615952;78617049;78634675;78636679;78642104;78654599;78657529;78660359;78661051;78661762;78664418;78665545;78665698;78667415;78669855;78671985;78672612;78680162;78680920;78684948;78688948;78689853;78691365;78695901;78698311;78700360;78703223;78703808;78705103;78707583;78710280;78712639;78716260	+	5867	Cd109	protein-coding	-2.46848	5.29623	-41.3827	7.5e-18	9.35e-16	31.3035
239435	chr15	52040107;52044799	52040530;52045722	+	1348	Aard	protein-coding	1.99827	5.78599	41.2768	7.81e-18	9.66e-16	31.256
671535	chr15	76232995;76233698;76240049;76240287;76241156;76241326;76241658;76242403;76242732;76243064	76233606;76233872;76240182;76240931;76241228;76241547;76242322;76242639;76242986;76243440	-	3395	Parp10	protein-coding	-2.16662	5.48954	-41.1362	8.25e-18	1e-15	31.2089
216049	chr10	67886105;67889953;67897434;67909201;67912371	67889091;67889990;67897614;67909959;67912662	-	4257	Zfp365	protein-coding	-2.00774	6.61252	-41.1863	8.09e-18	9.92e-16	31.1892
100041194	chr12	112772193	112775764	-	3572	Ahnak2	protein-coding	-4.06091	3.90315	-42.2622	5.35e-18	7.45e-16	31.1563
68420	chr5	114775140;114785941;114786685;114789308;114791264;114792100;114795681;114796834;114797853;114798521;114799384;114800705;114801656;114803557;114804229	114775324;114786073;114786809;114789353;114791407;114792289;114795747;114796915;114797914;114798651;114799541;114800812;114801816;114803624;114805821	+	3253	Ankrd13a	protein-coding	-1.57163	7.66524	-41.0118	8.66e-18	1.04e-15	31.0679
54610	chr1	39371495;39373727;39374082;39376424;39376878;39379455;39379995;39380228;39381277;39385121;39385998;39389308;39391117;39392057;39394065;39402683;39405291;39406752;39426068;39478440	39372786;39373824;39374171;39376489;39377118;39379523;39380093;39380357;39381562;39385238;39386212;39389458;39391287;39392254;39394272;39402923;39405519;39406870;39426178;39478747	-	4440	Tbc1d8	protein-coding	-1.58143	6.34667	-40.6214	1.01e-17	1.2e-15	30.9696
17907	chr7	127211608;127212861;127213165;127213418;127213610;127213935;127214091	127211763;127212953;127213240;127213522;127213688;127213983;127214287	+	755	Mylpf	protein-coding	2.41079	6.25731	40.558	1.04e-17	1.21e-15	30.9581
71461	chr17	46564451;46566103;46567925;46571603;46572522;46573420;46574272;46576264;46576492;46576761;46579050;46579293;46579567;46586201;46586714;46590012;46590261;46590759;46591515;46629268	46565495;46566281;46568076;46571683;46572754;46573575;46574475;46576391;46576642;46576910;46579169;46579428;46579700;46586467;46586862;46590162;46590451;46590861;46591802;46629504	-	4255	Ptk7	protein-coding	-1.6263	8.00441	-40.6217	1.01e-17	1.2e-15	30.8975
100910	chr5	24586750;24589097;24590309;24591069	24588300;24589661;24590491;24592487	+	3718	Chpf2	protein-coding	-2.97479	4.24443	-40.5558	1.04e-17	1.21e-15	30.8597
59091	chr2	163336242;163338605;163339233;163341462;163375604;163397148	163337924;163338699;163339972;163341580;163376375;163397993	-	4255	Jph2	protein-coding	-4.31872	3.71123	-41.7876	6.41e-18	8.51e-16	30.8109
22401	chr3	32334792;32343334;32343552;32345458;32360890;32365504	32341695;32343434;32343718;32345580;32361216;32365665	-	7784	Zmat3	protein-coding	-1.59325	6.58235	-40.2397	1.17e-17	1.36e-15	30.8039
83395	chr11	97013569;97021406	97013610;97024738	+	3375	Sp6	protein-coding	-2.47458	4.3927	-40.1867	1.2e-17	1.38e-15	30.7793
320595	chrX	151520672;151522388;151547395;151547815;151550831;151552486;151554134;151555973;151565372;151565959;151567652;151570342;151572366;151573413;151597301;151597900;151598503;151599274;151620864;151625192;151630150;151631339	151521437;151522576;151547480;151547923;151550991;151552627;151554320;151556135;151565459;151566065;151567743;151570431;151572668;151573516;151597479;151597985;151598636;151599584;151620959;151625833;151630486;151633857	+	6891	Phf8	protein-coding	-1.82479	5.86297	-39.9544	1.32e-17	1.48e-15	30.7245
78388	chr7	126986860;126987477;126988318;126988826;126989546;126992275;126992554;126993520;126995736;126996238;126998226;126998473;127001480;127001809;127014519	126987114;126987665;126988444;126988942;126989932;126992472;126992798;126993801;126995972;126996332;126998357;126998596;127001675;127001958;127014594	-	2810	Mvp	protein-coding	-1.47646	7.56976	-40.1129	1.24e-17	1.4e-15	30.7052
18655	chrX	106187124;106192007;106194356;106194632;106196843;106197842;106199647;106200157;106202439;106202837;106203239	106187315;106192057;106194511;106194776;106196946;106197961;106199761;106200336;106202616;106202935;106203699	+	1801	Pgk1	protein-coding	1.73617	8.3765	40.1595	1.21e-17	1.38e-15	30.6948
15586	chr9	107576952;107577553;107578881;107579100	107577078;107578476;107578970;107580137	+	2179	Hyal1	protein-coding	-2.80128	5.04504	-39.8126	1.39e-17	1.53e-15	30.6782
338372	chr12	81714950;81724064;81725722;81728406;81730537;81731992;81734080;81735070;81743798;81772680;81780490	81722523;81724876;81725834;81729836;81730659;81732232;81734255;81735218;81743978;81773093;81781170	-	11896	Map3k9	protein-coding	-1.87416	5.99523	-39.8422	1.38e-17	1.52e-15	30.6737
231070	chr5	28071412;28073547;28074482;28075062;28076791	28071795;28073671;28074648;28075161;28078662	+	2648	Insig1	protein-coding	1.93522	5.99878	39.8339	1.38e-17	1.52e-15	30.6692
17164	chr1	131053704;131055759;131055929;131056414;131056889;131057494;131058001;131058352;131058623;131097289	131055235;131055839;131056014;131056538;131056964;131057620;131058080;131058416;131058762;131097543	-	2567	Mapkapk2	protein-coding	-1.67536	6.14462	-39.7453	1.43e-17	1.55e-15	30.6242
231712	chr5	121371725;121372603;121373138;121373947;121375016;121375796;121377738;121378496;121379416;121379546;121384040;121385525	121372412;121372675;121373474;121374067;121375246;121375872;121377944;121378901;121379469;121379681;121384104;121385615	-	2486	Trafd1	protein-coding	-2.27557	6.0372	-39.5738	1.54e-17	1.61e-15	30.5677
76582	chr13	106794439;106812208;106822956;106842089;106847346;106848241;106856738;106857229;106860861;106865865;106870675;106875491;106876239;106876935;106879613;106882842;106883526;106886667;106889363;106891616;106892423;106895805;106897216;106898919;106900685;106910200;106910744;106919524;106925013;106936760	106795795;106812292;106823051;106842210;106847459;106848336;106856818;106857308;106860937;106865980;106870788;106875607;106876279;106876968;106879739;106882947;106883573;106886757;106889406;106891768;106892615;106895875;106897264;106898977;106900817;106910403;106910816;106919624;106925156;106936915	-	4282	Ipo11	protein-coding	1.50479	7.1343	39.7316	1.44e-17	1.55e-15	30.5658
24066	chr18	38586265;38601170	38590755;38601268	-	4590	Spry4	protein-coding	2.17392	5.33651	39.4506	1.61e-17	1.65e-15	30.5376
226970	chr1	34801722;34804914;34805956;34806315;34807059;34807642;34809697;34810311;34811086;34811678	34802001;34805093;34806135;34806494;34807291;34807771;34809828;34810554;34811163;34812754	+	2714	Arhgef4	protein-coding	-2.3607	4.90829	-39.429	1.63e-17	1.65e-15	30.5255
27280	chr1	135766085;135768478	135766894;135769134	+	1467	Phlda3	protein-coding	-1.73315	7.16605	-39.6001	1.52e-17	1.6e-15	30.5134
12466	chr5	129787385;129788234;129789053;129789817;129790584;129791470;129791783;129792020;129793636;129794352;129844962;129845583;129845748	129787575;129788297;129789187;129789990;129790687;129791580;129791942;129792102;129793732;129794500;129845072;129845655;129846355	+	2060	Cct6a	protein-coding	1.37211	8.58718	39.723	1.45e-17	1.55e-15	30.5052
16004	chr17	12682406;12685138;12685591;12686622;12688316;12688990;12690132;12691157;12691883;12692639;12693074;12694003;12695286;12697325;12698086;12698525;12699180;12700342;12701220;12701933;12702197;12703361;12704272;12704633;12704897;12705688;12709379;12710637;12712019;12713961;12714873;12715378;12715873;12716569;12717273;12718652;12719813;12722128;12725315;12726190;12726671;12731408;12733797;12735967;127…	12684126;12685207;12685734;12686808;12688503;12689136;12690246;12691293;12692117;12692785;12693281;12694164;12695435;12697543;12698342;12698644;12699306;12700532;12701356;12702030;12702327;12703576;12704359;12704808;12705040;12705852;12709574;12710741;12712120;12714140;12715041;12715493;12716047;12716716;12717410;12718795;12719950;12722292;12725418;12726355;12726833;12731513;12733926;12736099;127…	-	8929	Igf2r	protein-coding	-1.47972	8.14196	-39.639	1.5e-17	1.59e-15	30.4867
238217	chr12	66283379	66284401	-	1023	Rpl10l	protein-coding	-1.89093	5.66765	-39.3475	1.68e-17	1.67e-15	30.4845
83997	chr14	26413175;26416203;26418113;26422421;26426565;26427235;26428242;26429788;26438679;26438948;26442575;26459410;26459904;26460042;26462261;26463576;26465201;26465568;26468483;26470364;26473899;26482819;26533328	26414988;26416292;26418247;26422592;26426682;26427555;26428316;26429910;26438738;26439028;26442634;26459460;26459954;26460210;26462398;26463716;26465272;26465663;26468545;26470400;26473971;26482966;26533740	-	4501	Slmap	protein-coding	-1.45801	7.00036	-39.4791	1.6e-17	1.65e-15	30.468
170833	chr8	84990595;84991219;84991377;84993184;84993324;84993575;84993988;84994461;84994622;84994876;84995736;84996955;84997164;84997379;84998000;84998204;84998490;85001155;85001321;85002504;85002687;85002865	84990752;84991304;84991449;84993234;84993456;84993642;84994050;84994541;84994782;84995016;84995937;84997065;84997251;84997448;84998137;84998291;84998524;85001237;85001424;85002614;85002758;85003364	+	2617	Hook2	protein-coding	1.70874	5.75504	39.3231	1.7e-17	1.67e-15	30.4672
15235	chr9	108080436;108081145;108081385;108081584;108081783;108082001;108082203;108082465;108082820;108083029;108083254;108083479;108083594;108083864;108084061;108084288;108084493;108084774	108080530;108081292;108081497;108081698;108081919;108082121;108082321;108082660;108082950;108083131;108083390;108083514;108083702;108083941;108084207;108084394;108084632;108085027	+	2286	Mst1	protein-coding	-2.87033	5.25171	-39.2714	1.74e-17	1.69e-15	30.4655
15259	chr2	104426481;104430727;104431152;104433168;104433555;104434338;104434590;104434936;104436997;104437851;104439230;104440206;104441245;104446512;104470749;104493948	104430331;104430854;104431387;104433308;104433845;104434499;104434717;104435057;104437120;104438007;104439414;104440292;104441364;104446635;104471847;104494489	-	7497	Hipk3	protein-coding	-2.03773	6.16937	-39.325	1.7e-17	1.67e-15	30.4548
225912	chr19	10577723;10578982;10580463;10582298;10585182;10586691;10587822;10588525	10578083;10579074;10580562;10582496;10585390;10586845;10587978;10589830	+	2580	Cyb561a3	protein-coding	-2.1882	4.82942	-39.2433	1.76e-17	1.7e-15	30.4499
11910	chr1	191170296;191172375;191177231;191183093	191171679;191172482;191177474;191183333	-	1977	Atf3	protein-coding	-3.54685	4.48645	-39.4436	1.62e-17	1.65e-15	30.4377
236539	chr3	98313171;98314168;98315065;98316406;98319620;98320646;98321213;98328047;98328289;98333235;98334507;98339695	98313457;98314405;98315195;98316538;98319772;98320794;98321345;98328145;98328343;98333300;98334658;98339969	-	1871	Phgdh	protein-coding	1.52339	6.58223	39.3165	1.7e-17	1.67e-15	30.4203
69327	chr2	28462001;28465137;28466034	28462434;28465215;28466324	-	804	1700007K13Rik	protein-coding	-2.15948	5.51693	-39.1249	1.84e-17	1.77e-15	30.4007
212632	chr4	139530548;139531691;139532281;139536523;139574720;139603213;139604999;139606422;139607605;139613794;139614026;139614931;139616328	139530655;139531860;139532390;139536632;139575597;139603273;139605094;139606562;139607744;139613914;139614118;139615061;139620382	+	6214	Iffo2	protein-coding	-2.15432	4.76947	-39.0998	1.86e-17	1.78e-15	30.39
12977	chr3	107741048;107745595;107746726;107747107;107748154;107750311;107753732;107755431;107756617;107760025	107743145;107745840;107746784;107747159;107749169;107750458;107753902;107755493;107756739;107760469	-	4422	Csf1	protein-coding	-3.61686	4.30155	-39.4239	1.63e-17	1.65e-15	30.3789
11989	chrX	101079221;101079700;101080101;101080708;101081696;101081893;101082191;101082534;101082791;101083148;101083871;101084821;101085272	101079592;101079808;101080267;101080871;101081798;101082032;101082413;101082646;101082968;101083306;101084274;101084978;101085352	-	2371	Slc7a3	protein-coding	2.32431	5.6033	39.0672	1.89e-17	1.78e-15	30.3746
109246	chr6	127961400;127965238;127965699;127966382;127966729;127967081;128034166;128083382;128143514	127964499;127965321;127965830;127966483;127966803;127967272;128034245;128083481;128143578	-	3930	Tspan9	protein-coding	-1.53727	6.6278	-39.0433	1.91e-17	1.79e-15	30.3054
67071	chrX	111388192;111391087;111398581;111400208;111404678;111407456;111408645;111409333;111409850;111410535;111412705;111413538;111413838;111417098;111420912;111421670;111432614;111434317;111435187;111439153;111446231;111450292;111462850;111486669;111537821	111389911;111391218;111398698;111400284;111404839;111407614;111408734;111409455;111409980;111410637;111412763;111413626;111413908;111417240;111420949;111421776;111432693;111434397;111435268;111439269;111446290;111450354;111463101;111486800;111537945	-	4314	Rps6ka6	protein-coding	2.31633	6.02225	38.9282	2e-17	1.83e-15	30.2991
66249	chr11	17203198;17204501;17208789;17209077;17209311;17210988;17211313	17204001;17204571;17208906;17209137;17209394;17211137;17211589	-	1565	Pno1	protein-coding	1.75781	5.8937	38.9218	2e-17	1.83e-15	30.2943
66480	chr14	18267823;18269907;18270279;18270959	18269316;18270043;18270460;18270986	-	1841	Rpl15	protein-coding	1.36935	7.61382	39.0889	1.87e-17	1.78e-15	30.2746
14245	chr12	16535669;16540914;16541714;16544644;16546721;16547486;16548877;16553949;16558409;16560982;16562363;16563622;16564526;16565391;16568390;16571164;16573660;16576948;16579882;16580704;16584508;16589718	16538572;16541017;16541828;16544796;16546807;16547634;16549003;16554028;16558501;16561051;16562456;16563812;16564619;16565697;16568519;16571262;16573785;16577255;16579977;16580904;16584651;16589770	-	5725	Lpin1	protein-coding	-1.55333	6.66366	-38.965	1.97e-17	1.82e-15	30.2707
266692	chr2	156071841;156073799;156074176;156076237;156077399;156077556;156077775;156077929;156078147;156078332;156078574;156078752;156078900;156079063;156079339;156103349;156111786	156073661;156074035;156074309;156076288;156077453;156077689;156077834;156078015;156078233;156078421;156078654;156078823;156078974;156079242;156079464;156103397;156111965	-	3520	Cpne1	protein-coding	-1.4233	6.52351	-38.8953	2.03e-17	1.84e-15	30.2469
107029	chr18	73770040;73773130;73775379;73781042;73785695;73788354;73791084;73791609;73791801;73794446;73794781;73796314;73797829;73801729;73805052;73815304	73770808;73773228;73775449;73781144;73785837;73788468;73791197;73791706;73791910;73794549;73794942;73796389;73797978;73801862;73805169;73815392	-	2455	Me2	protein-coding	1.71386	6.34054	38.7801	2.12e-17	1.92e-15	30.2105
232288	chr6	97286867;97292363;97295576;97298035;97300209;97302289;97305147;97306479;97306679;97308027;97308614;97310663;97323655;97325433;97328233;97329481;97353182;97354005;97396193;97412488;97421562;97423459;97528730;97617190	97288480;97292495;97296387;97298154;97300356;97302345;97305375;97306598;97306812;97308168;97308752;97310739;97323741;97325490;97328298;97329564;97353204;97354061;97396277;97412580;97421656;97423524;97528851;97617657	-	5029	Frmd4b	protein-coding	-2.24975	4.57763	-38.6598	2.23e-17	1.98e-15	30.2001
233335	chr7	67730161;67739105;67751804;67758819	67736906;67739175;67751928;67759742	-	7866	Synm	protein-coding	-2.73572	4.89129	-38.6108	2.28e-17	2e-15	30.1877
78070	chr7	44959372;44959844;44960050;44960758;44961519;44962146;44962743;44963904;44965084;44965371;44966626;44966797;44967058;44970405;44970618;44971236;44973010;44973727;44974595	44959675;44959936;44960163;44960910;44961650;44962310;44962859;44964009;44965266;44965566;44966710;44966904;44967132;44970542;44970719;44971407;44973149;44973880;44974851	-	2794	Cpt1c	protein-coding	-1.6442	6.83372	-38.7131	2.18e-17	1.95e-15	30.1562
245469	chrX	73793357;73796101;73796376;73796830;73798194;73798758;73799834;73824282	73795920;73796211;73796477;73796892;73798292;73798848;73800087;73824969	-	3972	Pdzd4	protein-coding	1.77482	5.45746	38.5091	2.38e-17	2.08e-15	30.1409
12235	chr2	127800200;127803018;127804182;127804474;127804809;127805280;127806226;127807809;127808967;127810609;127812948;127813829;127814638;127814839;127816089;127817252;127819213;127821675;127821942;127823959;127825107;127827301;127829438;127829678;127831720	127801438;127803124;127804350;127804631;127804970;127805395;127806369;127808011;127809054;127810783;127813029;127813925;127814748;127814967;127816147;127817478;127819364;127821859;127821994;127824059;127825150;127827497;127829576;127829737;127831859	-	4337	Bub1	protein-coding	1.44299	7.47428	38.7326	2.17e-17	1.94e-15	30.1296
269615	chr4	154983115;154985366;154986215;154989118;154989420;154989730;154989893;154990689;154991015;154991285;154992533;154992925;154996132;154998453;154998851;155000065;155000448;155000804;155002755;155006602;155006919;155008991;155010639	154984965;154985392;154987016;154989197;154989566;154989814;154990017;154990796;154991197;154991382;154992615;154993023;154996290;154998560;154999022;155000185;155000651;155000897;155002925;155006732;155007161;155009137;155010984	-	5584	Plch2	protein-coding	-3.06155	3.76061	-38.9689	1.97e-17	1.82e-15	30.1111
17762	chr11	104231436;104282368;104287123;104289908;104294859;104302361;104306626;104310269;104318157;104321351;104322428;104327972	104231607;104282480;104287209;104289994;104294924;104302410;104306758;104310534;104318249;104321432;104322540;104332096	+	5387	Mapt	protein-coding	2.34256	4.71923	38.3809	2.51e-17	2.17e-15	30.0934
235086	chr9	27299228;27309404;27311567;27317355;27317809;27319206;27319524;27322173;27322617;27322844;27323209;27324177;27326846;27328480;27329539;27331651;27332502;27333078	27299517;27309601;27311713;27317506;27317926;27319347;27319669;27322315;27322757;27322960;27323359;27324288;27327021;27328706;27330135;27331812;27332547;27334763	+	4751	Igsf9b	protein-coding	-2.17969	5.54569	-38.2438	2.66e-17	2.25e-15	30.0318
70097	chr10	8722219;8727858;8729328;8733596;8739321;8740174;8741428;8742428;8744488;8746116;8751139;8756629;8780519;8784198;8786348;8789561;8814241;8814407;8850363;8885724	8725760;8727989;8730436;8733709;8739471;8740383;8741597;8742563;8744631;8746190;8751485;8756761;8780620;8784310;8786434;8789601;8814290;8814457;8850491;8886070	-	7183	Sash1	protein-coding	-1.86607	6.51295	-38.3281	2.56e-17	2.19e-15	30.0131
244152	chr7	98350668;98353477;98359358;98361242	98353130;98353616;98359467;98361328	-	2800	Tsku	protein-coding	-2.48783	4.43786	-38.1986	2.71e-17	2.27e-15	29.9943
269589	chr4	133253090;133253455;133255533;133255734;133256042;133256488;133256865;133257136;133257417;133257734;133258861;133258982;133259288;133260853;133262987	133253308;133253660;133255632;133255812;133256200;133256584;133257031;133257249;133257511;133257821;133258906;133259057;133259436;133261081;133263087	-	1925	Sytl1	protein-coding	-3.17235	4.24511	-38.3401	2.55e-17	2.19e-15	29.9875
17996	chr2	52136647;52147140;52147637;52148761;52149094;52149590;52150537;52150967;52151364;52153056;52157291;52157832;52159477;52160656;52161371;52162068;52162905;52163937;52164592;52165167;52167560;52169059;52169843;52170439;52175079;52175289;52175607;52176586;52176787;52177522;52177969;52179462;52183273;52183732;52186012;52187411;52188683;52189599;52189854;52191926;52192470;52193170;52193876;52194380;521…	52137431;52147246;52147789;52148853;52149277;52149697;52150629;52151059;52151456;52153148;52157383;52157924;52159569;52160748;52161475;52162172;52163009;52164050;52164702;52165277;52167664;52169163;52169947;52170549;52175183;52175390;52175717;52176696;52176891;52177626;52178073;52179566;52183380;52183836;52186116;52187515;52188787;52189703;52189958;52192030;52192574;52193274;52193986;52194478;521…	-	22489	Neb	protein-coding	-1.95123	5.52527	-38.0703	2.86e-17	2.37e-15	29.956
20238	chr13	45549755;45566549;45697821;45735115;45795509;45852328;45956455;45964815	45557585;45568580;45697945;45735178;45795637;45852456;45956575;45964991	-	10608	Atxn1	protein-coding	-2.53675	4.60223	-38.0446	2.89e-17	2.37e-15	29.943
14109	chr19	6057888;6058428;6059144;6059349	6058325;6058572;6059199;6059524	+	815	Fau	protein-coding	1.90414	7.17838	38.2218	2.68e-17	2.26e-15	29.9289
93897	chr5	128601106	128604093	+	2988	Fzd10	protein-coding	-1.81213	5.77347	-38.0172	2.92e-17	2.38e-15	29.9199
653016	chr17	45600967;45601783;45601979	45601685;45601915;45602102	-	976	Gm7325	protein-coding	2.50466	4.56199	37.9401	3.02e-17	2.4e-15	29.9005
212285	chr5	62602445;62606075;62611704;62613994;62615004;62621839;62630133;62635952;62638962;62641328;62642795;62646183;62649689;62654046;62668789;62669027;62669880;62670936;62675952;62676512;62677102;62677945;62683355;62685561;62698241;62706608;62714733;62730521;62732970;62733900;62734988;62748776;62765894	62604656;62606209;62611767;62614029;62615086;62621966;62630261;62636069;62639036;62641396;62642942;62646288;62649901;62654209;62668852;62669225;62669982;62671080;62676086;62676686;62677284;62678030;62683554;62685676;62698419;62706728;62714802;62730874;62733061;62733976;62735046;62749816;62766177	-	7363	Arap2	protein-coding	-1.79389	6.1296	-38.0026	2.94e-17	2.38e-15	29.8938
73569	chr16	65815633;65827894;65839209;65860670	65815758;65828176;65839733;65863066	+	3331	Vgll3	protein-coding	-2.62334	4.09068	-38.0537	2.88e-17	2.37e-15	29.8823
59290	chr1	166130460;166146639;166152568;166157513;166163773;166164580;166165147	166130604;166146793;166152784;166157668;166163892;166164715;166166510	+	2293	Gpa33	protein-coding	2.29084	4.91811	37.7811	3.23e-17	2.56e-15	29.8473
237500	chr10	100443902;100448184;100450239;100451382;100457048;100458915;100460960;100466021;100471329;100471915;100474375;100476557;100477805;100487162	100447743;100449050;100450408;100451485;100457159;100459035;100461108;100466273;100471501;100472030;100474474;100476775;100478022;100487347	-	6630	Tmtc3	protein-coding	-1.40469	6.77458	-37.9849	2.96e-17	2.38e-15	29.8434
69601	chr2	35558458;35621981;35643888;35661492;35691994;35707648;35708814;35709818;35712866;35713106;35715269;35717071;35718760;35719853;35721261;35723029;35727426;35728058	35558612;35622283;35643991;35661625;35692410;35707801;35708912;35710372;35713010;35713250;35715505;35717272;35718938;35720741;35721413;35723222;35727513;35730994	+	7090	Dab2ip	protein-coding	-1.79025	6.957	-37.9756	2.97e-17	2.38e-15	29.8348
13590	chr1	180935039;180936547;180937009;180937612	180935359;180936793;180937254;180938401	+	1604	Lefty1	protein-coding	4.02732	3.9156	38.4108	2.48e-17	2.15e-15	29.8231
26912	chr15	79030874;79033931;79034960;79035257;79035777;79036020;79036267;79036753;79037143;79041928	79031120;79034061;79035061;79035403;79035931;79036102;79036438;79036874;79038356;79042531	+	2977	Gcat	protein-coding	2.10378	5.47513	37.7244	3.31e-17	2.59e-15	29.8105
385493	chrX	93968656;93971803;93973977	93969930;93972033;93975470	+	3000	AU015836	ncRNA	-1.54967	6.25182	-37.7388	3.29e-17	2.59e-15	29.7686
71729	chr5	34949448;34964773;34975217;34999078;35019343;35020314;35021116;35022592;35023029;35024277;35025849;35026328;35026863;35028536;35030011;35030468;35031871	34949524;34966755;34975333;34999229;35019512;35020406;35021259;35022771;35023182;35024353;35026043;35026401;35026989;35028632;35030090;35030621;35033595	+	5599	Rgs12	protein-coding	-1.52746	6.1175	-37.7106	3.32e-17	2.59e-15	29.7639
16476	chr4	95049036	95052222	-	3187	Jun	protein-coding	-2.35375	4.64306	-37.5737	3.52e-17	2.7e-15	29.752
13518	chr1	34011825;34086242;34113933;34116118;34117432;34135090;34152202;34152413;34154513;34156599;34156781;34160620;34161004;34163009;34163626;34163897;34164076;34164327;34165058;34166180;34166942;34167276;34167611;34167823;34169164;34169750;34170360;34171116;34172183;34173002;34174115;34174697;34184016;34185962;34186819;34187972;34193392;34194005;34194515;34195828;34197201;34198518;34199292;34200870;342…	34011915;34086303;34114022;34116195;34117524;34135256;34152314;34152519;34154632;34156694;34156908;34160713;34161158;34163471;34163754;34163974;34164237;34164431;34165153;34166305;34167091;34167430;34167737;34168006;34169321;34169928;34170498;34171309;34172345;34173085;34174222;34174795;34184144;34186050;34186951;34193263;34193541;34194220;34194664;34196061;34197353;34198751;34199558;34201415;342…	+	23242	Dst	protein-coding	-1.24993	9.86864	-38.0361	2.9e-17	2.37e-15	29.7389
66573	chr14	118875520;118879344;118881010;118883365;118885606;118886498;118887068;118889256;118891770;118895851;118899986;118901501;118902015;118906895;118909434;118911342;118912442;118915190;118922243;118922911	118877262;118879512;118881140;118883567;118885659;118886627;118887230;118889392;118891832;118895907;118900042;118901549;118902155;118906957;118909571;118911503;118912566;118915274;118922791;118923167	-	4476	Dzip1	protein-coding	-2.04398	5.68413	-37.5432	3.57e-17	2.72e-15	29.7239
99151	chr2	29869494;29871023;29871275;29872563;29872808;29875605;29875988;29876161;29878004;29880613;29880915;29881696	29869725;29871133;29871392;29872697;29873012;29875724;29876064;29876267;29878136;29880740;29881118;29882840	+	2715	Cercam	protein-coding	-2.01192	5.38171	-37.4588	3.7e-17	2.79e-15	29.7003
22256	chr5	114130435;114131156;114132181;114135864;114136347;114137153;114138236	114130625;114131513;114132276;114135961;114136435;114137331;114139321	+	2097	Ung	protein-coding	1.61938	6.33384	37.5908	3.5e-17	2.7e-15	29.6983
68842	chr17	6106830;6138148;6176829;6185137;6198672;6201700;6206891;6213384;6214635;6219368;6222304;6224152;6229335;6231712;6236226	6106996;6139156;6176957;6185298;6198852;6201834;6207057;6213608;6214869;6219512;6222448;6224245;6229478;6234224;6240637	+	9863	Tulp4	protein-coding	-1.93943	5.41113	-37.4047	3.79e-17	2.84e-15	29.6748
107272	chr19	15905123;15906930;15909301;15914864;15917077;15918206;15919455;15920936;15924304;15924864	15906151;15907067;15909429;15915033;15917249;15918411;15919524;15920996;15924622;15925059	-	2491	Psat1	protein-coding	1.51068	7.55208	37.6637	3.39e-17	2.63e-15	29.6637
71435	chr2	20847919;20853038;20854935;20855354;20855581;20858901;20859067;20859718;20859881;20860304;20860971;20861186;20863080;20865265;20867802;20871392;20871610;20879961;20883200;20887106;20889875;20892085;20912277;20914632;20967330	20850385;20853069;20855040;20855395;20855706;20858990;20859140;20859796;20860036;20860446;20861107;20861250;20863364;20865390;20867838;20871494;20871768;20881851;20883229;20887160;20889953;20892177;20912301;20914811;20967721	-	6972	Arhgap21	protein-coding	-1.35964	7.05139	-37.5177	3.61e-17	2.74e-15	29.6238
68262	chr17	12119284;12151692;12198752;12210211;12210639;12213455;12215276;12216694;12218985	12119415;12151949;12198921;12210372;12210792;12213557;12215351;12216892;12219640	+	1910	Agpat4	protein-coding	-1.61355	5.62267	-37.1869	4.16e-17	3.06e-15	29.5652
21687	chr4	94739300;94780816;94798611;94799127;94804285;94804813;94811288;94820084;94827256;94827670;94829884;94837117;94849621;94851723;94853369;94855322;94858888;94859571;94863613;94864605;94865423;94873042;94873924	94739692;94781127;94798721;94799279;94804416;94804953;94811416;94820235;94827400;94827825;94830018;94837404;94849920;94851877;94853579;94855432;94859078;94859684;94863683;94864645;94865519;94873141;94874939	+	4654	Tek	protein-coding	-1.64468	6.02322	-37.153	4.22e-17	3.07e-15	29.5274
69051	chr1	180904274;180904744;180905874;180906163;180906595;180906790;180907477	180904530;180904814;180906053;180906384;180906687;180906953;180908088	+	1599	Pycr2	protein-coding	1.78418	6.01464	37.1339	4.26e-17	3.08e-15	29.5197
11641	chr4	57845248;57854562;57883024;57886289;57892869	57845306;57857037;57883202;57886327;57896984	+	6869	Akap2	protein-coding	-1.33325	7.08081	-37.2523	4.04e-17	3.02e-15	29.5048
114863	chr8	27042555;27045028;27045398;27045924;27049174;27051259;27052236;27053286	27042713;27045135;27045433;27045999;27050241;27051401;27052334;27056132	+	4536	Prosc	protein-coding	-1.39544	6.91088	-37.1735	4.18e-17	3.06e-15	29.4797
213948	chr5	24384181;24385224;24385446;24385753;24386008;24386310;24386948;24387387;24387689;24389781;24390462;24391017;24391204;24391370	24385071;24385363;24385569;24385849;24386141;24386546;24387127;24387543;24388443;24389922;24390623;24391081;24391247;24392143	-	3902	Atg9b	protein-coding	-2.71678	4.61646	-36.9351	4.64e-17	3.3e-15	29.4736
12857	chr8	120668290;120669309;120672725;120673221;120673971	120668355;120669382;120672892;120673352;120674209	+	679	Cox4i1	protein-coding	1.25559	8.61836	37.2343	4.08e-17	3.03e-15	29.4298
330171	chr5	114363572;114367209;114368342;114368941;114370059;114374896;114380426	114365866;114367404;114368394;114369030;114370228;114375109;114380505	-	3098	Kctd10	protein-coding	-1.51484	6.44896	-36.9824	4.54e-17	3.26e-15	29.4236
69700	chr15	71798476;71801877;71804114;71806215;71807896;71811048;71812827;71814534;71815945;71820031;71821930;71822636;71827691;71832070;71837328;71841274;71846170;71848539;71857251;71860960;71865632;71868961;71870111;71871805;71881606;71889517;71890488;71892186;71894814;71896734;71897563;71897872;71899106;71902817;71906528;71907018;71907600;71911041;71912719;71915106;71915784;71922893;71933409;71937290;719…	71799520;71801954;71804296;71806281;71808075;71811092;71812862;71814605;71815998;71820084;71821983;71822680;71827744;71832123;71837381;71841327;71846223;71848592;71857304;71861073;71865679;71869005;71870164;71871840;71881683;71889561;71890592;71892239;71894867;71896787;71897616;71897925;71899138;71902858;71906581;71907080;71907644;71911094;71912772;71915159;71915837;71922946;71933462;71937343;719…	-	6128	Col22a1	protein-coding	-2.93901	4.43502	-36.848	4.82e-17	3.37e-15	29.415
74325	chr13	54592939;54598722;54599044;54606644;54611078	54594042;54598833;54599161;54606690;54611272	-	1576	Cltb	protein-coding	-1.49701	6.75456	-37.0026	4.5e-17	3.25e-15	29.414
233863	chr7	125640954;125642447;125643326;125643874;125645515;125646474;125647340;125648397;125651063;125651863;125654467;125655844;125657486;125659057;125662259;125662577;125662959;125663408;125667024;125667312;125667994;125668854;125669149;125669583;125670475;125672685;125674057;125676483;125677301;125678826;125681102;125693139;125696461;125698949;125699344;125703831;125707457	125641733;125642639;125643365;125644372;125645804;125646733;125647627;125648569;125651156;125651925;125654579;125655925;125657628;125659214;125662447;125662655;125663094;125663546;125667201;125667408;125668091;125668999;125669418;125669767;125670578;125672838;125674193;125676685;125677616;125678941;125681263;125693262;125696557;125699092;125699520;125704040;125707688	-	6869	Gtf3c1	protein-coding	-1.3547	8.56954	-37.1763	4.18e-17	3.06e-15	29.4064
109620	chr13	38151294;38164764;38167516;38168606;38172779;38173818;38175068;38176396;38177187;38178434;38179048;38181098;38182202;38183115;38183946;38185096;38185573;38186595;38187741;38188450;38189546;38190395;38191361;38194696	38151794;38164866;38167664;38168780;38172907;38173868;38175229;38176500;38177282;38178559;38179200;38181252;38182328;38183316;38184172;38185262;38185711;38186788;38187903;38188533;38189653;38190493;38193655;38198577	+	9592	Dsp	protein-coding	-2.34178	6.84642	-36.8708	4.77e-17	3.35e-15	29.3645
14860	chr9	78191966;78198270;78199490;78204232;78205912;78207801;78209057	78192064;78198376;78199541;78204364;78206053;78207932;78209349	+	958	Gsta4	protein-coding	1.57381	7.41704	36.8929	4.72e-17	3.34e-15	29.3283
240334	chr18	61696837;61698364;61699293;61702196;61703512;61707494	61697976;61698504;61699504;61702370;61703718;61707635	-	2017	Pcyox1l	protein-coding	-1.92298	5.3214	-36.5218	5.55e-17	3.81e-15	29.2917
12874	chr11	76777208;76784387;76785019;76786271;76790827;76790995;76791864;76792736;76795441;76797581;76799789;76801640;76802232;76805976;76808710;76811695;76812382;76813483;76814771;76840388;76846224	76782410;76784486;76785204;76786402;76790891;76791090;76791995;76792871;76795636;76797904;76799958;76801782;76802334;76806085;76808877;76811886;76812731;76813652;76814913;76840635;76847008	-	9152	Cpd	protein-coding	-1.53179	6.88596	-36.6401	5.27e-17	3.65e-15	29.2444
114249	chr3	132882683;132885756;132890764;132891402;132904658;132906347;132906695;132908343;132909896;132917461;132931582;132948047;132949973	132884513;132886012;132890862;132891488;132905053;132906469;132906829;132908462;132910015;132917553;132931632;132948147;132950291	-	3732	Npnt	protein-coding	-2.72297	4.75461	-36.3594	5.96e-17	4.01e-15	29.2309
234378	chr8	70450228;70455466;70476850	70453019;70455648;70476943	-	3069	Klhl26	protein-coding	-2.03557	6.43176	-36.496	5.62e-17	3.83e-15	29.2169
282619	chr7	30751471;30754809;30755002;30755965	30753469;30754880;30755046;30756134	+	2286	Sbsn	protein-coding	-2.08556	5.35911	-36.326	6.05e-17	4.05e-15	29.2052
76295	chr3	35754138;35778025;35782512;35784507;35788087;35788426;35789558;35795759;35798594;35800484;35805734;35806768;35809357;35810121;35810646;35812063;35812213;35814044;35819909;35826945;35828601;35831366;35832921;35834295;35835239;35836959;35837486;35839049;35849434;35855105	35754410;35778141;35782601;35784587;35788194;35788554;35789661;35795806;35798658;35800565;35805884;35806965;35809596;35810296;35810714;35812136;35812316;35814225;35820112;35827098;35828703;35831511;35832980;35834422;35835377;35837024;35837589;35839214;35849564;35856276	+	4864	Atp11b	protein-coding	1.86447	6.34531	36.4541	5.72e-17	3.89e-15	29.1975
320615	chr9	86467154;86479625;86485413;86487254;86489578;86491981;86494396;86500796;86501874;86502993;86504177;86506195;86506405;86506871;86507504;86512561;86513825;86515258;86516967;86518154;86519873;86522763;86522954;86524224;86526772;86531715;86532930;86535908;86536115;86536443;86542359;86542735;86543009;86545241;86548170;86548801;86550003;86551646;86554016	86467296;86479678;86485603;86487435;86489748;86492170;86494494;86500895;86501983;86503101;86504297;86506314;86506519;86506900;86507737;86513179;86514099;86515410;86517064;86518413;86521859;86522874;86523136;86524349;86526906;86531770;86533034;86535974;86536259;86536522;86542468;86542884;86543070;86545393;86548306;86548856;86550167;86551775;86555806	+	9124	Dopey1	protein-coding	-1.67592	6.06949	-36.4011	5.85e-17	3.96e-15	29.1902
245128	chr7	3154658;3156266;3157905;3158218;3158555;3158755;3159052;3159429;3161231;3162202;3163893;3169015	3156108;3156374;3158071;3158429;3158657;3158894;3159274;3159541;3161408;3162360;3164297;3169203	-	3449	AU018091	protein-coding	-1.24595	7.45887	-36.5693	5.44e-17	3.75e-15	29.179
214112	chr11	46148155;46151261;46154604;46156766;46161854;46166234	46150774;46151421;46154694;46156822;46162093;46166359	-	3295	Nipal4	protein-coding	-3.3104	3.46021	-36.9294	4.65e-17	3.3e-15	29.164
26565	chr16	13715062;13725109;13727963;13730357	13715596;13725215;13728113;13730585	-	1022	Pla2g10	protein-coding	3.28373	3.49106	36.8309	4.85e-17	3.38e-15	29.1637
12153	chr14	70474555;70477853;70479545;70480154;70486147;70490020;70490547;70491351;70492076;70492405;70492779;70494713;70504682;70505332;70507453;70507999;70508456;70508750;70511581;70519869	70475249;70478103;70479758;70480281;70486930;70490200;70490707;70491476;70492271;70492550;70492895;70494815;70504797;70505456;70507558;70508214;70508573;70508914;70511694;70520260	-	4454	Bmp1	protein-coding	-2.30499	4.70869	-36.1967	6.41e-17	4.25e-15	29.1618
73284	chr3	137623672;137624132;137625966	137623883;137624273;137628332	+	2721	Ddit4l	protein-coding	-1.63724	5.78209	-36.2784	6.18e-17	4.12e-15	29.1527
74469	chrX	134460116;134464300;134465622;134465908;134466524;134467076;134467898;134470116;134470380;134471392;134472031;134472906;134476191	134460665;134464359;134465734;134466141;134466625;134467148;134467939;134470171;134470509;134471525;134472109;134472967;134476490	-	1935	Taf7l	protein-coding	-2.67707	4.23907	-36.1155	6.64e-17	4.37e-15	29.0925
54608	chr7	79273266;79294508;79297008;79323469;79325434;79348260;79350751;79353990;79355802;79358065;79359960	79273339;79294607;79297207;79323644;79325601;79348443;79350843;79354100;79355871;79358149;79361601	+	2903	Abhd2	protein-coding	-1.69249	6.15725	-36.1143	6.64e-17	4.37e-15	29.0551
80888	chr5	116408495;116415407;116422113	116409490;116415470;116422864	-	1812	Hspb8	protein-coding	-1.63712	6.05969	-36.0941	6.7e-17	4.39e-15	29.0513
13641	chrX	99136130;99145292;99146478;99146752;99147115	99137013;99145569;99146570;99146877;99148991	+	3258	Efnb1	protein-coding	-2.18092	4.80732	-35.7938	7.66e-17	4.95e-15	28.9836
14705	chr19	8837467;8839328;8841108;8843009;8845171;8846190;8846466;8847406;8847667;8847914;8848081;8848464	8837864;8839784;8841424;8843090;8845314;8846324;8846563;8847547;8847733;8847982;8848161;8848683	+	2210	Bscl2	protein-coding	-1.83644	5.48319	-35.6462	8.19e-17	5.26e-15	28.888
14733	chr1	92831686;92853347;92854858;92855907;92856987;92857248;92857472;92857855;92858332	92832097;92853505;92855246;92856072;92857117;92857367;92857605;92858030;92860196	+	3552	Gpc1	protein-coding	-2.07749	5.22953	-35.5932	8.38e-17	5.37e-15	28.881
21346	chr1	172500246;172505120;172505761;172506186;172506567	172500332;172505327;172505935;172506288;172507375	+	1382	Tagln2	protein-coding	-1.29553	7.38683	-35.8294	7.54e-17	4.89e-15	28.8444
71950	chr6	122707568;122711538;122712629;122713142	122707933;122711803;122712715;122713778	+	1356	Nanog	protein-coding	1.2512	8.2079	35.8831	7.36e-17	4.8e-15	28.832
67442	chr6	72598628;72600973;72601476;72602655;72603654;72604866;72605972;72606385;72606573;72606874;72607242	72598796;72601155;72601717;72602856;72603851;72604985;72606110;72606494;72606739;72607033;72607488	+	1937	Retsat	protein-coding	-1.90703	5.24424	-35.3624	9.3e-17	5.85e-15	28.7724
12305	chr17	35681567;35682624;35683437;35684095;35684995;35685306;35686481;35687145;35688539;35688786;35689667;35689994;35691128;35691447;35692856;35693592;35693788;35700431;35702004;35703924	35682518;35682773;35683671;35684313;35685122;35685550;35686591;35687310;35688690;35688869;35689913;35690180;35691230;35691594;35693084;35693694;35693917;35700590;35702044;35704139	-	4006	Ddr1	protein-coding	-1.63567	5.96122	-35.3976	9.16e-17	5.81e-15	28.7385
654470	chr5	122241515;122242606;122245501;122246485;122247532;122247920;122248849;122250447;122251612;122254484;122257470;122258835;122261407;122264138	122241835;122242725;122245663;122246625;122247617;122248045;122248983;122250467;122251721;122254583;122257621;122258965;122261527;122264460	-	2050	Tctn1	protein-coding	-2.13244	4.73356	-35.2261	9.89e-17	6.14e-15	28.7282
16952	chr19	20373434;20375225;20376652;20377607;20378396;20379649;20380340;20382050;20382862;20383757;20384475;20384693;20390612	20373770;20375347;20376710;20377702;20378489;20379705;20380419;20382140;20382975;20383851;20384583;20384772;20390671	-	1395	Anxa1	protein-coding	-1.87651	5.12114	-35.1535	1.02e-16	6.32e-15	28.682
17450	chr16	48431237;48437275;48442405;48446313;48449302;48450000;48452432;48460680;48479828;48498747;48500094;48502305;48510197;48514586;48558369;48561535;48565578;48582417;48586893;48592514;48612289;48615695;48618502;48622562;48624290;48626913;48630705	48431402;48437328;48442439;48446381;48449392;48450108;48452591;48460785;48479953;48498826;48500164;48502369;48510340;48514740;48558497;48561640;48565716;48582485;48587138;48592615;48612361;48615761;48618651;48622649;48624343;48627107;48630905	+	3050	Morc1	protein-coding	1.53857	6.6138	35.2875	9.62e-17	6e-15	28.6386
18810	chr15	76170974;76178519;76182910;76183091;76183362;76183523;76183967;76185311;76185609;76185854;76186141;76186360;76186611;76187637;76187979;76188173;76188464;76188708;76188871;76189257;76190102;76190459;76190849;76191017;76191242;76191420;76192181;76193221;76193410;76193966;76194341;76194559;76194751;76195424;76197980;76199294;76199549;76200469;76205598;76208062;76208424;76208965;76229358;76231174	76178385;76181899;76183008;76183195;76183445;76183879;76184105;76185489;76185766;76186037;76186267;76186514;76186763;76187762;76188074;76188277;76188625;76188785;76189180;76189411;76190195;76190586;76190944;76191136;76191348;76191535;76192347;76193313;76193487;76194001;76194430;76194573;76194812;76195710;76198209;76199406;76199835;76200607;76206321;76208253;76208653;76209165;76229497;76231378	-	17515	Plec	protein-coding	-2.17592	8.63297	-35.4385	8.99e-17	5.73e-15	28.6117
217012	chr11	82911253;82911680;82912395;82913204;82915050;82917032;82917729;82919724;82922748;82925887;82928655;82928932;82929421;82933832;82934745;82936374;82936824;82937736;82940189;82942491	82911359;82911847;82912431;82913379;82915139;82917199;82917897;82919894;82922919;82926187;82928749;82929073;82929561;82933959;82934811;82936487;82936939;82937853;82940344;82943406	+	3552	Unc45b	protein-coding	-2.28344	4.15322	-34.9888	1.1e-16	6.64e-15	28.6016
74682	chr12	8974001;8974934;8977363;8978598;8981032;8982761;8985629;8985967;8987278;8989905;8995640;8996069;9003997;9005763;9006720;9008002;9008479;9012661;9015970;9016437;9018086;9019878;9021730;9022719;9024194;9024886;9027483;9028006	8974179;8975051;8977434;8978690;8981160;8982894;8985794;8986112;8987403;8990090;8995672;8996129;9004141;9005832;9006773;9008111;9008689;9012741;9016106;9016640;9018232;9020010;9021840;9022883;9024334;9025042;9027723;9028847	+	4392	Wdr35	protein-coding	-1.57625	7.5788	-35.3141	9.51e-17	5.95e-15	28.597
110379	chr6	113728052;113729596;113730335;113730774;113734546;113735057;113736372;113737954;113740645	113728463;113729742;113730458;113730907;113734679;113735208;113736487;113737998;113740681	-	1301	Sec13	protein-coding	1.53665	5.96904	35.0984	1.05e-16	6.45e-15	28.5945
109050	chr3	105704599;105705458;105716369	105704825;105705537;105720842	+	4781	Fam212b	protein-coding	-2.65244	4.12873	-34.9757	1.11e-16	6.65e-15	28.5818
668225	chr15	101050194	101054399	-	4206	Fignl2	protein-coding	-2.06146	4.75871	-34.8562	1.17e-16	6.96e-15	28.5586
17122	chr5	34176580;34177598;34178810;34184314;34187329;34187510	34177149;34177760;34178924;34184343;34187428;34187710	-	1179	Mxd4	protein-coding	-2.08279	4.61569	-34.8491	1.18e-16	6.96e-15	28.5567
75796	chr8	116568724;116579168;116583007;116589250;116594962;116623784;116732798	116575287;116579311;116583217;116589422;116595179;116624366;116732991	-	8087	Cdyl2	protein-coding	1.41732	6.4646	35.0695	1.06e-16	6.46e-15	28.5442
20250	chr19	44293676;44294904;44298040;44299609;44301212;44303001	44294411;44295186;44298170;44299814;44301444;44306864	+	5453	Scd2	protein-coding	1.42322	7.33734	35.0839	1.06e-16	6.46e-15	28.4986
51791	chr13	55369732;55378007;55378220;55378702;55378876;55379303;55379580;55380005;55380900;55382845;55383118;55383335;55383525;55383654;55383996	55369936;55378028;55378398;55378794;55379019;55379446;55379691;55380117;55381103;55382921;55383244;55383416;55383571;55383768;55384687	+	2356	Rgs14	protein-coding	-3.43379	3.98312	-34.9155	1.14e-16	6.81e-15	28.4825
329908	chr4	106316213;106341214;106342342;106346535;106347279;106351933;106352682;106355674;106358400;106359016;106360123;106360418;106361903;106362157;106362338;106362688;106368027;106368723;106370069;106370984;106372688;106373659;106373991;106375647;106377329;106377509;106379039;106379229;106380069;106380428;106382235;106385423;106387479;106387690;106388501;106390193;106392358;106397169;106399050;106400971…	106316786;106341379;106342409;106346678;106347401;106351968;106352747;106355739;106358474;106359174;106360237;106360521;106362010;106362252;106362499;106362735;106368134;106368872;106370200;106371095;106372764;106373799;106374044;106375762;106377395;106377619;106379137;106379402;106380154;106380521;106382390;106385520;106387574;106387918;106388660;106390348;106392428;106397329;106399111;106401162…	+	10601	Usp24	protein-coding	-1.33057	7.67212	-35.0393	1.08e-16	6.52e-15	28.4611
17342	chr6	97807058;97929817;97941053;97991783;97993127;97994381;97996374;98003887;98006123;98010395;98013669;98017774	97807287;97929933;97941302;97991953;97993354;97994464;97996469;98004004;98006197;98010470;98013816;98021358	+	5178	Mitf	protein-coding	2.01734	4.81595	34.6384	1.29e-16	7.49e-15	28.4555
60507	chr9	21411837;21412233;21412393;21417065;21417272;21418284;21419291;21419439;21419625;21420036	21412097;21412301;21412531;21417143;21417387;21418422;21419366;21419548;21419712;21420279	+	1321	Qtrt1	protein-coding	1.58307	5.49348	34.7245	1.24e-16	7.31e-15	28.4538
19271	chr2	90429756;90430226;90432889;90439857;90440625;90444420;90446156;90446384;90448059;90449776;90449973;90450815;90452060;90453049;90453283;90455093;90458138;90459442;90460476;90463081;90464464;90468250;90469534;90471093;90474971;90478967;90580156	90430046;90430345;90436568;90439992;90440785;90444539;90446290;90446457;90448149;90449863;90449981;90450856;90452147;90453173;90453493;90455224;90458428;90459714;90460736;90463338;90464727;90468462;90469761;90471335;90474989;90479174;90580647	-	8253	Ptprj	protein-coding	-2.03537	5.64938	-34.6942	1.26e-16	7.36e-15	28.44
17886	chr15	77760589;77762952;77763222;77763792;77764300;77764505;77765700;77766714;77767131;77767451;77768792;77769201;77769505;77769767;77771125;77771824;77773272;77773935;77774557;77775074;77775803;77776891;77777768;77779990;77781111;77781322;77783389;77785093;77786487;77787510;77788919;77789868;77790704;77791048;77791716;77792254;77795961;77797001;77807868;77812880;77841957	77762016;77763124;77763330;77764000;77764423;77764593;77765828;77766875;77767343;77767663;77769040;77769353;77769609;77769973;77771269;77772036;77773443;77774058;77774694;77775280;77775934;77776999;77777928;77780059;77781232;77781515;77783503;77785266;77786660;77787662;77789037;77789963;77790847;77791146;77791779;77792346;77796054;77797028;77808024;77813231;77842115	-	7371	Myh9	protein-coding	-1.19975	9.15557	-35.0705	1.06e-16	6.46e-15	28.4129
22032	chr11	78158423;78160793;78161033;78161287;78161518;78162382;78165298	78160548;78160948;78161194;78161448;78161622;78162433;78165550	-	3016	Traf4	protein-coding	-1.55719	6.84274	-34.7947	1.2e-16	7.11e-15	28.3941
19128	chr16	62854334;62885401;62888981;62898876;62900326;62900553;62903492;62907662;62909998;62913798;62918075;62919513;62924516;62926328;62928033	62854504;62885558;62889005;62898962;62900448;62900684;62903617;62907783;62910113;62913987;62918242;62919681;62924664;62926553;62929340	+	3270	Pros1	protein-coding	-1.90526	6.54509	-34.6349	1.3e-16	7.49e-15	28.3448
68939	chr5	74195326;74196103;74197267;74198109	74195590;74196159;74197343;74199477	+	1768	Rasl11b	protein-coding	-2.555	4.01379	-34.4336	1.42e-16	8.07e-15	28.3296
333433	chr9	114899339;114903661;114904775;114910876;114914326;114916981;114920522;114933671	114902502;114903767;114905008;114910988;114914464;114917121;114920699;114933987	-	4393	Gpd1l	protein-coding	2.18107	5.01034	34.3331	1.49e-16	8.29e-15	28.3076
71228	chr14	24133953;24136569;24137130;24138237;24138608;24144302;24146152;24147073;24148208;24149363;24150139;24150512;24154231;24154600;24155141;24156472;24156946;24157735;24160245;24164031;24164398;24165245;24166161;24170430;24172020;24176396;24177728;24190318;24191148;24192792;24202298;24245147	24135673;24136678;24137239;24138364;24138751;24144495;24146322;24147221;24148391;24149512;24150272;24150674;24154381;24154689;24155253;24156616;24157069;24158754;24160337;24164134;24164573;24165372;24166293;24170555;24172204;24176708;24177987;24190501;24191291;24192954;24202366;24245920	-	7853	Dlg5	protein-coding	-1.58319	6.95779	-34.6211	1.31e-16	7.49e-15	28.3045
14027	chr11	116220559;116225068;116225262;116225484;116226989;116227558;116227842;116228059;116229401;116229745;116229969;116230416;116230918;116232394;116232630;116232825;116233104;116233386;116234155;116234369;116234932;116237900	116224201;116225160;116225372;116225567;116227139;116227751;116227980;116228237;116229573;116229842;116230123;116230562;116231043;116232489;116232737;116232986;116233142;116233511;116234281;116234523;116235031;116238091	-	6398	Evpl	protein-coding	-1.93618	4.80379	-34.2749	1.53e-16	8.39e-15	28.2865
50798	chr4	44034075;44038947;44040254;44041663;44042163;44044759;44045903;44052771;44055205;44059776;44066755;44072362;44084048	44037353;44039063;44040436;44041884;44042292;44044969;44045990;44052983;44055357;44060227;44066960;44072673;44084177	-	5696	Gne	protein-coding	-1.7249	5.43501	-34.3131	1.51e-16	8.3e-15	28.2684
225523	chr18	53681723;53685883;53697595;53703122;53706820;53709057;53713382;53714764;53715000;53718447;53719216;53721623;53723083;53724354;53727547;53731091;53735643;53738478;53740052;53744282;53744488	53683464;53686028;53697693;53703244;53706981;53709149;53713471;53714916;53715096;53718629;53719365;53721800;53723305;53724581;53727744;53731239;53735784;53738592;53740208;53744347;53744547	-	4554	Cep120	protein-coding	-1.76806	5.91873	-34.3583	1.47e-16	8.26e-15	28.2557
52538	chr18	74779212;74787119;74792351;74793287;74795131;74798312;74799045;74801297;74804001;74805855	74779265;74787285;74792479;74793403;74795278;74798487;74799174;74801367;74804155;74806207	+	1500	Acaa2	protein-coding	1.57399	6.39714	34.4385	1.42e-16	8.07e-15	28.2523
72301	chr15	84379203;84406446;84417100;84420137;84446999	84384392;84406763;84417313;84420232;84447097	-	5917	1810041L15Rik	protein-coding	-2.69031	3.79764	-34.3239	1.5e-16	8.29e-15	28.2426
434423	chr9	78367052;78367721;78367985	78367294;78367903;78368199	-	641	Dppa5a	protein-coding	1.52295	9.27237	34.7054	1.26e-16	7.35e-15	28.2347
22152	chr8	123411564;123418093;123418940;123420607	123411662;123418201;123419050;123422010	+	1723	Tubb3	protein-coding	1.55551	5.88369	34.2937	1.52e-16	8.35e-15	28.2204
21812	chr4	47353305;47383749;47393247;47396355;47402803;47403370;47405529;47406922;47410652	47353396;47383994;47393489;47396585;47402970;47403526;47405653;47407052;47414924	+	5666	Tgfbr1	protein-coding	-1.67367	6.33637	-34.3303	1.49e-16	8.29e-15	28.2092
216795	chr11	59306930;59327564;59328502;59330893	59307067;59327820;59328764;59333552	+	3318	Wnt9a	protein-coding	-3.58676	3.86023	-34.3668	1.47e-16	8.26e-15	28.1992
26971	chr4	138750533;138753263;138754126;138756707;138757361	138752423;138753372;138754270;138756759;138757598	-	2437	Pla2g2f	protein-coding	-4.13591	3.08231	-35.3878	9.2e-17	5.81e-15	28.1855
16324	chr1	119415465;119420627	119418097;119422248	-	4255	Inhbb	protein-coding	2.94289	3.79047	34.1927	1.59e-16	8.68e-15	28.1742
545085	chr15	7873055;7884281;7885563;7887329;7889076;7920487;7922069;7924208;7976968;8019589;8035731;8042711;8046430;8079160;8082462;8093676;8098956;8099119	7873253;7884443;7885679;7887408;7889176;7920625;7922153;7924307;7977142;8019665;8035884;8042844;8046489;8079364;8082582;8093759;8099021;8099209	-	2151	Wdr70	protein-coding	-1.56527	5.85651	-34.1707	1.61e-16	8.74e-15	28.1662
16403	chr2	71787083;71816630;71818481;71819999;71822438;71825509;71826390;71826723;71827896;71833696;71834009;71838268;71838578;71840562;71840786;71841067;71841249;71841479;71841644;71843129;71845783;71845973;71846164;71849381;71853534;71855854	71787320;71816754;71818560;71820254;71822569;71825719;71826583;71826811;71828014;71833794;71834070;71838428;71838721;71840677;71840975;71841150;71841328;71841556;71841746;71843302;71845881;71846083;71846262;71849506;71853663;71856758	+	4205	Itga6	protein-coding	-1.12805	8.22756	-34.4629	1.4e-16	8.02e-15	28.1603
54419	chr17	23679365;23679758;23681048	23679407;23679821;23682446	+	1506	Cldn6	protein-coding	-1.67206	5.41049	-33.988	1.75e-16	9.38e-15	28.1138
68724	chr1	135146834;135152471;135152793;135154176;135154408;135154713;135155222	135147100;135152551;135152866;135154269;135154475;135154783;135156268	+	1702	Arl8a	protein-coding	-1.55341	6.09941	-34.0543	1.7e-16	9.13e-15	28.0916
72475	chr4	106911470;106912903;106913205;106915645;107009679;107027217;107028193;107030862;107031015;107036936;107037602;107038222;107038726;107039963;107046316;107047242;107047364;107048024	106911912;106912975;106913266;106915729;107009768;107027297;107028252;107030928;107031091;107037000;107037650;107038257;107038780;107040033;107046394;107047270;107047465;107049694	+	3195	Ssbp3	protein-coding	-1.57002	5.67669	-33.9261	1.8e-16	9.55e-15	28.0624
74637	chr11	73199482;73203922;73213331;73214055;73214965;73217799;73222781	73199680;73204063;73213514;73214207;73215140;73217999;73224506	+	2781	Shpk	protein-coding	-3.47797	3.65916	-34.1515	1.62e-16	8.79e-15	28.0602
213783	chr10	3740377;3802740;3872667;3872927;3903557;3919136;3930207;3933597;3937850;3940169;3940438;3940634;3945891;3947520;3949667;3952311;3956546;3963401	3740540;3802800;3872725;3873441;3903657;3919205;3930253;3933747;3937981;3940351;3940533;3940726;3945924;3947603;3949705;3952333;3958205;3967303	+	7415	Plekhg1	protein-coding	-1.66114	6.07213	-33.9501	1.78e-16	9.51e-15	28.0455
68559	chr2	153008890;153010258;153012381;153014010;153015234	153009736;153010338;153012455;153014085;153015383	-	1229	Pdrg1	protein-coding	-1.63113	5.76603	-33.8743	1.85e-16	9.75e-15	28.0317
18710	chr4	116221914;116256168;116259545;116270788;116272739;116286056;116286823;116291675;116292097;116299634	116222413;116256276;116259643;116270968;116272864;116286198;116286999;116291749;116292267;116303056	+	5004	Pik3r3	protein-coding	-1.84927	5.47281	-33.7379	1.97e-16	1.02e-14	27.9924
70292	chr5	35893319;35935552;35936038;35945188;35948035;35950855;35961746;35962205;35968570;35974388;35976492;35984189;35989554;35993541;35995957;35997518;35999699	35893540;35935680;35936132;35945296;35948246;35951034;35961847;35962286;35968719;35974599;35976637;35984306;35989668;35993705;35996147;35997682;36003922	+	6617	Afap1	protein-coding	-1.70066	5.66185	-33.7094	2e-16	1.03e-14	27.9614
69253	chr9	50751072;50752177	50751733;50752354	-	840	Hspb2	protein-coding	-2.87622	3.94154	-33.6464	2.06e-16	1.05e-14	27.9471
107684	chr4	46536937;46540418;46541893;46542235;46543348;46544063;46545612;46546649;46548768;46551329;46562895;46564688;46566277	46539267;46540689;46541983;46542347;46543444;46544167;46545728;46546828;46548917;46551445;46563097;46564861;46566440	-	4114	Coro2a	protein-coding	-3.1392	4.0363	-33.6028	2.1e-16	1.07e-14	27.9257
217721	chr12	85746539;85782957;85786088;85796175;85798498;85803135;85804368;85804596;85805196;85812042	85747589;85783098;85786228;85796242;85798601;85803245;85804473;85804707;85805251;85813585	+	3435	Mfsd7c	protein-coding	-2.33918	4.90391	-33.4942	2.21e-16	1.11e-14	27.9166
13424	chr12	110601395;110612345;110614045;110614353;110614891;110616340;110616698;110617620;110619189;110620299;110621527;110624509;110625427;110625731;110625922;110626859;110627940;110628233;110628724;110628908;110629277;110629577;110629823;110630498;110630744;110631609;110632640;110633153;110634219;110635501;110635895;110636326;110637106;110637496;110638739;110639734;110640146;110640499;110640819;110641102…	110601854;110612432;110614218;110614608;110615077;110616611;110616925;110618696;110619368;110620448;110621673;110624649;110625603;110625841;110626041;110627098;110628095;110628346;110628834;110629117;110629423;110629743;110629996;110630663;110630932;110631803;110632922;110633253;110634378;110635744;110636078;110636538;110637344;110637652;110638966;110639964;110640286;110640732;110641025;110641223…	+	14398	Dync1h1	protein-coding	-1.38066	9.94261	-34.0893	1.67e-16	9.01e-15	27.9106
20971	chr2	164424247;164428893;164429680;164431187;164443090	164426237;164429088;164429726;164431313;164443188	-	2460	Sdc4	protein-coding	-1.20872	8.58633	-33.9285	1.8e-16	9.55e-15	27.8855
16886	chr11	3343297;3346235;3347052;3347574;3348594;3350392;3350642;3352291;3353277;3355273;3355811;3356053;3358110;3358995;3360451;3370969;3392917;3409046	3345884;3346392;3347107;3347748;3348659;3350448;3350773;3352377;3353463;3355469;3355916;3356141;3358298;3359104;3360586;3371392;3393016;3409235	-	5047	Limk2	protein-coding	-1.24871	7.83352	-33.8313	1.89e-16	9.88e-15	27.8708
18082	chr11	4874003;4883368;4883726;4884022;4888880;4889097;4889533;4889892;4891403;4893120	4874103;4883495;4883771;4884116;4888950;4889237;4889564;4889986;4891486;4894200	+	1874	Nipsnap1	protein-coding	1.46131	5.91527	33.5397	2.17e-16	1.09e-14	27.8512
279561	chrX	151198084;151207598;151209275;151210873;151226456;151230233;151232945;151236534;151236893;151266268;151274918;151276853;151284270;151284505;151285779;151286260;151293810;151294422;151295364;151301566;151309282;151314799	151198673;151207770;151209495;151211030;151226544;151230452;151233239;151236634;151237036;151266332;151275065;151276969;151284425;151284556;151285916;151287206;151293900;151294552;151295974;151301774;151309484;151320152	+	10213	Wnk3	protein-coding	1.49809	7.09217	33.6824	2.02e-16	1.04e-14	27.8381
16777	chr12	31265294;31266691;31269057;31272430;31278462;31278736;31282557;31285626;31287416;31287879;31288203;31289342;31297626;31298813;31299924;31300207;31301006;31302562;31302904;31304590;31305767;31306975;31307950;31318264;31319919;31320898;31323462;31324176;31326170;31326568;31327645;31329110;31329357	31265601;31266866;31269192;31272503;31278650;31278799;31282759;31285746;31287604;31288058;31288315;31289421;31297761;31298971;31300051;31300330;31301210;31302705;31303135;31304753;31305991;31307189;31308046;31318633;31320103;31321139;31323665;31324320;31326377;31326709;31327821;31329269;31329639	+	5778	Lamb1	protein-coding	-1.07335	8.25451	-33.758	1.95e-16	1.02e-14	27.8155
67144	chr3	158036703;158040441;158041586;158043561;158048401;158051697;158052764;158054581;158054786;158055718;158058670;158061238;158062649;158063684;158066113	158036876;158040622;158041659;158043690;158048524;158051839;158052936;158054668;158054831;158055826;158058777;158061348;158062726;158063869;158068478	+	4092	Lrrc40	protein-coding	1.74508	6.08961	33.4663	2.24e-16	1.11e-14	27.8073
12176	chr7	138890836;138894380;138894610;138897996;138898681;138909363	138891960;138894529;138894716;138898077;138898828;138909506	-	1756	Bnip3	protein-coding	2.34039	5.43456	33.3047	2.42e-16	1.18e-14	27.7928
666634	chr6	116173634	116174514	+	881	Gm8203	unknown	1.69931	5.94656	33.4048	2.31e-16	1.14e-14	27.7873
13008	chr10	110920176;110931955;110935148;110937737;110938637;110939211	110920254;110932067;110935316;110937866;110938730;110939514	+	889	Csrp2	protein-coding	1.30529	6.52042	33.4941	2.21e-16	1.11e-14	27.7801
108907	chr2	119618298;119624118;119627547;119630337;119633720;119635478;119638448;119639577;119643784;119647090;119648893	119618895;119624186;119627693;119630505;119633818;119635587;119638563;119639734;119643900;119647198;119650160	+	2960	Nusap1	protein-coding	1.25086	6.58288	33.4883	2.22e-16	1.11e-14	27.772
77531	chr10	89873509;90033214;90042546;90049816;90069468;90071068;90073979;90076976;90163161;90260653;90307569;90359035;90510596;90512815;90575727;90576691;90644458;90680767;90895099;90897247;90914693;90921296;90923531;90940564;90941426;90948535;90966225;90967006	89873805;90033294;90042702;90050112;90069543;90071169;90074092;90077142;90163304;90260818;90307705;90359215;90511182;90512875;90575739;90577195;90644556;90680919;90895206;90897426;90914767;90921424;90923602;90940575;90941512;90948672;90966392;90972985	+	10286	Anks1b	protein-coding	-3.29778	3.13652	-33.8521	1.87e-16	9.82e-15	27.7691
27361	chr17	24736642;24739499;24740080;24741906;24742310	24736762;24739647;24740194;24741937;24742778	+	886	Msrb1	protein-coding	-1.42749	5.9116	-33.3669	2.35e-16	1.16e-14	27.7685
54484	chr6	39397821;39399798;39400395;39401210;39404648;39405731;39410088;39420099	39399434;39399936;39400505;39401424;39404874;39405960;39410216;39420369	-	2936	Mkrn1	protein-coding	1.12655	8.71733	33.6972	2.01e-16	1.03e-14	27.7655
18081	chr13	49187547;49193736;49194894;49195604	49187637;49193964;49195057;49196251	+	1132	Ninj1	protein-coding	-2.2352	4.47076	-33.1611	2.6e-16	1.25e-14	27.7649
22417	chr4	137277635;137289114;137295441;137295660;137296312	137277756;137289349;137295572;137295802;137299501	+	3823	Wnt4	protein-coding	-4.15963	3.56411	-33.7749	1.94e-16	1.01e-14	27.7582
54383	chr4	128654702;128688738;128704998;128707937;128708977;128709499;128711058;128712059;128722909;128723548;128727571;128743354;128745002;128745790;128747101;128748008;128751500	128654816;128688845;128705234;128708095;128709054;128709663;128711144;128712359;128723300;128723713;128727870;128743556;128745131;128745904;128747242;128748284;128752881	+	4357	Phc2	protein-coding	-1.68177	5.84944	-33.2351	2.51e-16	1.21e-14	27.714
244954	chr9	86743633;86755158	86743806;86757508	+	2525	Prss35	protein-coding	1.85388	4.65417	33.0128	2.79e-16	1.32e-14	27.686
56643	chr14	121459621;121462467;121464903;121465882;121466120;121471278;121473006;121474546;121475965;121478059;121478231;121478392;121479969;121480656;121481747;121484848;121486637;121486994;121489790;121490993;121491229;121491674;121505219	121460773;121462574;121465046;121465990;121466227;121471327;121473155;121474665;121476046;121478147;121478263;121478436;121480058;121480742;121481829;121484931;121486727;121487093;121489909;121491134;121491310;121491690;121505254	-	3123	Slc15a1	protein-coding	3.42739	3.20678	33.5947	2.11e-16	1.07e-14	27.6842
16202	chr7	105736590;105736725;105737101;105740177;105740513;105740771;105740960;105741148;105741374;105741580;105741787;105741997;105742207;105742513	105736716;105736806;105737237;105740342;105740608;105740867;105741043;105741233;105741483;105741707;105741908;105742096;105742337;105742925	+	1879	Ilk	protein-coding	-1.80138	5.39515	-33.0952	2.68e-16	1.28e-14	27.6834
18186	chr8	128359073;128363219;128418713;128425742;128431892;128434209;128457857;128460612;128468347;128476150;128480885;128487897;128493027;128497820;128498505;128500622;128502525	128359632;128363393;128418894;128425969;128432047;128434375;128458012;128460756;128468678;128476294;128480989;128487956;128493164;128498091;128498601;128500672;128505476	+	5921	Nrp1	protein-coding	-4.13997	2.86598	-34.4247	1.43e-16	8.07e-15	27.6775
108937	chr7	99920254;99927093;99935162;99942959;99955467;99979972	99926483;99927192;99935280;99943105;99955540;99980458	-	7157	Rnf169	protein-coding	-1.44411	6.88674	-33.2855	2.45e-16	1.19e-14	27.6561
68026	chr9	65890323;65890732;65893372;65901558	65890474;65890809;65893534;65903551	+	2387	2810417H13Rik	protein-coding	1.97944	4.47938	32.9377	2.89e-16	1.36e-14	27.6555
69134	chr14	34351882;34353698;34355286	34352077;34353760;34355393	-	367	Fam25c	protein-coding	1.85034	5.5028	33.058	2.73e-16	1.29e-14	27.6551
73710	chr13	34127008;34128872;34129246;34130177	34128531;34128982;34129354;34130354	-	1922	Tubb2b	protein-coding	1.97422	6.31789	33.178	2.58e-16	1.24e-14	27.6522
68151	chr3	159839695;159848565;159872909;159897331;159901382;159907115;159909653;159911298;159911760;159913761;159914936;159923427;159934251	159840047;159848645;159873181;159897455;159901543;159907251;159909821;159911395;159911823;159913904;159915019;159923580;159935175	+	2769	Wls	protein-coding	-2.38001	4.44707	-32.9127	2.93e-16	1.37e-14	27.645
226101	chr19	37899036;37901237;37901824;37903677;37905278;37907587;37910894;37911090;37913337;37915606;37916393;37920719;37921336;37922958;37924606;37926983;37930986;37932603;37934760;37935847;37936061;37936314;37937864;37939300;37939845;37942218;37943443;37945631;37949551;37951427;37952943;37954367;37956443;37959714;37960920;37967016;37968328;37972175;37974584;37974858;37977650;37980349;37981223;37981878;379…	37899767;37901384;37901933;37903867;37905377;37907728;37910989;37911178;37913476;37915754;37916563;37920810;37921491;37923083;37924704;37926994;37931062;37932768;37934921;37935945;37936219;37936495;37937941;37939408;37940018;37942363;37943548;37945745;37949714;37951558;37953098;37954559;37956549;37959838;37961097;37967132;37968452;37972257;37974627;37974926;37977753;37980475;37981338;37981908;379…	-	7094	Myof	protein-coding	-1.22258	8.17379	-33.3681	2.35e-16	1.16e-14	27.6264
207792	chr1	155212471;155217382;155218260;155221335;155223275;155224911;155232446;155240736;155241425	155213713;155217566;155218387;155221587;155223431;155226448;155232589;155240799;155242323	-	4611	BC034090	protein-coding	-2.61757	3.47281	-33.0723	2.71e-16	1.29e-14	27.6163
21343	chr5	138178617;138179413;138179780;138180891;138181118;138181908;138182201;138182414;138182598;138183095;138183314;138183568;138183839;138184332;138187170	138179147;138179610;138179953;138181016;138181192;138182090;138182302;138182491;138182743;138183214;138183370;138183721;138183925;138184547;138187186	-	2264	Taf6	protein-coding	-1.24149	7.08527	-33.201	2.55e-16	1.23e-14	27.5986
234673	chr8	104926260;104927008;104928728;104929482;104929697;104930666;104931066;104931328;104931842;104932400;104932924;104933528	104926396;104927212;104928869;104929615;104929955;104930764;104931206;104931408;104931986;104932537;104932996;104934672	+	2699	Ces2e	protein-coding	-3.93729	3.50331	-33.3361	2.39e-16	1.17e-14	27.5863
12292	chr1	136052901;136054579;136068921;136070634;136070910;136073507;136075067;136076727;136077629;136079479;136084215;136085292;136086684;136087324;136088303;136089020;136091698;136092587;136093260;136094881;136095463;136095770;136097078;136097365;136098172;136098532;136100600;136101479;136104570;136105448;136105784;136106402;136107017;136108080;136110866;136111978;136112910;136113283;136115148;136115925…	136053052;136054684;136069060;136070776;136071062;136073712;136075170;136076872;136077710;136079639;136084440;136085499;136086804;136087438;136088396;136089089;136091830;136092716;136093319;136094987;136095550;136095877;136097130;136097511;136098373;136098690;136100710;136101562;136104626;136105576;136105849;136106493;136107176;136108207;136110962;136112080;136113011;136113407;136115276;136116175…	+	6260	Cacna1s	protein-coding	-1.79851	4.97932	-32.7408	3.18e-16	1.47e-14	27.5371
19171	chr8	105935728;105935996;105936696;105936866;105937241;105937494;105937679;105937955	105935905;105936147;105936754;105936981;105937381;105937591;105937766;105938392	-	1270	Psmb10	protein-coding	2.1027	4.71582	32.6975	3.25e-16	1.49e-14	27.5317
98386	chr1	181815315;181817265;181817489;181818840;181819864;181820674;181821436;181825622;181828712;181831542;181832149;181836058;181838378;181842288	181817018;181817387;181817569;181819008;181819989;181820777;181821627;181825676;181828908;181831734;181832232;181836288;181838556;181842401	-	3552	Lbr	protein-coding	1.18888	7.62582	33.0966	2.68e-16	1.28e-14	27.5153
12614	chr15	85898758;85900937;85901439;85902115;85902449;85902802;85903286;85903926;85905439;85905915;85907595;85916614;85918909;85921148;85922123;85924058;85925396;85926086;85926931;85927898;85928315;85929401;85929832;85930513;85931242;85932284;85937844;85939102;85939547;85941117;85959128;85960067;85963084;85978602;86030182	85900705;85901198;85901672;85902264;85902552;85902896;85903411;85904052;85905518;85906027;85907769;85916814;85919035;85921315;85922327;85924201;85925579;85926295;85927025;85927999;85928498;85929521;85929973;85930687;85931355;85932469;85938010;85939227;85939710;85941274;85959216;85960182;85963306;85979240;86033777	-	11050	Celsr1	protein-coding	-1.84229	5.77199	-32.7574	3.16e-16	1.47e-14	27.4866
399510	chr12	69803757;69807198;69809212;69811274;69813136;69815755;69816290;69818022;69818384;69818809;69822803;69823422;69824580;69825742;69826291;69827362;69828024;69830429;69831552;69837995;69841920;69842888;69844356;69845681;69849547;69850826;69850954;69852699;69856281;69856773;69874277;69892653	69805351;69807253;69809282;69811366;69813204;69815932;69816393;69818080;69818498;69818811;69822863;69823501;69824664;69825783;69826388;69827518;69828066;69830496;69831610;69838073;69842036;69842969;69844418;69845812;69849619;69850868;69851001;69852754;69856345;69856863;69874334;69893163	-	4454	Map4k5	protein-coding	-1.41793	6.46225	-32.872	2.99e-16	1.4e-14	27.4791
108100	chr11	119943092;119957102;119960157;119980789;119981393;119981989;119993696;119996523;119996889;119997489;119998634;119999135;120000552;120001074;120006359	119943248;119957177;119960243;119980850;119981464;119982126;119993848;119996747;119997090;119997690;119998702;119999297;120000586;120002618;120006782	+	3610	Baiap2	protein-coding	-1.47635	6.32739	-32.8098	3.08e-16	1.43e-14	27.4593
21407	chr2	152143609;152148696	152144138;152149097	+	932	Tcf15	protein-coding	2.87121	3.78499	32.6071	3.4e-16	1.54e-14	27.448
109181	chr12	101837372;101844780;101845058;101845732;101846596;101862593;101871824;101873323;101877955;101878789;101883256;101886808;101889705;101890578;101893431;101894262;101895651;101898825;101902232;101905755;101912690	101837766;101844924;101845174;101845846;101846677;101862692;101871927;101873486;101878148;101878929;101886276;101887020;101889791;101890618;101893793;101894427;101895716;101899103;101902342;101905816;101913171	-	6448	Trip11	protein-coding	-2.04758	4.71682	-32.484	3.61e-16	1.59e-14	27.4271
66276	chr19	8888903;8889124;8890003;8890411	8888964;8889248;8890100;8890740	+	615	1810009A15Rik	protein-coding	1.43371	6.08569	32.7116	3.23e-16	1.49e-14	27.4257
73095	chr8	70184340;70188300;70188833;70189411;70190063;70191861;70194124;70212228	70186776;70188451;70188949;70189577;70190088;70191966;70194236;70212281	-	3172	Slc25a42	protein-coding	-1.70965	4.72082	-32.4726	3.63e-16	1.59e-14	27.417
77552	chr1	135371456;135372197;135373152;135374378;135374889	135371996;135372364;135373285;135374549;135375063	-	1190	Shisa4	protein-coding	-2.58225	4.1795	-32.4287	3.71e-16	1.61e-14	27.4026
215418	chr9	119971166;119973364;119974154;119977002;119984634	119973211;119973678;119974413;119977245;119984658	-	2890	Csrnp1	protein-coding	-1.35685	6.58434	-32.6343	3.35e-16	1.54e-14	27.3491
195018	chr11	72796226;72817931;72821755;72823380;72824075;72826052;72830578;72831543;72837183;72843256;72844339;72848642;72850559;72851834;72853159;72855383;72858331;72859582;72863875;72864736;72864957;72865825;72866072;72866604;72867922;72869687;72872604;72873864;72874898;72876556;72880571;72881216;72884342;72886634;72888143;72888997;72891092;72893262;72895146;72899504;72900632;72901327;72906832;72908394;729…	72796650;72818075;72821949;72823551;72824274;72826262;72830694;72831721;72837281;72843347;72844487;72848753;72850771;72851934;72853328;72855516;72858401;72859696;72864034;72864857;72865079;72865991;72866153;72866805;72868070;72869927;72872683;72873957;72875360;72876720;72880690;72881377;72884471;72886772;72888308;72889259;72891225;72893412;72895285;72899694;72900806;72901459;72907031;72908513;729…	+	11150	Zzef1	protein-coding	-1.41241	6.32978	-32.5712	3.46e-16	1.55e-14	27.3374
16410	chr2	83724397;83736510;83747853;83755806;83761868;83763652;83765768;83766627;83768295;83768692;83770053;83771135;83776368;83779014;83781939;83783805;83785333;83788917;83791195;83791893;83792551;83794234;83794919;83795439;83796086;83797351;83801770;83801978;83802880;83803240	83724919;83736640;83747944;83755920;83761929;83763697;83765893;83766671;83768338;83768748;83770105;83771337;83776559;83779059;83782046;83783863;83785487;83789054;83791262;83792040;83792643;83794313;83794999;83795544;83796244;83797452;83801883;83802085;83803002;83806916	+	7054	Itgav	protein-coding	-1.67875	6.57673	-32.5922	3.42e-16	1.54e-14	27.3348
21387	chr11	85890063;85890857;85896765;85898493;85899750;85911107;85911936;85912106;85914129	85890263;85890951;85897010;85898612;85899897;85911259;85912024;85912341;85916097	+	3257	Tbx4	protein-coding	-3.28202	3.51766	-32.5734	3.46e-16	1.55e-14	27.3335
18763	chr17	24549950;24564150;24564336;24564579;24565011;24565787;24567127;24567597;24568213;24568626;24569352;24571180;24571521;24571976;24572618;24576438;24577519;24577750;24578096;24578379;24578811;24579721;24579955;24580875;24581191;24581563;24585677;24585923;24586164;24586462;24587179;24587400;24587650;24587928;24590819;24591015;24591287;24591838;24592611;24593205;24593476;24593799;24594088;24594461;245…	24550477;24564221;24564407;24564748;24565682;24565970;24567344;24567712;24568339;24568861;24570104;24571311;24571696;24572109;24576243;24576587;24577662;24578029;24578309;24578538;24578960;24579865;24580575;24581031;24581443;24581758;24585847;24586066;24586374;24586588;24587292;24587449;24587834;24588021;24590937;24591217;24591481;24591977;24592723;24593346;24593601;24593973;24594378;24594595;245…	+	14170	Pkd1	protein-coding	-1.54682	6.54298	-32.5858	3.43e-16	1.54e-14	27.3313
11307	chr17	31057694;31064385;31092309;31094646;31098253;31104037;31105517;31106060;31108306;31108615;31109483;31110957;31111221;31112929;31114057	31057856;31064628;31092426;31094778;31098303;31104182;31105640;31106174;31108454;31108716;31109651;31111057;31111379;31113047;31117984	+	5821	Abcg1	protein-coding	-1.41182	5.71673	-32.4333	3.7e-16	1.61e-14	27.3183
108037	chr10	127517123;127518025;127518225;127518471;127518792;127519121;127519389;127519630;127519971;127520338;127520918;127522288	127517916;127518132;127518380;127518570;127518957;127519260;127519511;127519711;127520171;127520417;127521115;127522444	-	2305	Shmt2	protein-coding	1.71477	7.00323	32.6212	3.38e-16	1.54e-14	27.3168
17135	chr5	139791536;139799139;139800085	139791712;139799218;139802652	+	2825	Mafk	protein-coding	-1.82724	5.15702	-32.3143	3.93e-16	1.68e-14	27.3128
110310	chr15	101412403;101413969;101416221;101418318;101419503;101420474;101423270;101427089;101427514	101412779;101414180;101416281;101418413;101419667;101420599;101423490;101427123;101427806	+	1586	Krt7	protein-coding	-1.66074	6.01601	-32.4611	3.65e-16	1.6e-14	27.3126
67374	chr16	84774123;84801570;84806835;84809344;84812899;84815169;84816266;84818760;84821260;84822787	84774553;84801638;84806942;84809496;84813098;84815268;84816373;84818775;84821302;84826380	+	4822	Jam2	protein-coding	1.11756	7.35262	32.5576	3.48e-16	1.55e-14	27.2565
76938	chr2	11585439;11585834;11586867;11587721;11588928;11590689;11593408;11595331;11596629;11598052;11600619;11603085	11585728;11585906;11586965;11587794;11589091;11590830;11593464;11595428;11596795;11598168;11600756;11603199	-	1534	Rbm17	protein-coding	-1.07545	7.87129	-32.5911	3.43e-16	1.54e-14	27.2481
217866	chr12	111292972;111294894;111295056;111295739;111295948;111296209;111296380;111299083;111301810;111302014;111303830;111304972;111305666;111306442;111307779;111308108;111311487;111313327;111314424;111317459;111317908;111318436;111318629;111319978;111320964;111321471;111322803;111323007;111324984;111325960;111327416;111329139;111336026;111339821;111342026;111345532;111377097	111294232;111294964;111295161;111295856;111296065;111296293;111296477;111299682;111301872;111302230;111303911;111305111;111305802;111306547;111307856;111308197;111311566;111313421;111314572;111317564;111318032;111318541;111318873;111320088;111321206;111321604;111322922;111323173;111325063;111326208;111327616;111329232;111336174;111339916;111342109;111345623;111377718	-	6718	Cdc42bpb	protein-coding	-1.30997	7.25216	-32.4965	3.59e-16	1.58e-14	27.234
54631	chr7	30460058;30460324;30460614;30460904;30461516;30461974;30462602;30462815;30463152;30463512;30463778;30465466;30465752;30466009;30467220;30467441;30467903;30470590;30470848;30471092;30474277;30474471;30477859;30481381;30481642;30481741;30481977;30482465;30486585;30486839	30460243;30460539;30460736;30461032;30461597;30462077;30462729;30462986;30463309;30463656;30463902;30465652;30465881;30466181;30467360;30467581;30468024;30470761;30471004;30471243;30474388;30474652;30477915;30481500;30481666;30481816;30482070;30482580;30486749;30488609	+	5661	Nphs1	protein-coding	3.4754	3.39631	32.4374	3.69e-16	1.61e-14	27.2296
73712	chr7	30763756;30764516;30764791;30765051;30765267;30766473;30767160;30767380;30769715;30771033;30771226;30771698;30775328;30776079;30776405;30777608;30777762;30778201;30779678;30779833;30780740	30764301;30764692;30764847;30765101;30765473;30766517;30767222;30767430;30769762;30771092;30771273;30771745;30775384;30776123;30776498;30777655;30777809;30778269;30779704;30779880;30781066	+	2164	Dmkn	protein-coding	-3.32053	3.21124	-32.5623	3.47e-16	1.55e-14	27.2269
14725	chr2	69424335;69425971;69428593;69430263;69431075;69431917;69432183;69433002;69435003;69436568;69437423;69438342;69439772;69441286;69442746;69443680;69448115;69451262;69453792;69454810;69455460;69456823;69458372;69459474;69460341;69461257;69464574;69465589;69466205;69466765;69469373;69472346;69475380;69477010;69478572;69479099;69480016;69481125;69482225;69482697;69482993;69486164;69487823;69489135;694…	69425803;69426042;69428721;69430364;69431204;69432034;69432250;69433092;69435122;69436744;69437643;69438470;69439937;69441429;69442877;69443811;69448243;69451384;69453929;69454926;69455576;69456942;69458500;69459719;69460537;69461434;69464797;69465759;69466357;69467281;69469668;69472547;69475511;69477132;69478697;69479341;69480219;69481414;69482383;69482862;69483913;69486352;69488062;69489348;694…	-	15467	Lrp2	protein-coding	-1.57829	7.8846	-32.5319	3.53e-16	1.56e-14	27.2197
71492	chr3	36573143;36575294;36575545;36575743;36578396;36582626;36590652;36592365;36594368;36598266;36599339;36602829;36604406;36605684;36607521;36610180;36610566;36612012;36613250	36573622;36575417;36575648;36575852;36578560;36582765;36590717;36592439;36594560;36598368;36599423;36602959;36604522;36605756;36607707;36610355;36610628;36612077;36613389	-	2598	Bbs7	protein-coding	-2.26	4.97874	-32.0497	4.48e-16	1.87e-14	27.1999
22415	chr11	103774175;103808150;103811328;103812281;103816077	103774348;103808391;103811593;103812768;103818021	+	3115	Wnt3	protein-coding	-5.27399	2.62598	-34.6291	1.3e-16	7.49e-15	27.1998
627214	chr7	134881908;134899146;134917643;134937712	134884591;134899217;134918804;134938430	-	4637	Fam196a	protein-coding	-3.25231	3.04513	-32.6035	3.41e-16	1.54e-14	27.1939
51793	chr17	35059035;35060103;35060603;35060833;35061005;35061476;35061791	35059272;35060461;35060702;35060906;35061124;35061625;35062099	+	1350	Ddah2	protein-coding	2.05957	4.92804	32.038	4.5e-16	1.87e-14	27.191
11867	chr5	145114256;145121657;145122532;145123569;145124587;145125578;145125891;145126727;145127636;145127821	145114341;145121739;145122636;145123791;145124694;145125784;145125966;145126932;145127726;145128186	+	1551	Arpc1b	protein-coding	1.35777	6.41723	32.3035	3.95e-16	1.68e-14	27.1909
14815	chr18	39410545;39415696;39420576;39421407;39422488;39424383;39428617;39485998	39414634;39415853;39420706;39421551;39422763;39424499;39428780;39487245	-	6329	Nr3c1	protein-coding	-1.57967	5.55857	-32.1418	4.28e-16	1.8e-14	27.1873
26390	chr2	119972699;119998482;120010743;120011002;120011933;120012593;120012912;120013619;120014623;120015343;120015693;120016780;120017140;120017581;120017756;120018299;120018488;120018922;120019226;120019552;120019878;120021084;120021731;120022090;120022337;120022696;120023032;120023543;120024518;120025104	119973168;119998573;120010805;120011059;120012103;120012730;120013094;120013779;120014812;120015489;120015868;120016871;120017265;120017651;120017877;120018374;120018599;120018985;120019360;120019688;120019933;120021320;120021897;120022235;120022531;120022780;120023315;120024139;120024603;120027403	+	6937	Mapkbp1	protein-coding	-2.0915	5.05287	-32.0113	4.56e-16	1.89e-14	27.1728
12827	chr8	11312829;11313419;11313630;11354277;11398662;11399704;11401148;11402163;11402984;11403342;11404964;11406813;11408052;11408882;11409422;11410055;11413979;11414742;11415364;11415926;11420577;11421168;11423552;11423717;11425339;11425929;11427007;11427553;11429307;11431240;11433654;11434628;11437587;11437924;11438354;11438555;11438947;11439306;11440379;11441222;11441880;11443071;11443317;11443556;114…	11313114;11313507;11313684;11354357;11398796;11399748;11401264;11402234;11403019;11403404;11404999;11406854;11408144;11408917;11409472;11410099;11414032;11414808;11415474;11416075;11420669;11421322;11423624;11423823;11425540;11425988;11427063;11427660;11429528;11431401;11433824;11434771;11437709;11438105;11438417;11438629;11439054;11439413;11440450;11441347;11441996;11443232;11443415;11443702;114…	+	6426	Col4a2	protein-coding	-1.82263	7.16291	-32.3364	3.88e-16	1.67e-14	27.1648
57260	chr14	55761428;55761908	55761544;55763229	+	1439	Ltb4r2	protein-coding	-3.77441	3.45756	-32.3774	3.81e-16	1.64e-14	27.1635
14387	chr11	119267967;119270088;119272870;119273975;119274215;119274641;119274856;119275060;119276842;119277501;119277694;119278265;119278876;119280412;119281113;119283174;119283660;119284059;119284447;119285005	119268222;119270678;119273015;119274140;119274311;119274760;119274974;119275191;119276952;119277614;119277778;119278382;119279009;119280563;119281261;119283315;119283812;119284223;119284599;119285698	+	3797	Gaa	protein-coding	-1.6634	7.26316	-32.3244	3.91e-16	1.67e-14	27.1496
69635	chr13	60601947;60602211;60602425;60696231;60716678;60718014;60718302;60718437;60719610;60720111;60721774;60723020;60725297;60725816;60726562;60728428;60729377;60730825;60736244;60740055;60748101;60749193;60751131;60752214;60754109;60757349;60760635	60602110;60602259;60602596;60696452;60716816;60718143;60718350;60718463;60719762;60720156;60721863;60723112;60725416;60725914;60726660;60728526;60729574;60731022;60736342;60740132;60748323;60749381;60751328;60752352;60754229;60757537;60763186	+	5935	Dapk1	protein-coding	-1.30074	6.58198	-32.2179	4.12e-16	1.75e-14	27.136
69291	chr15	83353847;83363820;83365029;83366990	83358950;83363928;83365510;83367297	-	6003	1700001L05Rik	ncRNA	1.46931	5.81404	32.0923	4.38e-16	1.84e-14	27.1348
102607	chr9	30427329;30432235;30433330;30433536;30435812;30436775;30437350;30440096;30462231;30463220;30464286	30429256;30432373;30433430;30433655;30435942;30436871;30437530;30440225;30462415;30463307;30466726	+	5541	Snx19	protein-coding	-2.02174	4.53813	-31.8685	4.9e-16	2.01e-14	27.126
80886	chr11	69673110;69674047;69674202;69674469;69677090;69677973;69678137;69678622;69678822;69680143;69681663;69681989	69673636;69674097;69674285;69674606;69677167;69678020;69678284;69678733;69679061;69680850;69681970;69682084	-	2538	Senp3	protein-coding	1.19412	7.89172	32.3442	3.87e-16	1.67e-14	27.1208
244631	chr8	105900474;105912620;105929651	105900540;105913646;105931802	+	3246	Pskh1	protein-coding	-1.45331	5.97111	-32.0705	4.43e-16	1.86e-14	27.1124
26424	chr1	136843584;136882264;136890683;136940409;136943287;136944959;136948722;136952102;136953494;136960227	136845710;136882411;136890802;136941049;136943428;136945077;136948859;136952164;136953630;136960448	-	3857	Nr5a2	protein-coding	1.47873	5.40693	31.9778	4.64e-16	1.91e-14	27.112
80876	chr7	140954839;140955670	140955173;140955961	-	627	Ifitm2	protein-coding	1.23671	6.91793	32.2138	4.13e-16	1.75e-14	27.1074
22151	chr13	34074278;34076178;34076549;34077873	34075528;34076288;34076657;34078008	-	1607	Tubb2a	protein-coding	1.597	5.97388	32.0563	4.46e-16	1.86e-14	27.1052
218232	chr13	48577872;48580755;48583085;48585932;48589120;48590287;48590626;48592486;48606273;48625377	48579843;48580865;48583270;48587178;48589257;48590405;48590706;48592657;48606360;48625573	-	4311	Ptpdc1	protein-coding	-1.78173	4.56122	-31.8086	5.05e-16	2.06e-14	27.0923
75665	chr5	115649286;115651819;115655901;115662700;115663707;115670154;115673080;115724541;115731122	115649569;115651939;115656031;115662918;115663886;115670300;115673196;115724756;115731559	-	1853	Ccdc64	protein-coding	-1.77013	5.02299	-31.8616	4.92e-16	2.01e-14	27.0921
110326	chr4	152027914;152030784;152031321;152031913;152034610;152038193	152028997;152030904;152031533;152032674;152034916;152038490	-	2785	Tas1r1	protein-coding	-2.61817	4.19895	-31.7499	5.2e-16	2.1e-14	27.0689
56441	chr9	107580170;107582817	107580935;107584048	+	1998	Nat6	protein-coding	-2.13054	4.70933	-31.7403	5.22e-16	2.1e-14	27.0557
56489	chr1	131254602;131256887;131257117;131257901;131259182;131260006;131263273;131265639;131265875;131269801;131270018;131270186;131270887;131271763;131272108;131273371;131273641;131275150;131275707;131276468;131278699;131279331	131255338;131256958;131257223;131257997;131259283;131260045;131263349;131265754;131265950;131269887;131270109;131270250;131271083;131271942;131272218;131273531;131273822;131275279;131275847;131276578;131278787;131279563	-	3203	Ikbke	protein-coding	-2.19884	4.1346	-31.7187	5.28e-16	2.12e-14	27.0554
218442	chr13	92611138;92661018;92682755;92683356;92685145;92688619;92690944;92693472;92701677;92705511;92706140;92707993	92611287;92661185;92682936;92683438;92685238;92688830;92691039;92693598;92701743;92705550;92706284;92711947	+	5319	Serinc5	protein-coding	-1.84382	5.13636	-31.7679	5.15e-16	2.09e-14	27.0371
226518	chr1	152955101;153073797;153074673;153076909;153086337;153088784;153090497;153094037;153112142;153112380;153115568	152955193;153073885;153074740;153076987;153086463;153088864;153090541;153094113;153112243;153112447;153119261	+	4523	Nmnat2	protein-coding	1.69388	5.20508	31.7658	5.16e-16	2.09e-14	27.0248
330662	chr7	134670687;134724330;134730018;134734050;134737630;134740986;134744204;134744950;134746429;134746908;134753362;134756877;134760812;134763849;134765220;134766191;134771467;134772292;134777395;134782349;134782747;134789151;134804542;134848142;134851497;134874058;134876220;134990522;134999224;135077135;135081818;135091374;135098733;135108435;135108706;135113848;135115290;135118908;135132989;135133859…	134670844;134724413;134730058;134734105;134737726;134741134;134744339;134745107;134746510;134747043;134753434;134756956;134760937;134763973;134765318;134766263;134771570;134772475;134777492;134782438;134782847;134789285;134804650;134848212;134851603;134874185;134876315;134990623;134999318;135077213;135081918;135091432;135098881;135108520;135108862;135113888;135115380;135119027;135133078;135133963…	+	6815	Dock1	protein-coding	-1.55665	6.04946	-31.8963	4.83e-16	1.99e-14	27.0183
16520	chr15	79483714;79505196	79485819;79505241	-	2152	Kcnj4	protein-coding	-2.69739	3.85602	-31.6552	5.45e-16	2.17e-14	26.9984
12832	chr1	45374331;45376639;45378307;45380000;45382116;45383167;45383591;45384400;45384962;45386833;45388213;45389372;45390032;45391076;45391662;45391824;45392304;45392815;45393053;45394382;45394721;45396061;45396450;45400821;45402079;45403116;45403260;45403421;45404201;45404733;45405240;45406240;45406544;45407022;45407233;45407702;45411434;45413470;45414748;45416927;45417588;45418499;45421221;45421944;454…	45376230;45376878;45378494;45380291;45382223;45383220;45383698;45384453;45385069;45386886;45388320;45389479;45390193;45391129;45391715;45391931;45392357;45392868;45393106;45394435;45394828;45396159;45396494;45400874;45402132;45403169;45403313;45403519;45404254;45404831;45405293;45406347;45406597;45407120;45407277;45407800;45411487;45413514;45414801;45416971;45417641;45418552;45421274;45421997;454…	-	6615	Col5a2	protein-coding	-2.17506	4.2308	-31.5641	5.71e-16	2.24e-14	26.9789
14115	chr6	91212764;91233063;91250858;91252444;91254441;91256235;91256880;91257725;91259630;91263339;91264699;91265718;91265956;91266315;91268538;91269088;91269964;91271522	91212900;91234351;91250969;91252573;91254621;91256444;91256993;91257826;91259770;91263473;91264836;91265861;91266084;91266440;91268654;91269216;91270087;91272540	+	4477	Fbln2	protein-coding	-2.17915	4.06943	-31.5542	5.74e-16	2.25e-14	26.9718
237831	chr11	72241994;72245126;72247667;72250726;72252258;72253184;72257360;72258958;72260195;72261613;72262023;72266464	72243636;72245263;72247828;72250844;72252358;72253402;72257482;72259126;72260382;72261749;72262151;72266604	-	3269	Slc13a5	protein-coding	2.20456	4.09492	31.5023	5.89e-16	2.3e-14	26.9469
26936	chr11	59662495;59696126;59696958;59727552;59731508;59735830;59737072;59741120;59741991;59743771;59744752;59748547;59749519;59752490;59754993;59764380;59765408;59766728;59767955;59769213;59769884;59771617;59772152;59775516	59662948;59696203;59697023;59727703;59731592;59736064;59737228;59741261;59742098;59743827;59744820;59748636;59749628;59753060;59755109;59764527;59765525;59766887;59768074;59769299;59770046;59771702;59772217;59780860	+	8784	Mprip	protein-coding	-1.27701	7.94357	-31.984	4.62e-16	1.91e-14	26.933
102623	chr9	27352685	27357546	+	4862	AI414108	ncRNA	-2.08572	4.70714	-31.4932	5.92e-16	2.3e-14	26.9291
74769	chr9	99038402;99040921;99042524;99044745;99046547;99052305;99053971;99055342;99060185;99061731;99062837;99064020;99065560;99070241;99071348;99073579;99088605;99090150;99093043;99094440;99101175;99105531;99122284;99139991	99039850;99041053;99042669;99044868;99046714;99052383;99054080;99055520;99060284;99061874;99062958;99064208;99065610;99070371;99071444;99073830;99088682;99090320;99093222;99094663;99101400;99105717;99122376;99140211	-	4854	Pik3cb	protein-coding	-1.39001	6.11715	-31.6808	5.38e-16	2.14e-14	26.8972
19724	chr8	84066836;84073731;84079863;84080125;84081115;84082648;84084082;84085573;84087706;84090111;84090950;84091366;84092535;84092780;84092974;84093203;84094727;84094950;84095396;84095628;84095797	84067048;84074069;84079972;84080208;84081222;84082761;84084174;84085667;84088072;84090292;84091069;84091478;84092653;84092889;84093125;84093300;84094876;84095158;84095549;84095673;84096992	+	4172	Rfx1	protein-coding	-2.21088	5.41429	-31.4724	5.98e-16	2.31e-14	26.8721
63959	chr17	45585200;45586094;45587228;45587562;45588289;45588996;45589208;45589414;45589681;45589923;45590257;45592179;45593332;45593556;45595482;45595878;45599473	45585782;45586305;45587313;45587670;45588386;45589074;45589305;45589548;45589820;45590125;45590338;45592393;45593432;45593640;45595572;45595902;45599603	-	2473	Slc29a1	protein-coding	1.28091	6.77227	31.7369	5.23e-16	2.1e-14	26.8709
69101	chr16	17146967;17147233;17147598;17147797;17148156	17147146;17147392;17147697;17147974;17148857	+	1320	Ydjc	protein-coding	1.67308	4.86095	31.4155	6.15e-16	2.36e-14	26.8706
20425	chr11	60788897;60789596;60790146;60792949;60794836;60797525;60798594;60801428;60801916;60804263;60806946;60810904	60789316;60789706;60790262;60793071;60794952;60797737;60798675;60801588;60802031;60804408;60807042;60811265	-	2065	Shmt1	protein-coding	1.17632	6.85034	31.7063	5.31e-16	2.12e-14	26.8481
74155	chr4	150855091;150865075;150865364;150866316	150855271;150865269;150865440;150868880	+	3018	Errfi1	protein-coding	-1.56093	5.92295	-31.4756	5.97e-16	2.31e-14	26.8109
50754	chr3	84815577;84863964;84864137;84890095;84903501;84952211;84954875;84958504;84965248;84967440;84969165;84970796;84972375;84974403;84976174;84977273	84815769;84864011;84864200;84890252;84904079;84952639;84954957;84958645;84965382;84967563;84969301;84970909;84972556;84974628;84976384;84979198	+	4751	Fbxw7	protein-coding	-1.27833	6.75831	-31.5866	5.64e-16	2.22e-14	26.7953
77832	chr5	114707779;114708654;114709307;114711253;114713424;114714628;114715553;114715835;114717437;114718379;114719579;114720125;114721108	114707960;114708838;114709517;114711309;114713492;114714801;114715665;114715901;114717609;114718460;114719764;114720268;114722327	+	2863	Tchp	protein-coding	-1.72534	5.02876	-31.2794	6.6e-16	2.49e-14	26.791
217882	chr12	112722174;112724624;112731351;112732005;112732500;112733392;112735161;112735352;112736156;112737158;112737574;112737839;112740774;112742953;112743403;112743670;112744070;112744523;112744665	112722382;112724755;112731440;112732083;112732558;112733530;112735265;112735825;112736868;112737331;112737664;112739509;112741011;112743112;112743546;112743758;112744163;112744574;112746591	+	6640	Cep170b	protein-coding	-1.6632	7.49237	-31.6318	5.52e-16	2.19e-14	26.7762
84035	chr11	5191552;5198310;5199502;5201697;5209939;5215407;5238411;5243775;5261435	5195121;5198394;5199711;5202029;5210092;5215531;5238502;5243937;5261610	-	4908	Kremen1	protein-coding	-1.67824	6.07246	-31.4174	6.15e-16	2.36e-14	26.7703
19281	chr2	161527623;161530437;161533481;161534469;161547284;161551747;161553730;161555414;161558820;161560169;161564627;161566125;161575726;161587547;161607258;161656142;161697974;161732879;161766224;161810550;161811935;161901448;161927482;162135212;162238007;162253753;162267988;162278048;162362901;162660800	161529569;161530572;161533644;161534594;161547415;161551920;161553879;161555549;161558974;161560285;161564724;161566161;161575802;161587634;161607448;161656290;161698109;161732915;161766497;161810652;161812136;161901557;161927778;162135505;162238181;162253868;162268069;162278319;162363026;162661147	-	6449	Ptprt	protein-coding	-4.75804	2.2632	-33.6495	2.06e-16	1.05e-14	26.769
14077	chr4	130308778;130312291;130313954;130315172	130308850;130312463;130314055;130315463	+	640	Fabp3	protein-coding	-1.32774	7.45215	-31.5367	5.79e-16	2.26e-14	26.7251
218454	chr13	94057796;94120777;94174023;94191848	94057906;94120835;94174638;94195409	+	4348	Lhfpl2	protein-coding	-2.66728	3.49457	-31.1494	7.05e-16	2.65e-14	26.7025
15162	chr2	153108468;153124170;153128263;153129043;153129844;153131221;153134069;153134624;153136698;153138262;153144419;153148947;153150947	153108754;153124287;153128305;153129142;153129942;153131324;153134218;153134776;153136877;153138338;153144572;153149078;153151441	+	2092	Hck	protein-coding	1.68722	4.59532	31.0361	7.47e-16	2.79e-14	26.6913
59027	chr12	32820335;32830167;32833032;32834902;32838299;32839151;32840925;32842685;32846706;32848617;32850423	32820626;32830323;32833135;32835030;32838457;32839287;32841150;32842804;32846846;32848751;32853369	+	4547	Nampt	protein-coding	1.56996	6.48154	31.3071	6.5e-16	2.47e-14	26.6725
19143	chr9	31088590;31090402;31091337;31095535;31096475;31096854;31097073;31097557;31100140;31100386;31102876;31103686;31106014;31106489;31106717;31107904;31108155;31108571;31131546	31090027;31090538;31091611;31095721;31096597;31096967;31097183;31097661;31100270;31100495;31102973;31103825;31106254;31106524;31106874;31107974;31108282;31108730;31131799	-	4017	St14	protein-coding	-1.45584	7.55086	-31.4083	6.18e-16	2.36e-14	26.653
53859	chr11	103219764;103221499;103224246;103225034;103225290;103226987;103227532;103230332;103231032;103231357;103237498;103238932;103239632;103241037;103242115;103267338	103221189;103221599;103224390;103225140;103225622;103227137;103227695;103230436;103231163;103231486;103237635;103239552;103239842;103241106;103242389;103267401	-	4173	Map3k14	protein-coding	-2.12481	3.98914	-30.8794	8.1e-16	2.98e-14	26.6284
12048	chr2	152780668;152829427;152831603	152782282;152830102;152831682	-	2371	Bcl2l1	protein-coding	-1.09288	7.01981	-31.3026	6.52e-16	2.47e-14	26.6254
12799	chr11	100574939;100575891;100578913;100580347	100575068;100576905;100579052;100581739	+	2678	Cnp	protein-coding	1.53683	5.25034	30.9773	7.7e-16	2.85e-14	26.6072
70218	chr11	102905518;102906496;102906996;102908113;102908887;102912354;102912920;102913450;102913684;102914250;102914539;102914815;102915150;102915543;102916189;102924983	102906276;102906581;102907076;102908638;102909092;102912469;102913088;102913550;102913758;102914426;102914736;102914925;102915254;102915700;102916515;102925124	-	3337	Kif18b	protein-coding	-1.05204	7.46658	-31.3154	6.48e-16	2.46e-14	26.6054
16414	chr10	77530348;77541966;77542398;77546013;77547126;77548546;77549946;77550973;77556088;77557390;77557952;77559479;77560150;77561013;77564638;77565178	77530459;77542026;77542486;77546193;77547296;77548787;77550101;77551068;77556177;77557530;77558139;77559723;77560372;77561215;77564804;77565674	+	2862	Itgb2	protein-coding	-3.79384	3.01852	-31.4734	5.98e-16	2.31e-14	26.5818
109145	chr8	23226610;23227249;23229416;23229606;23232605;23234754;23236980;23237470	23227175;23227339;23229504;23229703;23232718;23234840;23237099;23237668	-	1364	Gins4	protein-coding	1.36818	6.16191	31.0576	7.39e-16	2.77e-14	26.5627
27055	chr6	56832059;56849638;56850563;56851362;56856233;56860656;56868720;56873367;56875669;56878034	56832427;56849783;56850752;56851507;56856422;56860801;56868906;56873512;56875832;56879360	+	3011	Fkbp9	protein-coding	-1.01763	7.87799	-31.2631	6.65e-16	2.5e-14	26.5564
68567	chr5	30933143;30934160;30934379;30934543;30935878;30945358	30933988;30934281;30934449;30934608;30935980;30945480	-	1331	Cgref1	protein-coding	-1.38495	5.32114	-30.89	8.05e-16	2.97e-14	26.554
12575	chr17	29090986;29093772;29098397;29099344	29091101;29093861;29098837;29100722	+	2026	Cdkn1a	protein-coding	-1.5799	6.26552	-30.9769	7.7e-16	2.85e-14	26.5185
217718	chr12	85299514;85303467;85305463;85306137;85307930;85308819;85310387;85311338;85312946;85314182;85314402;85315580;85320714;85322029;85325308;85327389;85329844;85332501;85333986;85334598;85336308;85339003	85301926;85303673;85305624;85306366;85307989;85308989;85310548;85311446;85313101;85314228;85314602;85315724;85320906;85322079;85325372;85327499;85329975;85332606;85334056;85334653;85336485;85339362	-	5386	Nek9	protein-coding	-1.23456	6.22212	-30.975	7.71e-16	2.85e-14	26.5135
56494	chr11	103676849;103683792;103686582;103687525;103689255;103697630	103679397;103683932;103686714;103687633;103689319;103697710	-	3078	Gosr2	protein-coding	-1.21026	6.31577	-30.9755	7.71e-16	2.85e-14	26.5054
68239	chr11	100262882;100263294;100264478;100264929;100265600;100266935;100267200;100269410	100263167;100263343;100264698;100265054;100265761;100267091;100267282;100269871	-	1547	Krt42	protein-coding	4.25304	2.84614	31.6118	5.57e-16	2.2e-14	26.4981
270198	chr9	108991902;108998859;108999113;109005572;109007284;109007692;109008349;109010449;109011158;109025047;109027520;109027745;109028894;109030329	108992112;108998975;108999209;109005638;109007358;109007748;109008470;109010656;109011304;109025151;109027649;109027807;109028958;109032225	+	3361	Pfkfb4	protein-coding	-1.93811	4.15782	-30.6116	9.3e-16	3.33e-14	26.4909
239552	chr15	77748613;77752799;77753244;77755188	77750216;77752925;77753308;77755229	-	1838	Apol8	protein-coding	-2.9839	3.2038	-30.872	8.13e-16	2.98e-14	26.4772
70021	chr14	31134853;31135030;31135338;31135494;31135686;31135918;31136065;31136268;31136596;31138124;31138332;31138609;31138781	31134923;31135104;31135393;31135587;31135814;31135978;31136167;31136369;31136677;31138210;31138472;31138673;31139124	+	1410	Nt5dc2	protein-coding	1.57917	5.95634	30.8494	8.22e-16	3.01e-14	26.4746
13644	chr14	54916543;54919329;54919695;54920505;54920903;54925438	54917532;54919418;54920414;54920645;54921181;54926788	-	3571	Efs	protein-coding	-1.62951	5.61148	-30.7738	8.55e-16	3.11e-14	26.471
22034	chr2	101678440;101680825;101684479;101688464;101690056;101691428;101694255;101696663	101678620;101681027;101684796;101688614;101690214;101691499;101694332;101700976	+	5476	Traf6	protein-coding	-1.5335	4.98935	-30.5797	9.46e-16	3.38e-14	26.4221
69660	chr1	74288247;74289871;74290752;74291200;74291431;74291695;74292457;74292835;74293005;74293908;74295198;74304123	74289518;74289924;74290847;74291287;74291468;74291734;74292507;74292888;74293069;74294002;74295439;74304336	-	2309	Tmbim1	protein-coding	-1.26346	5.87799	-30.7417	8.7e-16	3.15e-14	26.4201
22437	chr9	120013755;120016426;120023434	120016034;120019819;120023598	-	5839	Xirp1	protein-coding	-3.31907	3.20124	-30.821	8.35e-16	3.05e-14	26.4146
23882	chr13	51846675;51847352;51847556;51847869	51846832;51847453;51847769;51848475	+	1081	Gadd45g	protein-coding	-2.88734	3.90348	-30.4753	9.99e-16	3.54e-14	26.4043
235281	chr9	40269216;40277068;40279375;40282424;40288374	40270047;40277231;40279600;40282562;40291618	+	4606	Scn3b	protein-coding	-1.92956	4.75466	-30.4628	1.01e-15	3.55e-14	26.3859
18858	chr11	63131510;63133125;63134421;63151119;63158252	63131654;63133244;63134520;63151259;63159546	+	1801	Pmp22	protein-coding	-2.19765	3.99343	-30.3229	1.08e-15	3.8e-14	26.3402
76843	chr1	191537365;191540704;191546491;191548296;191552988;191556441;191556784;191558061;191561425;191563111;191568291;191568495;191569667;191570579;191575349	191539341;191541536;191546623;191548385;191553100;191556545;191556887;191558134;191561537;191563176;191568411;191568556;191569765;191570704;191575534	-	4202	Dtl	protein-coding	1.72697	6.44537	30.637	9.18e-16	3.31e-14	26.3213
53424	chr8	125012997;125013510;125015655;125024507;125028768;125032497	125013212;125013614;125015769;125024637;125028895;125034192	+	2391	Tsnax	protein-coding	-1.25368	6.30379	-30.6143	9.29e-16	3.33e-14	26.3135
56857	chr9	37229149;37233053;37233310;37233620;37233842;37234158;37234393;37235085;37235481;37236879;37237300;37237737;37238216;37239131;37239619;37241092;37241289;37241879;37255299	37231656;37233109;37233374;37233717;37233920;37234231;37234441;37235170;37235543;37236969;37237452;37237774;37238382;37239207;37239754;37241170;37241382;37241960;37255738	-	4436	Slc37a2	protein-coding	-1.62926	4.62089	-30.3033	1.09e-15	3.82e-14	26.3045
320661	chr5	36600485;36604511;36607938;36613246;36618743;36619664;36629657;36672748;36695855	36602803;36604608;36608046;36616534;36618824;36619730;36629791;36673242;36695969	-	6709	D5Ertd579e	protein-coding	-1.38631	5.79798	-30.5041	9.84e-16	3.49e-14	26.3026
13924	chr1	135108498;135108919;135109286;135109563;135109809;135110085;135110252;135110413;135110650;135111046;135111302;135112190;135112890;135114110;135114301;135114542;135116384;135116519;135118114;135118662;135119229;135119666;135120257;135120702;135122332;135123539;135123948;135124295;135125243;135125705;135126136;135126577;135127016;135128037;135128654;135129117;135132520	135108695;135109054;135109449;135109679;135109937;135110161;135110330;135110500;135110717;135111181;135111462;135112312;135113024;135114186;135114391;135114635;135116431;135116645;135118181;135118872;135119369;135119947;135120523;135120965;135122604;135123814;135124193;135124549;135125506;135125974;135126408;135126625;135127082;135128113;135128721;135129750;135132575	-	6089	Ptprv	protein-coding	-1.39366	5.99872	-30.5063	9.83e-16	3.49e-14	26.2853
18999	chr17	35506032;35508807;35509103;35509408;35509981;35510288	35506483;35508896;35509223;35509538;35510139;35510777	+	1443	Pou5f1	protein-coding	1.17351	8.14311	30.7504	8.66e-16	3.14e-14	26.2691
114663	chr18	67289223;67302176;67306671;67309052;67310647;67315620;67316882;67318395	67289506;67302309;67306775;67309097;67310755;67315728;67317033;67318841	+	1386	Impa2	protein-coding	1.35694	5.92488	30.406	1.04e-15	3.65e-14	26.2342
50523	chr14	57689662;57694314;57696120;57696916;57699258;57702922;57722189;57733878;57745890	57691770;57694420;57696302;57697498;57700558;57703054;57722551;57734418;57746123	-	5554	Lats2	protein-coding	-1.84084	5.29309	-30.2223	1.14e-15	3.98e-14	26.2107
22596	chr1	72307421;72310435;72312408;72314154;72315459;72318999;72325074;72326216;72329926;72334636;72338960;72339989;72343009;72346228;72354243;72356817;72381619;72383358;72383702;72393896;72394708	72307567;72310548;72312591;72314202;72315581;72319190;72325188;72326354;72330038;72334698;72339097;72340079;72343142;72346424;72354336;72356886;72381728;72383454;72383769;72393967;72394953	+	2556	Xrcc5	protein-coding	1.14625	7.28289	30.5225	9.74e-16	3.48e-14	26.1899
208285	chr17	32506462;32506894;32517894;32520363;32520503;32522118;32524002;32524579;32524835;32527841;32528047;32528276;32528717	32506578;32507092;32518038;32520416;32520630;32522239;32524272;32524645;32524964;32527974;32528111;32528358;32528894	+	1693	Cyp4f17	protein-coding	-1.82338	4.52285	-30.0622	1.24e-15	4.28e-14	26.1851
15574	chr11	8993142;8998637;9000077;9005989;9007494;9010241;9010497;9011059	8996932;8998756;9000176;9006063;9007604;9010417;9010624;9011137	-	4581	Hus1	protein-coding	1.55283	5.26278	30.1774	1.17e-15	4.06e-14	26.1786
54324	chr6	43265644;43272305;43275940;43276537;43276804;43279443;43280161;43280598;43280951;43281423;43283174;43283893;43285359;43287540;43288614	43265743;43275425;43275997;43276598;43277057;43279603;43280313;43280727;43281025;43281512;43283331;43284054;43285429;43287644;43289320	+	5407	Arhgef5	protein-coding	-1.85013	4.57595	-30.0272	1.26e-15	4.35e-14	26.1633
77097	chr11	105589986;105625035;105673420;105713382;105776806;105779939;105798561;105810472;105834949;105840619;105857397;105863917;105867167;105886358;105895846;105896468;105899684;105902060;105908995;105910203;105912912;105913357;105914892;105916914;105919951;105921748	105590249;105625124;105673491;105713453;105776954;105780125;105798824;105810597;105835230;105840752;105857628;105864083;105867774;105886466;105895968;105896704;105899869;105902153;105909128;105910326;105913087;105913489;105914983;105917060;105920051;105929304	+	11860	Tanc2	protein-coding	-1.60706	5.40745	-30.1662	1.17e-15	4.08e-14	26.163
18746	chr9	59656368;59665200;59665863;59668549;59668913;59670467;59671575;59671921;59675029;59675568;59678044;59678728	59656649;59665366;59665954;59668680;59669099;59670737;59671725;59672073;59675195;59675734;59678225;59679375	+	2599	Pkm	protein-coding	1.04181	11.1713	30.7188	8.8e-16	3.18e-14	26.1279
19672	chr2	105385948;105388977;105391970;105393589;105394679;105398970	105388026;105389176;105392030;105393767;105394872;105399319	-	3063	Rcn1	protein-coding	1.52239	5.44101	30.0606	1.24e-15	4.28e-14	26.0972
77574	chr6	42672547;42675042;42676791;42677330;42678070;42678426;42686325;42692933	42673638;42675379;42677030;42677543;42678167;42679420;42686958;42693059	-	3738	Tcaf1	protein-coding	-1.83615	4.30528	-29.871	1.37e-15	4.62e-14	26.0938
17288	chr18	21072344;21074922;21075651;21076347;21080430;21084079;21086162;21088545;21089325;21091074;21093221;21094924;21096129;21097288;21100044	21072436;21074940;21075701;21076387;21080508;21084196;21086340;21088763;21089477;21091289;21093664;21095103;21096261;21097492;21100199	+	2286	Mep1b	protein-coding	2.84707	3.57431	29.9232	1.34e-15	4.56e-14	26.0929
19193	chr11	77880615;77881501;77882118;77882617;77883129;77883779;77892112;77893667	77881254;77881576;77882276;77882763;77883311;77883992;77892260;77893872	-	1774	Pipox	protein-coding	2.06166	4.26372	29.833	1.4e-15	4.7e-14	26.0763
14120	chr13	62836885;62840271;62841786;62849377;62853974;62854904;62858128	62837280;62840390;62841923;62849517;62854066;62855066;62858370	-	1294	Fbp2	protein-coding	-1.62698	5.11413	-29.9403	1.32e-15	4.53e-14	26.0686
78625	chr17	56875633;56876088;56877363;56880451;56880946;56882167;56882541;56882780;56883316;56883627;56884751;56885084;56886441;56888637	56875680;56876396;56877589;56880539;56881066;56882247;56882690;56882986;56883497;56883860;56884968;56885223;56886687;56888838	+	2455	1700061G19Rik	protein-coding	1.97318	4.44358	29.7968	1.43e-15	4.77e-14	26.0471
15530	chr4	137468803;137501059;137502276;137507801;137508010;137508304;137510542;137510907;137511246;137511842;137512103;137512339;137512630;137514611;137515294;137515558;137515860;137516776;137517201;137517365;137517583;137518383;137518633;137518916;137519186;137519666;137519882;137520087;137520510;137521443;137521739;137522033;137522459;137528805;137529163;137529343;137531624;137533432;137533665;137535124…	137468924;137501194;137502320;137507910;137508068;137508464;137510670;137511161;137511365;137511973;137512247;137512490;137512776;137514774;137515473;137515754;137516007;137516903;137517287;137517423;137517650;137518523;137518809;137519095;137519304;137519777;137519995;137520214;137520596;137521492;137521833;137522173;137522650;137528897;137529243;137529573;137531737;137533559;137533751;137535182…	+	14177	Hspg2	protein-coding	-1.94161	8.14219	-30.3164	1.09e-15	3.81e-14	26.0371
69259	chr17	24047720;24055925;24057741;24059222;24060243;24073177	24049444;24056050;24057836;24059313;24060351;24073485	-	2457	Kctd5	protein-coding	-1.54452	5.45906	-29.8786	1.37e-15	4.62e-14	25.9993
15903	chr4	136143822;136144294;136144880	136144178;136144376;136145392	+	953	Id3	protein-coding	-1.52708	6.06803	-29.9694	1.3e-15	4.47e-14	25.9894
20498	chr8	105943590;105944275;105944522;105945135;105945340;105945561;105945845;105946691;105947057;105947493;105947853;105949138;105949654;105950197;105950505;105950696;105951422;105951780;105953808;105955427;105955581;105959358;105960676;105965919	105944173;105944408;105944706;105945242;105945471;105945730;105946040;105946859;105947161;105947612;105947951;105949256;105949828;105950254;105950603;105950860;105951636;105952021;105953938;105955481;105955727;105959489;105960770;105966115	-	3832	Slc12a4	protein-coding	-1.43273	7.25298	-30.1155	1.21e-15	4.18e-14	25.9736
66120	chr15	98724368;98726484;98726900;98727211;98727683;98727957	98724602;98726554;98726933;98727298;98727748;98728198	-	736	Fkbp11	protein-coding	2.06687	4.28922	29.6381	1.56e-15	5.09e-14	25.9702
17702	chr13	53466881;53472332	53468593;53472780	-	2162	Msx2	protein-coding	-2.43279	3.56069	-29.6549	1.54e-15	5.06e-14	25.9638
223752	chr15	86057695;86058727;86091313;86100780;86118463;86122179;86125124;86125857;86126989;86127550;86128665;86129650;86130147;86130257;86130503;86131854;86132815;86133675;86134786;86135350	86057831;86058961;86091523;86100900;86118583;86122252;86125256;86125882;86127080;86127641;86128713;86129721;86130190;86130366;86130657;86131998;86132908;86133759;86134949;86137636	+	4447	Gramd4	protein-coding	-1.40579	5.40952	-29.7882	1.44e-15	4.78e-14	25.9513
57785	chr11	68972487;68972943;68973117;68973441;68973642	68972741;68973028;68973273;68973557;68973820	-	794	Rangrf	protein-coding	1.84046	4.37884	29.6023	1.59e-15	5.18e-14	25.9432
78801	chr12	105705982;105710145;105713503;105715985;105726187;105733433;105734890;105738574;105741009;105742236;105745204;105747186;105761468;105763953;105766554;105768530;105780850;105781671	105706266;105710336;105713611;105716079;105726297;105733513;105734978;105738664;105741086;105742385;105745332;105747315;105761596;105764021;105766751;105768750;105781008;105782447	+	3093	Ak7	protein-coding	2.3621	3.66752	29.5749	1.61e-15	5.24e-14	25.9345
171580	chr10	41476314;41478010;41478428;41478963;41479395;41479619;41480285;41481134;41481590;41481901;41482208;41482604;41483441;41483717;41484165;41484376;41484733;41484985;41485395;41485766;41486028;41486372;41486594;41486758	41476540;41478314;41478635;41479067;41479499;41479774;41480385;41481391;41481705;41482027;41482289;41482748;41483631;41483802;41484254;41484532;41484809;41485255;41485495;41485879;41486121;41486471;41486667;41487030	+	3563	Mical1	protein-coding	1.67965	4.99306	29.6757	1.52e-15	5.02e-14	25.9333
11891	chr9	73044865;73075393;73082402;73084931;73087077;73095258	73045011;73075567;73082487;73085034;73087200;73097592	+	2971	Rab27a	protein-coding	1.78084	5.03327	29.6739	1.53e-15	5.02e-14	25.9313
231717	chr5	121849028;121850470;121851168;121852551	121849124;121850546;121851279;121854599	+	2335	Fam109a	protein-coding	-1.47254	5.3868	-29.6945	1.51e-15	4.99e-14	25.9036
107581	chr4	130047840;130049633;130051655;130051817;130052852;130053254;130054146;130054349;130055137;130055467;130055990;130056943;130057993;130058297;130058426;130058551;130058957;130059310;130059442;130059732;130060224;130060448;130060874;130061345;130061602;130061712;130062057;130064864;130065040;130065374;130066181;130066606;130066993;130067219;130067486;130068362;130068483;130068685;130072255;130072826…	130048083;130049739;130051729;130051934;130052975;130053520;130054226;130054474;130055190;130055493;130056025;130056969;130058055;130058338;130058470;130058586;130059019;130059354;130059537;130059770;130060268;130060483;130060984;130061380;130061637;130061795;130062101;130064899;130065084;130065505;130066216;130066713;130067115;130067272;130067527;130068397;130068536;130068753;130072281;130072885…	+	5206	Col16a1	protein-coding	-2.91007	3.7684	-29.5179	1.66e-15	5.37e-14	25.8944
17183	chr2	164389393;164389793;164392842;164393096;164396725;164396942;164397164;164399732;164400528;164401842;164404491;164405098	164389714;164389900;164392994;164393509;164396847;164397064;164397286;164399854;164401097;164401962;164404818;164405160	-	2571	Matn4	protein-coding	-5.57353	2.60467	-31.3886	6.24e-16	2.38e-14	25.8924
11512	chr15	98589978;98592673;98593461;98594331;98594913;98595127;98596040;98596517;98596894;98597164;98597380;98597727;98598098;98598357;98598622;98598858;98599900;98600172;98600395;98600911;98603874;98607481	98592475;98592797;98593665;98594594;98595042;98595162;98596218;98596675;98597010;98597251;98597477;98597874;98598123;98598485;98598763;98599016;98600027;98600289;98600516;98601060;98604732;98607633	-	6033	Adcy6	protein-coding	-2.55385	3.96107	-29.4518	1.72e-15	5.53e-14	25.8764
14118	chr2	125300594;125303086;125306270;125308470;125309381;125309757;125312500;125312839;125314594;125315359;125316967;125317412;125318997;125320863;125321196;125321616;125324826;125328093;125328991;125330533;125332258;125335365;125338433;125341256;125342003;125342800;125343805;125344025;125345855;125346330;125348107;125350246;125351682;125351953;125358806;125360108;125361184;125362462;125362675;125363612…	125301975;125303260;125306501;125308589;125309509;125309873;125312622;125312964;125314800;125315484;125317098;125317534;125319116;125320979;125321261;125321765;125324951;125328212;125329119;125330649;125332383;125335487;125338558;125341327;125342161;125342922;125343930;125344093;125346019;125346452;125348229;125350371;125351804;125352075;125358931;125360233;125361306;125362587;125362800;125363740…	-	9900	Fbn1	protein-coding	-2.59821	3.85764	-29.4561	1.72e-15	5.53e-14	25.8749
105440	chr14	67716098;67724558;67726327;67728650;67729351;67729605;67733161;67733347;67734141;67737606;67738377;67740296	67716384;67724679;67726370;67728746;67729409;67729733;67733228;67733442;67734290;67737711;67738510;67742310	+	3307	Kctd9	protein-coding	-1.51152	4.82898	-29.5192	1.66e-15	5.37e-14	25.8611
73679	chr11	121146143;121146528;121146729	121146222;121146601;121148314	+	1740	Tex19.1	protein-coding	-1.1591	7.17917	-29.8999	1.35e-15	4.59e-14	25.8558
105450	chr14	34375504;34396165;34396372;34396559;34397547;34397830;34402913	34375778;34396293;34396478;34396639;34397720;34399623;34404287	+	3935	Mmrn2	protein-coding	-1.1594	7.2572	-29.9084	1.35e-15	4.59e-14	25.8557
67122	chr2	25180758	25183339	+	2582	Nrarp	protein-coding	-2.01815	3.97828	-29.4089	1.76e-15	5.64e-14	25.8548
56812	chr1	75236423;75236702;75237455;75239280;75239508;75240892;75241171;75241409;75243458	75236589;75236948;75237564;75239333;75239630;75240984;75241273;75241479;75245692	+	3203	Dnajb2	protein-coding	-1.89049	4.86301	-29.4966	1.68e-15	5.42e-14	25.8544
18792	chr14	20836662;20837049;20837610;20837778;20838513;20839096;20839332;20839775;20840498;20840946;20842274	20836734;20837135;20837640;20837885;20838687;20839187;20839554;20839923;20840638;20841094;20843388	+	2343	Plau	protein-coding	-2.75821	3.13683	-29.5739	1.61e-15	5.24e-14	25.8357
20524	chr15	81318921;81323610;81327041;81327217;81329050;81337936;81339974;81344101;81360677	81319776;81323692;81327136;81327362;81329166;81338087;81340040;81344161;81360765	-	1667	Slc25a17	protein-coding	-1.27178	6.90276	-29.798	1.43e-15	4.77e-14	25.8196
19275	chr1	75247041;75247837;75248102;75248726;75251751;75252256;75252468;75252771;75253012;75253260;75253923;75254585;75254779;75255125;75255627;75256843;75257293;75257945;75258379;75260571;75262027;75262323;75264004	75247620;75247910;75248166;75248779;75251917;75252375;75252545;75252844;75253159;75253460;75254141;75254649;75254858;75255211;75255901;75256880;75257424;75258296;75258637;75260667;75262140;75262373;75264208	-	3535	Ptprn	protein-coding	-2.34426	3.5804	-29.3153	1.85e-15	5.84e-14	25.7882
67749	chr3	51388412;51391226;51391825;51396228	51389323;51391319;51391928;51396547	-	1430	Mgarp	protein-coding	2.49068	3.61645	29.3033	1.86e-15	5.84e-14	25.7843
29811	chr14	51905271;51906513;51906690;51906949;51907246;51907585;51908068;51908330;51908568;51908874;51910058;51910315;51910680;51911086;51911466;51913323	51906306;51906564;51906725;51906996;51907297;51907629;51908171;51908386;51908654;51908934;51910120;51910435;51910785;51911127;51911546;51913488	-	2157	Ndrg2	protein-coding	2.51497	3.504	29.3217	1.85e-15	5.83e-14	25.784
232906	chr7	16494473;16498584;16511193;16512408;16549063;16561458;16614472	16498010;16498689;16511324;16512485;16549207;16565329;16614993	-	8393	Arhgap35	protein-coding	-1.00242	8.1726	-29.8615	1.38e-15	4.64e-14	25.7799
21676	chr7	112679320;112759384;112839416;112841888;112842040;112856053;112856798;112858154;112859069;112861432;112876075;112891719;112894312;112898547	112679726;112759639;112839480;112841950;112842102;112856064;112856932;112858200;112859130;112861556;112876248;112891859;112894464;112906805	+	9962	Tead1	protein-coding	-1.09259	7.01369	-29.7436	1.47e-15	4.87e-14	25.7791
21454	chr17	12916465;12917798;12918043;12919351;12919815;12920276;12920740;12922103;12922609;12923218;12923530;12924260	12916629;12917883;12918171;12919448;12919925;12920457;12920866;12922278;12922732;12923410;12923693;12925067	+	2363	Tcp1	protein-coding	1.31548	8.66687	29.9005	1.35e-15	4.59e-14	25.7789
103098	chr10	103367808;103369372;103389027;103393391;103393901;103394990;103400182;103404285;103404627;103408203;103409653;103416633;103418023	103368153;103369468;103389341;103393548;103394027;103395171;103400292;103404526;103404819;103408395;103409812;103416795;103419379	+	3644	Slc6a15	protein-coding	3.04415	3.55337	29.3416	1.83e-15	5.78e-14	25.7771
381591	chr4	98726754;98727395;98733143;98736446;98736946	98726840;98727470;98734078;98736747;98738486	+	2942	L1td1	protein-coding	1.22006	8.55599	29.8773	1.37e-15	4.62e-14	25.7709
100529079	chr9	103423578;103426577;103427150;103427689;103428398;103459819	103423629;103426815;103427386;103427787;103428506;103461260	+	2178	5830418P13Rik	ncRNA	-2.67903	3.75557	-29.2308	1.94e-15	5.99e-14	25.7473
22702	chr8	43295067;43300628;43304476;43306841	43296536;43300705;43304559;43307009	-	1801	Zfp42	protein-coding	1.2618	7.93123	29.7716	1.45e-15	4.81e-14	25.742
546024	chr7	15882617;15883519;15890595;15896124;15897404;15898445;15901646;15902850;15903700	15882784;15883543;15890649;15896257;15897552;15900299;15901737;15903007;15904030	+	2967	Crxos	protein-coding	1.82524	4.55645	29.2418	1.93e-15	5.97e-14	25.7337
226652	chr1	171388960;171397475;171400556;171401925;171402157;171403213;171403781;171404034;171404221;171404810;171407358;171407728	171389363;171397577;171400700;171402007;171402264;171403340;171403955;171404137;171404298;171405178;171407635;171410240	+	4488	Arhgap30	protein-coding	1.8987	4.22728	29.1828	1.99e-15	6.07e-14	25.7225
16997	chr12	84783212;84784754;84785204;84785728;84785974;84786356;84787366;84787904;84789084;84789758;84790242;84790995;84791597;84791822;84792957;84793619;84793944;84795041;84799372;84804357;84806300;84807171;84808425;84809148;84809585;84813240;84815962;84828448;84829134;84830016;84830643;84831748;84853687;84868677;84875756	84784395;84784903;84785485;84785895;84786111;84786484;84787449;84788095;84789227;84789883;84790373;84791117;84791722;84791944;84793082;84793744;84794066;84795160;84799491;84804485;84806413;84807210;84808444;84809363;84809749;84813362;84816036;84828550;84829417;84830222;84830813;84831923;84853939;84868747;84876495	-	6603	Ltbp2	protein-coding	-3.25473	3.26983	-29.3557	1.81e-15	5.76e-14	25.7104
53608	chr4	133240818;133242818;133243053;133243311;133243675;133244982;133245506;133245778;133246258;133246630;133246875;133247080;133247202;133247414;133247581;133248013;133248388;133248792;133249662;133249930;133250208;133250649;133250924;133251342;133251611;133251859;133252055;133252400;133252652	133241431;133242957;133243076;133243501;133243843;133245088;133245676;133245890;133246417;133246792;133246982;133247129;133247297;133247501;133247714;133248140;133248524;133248897;133249819;133250122;133250346;133250805;133251100;133251447;133251773;133251971;133252128;133252476;133252928	+	4333	Map3k6	protein-coding	-1.81217	4.43908	-29.1704	2e-15	6.1e-14	25.7044
27060	chr19	3896050;3896270;3896604;3896795;3897038;3897468;3897758;3898548;3898718;3898980;3901891;3902344;3902631;3902882;3903046;3903340;3903509;3904217;3904585;3905075;3906524;3907019	3896192;3896447;3896721;3896902;3897169;3897681;3897876;3898638;3898875;3899119;3902035;3902556;3902724;3902964;3903172;3903428;3903729;3904295;3904705;3905230;3906983;3907133	-	3304	Tcirg1	protein-coding	-1.83806	5.57107	-29.3502	1.82e-15	5.77e-14	25.7038
320435	chr7	28788969;28790326;28790591;28792237;28794822;28794978;28795658;28795891;28796653;28797110;28797560;28797810	28789005;28790411;28790750;28792339;28794894;28795042;28795804;28796346;28796946;28797241;28797723;28798965	+	2873	Rinl	protein-coding	1.34584	5.34659	29.2647	1.9e-15	5.93e-14	25.6627
27015	chr13	96480689;96482458;96483491;96486808;96489182;96490937;96493829;96495408;96496603;96501519;96504511;96508212;96516639;96519029;96542327	96482254;96482491;96484405;96486979;96489278;96490969;96493995;96495532;96496842;96501672;96504642;96508364;96516758;96519187;96542485	-	4226	Polk	protein-coding	-1.19731	5.96005	-29.2991	1.87e-15	5.84e-14	25.6192
77619	chr18	41875696;41881213;41912370;41932601;41935168;41937634;41951101	41875853;41881285;41912475;41932761;41935241;41937691;41951194	-	724	Prelid2	protein-coding	2.48561	3.71318	28.9771	2.23e-15	6.58e-14	25.6145
223732	chr15	84553398	84557823	-	4426	Ldoc1l	protein-coding	-2.13733	3.67024	-28.9501	2.26e-15	6.63e-14	25.601
74190	chr12	111417430;111421499;111422063;111423393;111425163;111425494;111425899;111426132;111427920;111428458;111428657;111429415;111430669	111417754;111421583;111422478;111424047;111425274;111425616;111425999;111426212;111428034;111428577;111428809;111429536;111431183	+	2923	Exoc3l4	protein-coding	-2.48675	3.55883	-28.9724	2.23e-15	6.58e-14	25.5992
93737	chr18	80046895;80079825;80116969	80047142;80080047;80119640	+	3143	Pard6g	protein-coding	-2.04035	4.68366	-28.9838	2.22e-15	6.58e-14	25.5881
106840	chr5	115122566;115127011;115127302;115130467;115134667	115125500;115127183;115127413;115130580;115134975	-	3643	Unc119b	protein-coding	-1.14331	6.40629	-29.3084	1.86e-15	5.84e-14	25.5823
230073	chr4	40203777;40208451;40208771;40209879;40211550;40213731;40216355;40217330;40220399;40222035;40223798;40225040;40225598;40226597;40227966;40229495;40235248;40239591	40206106;40208594;40208922;40210049;40211640;40213879;40216490;40217487;40220503;40222197;40224056;40225193;40225705;40226719;40228113;40229676;40235382;40239825	-	4943	Ddx58	protein-coding	1.78732	4.6241	28.9792	2.22e-15	6.58e-14	25.5817
68598	chr4	132535559;132538187;132541782;132544056;132544657;132546637;132550377;132551535;132553017	132535663;132538288;132541838;132544122;132544751;132546708;132550468;132551610;132553742	+	1392	Dnajc8	protein-coding	1.31255	7.30254	29.4136	1.76e-15	5.63e-14	25.5763
241226	chr2	12106660;12110975;12119947;12132439;12140378;12155372;12160322;12174153;12178644;12182659;12189473;12191171;12191706;12193412;12194379;12200075;12204731;12230050;12232704;12242411;12245146;12247510;12250081;12253453;12255963;12257169;12262058;12265233;12300838;12301577	12109201;12111097;12120048;12132552;12140506;12155530;12160427;12174233;12178723;12182751;12189620;12191238;12191843;12193566;12194434;12200182;12204776;12230241;12232909;12242463;12245202;12247553;12250125;12253578;12256008;12257230;12262181;12265333;12300971;12301920	-	5782	Itga8	protein-coding	-2.9877	3.16157	-29.0959	2.09e-15	6.33e-14	25.5751
347722	chr1	89454811;89604598;89609496;89627761;89630388;89634160;89663661;89665034;89671179;89725961;89743728;89766306;89789163;89834434;89837712;89843021;89887506;89888691	89455592;89604656;89609583;89627846;89630529;89634294;89663788;89665189;89671271;89726065;89743896;89766464;89789324;89834588;89837802;89843243;89887761;89895282	+	9581	Agap1	protein-coding	-1.37443	6.56953	-29.3067	1.86e-15	5.84e-14	25.5723
217837	chr12	102568583;102573922;102579105;102584287;102587896;102588464;102606089;102623300;102675443;102704722	102570484;102574084;102579172;102584452;102587936;102588562;102606206;102623425;102675467;102704869	-	2856	Itpk1	protein-coding	1.34637	6.22856	29.2536	1.92e-15	5.96e-14	25.5686
16564	chr15	90933276;90935635;90937161;90938985;90940431;90942114;90943765;90948324;90949006;90951246;90952711;90956295;90959077;90959688;90964975;90965467;90966337;90967196;90968061;90968357;90968763;90969778;90970679;90971083;90971665;90972625;90976471;90980795;90984734;90985242;90985785;90991710;90993701;90994341;90995484;90997543;90997833;91049659	90934543;90935834;90937331;90939102;90940595;90942294;90943901;90948338;90949044;90951374;90952818;90956509;90959131;90959748;90964995;90965632;90966438;90967390;90968214;90968571;90968831;90969885;90970878;90971271;90971788;90972715;90976509;90980998;90984797;90985431;90985980;90991825;90993868;90994475;90995633;90997725;90998055;91049948	-	6454	Kif21a	protein-coding	-1.49961	4.70373	-28.9669	2.24e-15	6.58e-14	25.5648
18613	chr11	106654218;106671742;106679549;106681032;106682880;106683593;106684228;106684961;106688776;106690936;106695754;106697052;106699592;106714902;106715019	106655162;106671798;106679611;106681085;106682953;106683620;106684335;106685248;106689051;106691184;106696029;106697354;106699885;106714928;106715281	-	3305	Pecam1	protein-coding	1.12258	7.11771	29.3549	1.81e-15	5.76e-14	25.5529
101240	chr6	34880426;34884184;34886066;34886808;34888954;34889237;34891387;34892341;34896181;34904517;34905485;34906641;34908114;34909361;34910697	34880968;34884381;34886178;34886916;34889122;34889331;34891537;34892534;34896339;34904682;34905618;34906723;34908321;34909540;34910831	-	2637	Wdr91	protein-coding	-1.25682	6.06677	-29.1927	1.98e-15	6.05e-14	25.5502
54399	chr7	140853384;140854765;140855074;140856221	140854623;140854821;140855165;140856383	-	1552	Bet1l	protein-coding	-1.44246	5.47651	-29.04	2.15e-15	6.47e-14	25.5281
234740	chr8	111912018;111914489;111915257;111918291;111918828;111933360;111933628	111914109;111914594;111915338;111918434;111918956;111933529;111933791	-	2887	Tmem231	protein-coding	1.59381	5.51375	29.0426	2.15e-15	6.47e-14	25.5262
18015	chr11	79339892;79384175;79386655;79390209;79395855;79408414;79408702;79409394;79411496;79412055;79412684;79418552;79425513;79428578;79434845;79436690;79438687;79440848;79441629;79441891;79443769;79444600;79445024;79445716;79446806;79447484;79448125;79453803;79454099;79458771;79463233;79468717;79469773;79471435;79473329;79475773;79535603;79536793;79540330;79545354;79546272;79546971;79547668;79548474;795…	79340059;79384318;79386738;79390399;79395961;79408481;79408777;79409551;79411669;79412177;79412758;79418683;79425647;79428691;79434924;79436813;79438848;79441097;79441702;79441974;79444209;79444739;79445146;79445799;79446922;79447665;79448336;79453964;79454202;79458906;79463295;79468875;79469870;79471581;79473475;79475883;79536035;79537133;79540532;79545547;79546412;79547250;79547882;79548535;795…	+	11847	Nf1	protein-coding	-1.09481	6.51893	-29.2236	1.95e-15	6e-14	25.524
211651	chr6	113531682;113533774;113535769;113536714;113536924;113537607;113539261;113542207;113545010;113546593;113548342;113548850;113549301;113549593;113551760;113553680;113555135;113556263;113560086;113561706;113562373;113563093;113563445;113564294;113565157;113566810;113568208;113568604;113570873;113572644;113574087;113574574;113577365;113578361;113581384;113583412;113584849;113585472;113586210;113587382…	113531748;113533871;113535903;113536781;113537027;113537667;113539313;113542285;113545134;113546680;113548446;113548950;113549409;113549628;113551903;113553814;113555266;113556373;113560195;113561766;113562492;113563166;113563588;113564394;113565272;113566918;113568318;113568716;113571016;113572760;113574215;113574692;113577475;113578491;113581477;113583534;113584942;113585543;113586248;113587456…	+	4780	Fancd2	protein-coding	1.19502	6.38858	29.2005	1.97e-15	6.04e-14	25.5215
228413	chr2	104830741;104839322;104842055;104844990;104849076;104849546	104832810;104839454;104842103;104845153;104849200;104849850	-	2846	Prrg4	protein-coding	-1.80908	5.6971	-29.0346	2.16e-15	6.48e-14	25.512
73251	chr3	51515318;51526845;51530071;51532975;51536466;51542632;51550235;51560518	51521487;51527002;51530188;51533056;51536655;51542833;51550364;51560823	-	7356	Setd7	protein-coding	-1.31524	5.40381	-28.9812	2.22e-15	6.58e-14	25.4994
100042498	chr11	75461539;75463693;75465307	75461755;75463857;75466690	+	1766	Mir22hg	ncRNA	-2.26376	3.62613	-28.767	2.5e-15	7.14e-14	25.4978
228432	chr2	110658140;110661167;110661424;110665832;110666375;110667720;110671119;110681815;110682664;110687971;110697026;110697401;110697938;110738771;110745821;110756938;110761443;110768813;110770936;110774991;110781399;110783665;110794913;110862820;110880805;110884851;110950058	110658322;110661272;110661504;110665979;110666527;110667853;110671216;110681872;110682775;110688297;110697190;110697541;110698020;110738831;110745917;110757072;110761564;110768868;110771042;110775122;110781443;110783765;110795071;110862938;110880876;110885045;110950244	-	3377	Ano3	protein-coding	-2.03322	4.11261	-28.7536	2.52e-15	7.17e-14	25.493
57230	chr11	115933659;115935366;115938010;115951967;115957361;115960500;115961356;115961739;115962494;115963943;115964211	115933781;115935475;115938057;115952009;115957449;115960591;115961416;115961790;115962552;115964027;115965534	+	2086	Sap30bp	protein-coding	-1.14875	6.86914	-29.2026	1.97e-15	6.04e-14	25.4859
27008	chr15	79108983;79114655;79115030;79119736;79120759;79122547;79124501;79125250;79126927;79129809;79130463;79130709;79130938;79131774;79132053;79133000	79109429;79114703;79115171;79119827;79120901;79122986;79124558;79125674;79127333;79129943;79130589;79130799;79131011;79131888;79132099;79136900	+	6693	Micall1	protein-coding	-2.16709	5.33724	-28.8754	2.36e-15	6.88e-14	25.4714
16562	chr11	70700548;70702372;70702772;70703268;70703699;70704458;70704899;70705170;70705681;70705900;70706053;70706681;70706941;70708442;70708779;70708951;70717419;70718999;70724048;70724822;70725104;70725888;70728202	70700709;70702551;70702905;70703344;70703878;70704523;70705077;70705281;70705758;70705965;70706128;70706759;70707086;70708611;70708858;70709026;70717498;70719093;70724131;70725008;70725176;70726502;70731970	+	6764	Kif1c	protein-coding	-1.22871	7.19427	-29.2045	1.97e-15	6.04e-14	25.4655
382051	chr8	104591468;104593480	104591595;104596849	+	3498	Pdp2	protein-coding	1.29207	5.2278	28.8884	2.34e-15	6.84e-14	25.462
78611	chr4	117119218;117121198;117121414;117122219;117123729;117124504;117125329	117120861;117121329;117121482;117122278;117123782;117124726;117125725	-	2579	Btbd19	ncRNA	-1.26889	6.02503	-28.9929	2.21e-15	6.58e-14	25.4412
109652	chr9	106432996;106433362;106433567;106434530;106434685;106434965;106435096;106435468;106435615;106435784;106436126;106436696;106436889;106437629;106438133	106433245;106433422;106433646;106434598;106434829;106435014;106435169;106435524;106435704;106435860;106436220;106436800;106436953;106437737;106438236	-	1431	Acy1	protein-coding	1.75096	5.23806	28.8	2.46e-15	7.04e-14	25.422
12257	chr15	83563573;83571385;83572200;83573770	83563644;83571595;83572338;83574203	+	856	Tspo	protein-coding	2.31607	3.50401	28.6266	2.7e-15	7.55e-14	25.4153
50766	chr17	78200248;78237742;78279973;78281246;78302987;78313124;78315549;78335227;78344350;78345861;78347077;78350684;78354956;78367792;78369995;78372578;78374056	78201099;78237915;78280215;78281366;78303108;78313306;78315746;78335355;78344506;78345982;78347286;78350899;78355177;78367986;78370117;78372768;78376592	+	5995	Crim1	protein-coding	-1.8495	4.46888	-28.6423	2.68e-15	7.5e-14	25.4083
14102	chr19	34290659;34307125;34309036;34315179;34316569;34318590;34318783;34319310;34320561;34326993	34290744;34307278;34309350;34315316;34316677;34318651;34318836;34319389;34320585;34327770	+	1801	Fas	protein-coding	-3.56501	2.50058	-29.3645	1.8e-15	5.76e-14	25.4044
242805	chr4	155791172;155791598;155792808	155791508;155792132;155793182	+	1247	Ankrd65	protein-coding	-2.93398	2.7221	-28.978	2.23e-15	6.58e-14	25.3986
67054	chr5	76951411;76956546;76959315;76961110;76961393;76962427;76964442;76966247;76966648	76951835;76956743;76959493;76961289;76961506;76962510;76964622;76966405;76967505	+	2378	Paics	protein-coding	1.0368	8.90189	29.2457	1.92e-15	5.97e-14	25.3986
240505	chr19	6306457;6309126;6309299;6309727;6310218;6310795;6311022;6311322;6312118;6313219;6313415;6313689;6313891;6314285;6314496;6314705;6314990;6315172;6315639;6315864;6316199;6316341;6316519;6316829;6317161;6317375;6317604;6318358;6320079;6320243;6321657;6321827;6322027;6322254;6322555;6322793;6324517	6306875;6309217;6309382;6309822;6310366;6310888;6311222;6311570;6312197;6313316;6313495;6313795;6314070;6314365;6314617;6314780;6315096;6315286;6315787;6315952;6316251;6316439;6316578;6316934;6317294;6317514;6317685;6318574;6320141;6320842;6321754;6321911;6322147;6322371;6322678;6322881;6325652	+	5994	Cdc42bpg	protein-coding	-1.2882	7.25217	-29.0867	2.1e-15	6.35e-14	25.3954
235604	chr9	107935920;107945279;107945489;107945790;107946079;107946340;107946618;107946783;107947082;107947380;107947744	107936051;107945382;107945620;107945864;107946217;107946460;107946693;107946919;107947160;107947467;107949691	+	3031	Camkv	protein-coding	2.8007	3.02676	28.7483	2.53e-15	7.17e-14	25.3894
231510	chr5	100846229;100846655;100857142;100883190;100884318;100884960;100885926;100890103;100891643;100892301;100893072;100893433;100897717	100846361;100846948;100857208;100883460;100884392;100885049;100886019;100890218;100891698;100892386;100893200;100893512;100899102	+	2877	Agpat9	protein-coding	-2.38526	4.04341	-28.5574	2.81e-15	7.81e-14	25.3882
60406	chr8	57482702;57485042;57485510;57487252	57483050;57485140;57485635;57487860	-	1183	Sap30	protein-coding	1.30432	7.04348	29.0489	2.14e-15	6.46e-14	25.3864
20393	chr10	21882184;21928342;21969449;21978672;21986104;21992223;21993890;21994666;21994966;21995474;21995794;21996026;21996223;21996559;21996979;21997342;21997898;21998160;21998660	21882707;21928551;21969524;21978982;21986207;21992407;21994181;21994825;21995041;21995549;21995898;21996109;21996354;21996671;21997102;21997437;21998053;21998249;21999903	+	4158	Sgk1	protein-coding	1.48864	7.67521	29.1016	2.08e-15	6.32e-14	25.3786
69724	chr8	84956610;84957966;84959776;84959967;84965131;84965317;84965571;84965860	84957864;84958089;84959863;84960104;84965218;84965443;84965642;84966011	-	2044	Rnaseh2a	protein-coding	1.10968	6.77293	28.9714	2.23e-15	6.58e-14	25.3587
226744	chr1	179546529;179579338;179592685;179601702;179604519;179604953;179606248;179606437;179609786;179622767;179624999	179546616;179579768;179592866;179601732;179604605;179605067;179606269;179606533;179610666;179622902;179627473	+	4545	Cnst	protein-coding	-1.30852	5.84742	-28.8035	2.45e-15	7.04e-14	25.3518
74760	chr19	10018228;10026530;10027384;10027560;10028285;10030150;10030369;10032353;10033744;10034457	10018359;10026785;10027479;10027637;10028503;10030278;10030481;10032452;10033810;10035586	+	2320	Rab3il1	protein-coding	-1.81782	4.06099	-28.4732	2.94e-15	8.1e-14	25.3358
83925	chr15	50654757;50664687;50822105;50830829;50846014;50889604	50661736;50664809;50822708;50831958;50846942;50890041	-	10204	Trps1	protein-coding	1.71638	5.41097	28.6822	2.62e-15	7.38e-14	25.3357
94091	chr11	58978116;58981241;58981993;58988725;58988829;58990187	58978644;58981336;58982223;58988747;58988929;58991458	+	2252	Trim11	protein-coding	-1.24191	6.39832	-28.8649	2.37e-15	6.91e-14	25.333
66540	chr2	3713458;3772796;3778418;3779501	3713636;3772979;3778568;3782134	+	3148	Fam107b	protein-coding	-1.60855	5.66376	-28.7122	2.58e-15	7.28e-14	25.3262
18830	chr2	164839518;164840114;164840321;164840495;164844435;164844595;164846594;164846740;164851513;164852473;164852617;164854266;164854927;164856704;164856887;164857584	164839828;164840190;164840384;164840537;164844502;164844759;164846653;164846916;164851604;164852536;164852680;164854421;164855055;164856803;164856997;164857708	-	1806	Pltp	protein-coding	-1.63432	5.94792	-28.7614	2.51e-15	7.15e-14	25.326
12702	chr11	117966079;117968875	117968318;117969366	-	2732	Socs3	protein-coding	1.34383	6.27977	28.8252	2.42e-15	6.98e-14	25.3202
74091	chr1	153503016;153509112;153512546;153515240;153515402;153518883;153524347;153528065;153535872;153537428;153545263;153549648	153503557;153509151;153512630;153515286;153515550;153518975;153524422;153528122;153535959;153537501;153545346;153549714	-	1403	Npl	protein-coding	1.63231	4.42005	28.456	2.97e-15	8.15e-14	25.2998
18969	chr19	5940543;5941105;5941996;5942350;5943223;5943555;5946470;5947704;5948402;5950446;5951142;5951631;5953065;5953691;5956008;5958818;5959033;5961091;5963826	5941017;5941552;5942122;5942409;5943329;5943663;5946543;5947742;5948526;5950488;5951204;5951786;5953153;5953884;5956114;5958875;5959124;5961215;5964206	-	2872	Pola2	protein-coding	1.06721	6.47665	28.8282	2.42e-15	6.98e-14	25.2996
664994	chr7	4877053;4891184;4891458;4891831;4891994;4895317	4877193;4891330;4891667;4891901;4892111;4895717	+	1088	Isoc2a	protein-coding	1.39107	5.15724	28.5799	2.77e-15	7.72e-14	25.2959
66841	chr3	79603788;79604905;79605630;79609799;79611912;79613622;79615000;79615924;79618307;79618839;79622738;79623541;79628518	79604165;79605126;79605812;79609967;79612055;79613762;79615146;79616001;79618425;79618920;79622967;79623678;79628767	-	2281	Etfdh	protein-coding	-1.55065	5.96686	-28.7138	2.58e-15	7.28e-14	25.2943
67922	chr8	72219730;72219941;72221928;72222182	72219860;72220082;72221981;72223775	+	1921	Fam32a	protein-coding	-1.08392	6.55427	-28.8258	2.42e-15	6.98e-14	25.2942
68553	chr9	105990318;105995921;105997125;106000212;106003179;106013304;106013882;106016496;106017854;106019404;106020602;106020766;106022874;106025491;106026456;106028190;106029967;106033756;106033929;106040572;106041092;106044225;106047715;106049832;106051633;106057381;106060041;106060324;106061482;106062773;106066652;106067847;106071914;106074822;106076872;106079945;106082867;106096657	105990834;105996132;105997221;106000895;106003269;106013797;106013893;106016532;106017889;106019466;106020664;106020801;106022924;106025553;106026518;106028252;106030029;106033791;106033982;106040637;106041154;106044278;106047759;106049858;106051704;106057434;106060133;106060469;106061560;106063107;106067206;106068392;106072558;106075430;106077459;106080547;106082955;106096691	-	7439	Col6a4	protein-coding	-1.55738	4.70478	-28.4679	2.95e-15	8.11e-14	25.2838
12334	chr1	182467259;182470179;182470679;182472521;182472924;182473882;182477251;182478548;182479706;182481447;182482536;182484203;182486544;182487715;182488994;182489965;182490867;182492062;182492752;182512207;182517118	182468235;182470237;182470795;182472599;182472992;182473946;182477308;182478613;182479742;182481658;182482547;182484372;182486704;182487789;182489079;182490048;182491035;182492195;182492870;182512276;182517483	-	3185	Capn2	protein-coding	-1.2781	5.51275	-28.6222	2.71e-15	7.56e-14	25.2823
23827	chr1	185332159;185338106;185341223;185345315;185346675;185348744;185352182;185353957;185356478	185332263;185338232;185341327;185345422;185346723;185348835;185352379;185354062;185357769	+	2182	Bpnt1	protein-coding	1.44355	5.85903	28.678	2.63e-15	7.39e-14	25.2789
106529	chr8	83571698;83572013;83572232;83572398;83572549;83572681;83572841;83573028;83573220;83573411;83573871;83574478;83594340	83571935;83572058;83572320;83572455;83572592;83572753;83572946;83573143;83573323;83573455;83573922;83574528;83594491	-	1174	Tecr	protein-coding	1.10233	6.49849	28.782	2.48e-15	7.1e-14	25.2717
50796	chr19	25505706;25509680;25545819;25559867;25603187	25506201;25509863;25546102;25560011;25604328	+	2251	Dmrt1	protein-coding	2.06098	3.76386	28.3296	3.19e-15	8.61e-14	25.262
66659	chr3	97158777;97165843;97166074;97166540;97167987;97168441;97171642;97173803;97175628;97176331	97159365;97165971;97166204;97166616;97168074;97168573;97171742;97173898;97175793;97176576	+	1756	Acp6	protein-coding	1.07844	7.08537	28.8392	2.4e-15	6.98e-14	25.2607
319530	chr11	121510976;121512627;121519230	121512499;121514232;121519342	-	3243	Zfp750	protein-coding	-1.95648	4.03346	-28.2551	3.33e-15	8.93e-14	25.2156
80877	chr3	86224690;86225069;86284997;86285634;86291427;86295089;86295302;86296246;86297865;86304236;86304600;86309961;86310387;86315336;86318095;86319561;86320505;86323729;86325006;86325701;86327599;86328164;86348119;86350247;86351203;86351829;86353669;86354199;86356587;86359731;86368504;86372078;86373436;86375905;86395221;86417888;86445307;86532085;86539903;86542575;86605870;86608348;86614972;86619510;866…	86224754;86225504;86285228;86285734;86291522;86295210;86295428;86296365;86298011;86304433;86304733;86310069;86310539;86315504;86318174;86319623;86320602;86323821;86325114;86325782;86327722;86328356;86349168;86350425;86351356;86352009;86353796;86354306;86356746;86360181;86368637;86372156;86373569;86375966;86395285;86417996;86445473;86532209;86540049;86542711;86605987;86608450;86615087;86619622;866…	+	11512	Lrba	protein-coding	-1.11005	7.05472	-28.7286	2.55e-15	7.24e-14	25.201
286940	chr14	7817957;7867537;7869780;7873345;7881583;7882207;7883760;7884550;7887537;7889135;7890730;7892080;7892873;7893744;7894134;7894527;7896090;7896386;7901884;7904462;7905378;7907153;7908522;7909609;7912955;7915261;7915947;7917194;7919110;7922675;7923455;7924173;7926383;7927346;7929001;7929759;7930763;7931024;7933714;7934564;7935934;7939047;7942045;7945795;7948444;7950305	7818443;7867785;7869877;7873492;7881701;7882284;7883922;7884747;7887674;7889261;7890866;7892273;7892986;7893887;7894257;7894687;7896180;7896555;7902001;7904724;7905975;7907326;7908684;7909769;7913122;7915384;7916103;7917383;7919357;7922713;7923557;7924313;7926511;7927519;7929159;7929962;7930915;7931146;7933980;7934701;7936049;7939179;7942221;7946013;7948647;7951588	+	9067	Flnb	protein-coding	-1.00696	9.94772	-28.9709	2.24e-15	6.58e-14	25.1961
80981	chr11	101665541;101666548	101665637;101667832	+	1382	Arl4d	protein-coding	1.86346	4.65613	28.2969	3.25e-15	8.76e-14	25.1944
245827	chr11	55250610;55253524;55256104;55256504;55260446;55262062;55265862;55267577;55268175;55269254;55270086;55272995;55275984;55278887;55281038;55285879;55287655;55289218;55291874;55296074;55298558;55303638;55308988	55252498;55253981;55256257;55256945;55260591;55262872;55266059;55267720;55268312;55269468;55270469;55273228;55276137;55279083;55285096;55286089;55287936;55289357;55292084;55296385;55298616;55303952;55312257	-	14423	Fat2	protein-coding	-2.23476	3.90963	-28.1892	3.45e-15	9.15e-14	25.1831
14132	chr7	45092993;45093782;45095160;45101910;45102414;45103003;45103640	45093355;45093898;45095429;45102185;45102671;45103273;45103822	-	1738	Fcgrt	protein-coding	2.09331	3.9051	28.1881	3.45e-15	9.15e-14	25.1813
18412	chr11	50200152;50202399;50202814;50206023;50207160;50207407;50207821;50210553	50200947;50202594;50203034;50206103;50207301;50207636;50207916;50210790	-	2000	Sqstm1	protein-coding	-0.928544	8.41572	-28.8238	2.42e-15	6.98e-14	25.1801
235493	chr9	74953053;74953714;74976111;75004265;75006288;75006962;75008651;75012941;75015844;75017038;75018997;75023585;75025651;75031515	74953278;74953830;74976276;75004449;75006490;75007087;75010466;75013054;75015923;75017146;75019155;75023653;75025847;75032468	+	4521	Fam214a	protein-coding	-1.63782	5.18945	-28.3461	3.16e-15	8.55e-14	25.1674
69104	chr19	37207545;37210671;37217183;37220303;37220639;37221390	37207904;37210873;37218215;37220486;37221076;37224457	+	5286	2017-03-05	protein-coding	-1.06222	7.13502	-28.661	2.65e-15	7.44e-14	25.156
242669	chr4	128932146;128934457;128946057;128947459;128948792;128949590;128950600;128959784;128961363;128962084;128962301	128932491;128934671;128946169;128947618;128948957;128949724;128950772;128959957;128961559;128962204;128962417	-	1917	Azin2	protein-coding	-1.24741	5.95701	-28.484	2.93e-15	8.07e-14	25.1555
110380	chrX	152609509;152613395;152617193;152618901;152623126;152657424;152659264;152673532;152695640;152769286	152612794;152613667;152617355;152619446;152623335;152657524;152661718;152673663;152695791;152769461	-	7494	Shroom2	protein-coding	-1.17687	5.74555	-28.4445	2.99e-15	8.19e-14	25.1528
234663	chr8	104417674;104422287;104423113;104423586;104425439;104425959;104428046;104429415;104430401;104437363;104440474;104442474;104442695	104420682;104422403;104423230;104423627;104425498;104426070;104428181;104429508;104430570;104437593;104440590;104442547;104443047	-	4633	Dync1li2	protein-coding	-1.16662	6.94169	-28.5072	2.89e-15	8e-14	25.0816
229055	chr3	9250567;9264535;9278254;9279956;9280291;9280734	9252080;9265420;9278352;9280132;9280463;9285333	+	7449	Zbtb10	protein-coding	-1.29574	6.61801	-28.4331	3.01e-15	8.22e-14	25.066
74053	chr10	119454314;119819512;119897715;119929901;119931244;119938244;119942862;119945026;119975870;119978438;119985474;119986332;119999752;120000526;120010206;120018073;120019961;120035351;120038291;120038599;120049351;120050005;120050232;120054833;120072631;120075290	119454422;119819634;119897795;119930036;119931389;119938327;119942937;119945171;119976017;119978607;119985629;119986484;119999938;120000671;120010286;120018142;120020106;120035495;120038430;120038793;120049507;120050116;120050276;120055066;120072777;120075597	+	3641	Grip1	protein-coding	-2.66718	3.23715	-28.0595	3.71e-15	9.77e-14	25.0598
67664	chr18	20944625;20974299;20977729;20979051;20981171;20983099	20944757;20974455;20977823;20979141;20981278;20983848	+	1334	Rnf125	protein-coding	2.84666	3.26239	28.0475	3.74e-15	9.82e-14	25.0533
80982	chr7	83932857;83937387;83942006;83943619;83943882;83947148;83948580;83951403;83952787;83955221;83955458;83957588;83958509;83961543;83963045;83963986;83973173;83975040;83982192;83983134;83987338;83987960;83989133;83992018;83997222;83998491;83999109;84003312;84086258	83935748;83937487;83942163;83943705;83944086;83947333;83948791;83951618;83952967;83955376;83955493;83957719;83958594;83961671;83963114;83964191;83973382;83975215;83982383;83983266;83987459;83988055;83989203;83992197;83997458;83998629;83999255;84003421;84086505	-	7114	Cemip	protein-coding	-2.39947	4.25969	-27.974	3.9e-15	1.01e-13	25.0522
11614	chrX	86191775;86195351	86192974;86195944	+	1794	Nr0b1	protein-coding	2.21048	3.84549	27.9383	3.98e-15	1.03e-13	25.0412
60611	chr6	122820184;122828157;122831436;122832938;122833161;122833681;122837821;122838584;122839461;122840226;122842764	122820970;122828503;122831510;122833006;122833301;122833876;122838204;122838685;122839670;122840324;122845366	+	5013	Foxj2	protein-coding	-1.98574	4.6584	-28.0172	3.8e-15	9.94e-14	25.0396
20397	chr10	61098642;61101681;61102568;61103121;61104463;61105422;61106265;61107577;61112162;61113438;61114010;61117695;61123309;61146258;61147523	61101008;61101801;61102714;61103359;61104612;61105520;61106370;61107665;61112290;61113514;61114157;61117762;61123474;61146331;61147665	-	4123	Sgpl1	protein-coding	-1.11027	7.03231	-28.4226	3.03e-15	8.25e-14	25.0251
217830	chr12	100779123;100829599;100835185;100838500;100841371;100842643;100844730;100850113;100853214;100856921;100859533;100867104;100871304	100779310;100829725;100835335;100838698;100841521;100842765;100844930;100850373;100853313;100857069;100859652;100867255;100872610	+	3229	9030617O03Rik	protein-coding	-1.31694	5.71584	-28.2076	3.42e-15	9.09e-14	25.0216
69171	chr1	75135215;75137326;75137755;75139347;75139559;75139821;75140898;75141416;75142058	75136932;75137443;75137816;75139475;75139679;75139902;75141006;75141503;75142368	-	2738	Cnppd1	protein-coding	-1.66978	4.94036	-28.0285	3.78e-15	9.89e-14	25.0108
56277	chr16	56805161;56811526;56822225;56823388;56825666;56885813	56806776;56811671;56822409;56823594;56825858;56886163	-	2698	Tmem45a	protein-coding	2.33381	3.36025	27.9112	4.04e-15	1.04e-13	25.0094
18648	chr19	41911871;41915605;41916643;41917606	41912186;41915879;41916823;41918665	+	1832	Pgam1	protein-coding	1.23849	7.35016	28.4026	3.06e-15	8.33e-14	24.9924
15109	chr10	93488768;93489874;93490040;93490747;93490915;93491099;93491810;93492453;93494611;93496583;93497475;93498759;93498956;93500617;93503262;93503404;93507415;93514034;93514259;93516182	93489377;93489934;93490067;93490821;93490987;93491165;93491847;93492578;93494750;93496630;93497622;93498854;93499014;93500697;93503327;93503569;93507549;93514142;93514328;93516743	+	2758	Hal	protein-coding	3.00802	2.91354	28.0798	3.67e-15	9.68e-14	24.9914
104175	chr7	126272619;126289857;126291043;126291825	126273099;126290089;126291245;126294999	+	4092	Sbk1	protein-coding	-1.37152	5.81239	-28.1508	3.53e-15	9.33e-14	24.9795
319189	chr3	96269700	96270192	+	493	Hist2h2bb	protein-coding	1.29387	9.26815	28.5269	2.86e-15	7.92e-14	24.9684
210044	chr13	68620043;68625788;68630910;68640710;68642457;68651868;68657367;68668470;68671893;68678478;68689261;68709993;68713058;68720704;68724264;68727792;68729207;68730238;68732078;68734624;68738548;68796530;68887959;68982347;68999074	68620872;68625912;68631024;68640817;68642603;68652026;68657451;68668639;68672012;68678615;68689345;68710090;68713127;68720784;68724307;68727968;68729339;68730396;68732205;68734735;68738696;68796679;68888120;68982544;68999541	-	4211	Adcy2	protein-coding	-2.37773	3.68887	-27.7887	4.33e-15	1.1e-13	24.9549
68337	chr12	113140236;113143459;113144015;113144229;113144399;113144810;113144963	113140614;113143611;113144155;113144297;113144493;113144867;113145506	+	1439	Crip2	protein-coding	-1.58154	6.85017	-28.2492	3.34e-15	8.94e-14	24.9456
110308	chr15	101707070;101708117;101708876;101709753;101710251;101710536;101710739;101711529;101712274	101707722;101708151;101709096;101709878;101710415;101710631;101710799;101711743;101712891	-	2190	Krt5	protein-coding	-4.68584	2.54584	-28.8511	2.39e-15	6.94e-14	24.9381
11749	chr11	54978962;54981616;54983298;54985076;54986122;54987051;54991391;54992287;54994284;54994467;54994885;54996313;54998535;54999795;55001211;55003979;55004667;55005113;55005785;55007858;55009110;55010992;55011703;55013825;55021537;55033359	54979521;54981738;54983356;54985171;54986215;54987068;54991444;54992366;54994374;54994580;54994979;54996394;54998613;54999853;55001333;55004037;55004762;55005206;55005841;55007937;55009200;55011105;55011797;55013915;55021580;55033471	-	2661	Anxa6	protein-coding	0.956173	7.27894	28.2931	3.26e-15	8.76e-14	24.9304
236920	chrX	99042581;99060728;99063365;99064394;99065558;99067589;99068574;99069188;99069747;99070222;99071274;99072434;99072754;99073083	99042794;99060799;99063446;99064457;99066963;99067762;99068733;99069386;99069957;99070336;99071498;99072651;99072930;99074728	+	4963	Stard8	protein-coding	-1.44054	5.05377	-27.8959	4.08e-15	1.05e-13	24.9153
19649	chr9	37416045;37416697;37417326;37417691;37417919;37418486;37418840;37419118;37419669;37420017;37420138;37420888;37421406;37421819;37422115;37422530;37423182;37423890;37424327;37424633;37425207;37427026;37427378;37427755;37427990;37429035;37429488;37432842	37416399;37416920;37417502;37417801;37418070;37418698;37418978;37419312;37419808;37420059;37420161;37421073;37421577;37421940;37422340;37422651;37423348;37424055;37424408;37424838;37425378;37427150;37427505;37427893;37428110;37429192;37429814;37433175	-	4726	Robo3	protein-coding	-2.57488	4.00497	-27.7154	4.52e-15	1.14e-13	24.9141
68628	chr8	85060119;85061946;85062172;85064384;85064581;85065821;85066056;85066273;85066445;85066590	85060536;85062085;85062300;85064496;85064672;85065969;85066169;85066362;85066510;85067121	+	1843	Fbxw9	protein-coding	-1.13384	6.90609	-28.216	3.4e-15	9.06e-14	24.9137
217734	chr12	87106866;87110004;87110302;87111337;87111524;87111879;87116531;87117385;87117939;87119572;87122842;87124812;87127302;87128953;87130289;87131672;87133360;87135495;87138003;87139644;87147171	87109293;87110118;87110442;87111442;87111583;87111950;87116607;87117476;87118090;87119650;87122911;87124878;87127411;87129035;87130395;87131831;87133468;87135603;87138107;87139728;87147902	-	5059	Pomt2	protein-coding	-1.29421	5.37312	-27.9535	3.94e-15	1.02e-13	24.9099
22379	chr15	99317222;99318918;99319131;99319562;99319985;99320353;99321036;99321255;99321434;99321631;99322195;99322603;99322812;99323320;99324741;99325241;99325643;99325854;99327515;99327821;99328058;99329280;99331987;99334854;99335688;99337630;99370177	99318372;99319017;99319254;99319654;99320086;99320513;99321165;99321335;99321502;99321865;99322397;99322727;99322880;99323599;99324842;99325390;99325753;99325928;99327608;99327897;99328166;99329432;99332070;99334930;99335768;99337713;99370466	-	4410	Fmnl3	protein-coding	-1.21536	5.92548	-28.0444	3.75e-15	9.82e-14	24.9016
18148	chr11	33152498;33153986;33154925;33156003;33156664;33156991;33159934;33160334;33160828;33161106;33161548;33162922	33152852;33154060;33155220;33156104;33156747;33157048;33159995;33160440;33160921;33161225;33161627;33163206	-	1718	Npm1	protein-coding	1.02302	10.5488	28.4972	2.9e-15	8.03e-14	24.8974
21881	chr14	30549149;30558721;30559752;30560587;30565488;30566942;30568164;30568975;30569956;30570203;30570963;30571152;30572208;30573337	30549380;30558838;30559865;30560684;30565679;30567060;30568357;30569139;30570112;30570333;30571046;30571245;30572330;30574722	+	3207	Tkt	protein-coding	1.11048	8.85966	28.3705	3.12e-15	8.47e-14	24.8952
16008	chr1	72824480;72849086;72849564;72851998	72824964;72849312;72849704;72852474	+	1330	Igfbp2	protein-coding	1.18272	8.87588	28.3529	3.15e-15	8.53e-14	24.8844
71833	chr11	106036872;106046691;106047637;106048143;106051757;106053731;106054683	106037261;106046849;106047748;106048261;106051966;106053848;106059324	+	5750	Dcaf7	protein-coding	-1.10447	7.40958	-28.2211	3.39e-15	9.05e-14	24.8825
76645	chr8	116995679;116997536;116998076;116999773;117009570;117011498;117013864;117014863;117016818;117019405;117021040;117021818;117023863;117028279;117029530;117030542;117032684;117035032;117035807;117038030;117040653;117042209;117043233;117044488;117046063;117047379;117049907;117051030;117051643;117054862;117056314;117057413;117059462;117060508;117063236;117064054;117065503;117068084;117072445;117076124…	116995840;116997667;116998177;116999983;117009730;117011625;117013997;117015190;117017003;117019542;117021133;117022022;117024091;117028495;117029735;117030741;117032830;117035210;117035908;117038260;117040846;117042428;117043364;117044614;117046187;117047561;117050038;117051221;117051788;117055038;117056455;117057533;117059669;117060625;117063285;117064131;117065916;117068313;117072592;117076234…	-	7386	Pkd1l2	protein-coding	-2.88811	2.72831	-27.919	4.02e-15	1.04e-13	24.8559
16783	chr8	13159135;13165849;13167158;13167807;13171205;13172541;13173627;13173780;13174419	13159434;13165967;13167377;13167965;13171383;13172660;13173693;13173950;13175338	+	2255	Lamp1	protein-coding	0.990493	8.44869	28.2356	3.36e-15	9e-14	24.8355
69151	chr4	149485333;149486752;149488056;149488630;149493199;149493732;149496080	149485999;149486860;149488191;149488728;149493294;149493813;149496668	+	1778	Lzic	protein-coding	-1.12178	6.21003	-27.9802	3.88e-15	1.01e-13	24.8334
70508	chr16	50191844;50200408;50202378;50209085;50220445;50223250;50224288;50240854;50247782;50251314;50262416;50266177;50274547;50280369;50331029;50428910;50432242	50197646;50200591;50202575;50209144;50220593;50223385;50225293;50240934;50247856;50251394;50262483;50266369;50274789;50280539;50331102;50428981;50432389	-	8742	Bbx	protein-coding	-1.13172	7.43517	-28.1189	3.59e-15	9.48e-14	24.8209
232023	chr6	57752264;57762435;57774711;57789977;57824927	57754676;57762571;57774788;57790035;57825125	-	2886	Vopp1	protein-coding	-3.11186	3.23176	-27.6702	4.64e-15	1.16e-13	24.8193
237387	chr10	77897575;77902399	77901732;77902536	-	4296	Lrrc3	protein-coding	-2.50629	3.42807	-27.5559	4.95e-15	1.23e-13	24.8075
381371	chr2	71719417;71723290;71730350;71730709	71719508;71723496;71730433;71730966	+	641	Platr26	ncRNA	2.5555	3.20861	27.5717	4.91e-15	1.22e-13	24.7968
67074	chr10	122992061;122999659;123002696;123006012;123006972;123008136;123009503;123009913;123010494;123013368;123014941;123016263;123018075;123020304;123022834;123023086;123023910;123026080;123026254;123026407;123026909;123029133;123030110;123031040;123032523;123034305;123035468;123036012;123038461;123042231;123042975;123046298;123051637;123052185;123059188;123075852	122995833;122999741;123002903;123006135;123007032;123008326;123009631;123009930;123010637;123013990;123015139;123016556;123018237;123020479;123022944;123023088;123024011;123026170;123026327;123026487;123027013;123029245;123030294;123031124;123032749;123034458;123035604;123036136;123038655;123042356;123043069;123046427;123051768;123052312;123059251;123076505	-	9303	Mon2	protein-coding	-1.03451	6.57548	-27.9727	3.9e-15	1.01e-13	24.7946
73699	chr9	50856935;50857836;50858851;50861531;50862366;50866444;50866828;50867326;50867663;50870063;50873647;50878038;50878698;50879210;50879839;50883474;50891617;50892656	50857098;50857926;50858951;50861763;50862513;50866599;50866942;50867396;50867797;50870236;50873707;50878192;50878840;50879301;50881622;50883595;50891717;50894229	+	5420	Ppp2r1b	protein-coding	1.13805	6.22511	27.8981	4.07e-15	1.05e-13	24.7812
76809	chr5	125441568;125451670;125454326	125441892;125451772;125460885	+	6988	Bri3bp	protein-coding	1.2621	6.01434	27.8017	4.3e-15	1.1e-13	24.7473
243328	chr5	142702101;142705356;142711963;142712887;142714011;142715046;142717592;142718457;142718711;142719957;142721339	142702291;142705535;142712094;142713000;142714139;142715120;142717836;142718598;142718898;142720197;142722490	+	2789	Slc29a4	protein-coding	-1.93925	4.83028	-27.5317	5.02e-15	1.25e-13	24.7384
104886	chr12	76797963;76800566;76801892;76803068;76803568;76804443;76822194	76800401;76800631;76801981;76803145;76803628;76804503;76822524	-	3126	Rab15	protein-coding	-1.62291	4.26893	-27.4236	5.34e-15	1.31e-13	24.7171
72479	chr4	59581563;59592155;59593237;59594396;59596863;59597257;59601373;59606472;59610510;59612682;59617635	59581775;59592318;59593335;59594510;59596966;59597355;59601567;59606543;59610875;59612810;59618694	+	2616	Hsdl2	protein-coding	-1.44218	5.59963	-27.6362	4.73e-15	1.18e-13	24.7008
622117	chr8	43183122;43183703;43185279;43187571;43190069;43190269;43193203	43183365;43183798;43185458;43187711;43190091;43190369;43193884	+	1467	Triml2	protein-coding	1.1553	6.59539	27.8135	4.27e-15	1.09e-13	24.6983
78286	chr7	48959073;48963798;49246189;49362098;49372317;49398083;49408633;49420174;49452399;49458096;49461912;49464540;49491369;49535894;49545800;49547839;49551597;49552840;49554215;49556910;49558708;49564071;49565085;49565206;49570692;49571134;49572308;49575247;49575648;49582804;49584050;49585144;49587707;49589150;49594217;49597155;49597502;49598277;49598764;49604425;49606696	48959177;48964440;49247198;49362215;49372369;49398155;49408906;49420340;49453506;49458208;49462017;49464929;49491491;49536032;49546091;49548541;49552049;49552905;49554259;49557070;49558896;49564123;49565108;49565280;49570775;49571245;49572453;49575255;49575820;49582957;49584212;49585244;49587802;49589318;49594452;49597309;49597573;49598473;49598882;49604628;49610088	+	12066	Nav2	protein-coding	-2.25201	4.97452	-27.4667	5.21e-15	1.29e-13	24.6954
71665	chr4	135920726;135922967;135925549;135929899;135932899;135934690;135936923;135939074	135921150;135923101;135925686;135930004;135933099;135934880;135937022;135940300	+	2523	Fuca1	protein-coding	-1.16986	6.1006	-27.7273	4.49e-15	1.13e-13	24.6953
56351	chr10	128058982;128068672;128069216;128070134;128072068;128074222;128075338;128076067	128059286;128068785;128069285;128070232;128072157;128074284;128075362;128077254	+	1954	Ptges3	protein-coding	1.17554	6.93171	27.8401	4.21e-15	1.08e-13	24.6882
56224	chr3	138742195;138868346;138890735;138894348;138896789;138898113;138898267;138902379	138742660;138868396;138890881;138894518;138896914;138898160;138898383;138904424	+	3172	Tspan5	protein-coding	-1.77964	4.00278	-27.3379	5.62e-15	1.37e-13	24.6868
20200	chr3	90612894;90613743;90614191	90613226;90613904;90614414	+	719	S100a6	protein-coding	-1.52232	6.54557	-27.7634	4.4e-15	1.11e-13	24.6831
242125	chr3	101813076;101818623;101819366;101823240;101826731;101834994;101835921	101815252;101818817;101819544;101823531;101826871;101835264;101836223	-	3558	Mab21l3	protein-coding	-1.77252	4.7595	-27.4182	5.36e-15	1.31e-13	24.6733
56460	chr7	141078229;141079769;141082342;141082555;141083263;141084055;141087636;141088284;141088481;141088739;141089245;141089569;141089856;141090131	141078434;141080101;141082421;141083186;141083386;141084259;141087810;141088401;141088651;141088924;141089398;141089761;141089943;141090510	+	3045	Pkp3	protein-coding	-1.9932	4.8905	-27.4276	5.33e-15	1.31e-13	24.6724
27279	chr17	23675445;23676139;23676519;23677327	23676046;23676273;23676623;23677449	-	965	Tnfrsf12a	protein-coding	-1.36722	5.15	-27.4915	5.14e-15	1.27e-13	24.6638
22003	chr9	67022593;67023842;67027890;67029664;67031029;67031452;67031951;67032466;67032794;67033876;67035995;67043578;67047786;67048124;67049019	67023441;67024565;67028167;67029742;67031098;67031514;67032026;67032541;67032864;67033993;67036128;67043871;67047911;67048249;67049213	-	3279	Tpm1	protein-coding	-1.09782	8.48928	-27.9423	3.97e-15	1.03e-13	24.6606
104383	chr19	7269765;7270101;7270554;7270698;7270970;7271193;7271339;7273100;7273833;7274020;7274343	7269821;7270181;7270606;7270859;7271094;7271262;7271554;7273177;7273890;7274249;7275225	+	2013	Rcor2	protein-coding	1.3306	6.36555	27.681	4.61e-15	1.16e-13	24.6428
23918	chr9	108560501;108561034;108561597;108561783;108562174;108562792;108563136;108563421;108563596;108564635;108564866;108565102;108565327;108565498	108560631;108561082;108561698;108561857;108562380;108562879;108563335;108563511;108563691;108564778;108565010;108565245;108565410;108565573	+	1632	Impdh2	protein-coding	0.934292	8.08011	27.8781	4.12e-15	1.05e-13	24.6418
110196	chr3	89093588;89094231;89094452;89094860;89095014;89095354;89095599;89099300;89100669;89100921;89101862	89093843;89094365;89094529;89094932;89095102;89095476;89095679;89099440;89100831;89101136;89101967	-	1461	Fdps	protein-coding	1.32715	6.21955	27.6538	4.68e-15	1.17e-13	24.6404
320563	chr9	58196297;58200272;58201280;58201952;58202433;58204219	58199983;58200461;58201799;58202344;58202534;58204319	-	4993	Islr2	protein-coding	2.90664	3.79043	27.2332	5.97e-15	1.44e-13	24.6359
80285	chr16	35938470;35941033;35943369;35947501;35953563;35956807;35960004;35963975;35967650;35969591;35971835	35939060;35941135;35943402;35948354;35953778;35957025;35960061;35964364;35967786;35969765;35972621	+	3564	Parp9	protein-coding	2.48293	3.41537	27.2061	6.06e-15	1.46e-13	24.611
242202	chr3	122729158;122747889;122760878;122774553;122776256;122778935;122781567;122794260;122795234;122803032;122804550;122817921;122823056;122824915;122835553;122839542;122840971;122843045;122851650;122852538;122855195	122729367;122748477;122760967;122774624;122776345;122779072;122781634;122794368;122795321;122803207;122804609;122818067;122823181;122825009;122835640;122839642;122841048;122843108;122851724;122852621;122859374	+	6728	Pde5a	protein-coding	-1.98047	3.86151	-27.1903	6.12e-15	1.47e-13	24.6087
67229	chr2	4622167;4633433;4635631;4635828;4637148;4638849;4643651;4645569;4648241;4651916	4624526;4633588;4635702;4635968;4637216;4638995;4643764;4645673;4648318;4652086	-	3413	Prpf18	protein-coding	-1.34026	5.63691	-27.4459	5.28e-15	1.3e-13	24.5803
69178	chr2	144250123;144252445;144253662;144254726;144254903;144255340;144255499;144257100;144257870;144259057;144260725;144261920;144270377;144270701	144251232;144252530;144253821;144254812;144254942;144255415;144255604;144257195;144257993;144259178;144260835;144262024;144270572;144270902	-	2621	Snx5	protein-coding	1.21874	8.53578	27.7947	4.32e-15	1.1e-13	24.5703
71827	chr3	30624267;30629973;30631282;30631793;30634545;30636242;30642739;30643284;30643448;30645195;30647670	30624902;30630099;30631437;30631947;30634640;30636370;30642822;30643348;30643569;30645315;30647818	-	1840	Lrrc34	protein-coding	3.09637	3.39911	27.1425	6.29e-15	1.5e-13	24.5537
12841	chr2	180598222;180598866;180600045;180600522;180601582;180602642;180603102;180603357;180603749;180604134;180605218;180605727;180606475;180606808;180607083;180607627;180608432;180609326;180609481;180610056;180610190;180610660;180611260;180611429;180612954;180614147;180615288;180615477;180615803;180616381;180619693;180621230	180598325;180598934;180600080;180600593;180601635;180602677;180603125;180603410;180603802;180604175;180605274;180605780;180606528;180606861;180607136;180607680;180608485;180609379;180609534;180610100;180610243;180610713;180611313;180611500;180612989;180614191;180615320;180615623;180615857;180616563;180619770;180622185	+	2846	Col9a3	protein-coding	-1.7593	4.3487	-27.1424	6.29e-15	1.5e-13	24.5472
244059	chr7	73426652;73435735;73441586;73444235;73447135;73449157;73451699;73453099;73454329;73455491;73455774;73463636;73464348;73468456;73469558;73471797;73473012;73474506;73475344;73478659;73480401;73480961;73484409;73490479;73491335;73493425;73497707;73499594;73499939;73500935;73501909;73503381;73504988;73507806;73514090;73515726;73519477;73540772;73541246	73430000;73435978;73441799;73444334;73447313;73449291;73451839;73453227;73454451;73455641;73455912;73463775;73464389;73468631;73469728;73471889;73473108;73474654;73475493;73478730;73480553;73481123;73484597;73490669;73491424;73493641;73497831;73499772;73499983;73501035;73502134;73503514;73505128;73507913;73514151;73515812;73519708;73540904;73541746	-	9071	Chd2	protein-coding	-1.06302	6.97217	-27.5834	4.87e-15	1.22e-13	24.5321
14859	chr1	21240589;21244938;21249751;21257331;21258848;21260048;21262793;21264843	21240659;21245032;21249858;21257382;21258980;21260189;21262924;21265559	+	1450	Gsta3	protein-coding	2.04	3.89697	27.0554	6.62e-15	1.57e-13	24.5274
66771	chr11	60417145;60424774;60432333;60436348;60438443;60441979	60417844;60424833;60432440;60436449;60438573;60445277	+	4400	Gid4	protein-coding	1.22293	5.71102	27.36	5.54e-15	1.36e-13	24.5148
13346	chr1	75360344;75362158;75362313;75362565;75362894;75363471;75365328;75366760;75367009	75360992;75362218;75362408;75362726;75363019;75363691;75365371;75366842;75367716	+	2150	Des	protein-coding	-1.35065	5.32871	-27.2611	5.87e-15	1.42e-13	24.5049
20338	chr12	91806043;91811877;91813832;91814619;91814974;91815766;91816221;91817282;91818219;91820042;91823534;91824820;91825297;91826505;91826652;91830687;91831569;91833055;91841638;91843226;91848959	91810053;91812005;91814004;91814693;91815139;91815914;91816308;91817344;91818296;91820110;91823590;91824974;91825378;91826564;91826705;91830849;91831674;91833222;91841854;91843263;91849157	-	6300	Sel1l	protein-coding	-1.03271	6.37422	-27.4441	5.28e-15	1.3e-13	24.4967
16828	chr7	46845804;46847082;46847596;46848973;46850178;46850885;46851877;46853983;46854977	46845917;46847388;46847745;46849090;46850351;46851058;46851994;46854106;46855627	+	1930	Ldha	protein-coding	1.7851	9.19418	27.6833	4.6e-15	1.16e-13	24.4745
246177	chr11	6506548;6506907;6507869;6508190;6509325;6510148;6510868;6511483;6512161;6512463;6514467;6514752;6515094;6515849;6516079;6516748;6517087;6517570;6517852;6518734;6518979;6520742	6506832;6507061;6507982;6508294;6509469;6510371;6511075;6511649;6512293;6512537;6514537;6514922;6515208;6515994;6516303;6516864;6517197;6517623;6518017;6518827;6519187;6520958	-	3307	Myo1g	protein-coding	2.50352	3.44739	26.9198	7.17e-15	1.67e-13	24.4474
21825	chr2	118111922;118112615;118112970;118114334;118114651;118114948;118115830;118117484;118118162;118118649;118119079;118119322;118119817;118120222;118120836;118121117;118122446;118122874;118123268;118123916;118124120;118125022	118112075;118112709;118113529;118114409;118114853;118115070;118115923;118117657;118118338;118118822;118119206;118119474;118120035;118120329;118120995;118121235;118122680;118123101;118123539;118124013;118124259;118127133	+	5802	Thbs1	protein-coding	-1.69597	4.94252	-27.0695	6.57e-15	1.56e-13	24.4433
74347	chr8	119760587;119762292;119763936;119768066;119771241;119772374;119773272;119778360	119761830;119762471;119764054;119768494;119771385;119772604;119773440;119778416	-	2574	Tldc1	protein-coding	-1.62875	4.41959	-26.9713	6.96e-15	1.63e-13	24.4358
333182	chr7	4751794;4752061;4752724;4752953	4751975;4752161;4752902;4753094	-	604	Cox6b2	protein-coding	1.5685	4.71781	27.0104	6.8e-15	1.6e-13	24.4253
13642	chr8	8617439;8622331;8623148;8639206;8660484	8620976;8622444;8623240;8639489;8660773	-	4319	Efnb2	protein-coding	-2.44527	3.93542	-26.8699	7.38e-15	1.71e-13	24.4222
55983	chr6	101149607;101153219;101154194;101155870;101156914;101169134;101172200;101354394;101362139;101377166	101152068;101153335;101154295;101155932;101157012;101169221;101172447;101354501;101362225;101377897	-	4106	Pdzrn3	protein-coding	-3.24564	2.77474	-27.1266	6.35e-15	1.52e-13	24.4053
74012	chr3	61364507	61368703	+	4197	Rap2b	protein-coding	-2.2323	6.61617	-27.2668	5.85e-15	1.42e-13	24.3982
12417	chr6	51470616;51471816;51475231;51478438;51481724;51482480	51470739;51471868;51475373;51478600;51481818;51483704	+	1803	Cbx3	protein-coding	1.51839	5.31561	27.0601	6.6e-15	1.57e-13	24.3864
269855	chr7	4925844;4926490;4926974;4927552;4927896;4928385;4929237;4930002;4933135;4936263;4936908;4937465;4942714;4943551	4925979;4926516;4927282;4927665;4928009;4928693;4929554;4930163;4933452;4936826;4937222;4937632;4942872;4944797	+	4260	Ssc5d	protein-coding	-2.63744	3.53696	-26.7995	7.7e-15	1.77e-13	24.3769
269643	chr5	36868570;36922968;36926285;36927531;36931236;36940097;36947068;36949553;36952351	36868890;36923065;36926450;36927643;36931413;36940261;36947237;36949644;36955078	+	4031	Ppp2r2c	protein-coding	-1.24856	5.17848	-26.9989	6.84e-15	1.61e-13	24.3614
11634	chr10	78030031;78031821;78034381;78034586;78035657;78036685;78037873;78039662;78039931;78041500;78042061;78042517;78042902;78043389	78030324;78031889;78034489;78034707;78035833;78036784;78037988;78039742;78040079;78041613;78042135;78042672;78043076;78043580	-	1929	Aire	protein-coding	3.00241	4.13556	26.7679	7.84e-15	1.8e-13	24.36
66422	chr7	127256959;127259358;127260523	127257336;127259468;127260667	-	634	Dctpp1	protein-coding	1.21253	7.14945	27.3064	5.72e-15	1.39e-13	24.3527
69710	chr7	101348069;101367021;101372956;101378122;101384862;101385526;101386149;101386392;101386790;101387106;101387987;101388614;101390064;101391836;101393447;101394388;101394734;101396061;101398296;101398696;101399479;101399983;101400128;101400392;101400883;101401390;101401623;101401792;101402059;101403965;101404280;101408047;101409114;101409291;101410920;101411304	101348199;101367098;101373501;101378532;101385040;101385616;101386273;101386541;101386859;101387226;101388189;101388720;101390263;101391921;101393629;101394467;101394908;101396195;101398431;101398798;101399674;101400034;101400291;101400604;101400988;101401537;101401709;101401860;101402176;101404078;101404425;101408129;101409164;101409354;101411069;101412586	+	6354	Arap1	protein-coding	-1.23271	6.69686	-27.2283	5.98e-15	1.44e-13	24.342
56086	chr2	30061996;30066474;30068269;30068960;30069327;30069518;30070185;30070441;30070919	30062280;30066893;30068326;30069102;30069430;30069631;30070355;30070587;30072577	+	3101	Set	protein-coding	1.06024	9.1777	27.4609	5.23e-15	1.29e-13	24.3381
104156	chr16	22381313;22386757;22392655;22392987;22399320;22401672;22411633;22412845;22435877;22436020;22436201;22436438;22439517	22383691;22386858;22392824;22393055;22399379;22401931;22411920;22412974;22435927;22436067;22436288;22436560;22439570	-	3822	Etv5	protein-coding	1.03944	7.09699	27.2553	5.89e-15	1.43e-13	24.3233
78244	chr15	10446763;10447696;10449576;10451555;10452206;10454770;10459955;10461120;10461876;10462223;10463887;10470265	10447226;10447771;10449748;10451597;10452364;10454857;10460106;10461424;10461998;10462346;10463980;10470516	-	2053	Dnajc21	protein-coding	1.06276	6.84283	27.2152	6.03e-15	1.45e-13	24.3173
59041	chr1	93620751;93623396;93624553;93625034;93625461;93625781;93626051;93627025;93627654;93629034;93635298;93635547	93622526;93623532;93624624;93625148;93625606;93625966;93626208;93627133;93627710;93629264;93635383;93635727	-	3254	Stk25	protein-coding	-1.02528	6.99158	-27.2279	5.99e-15	1.44e-13	24.3154
17180	chr4	130944385;130945829;130949935;130951289;130951839;130952833;130954336;130954967	130944529;130946175;130950157;130951414;130952255;130952985;130954416;130955476	+	2002	Matn1	protein-coding	-2.0478	4.11067	-26.7041	8.15e-15	1.85e-13	24.309
14050	chr4	132639046;132656693;132657578;132661895;132667155;132670189;132672896;132689705;132692962;132694747;132699030;132701021;132704352;132706963;132709945;132711842;132719212;132721279	132639155;132656788;132657616;132661938;132667234;132670255;132673032;132689790;132693145;132694883;132699113;132701110;132704410;132707123;132710059;132711963;132719312;132724763	+	5197	Eya3	protein-coding	-1.19468	6.05593	-27.0374	6.69e-15	1.58e-13	24.2847
56306	chr6	148921057;148926013;148928509;148930551;148933002;148946292	148923030;148926163;148928635;148930650;148933148;148946432	-	2640	Fam60a	protein-coding	1.47837	5.86419	26.9949	6.86e-15	1.61e-13	24.2829
73139	chr11	62524944;62527492;62533885;62536282;62538856	62525287;62527606;62533954;62536380;62539261	-	1034	Cenpv	protein-coding	1.29776	5.21033	26.878	7.35e-15	1.7e-13	24.2823
26398	chr11	65688244;65691728;65693422;65696288;65706984;65709932;65712178;65719484;65735192;65756269;65788136	65690804;65691773;65693570;65696365;65707111;65709983;65712297;65719603;65735366;65756371;65788297	-	3694	Map2k4	protein-coding	-1.15824	6.77677	-27.1204	6.37e-15	1.52e-13	24.2682
54427	chr10	78042287;78045875;78049842;78050016;78050598;78050916;78051831;78051992;78052712;78053929;78054972;78056845;78057268;78059647;78063187	78042388;78045988;78049911;78050203;78050684;78050960;78051910;78052104;78052883;78054016;78055066;78056920;78057407;78059732;78063615	+	1885	Dnmt3l	protein-coding	0.90807	8.51997	27.2859	5.79e-15	1.41e-13	24.2632
23802	chr8	93971588;93974059;93974736;93976034;93980318;93983312;93984834;93985339;93987374;93987719;93999098;94000305;94005133;94012219	93973314;93974243;93974819;93976168;93980421;93983502;93984944;93985472;93987506;93987759;93999250;94000469;94005225;94012640	-	3678	Amfr	protein-coding	-1.1139	5.99586	-26.9902	6.88e-15	1.61e-13	24.2603
108153	chr9	90162978;90171474;90173622;90174472;90177783;90178153;90179323;90180625;90185736;90186460;90186922;90188269;90188659;90189619;90190848;90191365;90191836;90192381;90193025;90195158;90195677;90195931;90197000;90199714	90163314;90171829;90173787;90174650;90177866;90178277;90179472;90180771;90185880;90186552;90187067;90188438;90188792;90189739;90191092;90191500;90191962;90192594;90194269;90195310;90195850;90196077;90197162;90200102	+	5346	Adamts7	protein-coding	-1.86465	4.78686	-26.7177	8.08e-15	1.84e-13	24.2525
85031	chr16	38396117;38397339;38400876;38405537;38407592;38409595;38412086;38414769;38415318;38417060;38432804	38396535;38397503;38400984;38405626;38407759;38409684;38412187;38414877;38415495;38417261;38433145	-	1974	Pla1a	protein-coding	2.18217	3.62101	26.5395	8.98e-15	2.01e-13	24.229
218294	chr13	64192545;64205271;64209107;64209926;64210195;64215500;64216212;64219886;64220680;64225572;64243634;64246525;64247228;64248405;64274591	64196675;64205417;64209204;64210085;64210333;64215730;64216299;64219948;64220746;64225648;64243726;64246600;64247318;64248538;64274988	-	5993	Cdc14b	protein-coding	1.43453	4.86583	26.6795	8.27e-15	1.88e-13	24.2048
217335	chr11	116142285;116144433;116145425;116145623;116145835;116146436;116146704;116147708;116147904;116148121;116148813;116149119;116149367;116150789;116151019;116151422;116152477;116153953;116154707;116154991;116155384;116155958;116157689;116158889;116160062;116161425;116163318;116164663;116165832;116167133;116167552	116143466;116144542;116145542;116145760;116146011;116146621;116146826;116147826;116148043;116148228;116149019;116149219;116149522;116150847;116151113;116151517;116152947;116154052;116154864;116155126;116155500;116156035;116157827;116158939;116160110;116161509;116163359;116164690;116165912;116167228;116168178	-	5373	Fbf1	protein-coding	-1.18694	5.7757	-26.8466	7.49e-15	1.73e-13	24.1979
26943	chr2	163623273;163626253;163627872;163629127;163630926;163632106;163634435;163636811;163639166;163644998	163625579;163626477;163628052;163629217;163631095;163632243;163634514;163637004;163639327;163645143	-	3694	Serinc3	protein-coding	-1.24095	7.23926	-27.0414	6.68e-15	1.58e-13	24.1869
330671	chr7	141061274;141063837;141064278;141064460;141064641;141064807;141065054;141065327;141066932;141067110;141067327;141067520;141067700;141067873;141070411;141070788;141071042;141071208;141071637;141071996	141061424;141063940;141064373;141064555;141064731;141064907;141065121;141065405;141066998;141067244;141067436;141067620;141067800;141068761;141070694;141070941;141071114;141071361;141071763;141072119	+	3105	B4galnt4	protein-coding	1.92754	4.35791	26.529	9.04e-15	2.02e-13	24.1781
18451	chr10	59323296;59337054;59339296;59342684;59343657;59348181;59350404;59352083;59354340;59361861;59365289;59367289;59369241;59369587;59371004	59323476;59337156;59339392;59342835;59343794;59348420;59350600;59352259;59354410;59361960;59365342;59367354;59369309;59369683;59373304	+	4043	P4ha1	protein-coding	1.16451	6.55661	26.9409	7.08e-15	1.65e-13	24.1745
20392	chr6	4674350;4677163;4678067;4689579;4690469;4691429;4694022;4707074;4711308;4717921;4719374;4730006;4746980	4674632;4677233;4678110;4689767;4690495;4691640;4694184;4707272;4711380;4718078;4719496;4730113;4747204	-	1875	Sgce	protein-coding	-1.50618	4.77689	-26.5963	8.68e-15	1.95e-13	24.1688
68839	chr15	36477668;36483981;36485795;36495877;36496727	36479473;36484139;36486127;36495993;36496791	-	2480	Ankrd46	protein-coding	-1.49079	4.7629	-26.5847	8.74e-15	1.96e-13	24.1629
11783	chr10	90989311;90995648;90997212;90999652;91001010;91009124;91014060;91018966;91020656;91023720;91031549;91036910;91039785;91048086;91049358;91054380;91055915;91058311;91059573;91060048;91061698;91062104;91067081;91077534;91079447;91079887;91082183	90991596;90995794;90997337;90999777;91001129;91009249;91014176;91019085;91020781;91023848;91031710;91037035;91039916;91048211;91049484;91054564;91056028;91058442;91059740;91060286;91061829;91062216;91067264;91077731;91079636;91080131;91082743	-	6557	Apaf1	protein-coding	-1.35086	7.47505	-27.0205	6.76e-15	1.59e-13	24.1596
665700	chr2	31314415;31333855;31335414;31336507;31343056;31344012;31344469;31346462;31349978;31350519;31352609;31353716;31354166;31354622;31356224;31360881;31361797;31362158;31364217;31368951;31369174;31370781;31378241;31380228;31381042;31382327;31383650;31384054;31384839;31385150;31386611;31388167;31389003;31389255;31389761;31390940;31391430;31392130;31392962;31394689;31396021;31396644;31397476;31397689;313…	31314676;31333925;31335572;31336629;31343227;31344118;31344589;31346725;31350122;31350640;31352881;31353857;31354293;31354735;31356373;31361069;31361892;31362285;31364361;31369063;31369330;31370946;31378368;31380482;31381128;31382521;31383827;31384187;31384965;31385304;31386889;31388445;31389111;31389424;31389845;31391099;31391526;31392225;31393138;31394846;31396144;31396819;31397572;31397808;313…	+	15679	Hmcn2	protein-coding	-1.67043	5.30562	-26.6661	8.33e-15	1.89e-13	24.1556
319182	chr13	23542972	23543352	-	381	Hist1h2bh	protein-coding	1.8766	4.93023	26.5842	8.75e-15	1.96e-13	24.1511
239759	chr16	21953817;21958781;21962145;21965954;21967985;21974058;21976233;21981336;21983901;21995321	21956177;21958954;21962256;21966049;21968152;21974147;21976334;21981444;21984268;21995542	-	3802	Liph	protein-coding	1.28771	6.10811	26.8141	7.63e-15	1.76e-13	24.1417
241639	chr2	132904179;132911178;132915191;132915901;132917464;132918506;132922797;132924957;132925687;132933056;132934821;132936016;132939282;132941937;132945323	132906841;132911319;132915315;132916122;132917570;132918630;132922846;132925088;132925794;132933158;132935034;132936162;132939515;132942105;132946036	-	5255	Fermt1	protein-coding	-3.71127	3.36898	-26.4639	9.4e-15	2.08e-13	24.1228
226251	chr19	57033264;57039407;57040487;57041415;57041915;57042997;57043796;57044881;57046925;57049462;57051130;57059085;57061253;57063766;57068091;57068860;57073855;57077414;57079813;57083516;57118752;57132862;57134582;57152273;57155152;57173325;57197299;57215714	57037337;57039487;57040561;57041422;57041975;57043061;57043898;57044972;57047065;57049509;57051234;57059204;57061382;57063801;57068246;57068937;57073902;57077497;57079871;57083603;57119009;57132955;57134708;57152382;57155335;57173459;57197492;57216032	-	7073	Ablim1	protein-coding	-1.27353	5.33288	-26.6347	8.49e-15	1.91e-13	24.1211
74762	chr17	29827958;29832913;29833222;29837992;29838437;29839805;29840797;29842119;29842845;29846321;29849157;29849640;29850492;29852442;29857590;29887447	29832399;29833021;29833352;29838126;29838589;29839982;29840948;29842406;29843141;29846650;29849426;29849772;29850688;29852616;29857729;29887882	-	7566	Mdga1	protein-coding	-1.8065	4.5628	-26.4577	9.43e-15	2.08e-13	24.1152
384783	chr8	10986961;11004470	10987014;11008430	-	4015	Irs2	protein-coding	-1.85248	4.89615	-26.5006	9.19e-15	2.05e-13	24.1074
21814	chr5	107106570;107118419;107121360;107130461;107132733;107136919;107137530;107139769;107140384;107142357;107148026;107149790;107154252;107177805;107214893;107266194;107289255	107109757;107118526;107121407;107130578;107133029;107137077;107137670;107139921;107140712;107142546;107148173;107149958;107154435;107177942;107215077;107266350;107289595	-	6053	Tgfbr3	protein-coding	-2.04354	4.78073	-26.4523	9.46e-15	2.08e-13	24.0961
216456	chr10	128194635;128199182;128199637;128200173;128200886;128201206;128201559;128203823;128204075;128204661;128204861;128205088;128206872;128207298;128207561;128208591;128209106;128209288	128194907;128199281;128199758;128200302;128200965;128201369;128201617;128203855;128204133;128204727;128204911;128205264;128207003;128207390;128207622;128208667;128209169;128210004	+	2460	Gls2	protein-coding	1.40116	5.26643	26.5781	8.78e-15	1.96e-13	24.0942
18802	chr1	74542889;74544360;74547913;74548105;74549175;74551020;74551988;74554490;74555943;74557720;74560290;74561842;74562055;74562714;74563451;74564377;74565032;74565260;74565747	74543028;74544650;74547968;74548263;74549403;74551149;74552219;74554691;74556087;74557872;74560493;74561937;74562223;74562830;74563623;74564512;74565181;74565367;74565977	+	3121	Plcd4	protein-coding	-1.81247	3.92823	-26.3355	1.02e-14	2.21e-13	24.0932
381605	chr4	46604390;46606383;46606970;46608983;46613948;46615027;46616254;46620447;46628341;46629876;46637589;46646117;46649669	46605968;46606504;46607155;46609103;46614424;46615208;46616364;46620821;46628537;46630009;46637736;46646258;46650199	-	4305	Tbc1d2	protein-coding	-1.53859	4.95608	-26.475	9.34e-15	2.07e-13	24.075
13716	chr8	70539675;70572863;70578837;70579093;70581555;70583872;70585157;70585554;70590520;70590694;70591370;70591498	70539841;70572910;70578958;70579256;70581820;70583996;70585235;70586028;70590580;70590865;70591414;70592858	+	3085	Ell	protein-coding	-1.29358	6.30443	-26.7228	8.06e-15	1.84e-13	24.0689
66889	chrX	139563340;139610620;139642286;139658816;139663586;139664488;139665372;139671735	139563883;139611289;139642533;139658887;139663668;139664584;139665540;139673145	+	3294	Rnf128	protein-coding	-1.53009	5.73288	-26.5974	8.68e-15	1.95e-13	24.0581
208198	chr10	80642617;80643826;80644262;80644603;80645340;80646381;80647705;80648560;80656130	80643691;80643972;80644349;80644795;80645537;80646486;80647861;80648679;80657071	-	3026	Btbd2	protein-coding	-1.44073	6.04497	-26.6563	8.38e-15	1.9e-13	24.0579
66988	chr5	45493374;45495166;45496920;45497329;45498434;45500403;45503380;45504723;45506174;45507107;45509438;45511108;45511881	45493561;45495281;45496974;45497434;45498593;45500567;45503538;45504847;45506262;45507209;45509517;45511217;45512691	+	2267	Lap3	protein-coding	0.97752	7.90056	26.8924	7.29e-15	1.69e-13	24.0535
11676	chr11	78324198;78324604;78324909;78325049;78325329;78325642;78325935;78326262	78324513;78324815;78324963;78325209;78325412;78325816;78326134;78326760	+	1702	Aldoc	protein-coding	3.03939	3.49202	26.2471	1.07e-14	2.31e-13	24.0439
21872	chr7	65296165;65299670;65301066;65302744;65306370;65311004;65312334;65312555;65314093;65314659;65317987;65318364;65319250;65322280;65322494;65322955;65323989;65326262;65328924;65329626;65336032;65336497;65337043;65340150;65342617;65343615;65354832;65370810	65297667;65299813;65301283;65303218;65306536;65311231;65312431;65313424;65314332;65315009;65318087;65318574;65319332;65322375;65322678;65323174;65324097;65326412;65329029;65329765;65336179;65336665;65337146;65340426;65342719;65343739;65354888;65371244	-	7114	Tjp1	protein-coding	-0.978257	8.20588	-26.8976	7.26e-15	1.69e-13	24.0414
14680	chr18	67088336;67133826;67134213;67135312;67135519;67191370;67211048;67212225;67213072;67213488;67217070;67218504;67222569	67088873;67133970;67134285;67135366;67135638;67191467;67211102;67212298;67213130;67213608;67217200;67218571;67226792	+	5761	Gnal	protein-coding	-2.18819	4.12511	-26.2329	1.08e-14	2.32e-13	24.0253
12822	chr10	77052179;77054155;77054784;77055579;77057369;77058699;77059105;77059258;77059895;77060369;77063979;77064537;77065235;77066950;77067379;77067632;77068390;77069436;77069820;77069950;77070961;77071311;77071604;77072027;77072942;77073740;77074350;77076148;77077159;77077684;77077999;77078276;77078457;77079261;77080679;77081149;77085267;77087376;77088870;77095991;77112959;77166290;77166439	77053407;77054270;77054981;77055827;77057401;77058830;77059178;77059402;77060023;77060412;77064041;77064579;77065303;77067024;77067432;77067658;77068464;77069498;77069846;77069979;77071050;77071346;77071675;77072062;77072968;77073802;77074481;77076174;77077221;77077842;77078052;77078353;77078519;77079287;77080864;77081225;77085396;77087429;77088956;77096535;77113705;77166360;77166530	-	5791	Col18a1	protein-coding	-1.3764	9.04634	-26.9317	7.12e-15	1.66e-13	24.0223
23849	chr13	5861489;5864768;5866639;5867232	5861842;5865344;5866762;5870393	+	4217	Klf6	protein-coding	-1.32975	6.93402	-26.7259	8.04e-15	1.84e-13	24.0161
544963	chr13	95627177;95628947;95629989;95632024;95635464;95637718;95646762;95648178;95657803;95660118;95660999;95661587;95664063;95665593;95668368;95671229;95672985;95673685;95675314;95682153;95682910;95684854;95689701;95707878;95716057;95721513;95724546;95729463;95731280;95732891;95733884;95746438;95749993;95763246;95837824;95891664	95628120;95629055;95630126;95632184;95635676;95637805;95646903;95648280;95657935;95660350;95661083;95661727;95664287;95665756;95668517;95671437;95673054;95673756;95675397;95682323;95683052;95685021;95689791;95708041;95716181;95721673;95724709;95729550;95731458;95733004;95733951;95746514;95750070;95763402;95837923;95891922	-	5771	Iqgap2	protein-coding	1.24285	5.15916	26.3904	9.82e-15	2.15e-13	23.9873
12840	chr4	121039566;121040965;121042294;121042416;121043696;121043862;121043995;121044275;121044665;121044823;121044999;121045141;121045484;121045926;121046070;121046229;121049662;121050076;121050355;121051214;121051651;121051968;121052227;121052358;121052581;121052753;121052891;121053058;121053439;121053770;121054253;121054596	121039786;121041039;121042329;121042478;121043749;121043897;121044018;121044328;121044718;121044870;121045055;121045194;121045537;121045979;121046123;121046282;121049715;121050129;121050408;121051258;121051704;121052021;121052280;121052429;121052616;121052797;121052923;121053204;121053493;121053958;121054330;121055325	+	2746	Col9a2	protein-coding	1.42982	4.92806	26.3299	1.02e-14	2.21e-13	23.9822
65247	chr1	91540565;91541080;91544151;91546928;91552054;91554751	91540864;91541175;91544297;91547230;91552439;91559590	+	6072	Asb1	protein-coding	-1.27303	5.27322	-26.3801	9.88e-15	2.16e-13	23.9707
68479	chr15	81864516;81870332;81871166;81871813	81865892;81870498;81871189;81871892	-	1648	Phf5a	protein-coding	1.29339	5.80949	26.4737	9.34e-15	2.07e-13	23.9632
11820	chr16	84954436;84962722;84965670;84971408;84978064;85013627;85015232;85024853;85025423;85030232;85040251;85043576;85056324;85079840;85082776;85103206;85120530;85173502	84955432;84962868;84965770;84971461;84978285;85013726;85015360;85025011;85025497;85030365;85040307;85043743;85056526;85080033;85082888;85103335;85120697;85173707	-	3357	App	protein-coding	-1.74354	4.86057	-26.2159	1.09e-14	2.34e-13	23.9315
116904	chr7	81057600;81063949;81067879;81076873;81077546;81092147;81094907;81095402;81095658;81098747;81100171;81100908;81103345;81103971	81057772;81063987;81068000;81076990;81078833;81094184;81095054;81095529;81095693;81099021;81100259;81101131;81103393;81105612	+	6369	Alpk3	protein-coding	2.02009	4.899	26.211	1.09e-14	2.34e-13	23.9288
320706	chr2	157010442;157020190;157022817;157023797;157027387;157029480;157030519;157030788;157033258;157037170;157039827;157041894;157053519;157060188;157078229	157018499;157021537;157022887;157023868;157027638;157029647;157030623;157031018;157033383;157037310;157041002;157041956;157053677;157060412;157079265	-	13232	Soga1	protein-coding	-1.38376	5.94321	-26.4204	9.65e-15	2.12e-13	23.9207
18519	chr17	53566971;53584126;53610864;53624352;53629324;53632537;53638352;53641193;53644614;53648747;53653022;53654439;53659318;53660029;53663535;53665406;53665653;53665823;53670675	53567578;53584179;53610990;53624497;53629416;53632718;53638543;53641299;53644736;53648883;53653230;53654565;53659428;53660172;53663649;53665442;53665716;53665907;53672721	+	4708	Kat2b	protein-coding	1.36989	6.33645	26.4904	9.25e-15	2.06e-13	23.9202
223978	chr16	11803721;11828175;11887578;11909266	11805583;11828597;11887796;11909423	-	2663	Cpped1	protein-coding	-1.33823	5.22067	-26.2805	1.05e-14	2.27e-13	23.917
380711	chr11	74383483;74388319;74388783;74392220;74393045;74393369;74395779;74397357;74405723;74407311;74407888;74412297;74414391;74416232;74422430;74425182;74425912;74435701;74436924;74437431;74438264;74441750;74484887;74567216;74589960	74387511;74388357;74388859;74392346;74393162;74393482;74395897;74397494;74405857;74407397;74407959;74412452;74414520;74416332;74422513;74425235;74425990;74435804;74437136;74437463;74438308;74441785;74484971;74567251;74590158	-	6410	Rap1gap2	protein-coding	-1.6327	4.68504	-26.1419	1.14e-14	2.41e-13	23.9021
73945	chr8	79639676;79643754;79646298;79651006;79651672;79653363;79655660;79658909;79659184;79659398;79661038;79663725;79663922;79664981;79666716;79667601;79668437;79669274;79669924;79671046;79672768	79640064;79643837;79646348;79651052;79651744;79653444;79655792;79658963;79659301;79659462;79661135;79663825;79664111;79665143;79666839;79667656;79668511;79669412;79670178;79671086;79677755	+	7327	Otud4	protein-coding	-0.987643	9.05013	-26.7301	8.02e-15	1.84e-13	23.8958
11740	chrX	36795652;36796843;36797736;36798387	36795841;36797329;36797876;36798806	+	1238	Slc25a5	protein-coding	1.11646	8.3491	26.6522	8.4e-15	1.9e-13	23.882
11674	chr7	126795234;126795613;126795950;126796217;126796595;126796854;126797337;126797644;126797974;126799045;126800288	126795514;126795812;126796124;126796300;126796755;126796908;126797548;126797776;126798126;126799254;126800447	-	1824	Aldoa	protein-coding	1.37837	10.3438	26.7692	7.84e-15	1.8e-13	23.8644
18481	chrX	143518591;143665745;143671013;143672602;143678092;143693287;143709648;143712278;143713894;143715136;143716111;143733072;143735257;143743938;143764962;143765268;143766794;143774362;143774938;143789310;143791235	143518763;143665843;143671043;143672893;143678151;143693488;143709748;143712340;143713938;143715289;143716148;143733203;143735422;143744001;143765010;143765380;143766911;143774461;143775134;143789447;143797796	+	8897	Pak3	protein-coding	-2.78988	3.03539	-25.9863	1.25e-14	2.63e-13	23.8489
72046	chr11	5713417;5722802;5723111;5726348;5726831;5741097;5761881	5718263;5722840;5723161;5726418;5726857;5741176;5762376	-	5611	Urgcp	protein-coding	-1.28403	4.95927	-26.1184	1.16e-14	2.44e-13	23.8461
23834	chr11	98907889;98908151;98908637;98910187;98910578;98911388;98912159;98913875;98915088;98916954;98919203;98920673;98921116	98907981;98908319;98908830;98910471;98910777;98911563;98912265;98914014;98915188;98917018;98919405;98920813;98923942	+	4701	Cdc6	protein-coding	1.21366	6.53785	26.4001	9.77e-15	2.14e-13	23.8418
54132	chr19	40222239;40223051;40230507;40243406;40249619;40251910;40271346	40222771;40223168;40230658;40243599;40249703;40252061;40271616	-	1505	Pdlim1	protein-coding	-1.21943	6.35261	-26.3679	9.96e-15	2.17e-13	23.8417
67469	chr9	122351616;122365136;122367889;122375906;122377859;122378822;122379513	122351839;122365221;122368261;122376060;122377970;122379008;122381523	+	3148	Abhd5	protein-coding	-1.14412	5.45865	-26.1948	1.11e-14	2.35e-13	23.8295
16498	chr4	152390740;152393742;152394290;152394929;152395125;152396756;152400948;152401925;152403036;152404600;152407127;152411985;152412817;152434782;152435805;152448678;152477401	152393124;152393830;152394410;152395023;152395245;152396841;152401034;152401968;152403080;152404644;152407206;152412022;152412860;152434823;152435937;152448855;152477549	-	3782	Kcnab2	protein-coding	-2.41209	3.06967	-25.9147	1.31e-14	2.73e-13	23.8262
14828	chr2	34772090;34772559;34773170;34773821;34774028;34774535;34775066;34775551	34772446;34772790;34773307;34773933;34774418;34774772;34775233;34776529	+	2616	Hspa5	protein-coding	0.935804	9.78003	26.6714	8.3e-15	1.88e-13	23.8255
73102	chr13	34179158;34192156;34193249;34193394;34195252;34197802;34203917;34221903;34298997;34305158;34344159	34183311;34192279;34193272;34193426;34195484;34197904;34204044;34222071;34299151;34305261;34345182	-	6251	Slc22a23	protein-coding	-1.65363	3.96004	-25.888	1.33e-14	2.75e-13	23.8137
107338	chr19	46152558;46163520;46170657;46246089;46252114;46253987;46254557;46255653;46259104;46259573;46260713;46261621;46262434;46264779;46265178;46265587;46266025;46267203;46267993;46268391;46268779;46269745;46270258;46270674;46271555;46271707;46271986;46272175;46272501;46279210;46279912;46280177;46280538;46283035;46283320;46283622;46284005;46284250;46284705;46285660	46152792;46163625;46170723;46246220;46252232;46254095;46254617;46255707;46259251;46259796;46260878;46261832;46262532;46264973;46265367;46265727;46266113;46267405;46268116;46268516;46268861;46269981;46270351;46270850;46271619;46271830;46272057;46272269;46272654;46279435;46280072;46280423;46280743;46283185;46283450;46283723;46284118;46284430;46284833;46286510	+	6401	Gbf1	protein-coding	-1.53822	6.34418	-26.2966	1.04e-14	2.25e-13	23.8057
319162	chr11	58954685	58956674	+	1990	Hist3h2a	protein-coding	1.29716	6.8209	26.3783	9.89e-15	2.16e-13	23.8057
66570	chr15	82233762;82239293;82239879;82241327;82244133;82244623	82234509;82239384;82239958;82241419;82244336;82244747	-	1342	Cenpm	protein-coding	1.40589	5.59723	26.1733	1.12e-14	2.37e-13	23.8026
18094	chr12	56611393;56612912	56612279;56613284	-	1260	Nkx2-9	protein-coding	-2.64943	3.51821	-25.8205	1.39e-14	2.86e-13	23.7931
328329	chr13	102732488;102739198;102741946;102750514;102751381;102754056;102758502;102759023;102760960;102761295;102767871;102769769;102770723;102772455;102774186;102781160;102783345;102787317;102788963;102793969;102796086;102798046;102804642;102810501;102853831;103025522;103140163;103171403;103333836	102738897;102739379;102742082;102750636;102751610;102754256;102758737;102759150;102761072;102761417;102767972;102769934;102770855;102772593;102774394;102781245;102783412;102787449;102789064;102794178;102796161;102798203;102804720;102810570;102853919;103025553;103140287;103171556;103334492	-	10671	Mast4	protein-coding	-1.90155	4.36593	-25.896	1.33e-14	2.75e-13	23.7898
21987	chr10	31332380;31338185;31341140;31346611;31357872;31379215;31445712	31332969;31338245;31341178;31346712;31358020;31379330;31445921	-	1267	Tpd52l1	protein-coding	1.88373	3.64714	25.7992	1.41e-14	2.88e-13	23.7777
14594	chr2	35400179;35407945;35413326;35414219;35416472;35422180;35423232;35432514;35461195	35402802;35408082;35413427;35414284;35416507;35422268;35423412;35432632;35461425	-	3586	Ggta1	protein-coding	-1.14782	6.06381	-26.2208	1.09e-14	2.34e-13	23.7768
17865	chr2	163054635;163059501;163061524;163062457;163064280;163068156;163072624;163074382;163075636;163077787;163079594;163080718;163082550;163083166	163054848;163059594;163061595;163062549;163064500;163068315;163072914;163074804;163075775;163077889;163079707;163080822;163082699;163084687	+	3702	Mybl2	protein-coding	1.32447	7.72797	26.4143	9.68e-15	2.13e-13	23.7667
268721	chr14	20707552;20710637;20711028;20711458;20711791;20712037;20712242;20712976;20713330;20713883;20715952;20716222;20716499;20716910;20717868;20718427;20718760;20718997;20719380;20719813;20721171;20721870;20722143;20722460;20722828;20723139	20708056;20710790;20711122;20711630;20711898;20712118;20712362;20713177;20713505;20714867;20716083;20716401;20716682;20717008;20717992;20718667;20718918;20719225;20719672;20720036;20721659;20722029;20722319;20722579;20723006;20723619	+	6073	Zswim8	protein-coding	-1.21158	6.07997	-26.2044	1.1e-14	2.35e-13	23.7664
381290	chr1	133702674;133711632;133715054;133716505;133717788;133718700;133719324;133726457;133727723;133728697;133729717;133730369;133731663;133732226;133735048;133736616;133737990;133738538;133739163;133739914;133753089	133706996;133711822;133715230;133716612;133717999;133718913;133719515;133726563;133727810;133728876;133729948;133730610;133731905;133732440;133735209;133736651;133738118;133738663;133739420;133740111;133753747	-	8292	Atp2b4	protein-coding	-1.23377	5.99934	-26.1828	1.11e-14	2.36e-13	23.7618
68875	chr1	132356315;132358903;132360275;132380657;132390977	132357817;132359038;132361215;132381181;132391281	-	3410	Tmcc2	protein-coding	-1.69103	3.7882	-25.7836	1.42e-14	2.9e-13	23.7606
20890	chr18	34542328;34542522;34542844;34544782;34545502;34547094	34542436;34542555;34542982;34544907;34545644;34548061	+	1519	Wnt8a	protein-coding	-2.348	3.3272	-25.76	1.44e-14	2.92e-13	23.7535
64294	chr1	85894510;85903010;85905214;85906422;85907008;85907547	85894789;85903150;85905402;85906532;85907158;85908698	+	2024	Itm2c	protein-coding	-1.11655	6.21461	-26.2038	1.1e-14	2.35e-13	23.7498
101437	chr7	133720935;133722149;133723042;133724400;133725204;133733968;133734209;133737189;133742429;133748843;133759400;133776602	133721396;133722330;133723229;133724549;133725395;133734126;133734308;133737434;133742801;133749036;133759913;133776803	-	2962	Dhx32	protein-coding	0.965534	6.70121	26.2732	1.05e-14	2.28e-13	23.744
21452	chr11	3917077;3919290;3922011;3923396;3923702;3924941;3926000;3927390;3931393;3931927;3931976	3917709;3919405;3922176;3923582;3923874;3925102;3926169;3927582;3931587;3931961;3932078	-	2133	Tcn2	protein-coding	-1.635	5.07476	-25.9527	1.28e-14	2.67e-13	23.7385
67080	chr1	52925127;52952615	52925734;52952840	-	834	1700019D03Rik	protein-coding	2.0173	3.55803	25.7139	1.48e-14	2.98e-13	23.7287
14228	chr6	128430107;128432422;128433106;128433526;128433703;128434305;128434752;128435714;128436570;128438406	128430880;128432661;128433291;128433609;128433793;128434461;128434872;128435856;128436714;128438631	-	2167	Fkbp4	protein-coding	0.83469	9.56578	26.4818	9.3e-15	2.06e-13	23.716
319482	chr7	28129466;28129822;28131419;28137063;28139740;28142223;28143832;28146621;28147316;28150653;28152718;28153292;28154189;28155144;28156527;28157535;28159337;28162591;28164269;28164645	28129482;28129878;28131768;28137633;28140344;28142784;28144424;28147206;28147515;28150794;28153055;28153865;28154805;28155687;28157095;28158108;28159536;28162974;28164540;28164811	+	7922	9530053A07Rik	protein-coding	-1.80085	5.03681	-25.8986	1.32e-14	2.75e-13	23.7139
20815	chr17	28589592;28591201;28592218;28594170;28598902;28599471;28600243;28600869;28602688;28603438;28605299;28606307;28607084;28608646;28621977;28622400	28590241;28591293;28592287;28594277;28599002;28599869;28600456;28600894;28602853;28603544;28605386;28606394;28607192;28608764;28622037;28622454	-	2454	Srpk1	protein-coding	0.966623	7.27091	26.2794	1.05e-14	2.27e-13	23.707
11630	chr10	43950307;43956649;43958248;43958814;43961429;43964578;43966301;43967465;43967689;43973658;43973894;43975027;43976798;43979481;43986251;43989094;43992455;43992658;43997052;44003428	43951957;43956811;43958406;43958937;43961568;43964707;43966413;43967497;43967815;43973803;43974020;43975184;43976833;43979607;43986390;43989253;43992573;43992705;43999347;44004846	-	7416	Aim1	protein-coding	-2.43166	4.17645	-25.7011	1.49e-14	3e-13	23.699
108086	chr5	142990893;142993502;143015624;143027946;143068317;143068846;143075727;143077427;143080224;143080963;143085871;143087519;143089743;143090120;143092995;143098379;143112899	142992965;142993571;143015846;143028043;143068395;143068994;143075864;143077477;143080363;143081077;143086035;143087621;143089819;143090929;143093125;143098505;143113020	-	4671	Rnf216	protein-coding	-1.00196	6.57268	-26.1675	1.12e-14	2.38e-13	23.6909
23830	chr1	92934408;92937945;92939323;92940283;92942482;92943300;92943679;92944695;92945017;92946774;92947215;92947509	92935014;92938076;92939519;92940500;92942623;92943466;92943941;92944897;92945278;92946973;92947260;92947948	+	2877	Capn10	protein-coding	-1.20386	5.42201	-25.9652	1.27e-14	2.66e-13	23.6907
236899	chrX	93654863;93675112;93702085;93706558;93717785;93720179;93731677;93734765;93746219	93655216;93675476;93702184;93706674;93717936;93720257;93731819;93734953;93749948	+	5229	Pcyt1b	protein-coding	1.68547	4.50917	25.7653	1.44e-14	2.92e-13	23.6836
71069	chr8	47180048;47191633;47191839;47203121;47287880;47352031	47186572;47191686;47194104;47203273;47289402;47352348	-	10839	Stox2	protein-coding	-1.36755	4.54746	-25.7561	1.44e-14	2.92e-13	23.6687
56210	chr1	38052786;38053616;38053840;38054084;38054745;38055291;38056264;38056717;38057674;38059122;38063115;38067500;38071343;38074315;38079290;38083704;38085545;38087971;38092063;38098853;38107568;38108404;38129462	38053198;38053718;38053996;38054295;38054865;38055524;38056466;38056882;38057776;38059294;38063335;38067619;38071497;38074443;38079398;38083820;38085652;38088674;38092215;38099021;38107694;38108467;38129662	-	4262	Rev1	protein-coding	-1.30548	6.36135	-26.0853	1.18e-14	2.48e-13	23.6647
11303	chr4	53030789;53035337;53036262;53036873;53038157;53038619;53040719;53041539;53042314;53042664;53044115;53045775;53046030;53048956;53050289;53050935;53059257;53060333;53061487;53062390;53065901;53067031;53068687;53069792;53070076;53071823;53072898;53074220;53075131;53075447;53076891;53077943;53079571;53080766;53081922;53083717;53084384;53085096;53085993;53089799;53090254;53092729;53095585;53107006;531…	53034083;53035580;53036354;53036976;53038291;53038760;53040825;53041601;53042434;53042793;53044238;53045919;53046145;53049133;53050458;53051009;53059362;53060365;53061581;53062579;53065999;53067155;53068835;53069905;53070124;53072025;53072970;53074440;53075268;53075589;53077022;53078114;53079684;53080970;53082143;53083939;53084560;53085301;53086190;53089915;53090393;53092969;53095677;53107182;531…	-	10260	Abca1	protein-coding	-1.02046	7.38239	-26.1955	1.1e-14	2.35e-13	23.6485
18597	chrX	160122219;160124519;160126194;160127291;160127573;160128465;160129410;160130109;160132069;160133173;160138256	160123947;160124627;160126261;160127362;160127728;160128557;160129501;160130235;160132242;160133232;160138336	-	2761	Pdha1	protein-coding	0.987533	7.8774	26.2328	1.08e-14	2.32e-13	23.6428
68142	chr2	119373042;119377347;119379563;119379966;119381910;119382864;119383350;119392853;119402330;119406816;119412402;119418321;119423605;119425259;119425705;119426589;119426900;119428477;119430988;119431928;119433191;119434149;119439375;119441613;119442383;119444447;119445461;119446856;119448205;119450003;119451330;119454056;119456385;119456572;119458081;119477379	119374581;119377562;119379722;119380121;119381998;119382966;119383508;119392925;119402424;119406943;119412627;119418461;119423776;119425352;119425772;119426722;119427067;119428562;119431105;119432012;119433333;119434208;119439470;119441693;119442592;119444514;119445656;119447059;119448258;119450217;119451450;119454217;119456452;119456741;119458266;119477629	-	6296	Ino80	protein-coding	1.05521	6.93883	26.1277	1.15e-14	2.43e-13	23.6349
110596	chr13	97898595;97929411;97930778;97936675;97936823;97939460;97942453;97944516;97945649;97946803;97951569;97953709;97956526;97957707;97961300;97965408;97967087;97967288;97969281;97970315;97978031;97978430;97981372;97985311;97988141;97993902;97996812;98029377;98029876;98043800;98050946;98053791;98074999;98077173;98145552;98206073	97899816;97929705;97931263;97936722;97936861;97939560;97942584;97944698;97945740;97946981;97951645;97953963;97956643;97957829;97961547;97965548;97967208;97967432;97969329;97970370;97978163;97978553;97981414;97985422;97988345;97994182;97996933;98029437;98029931;98043866;98051126;98053974;98075292;98077320;98145595;98206165	-	6259	Arhgef28	protein-coding	-1.69286	4.46789	-25.6535	1.54e-14	3.07e-13	23.621
226250	chr19	56912354;56914125;56914370;56915672;56916062;56916324;56917126;56917982;56920377;56922935;56923533;56925067;56928249;56930056;56937235;56943445;56944705;56950138;56963830;56964797;57002250;57008151	56913408;56914253;56914563;56915827;56916242;56916572;56917237;56918127;56920588;56923039;56923617;56925156;56928428;56930261;56937325;56943539;56944779;56950266;56963872;56964859;57002303;57008575	-	4075	Afap1l2	protein-coding	-1.82601	4.75403	-25.688	1.51e-14	3.02e-13	23.6156
74437	chrX	62283499;62287142;62289351;62290162;62290365	62283553;62287235;62289439;62290234;62292078	+	2025	4933402E13Rik	protein-coding	-1.81007	4.38327	-25.6193	1.57e-14	3.12e-13	23.6115
21420	chr2	172549593;172550991;172551407;172551996;172553416;172554041;172556065;172557091	172549882;172551221;172551889;172552047;172553632;172554159;172556209;172558622	+	3069	Tfap2c	protein-coding	-1.1419	5.58942	-25.8715	1.35e-14	2.77e-13	23.6096
11689	chr6	116410071;116412460;116413122;116413442;116413738;116414523;116415374;116420241;116423143;116424137;116427143;116448270;116454117;116460875	116410898;116412630;116413222;116413563;116413916;116414609;116415577;116420387;116423315;116424243;116427265;116448351;116454315;116461178	-	2827	Alox5	protein-coding	-3.2898	2.81965	-25.7038	1.49e-14	2.99e-13	23.6082
80288	chr9	44499136;44499448;44500745;44501802;44505053;44505416;44505584;44508153;44508696	44499273;44499549;44501130;44501921;44505263;44505500;44507870;44508434;44510423	+	5339	Bcl9l	protein-coding	-2.21784	5.48804	-25.791	1.41e-14	2.89e-13	23.6072
16432	chr14	73362231;73364542;73365752;73366321;73368299;73385010	73363143;73364692;73365862;73366527;73368427;73385271	-	1773	Itm2b	protein-coding	-1.07575	6.52055	-25.9976	1.25e-14	2.61e-13	23.5892
27998	chr7	25659153;25663137;25664327;25665421;25666253;25667700	25659383;25663250;25664448;25665561;25666342;25668032	+	1031	Exosc5	protein-coding	1.02691	6.30258	25.9618	1.27e-14	2.66e-13	23.5838
76108	chr14	120478461;120503601	120479040;120507194	+	4174	Rap2a	protein-coding	-1.66441	5.36791	-25.7327	1.46e-14	2.96e-13	23.5636
26921	chr1	39900913;39901509;39962178;39973927;39976707;39980560;39983139;39983883;39985182;39986625;39988970;39990089;39997021;39999888;40000624;40001430;40003757;40004807;40006671;40007433;40008331;40009688;40010557;40011650;40014106;40014527;40017110;40019544;40021084;40022705;40023360;40024310;40024629	39901286;39901574;39962234;39974052;39976817;39980650;39983269;39983937;39985260;39986800;39989042;39990299;39997182;39999974;40000749;40001591;40003987;40004913;40006822;40007530;40008339;40009863;40010677;40011841;40014223;40014697;40017253;40019678;40021184;40022854;40023519;40024449;40026310	+	5974	Map4k4	protein-coding	-0.834449	8.15325	-26.1235	1.15e-14	2.43e-13	23.559
100732	chr5	30814756;30861807;30862498;30863204;30864574;30864815;30865128	30814898;30861934;30862643;30863405;30864728;30864967;30866106	+	1906	Mapre3	protein-coding	-2.88379	2.69335	-25.5983	1.59e-14	3.15e-13	23.5535
242642	chr4	116819907	116821508	-	1602	Hpdl	protein-coding	2.98413	2.51668	25.6636	1.53e-14	3.06e-13	23.5534
56454	chr19	40550257;40553524;40554591;40557419;40557651;40562902;40564836;40566572;40568322;40569033;40570468;40573771;40574211;40577578;40577772;40579862;40585490;40586127;40588310	40551329;40553619;40554777;40557540;40557846;40563039;40565056;40566665;40568395;40569177;40570592;40573861;40574369;40577682;40577921;40580076;40585605;40586192;40588463	-	3527	Aldh18a1	protein-coding	1.24106	5.3666	25.73	1.47e-14	2.96e-13	23.546
18424	chr14	48658171;48661299;48662444	48659326;48661450;48662872	-	1737	Otx2	protein-coding	2.17888	3.72916	25.4195	1.78e-14	3.48e-13	23.5419
20737	chr7	127133464;127133702;127137747	127133638;127137367;127137817	-	3912	Spn	protein-coding	2.50029	3.79109	25.4083	1.79e-14	3.49e-13	23.5366
64009	chr10	5020192;5030376;5031766;5032917;5034933;5037216;5040764;5041461;5043611;5047531;5048724;5052275;5052656;5056377;5057780;5061389;5068807;5072037;5075789;5083824;5086668;5097485;5099360;5102330;5103636;5104814;5107813;5108522;5110831;5111375;5113950;5116967;5122981;5123655;5124814;5126660;5127194;5128380;5130010;5131908;5140812;5143150;5146253;5153099;5153863;5154464;5157621;5161452;5162334;5168687…	5022247;5030434;5031858;5033129;5035061;5037416;5040975;5041584;5043753;5047858;5048915;5052412;5052838;5056527;5057967;5061551;5069063;5072203;5075947;5083979;5086793;5097679;5099594;5102424;5103783;5104968;5107959;5108704;5111035;5111508;5114120;5117122;5123136;5123831;5124963;5126842;5127326;5128576;5130141;5132081;5141012;5143269;5146354;5153308;5154018;5154595;5157759;5161561;5162465;5168878…	-	18115	Syne1	protein-coding	-1.21766	4.99447	-25.6159	1.57e-14	3.13e-13	23.5224
226075	chr19	28262448;28263862;28283652;28298778;28317254;28354206;28357791;28530873;28540201;28665753;28679596	28263115;28264044;28283827;28298946;28317413;28354316;28357952;28531986;28540408;28666236;28680077	-	3917	Glis3	protein-coding	-1.82435	3.87937	-25.4046	1.79e-14	3.49e-13	23.5204
56526	chrX	36911272;36913443;36920369;36922840;36926782;36930099;36934384;36942055;36946568;36966596;36975063;36989379	36913254;36916545;36920413;36923030;36926914;36930267;36934480;36942216;36946754;36966791;36975177;36989695	-	6698	2017-09-06	protein-coding	1.81123	3.72709	25.3703	1.83e-14	3.56e-13	23.5059
13121	chr5	4080674;4086460;4087778;4091845;4092388;4099124;4100145;4101178;4102928;4104134	4083303;4086628;4087873;4092040;4092507;4099298;4100271;4101354;4103026;4104697	-	4353	Cyp51	protein-coding	1.18356	5.81156	25.7505	1.45e-14	2.93e-13	23.5044
56422	chr10	21295979;21299178;21304530;21307585;21309099;21336967;21341714;21342399;21345077;21347262;21349312;21351927;21352542;21354639;21358313;21358732;21364675;21367642;21368289	21296176;21299243;21304643;21307779;21311198;21337075;21341979;21342564;21345194;21347408;21349386;21352044;21352610;21354743;21358403;21358840;21364775;21367786;21368889	+	4893	Hbs1l	protein-coding	1.30309	6.1499	25.7814	1.42e-14	2.9e-13	23.4897
75746	chrX	139821635;139823966;139834410;139835936;139836485;139837854;139840698;139849649;139852013;139854410;139854859;139857748;139858799;139864495;139871070;139871272	139823413;139824644;139834582;139835987;139836553;139837982;139840787;139849749;139852132;139854538;139854991;139857895;139859016;139864627;139871142;139871654	-	4409	Morc4	protein-coding	-1.62207	5.15418	-25.5763	1.61e-14	3.19e-13	23.4887
101739	chr4	83455680;83458075;83459844;83460154;83460459;83461186;83463595;83464925;83466708;83468583;83473040;83474278;83476282;83482457;83485717;83486275	83457079;83458186;83460057;83460255;83460529;83461241;83463713;83465150;83466783;83468676;83473102;83474382;83476420;83482533;83485928;83486390	-	3182	Psip1	protein-coding	1.01808	7.17996	25.898	1.32e-14	2.75e-13	23.4713
12476	chr7	141467362;141468419;141468789;141469255;141469466;141469937;141470121;141470310;141470551	141467584;141468546;141468896;141469345;141469657;141470011;141470225;141470468;141471481	+	2012	Cd151	protein-coding	-1.06519	6.49042	-25.8046	1.4e-14	2.88e-13	23.4687
56753	chr6	67534059	67535822	-	1764	Tacstd2	protein-coding	-3.18376	2.50923	-25.572	1.62e-14	3.19e-13	23.4649
20656	chr17	13007839;13008184;13010520;13013433;13015026	13008068;13008386;13010636;13013612;13018119	+	3824	Sod2	protein-coding	1.16993	7.25096	25.884	1.33e-14	2.75e-13	23.4591
13030	chr14	63122462;63133316;63133965;63135608;63136407;63138033;63138351;63138999;63141734;63142232	63122565;63133466;63134050;63135722;63136525;63138118;63138494;63139115;63141862;63145923	+	4743	Ctsb	protein-coding	-0.946585	7.38402	-25.8863	1.33e-14	2.75e-13	23.4512
104009	chr1	155778155;155781275;155782525;155783403;155786794;155789298;155790981;155792194;155794546;155795351;155803697;155812526	155779938;155781454;155782672;155783525;155786923;155789432;155791126;155792284;155794648;155795396;155803797;155812899	-	3361	Qsox1	protein-coding	-1.49401	4.58599	-25.4038	1.8e-14	3.49e-13	23.4436
71345	chr7	141101219;141102019;141102258;141102425;141103087;141103992;141104242;141104483;141104669;141106763;141107051;141107167;141107396;141107601;141107797;141108046;141108251;141108618;141108785;141108941;141110376;141110631;141111155;141117714	141101927;141102131;141102351;141102526;141103234;141104144;141104384;141104580;141104726;141106874;141107087;141107319;141107500;141107683;141107857;141108142;141108385;141108691;141108843;141108987;141110512;141110756;141111229;141117806	-	3012	Ano9	protein-coding	1.63095	4.49993	25.3848	1.82e-14	3.53e-13	23.4416
16765	chr4	134468320;134470103;134470667;134472804;134473332	134468429;134470175;134470839;134472995;134473843	+	1060	Stmn1	protein-coding	1.26676	5.43631	25.5698	1.62e-14	3.19e-13	23.4355
214253	chr1	133363572;133365576;133368750;133373135;133374527;133376906;133378449;133379317	133364018;133365835;133368872;133373277;133374610;133377051;133378522;133380318	+	2279	Etnk2	protein-coding	-1.30484	4.75208	-25.4214	1.78e-14	3.48e-13	23.4303
353172	chr6	55038001;55046414;55048067;55050320;55052176;55053129;55055750;55060909;55063091;55065448;55068061;55069341;55073339;55075382;55076955;55077583;55079220	55038233;55046515;55048169;55050461;55052264;55053205;55055895;55061058;55063253;55065612;55068168;55069486;55073424;55075491;55077048;55077773;55079504	+	2390	Gars	protein-coding	0.980742	7.87673	25.8941	1.33e-14	2.75e-13	23.4273
27389	chr14	21733395;21734896;21740104;21742662;21743435;21744748;21746310;21747421;21748446	21733851;21735116;21740277;21742879;21743529;21744942;21746517;21747638;21748622	-	1963	Dusp13	protein-coding	-2.97268	3.28418	-25.2109	2.03e-14	3.83e-13	23.4018
276829	chr11	72390114;72399874;72400329;72401348;72402425;72403011;72403917;72411244	72391413;72400025;72400446;72401527;72402500;72403250;72404004;72411713	-	2624	Smtnl2	protein-coding	1.52501	6.16114	25.6372	1.55e-14	3.09e-13	23.4014
110616	chr12	101918901;101926484;101932924;101934248;101937337;101942117;101945400;101945834;101948004;101948275;101958134	101923204;101926581;101933064;101934414;101937469;101942204;101945466;101945919;101948048;101948439;101958243	-	5404	Atxn3	protein-coding	1.20474	5.9639	25.606	1.58e-14	3.14e-13	23.395
68861	chr9	94517864;94524392;94537219	94520646;94524695;94538081	-	3950	1190002N15Rik	protein-coding	1.41251	4.59371	25.3333	1.88e-14	3.61e-13	23.3924
18218	chr7	142079487;142083268;142083592;142084353;142088364;142089944;142094923	142083030;142083391;142083751;142084519;142088502;142090266;142095284	-	4819	Dusp8	protein-coding	-3.11739	2.48924	-25.4371	1.76e-14	3.45e-13	23.3902
17295	chr6	17463957;17487797;17491227;17513350;17526313;17527076;17531423;17533911;17534122;17534942;17535838;17540438;17546950;17548686;17549032;17553239;17555547;17558709;17562158;17563554;17571372;17571613	17464248;17487845;17492437;17513541;17526447;17527249;17531583;17534013;17534258;17535103;17535937;17540656;17547096;17548839;17549172;17553469;17555627;17558890;17562267;17563719;17571508;17573980	+	6652	Met	protein-coding	-1.79072	3.99948	-25.2103	2.03e-14	3.83e-13	23.3878
16399	chr11	102453297;102455564;102455899;102456230;102456965;102457185;102457460;102457772;102458113;102458342;102459873;102460138;102460516;102460749;102460990;102461129;102461318;102461637;102464940;102465305;102465497;102465711;102465890;102466257;102466477;102467054;102467327;102467593;102467780;102469525	102453517;102455680;102456000;102456346;102457084;102457328;102457559;102457852;102458192;102458434;102460020;102460205;102460641;102460900;102461045;102461233;102461363;102461819;102465151;102465357;102465550;102465754;102465937;102466385;102466522;102467103;102467489;102467690;102467901;102469883	-	3437	Itga2b	protein-coding	-1.88129	4.00902	-25.2046	2.03e-14	3.84e-13	23.385
22004	chr4	43514712;43518230;43518402;43518644;43519227;43519389;43519611;43522675;43523241	43516003;43518299;43518464;43518719;43519297;43519506;43519744;43522800;43523388	-	2098	Tpm2	protein-coding	-1.20895	5.4043	-25.4569	1.74e-14	3.42e-13	23.3686
58180	chr16	17233587;17254968;17257335	17233730;17255066;17263430	+	6339	Hic2	protein-coding	-0.897398	7.74876	-25.7863	1.42e-14	2.9e-13	23.3653
56456	chr3	32708546;32711868;32712101;32714517;32715416;32718031;32718368;32718567;32719901;32720186;32720435;32722620;32725247;32726522	32708880;32711944;32712275;32714617;32715513;32718125;32718474;32718656;32719962;32720300;32720515;32722715;32725333;32726971	+	1969	Actl6a	protein-coding	0.95306	7.48654	25.758	1.44e-14	2.92e-13	23.3617
69826	chr19	10962293;10962935;10964036;10964662;10965758;10967068;10968122;10968592;10974619	10962402;10963073;10964129;10964772;10965889;10967124;10968241;10968787;10974670	-	1011	Ms4a10	protein-coding	-2.90619	2.67604	-25.2757	1.94e-14	3.7e-13	23.3585
71887	chr3	104781056;104782601;104783127;104783654;104784043;104784634;104784956;104785186;104785398;104785702	104781409;104782721;104783414;104783766;104784127;104784752;104785019;104785293;104785549;104786018	+	1721	Ppm1j	protein-coding	1.87951	3.76394	25.112	2.15e-14	4.02e-13	23.3413
213522	chr6	125362651;125363042;125364584;125370381;125370582;125372058;125372478;125372813;125373107;125374529;125374974;125375243;125375724;125377382;125378702;125379755;125380350	125362867;125363719;125364735;125370496;125370714;125372177;125372615;125372962;125373217;125374678;125375024;125375338;125375888;125377537;125378910;125379976;125380504	-	3019	Plekhg6	protein-coding	-1.9845	3.51007	-25.0838	2.19e-14	4.07e-13	23.3374
30954	chr12	112644828;112646838;112647825;112648980	112645084;112647032;112647981;112649152	+	782	Siva1	protein-coding	-0.982161	6.95633	-25.6408	1.55e-14	3.09e-13	23.3232
353156	chr2	26581056;26583864;26585585;26586630;26589045;26589330;26590380;26590657;26590899;26591664;26592118;26592418	26581241;26584048;26585675;26586681;26589169;26589446;26590495;26590752;26591063;26591728;26592280;26592682	+	1626	Egfl7	protein-coding	1.33503	5.03603	25.3008	1.91e-14	3.65e-13	23.3146
72057	chr17	14944994;14946199;14946655;14950560;14952620;14954015;14954792;14955033;14955984;14956734;14959419;14961111	14945184;14946387;14946763;14950715;14952773;14954124;14954941;14955166;14956067;14956864;14959525;14961260	-	1665	Phf10	protein-coding	1.20345	5.35832	25.3452	1.86e-14	3.58e-13	23.2988
107747	chr6	90550848;90557202;90559242;90559826;90562619;90563365;90564346;90566639;90569473;90569793;90570784;90571867;90576628;90577785;90580476;90583173;90589337;90590738;90591801;90594483;90596868;90598186;90598887	90550970;90557351;90559476;90559991;90562720;90563454;90564483;90566764;90569564;90569940;90570903;90571994;90576778;90577855;90580581;90583260;90589430;90590837;90591899;90594648;90596973;90598385;90599171	+	3084	Aldh1l1	protein-coding	-1.1995	5.41804	-25.3076	1.91e-14	3.65e-13	23.2701
239510	chr15	66577572;66580069;66594807;66595115;66597359;66597677;66604027;66604780;66609526;66613021;66615220;66615638;66622761;66623992;66628925;66629800;66630867;66632706;66636684;66639913;66641798	66577847;66580188;66594978;66595199;66597447;66597754;66604240;66604905;66609608;66613270;66615408;66615847;66622817;66624099;66629089;66629981;66630966;66632901;66637032;66640075;66645255	+	6670	Phf20l1	protein-coding	-1.54494	6.08801	-25.3649	1.84e-14	3.56e-13	23.2372
14958	chr15	79028212	79030504	+	2293	H1f0	protein-coding	1.28943	5.22799	25.2136	2.02e-14	3.83e-13	23.2322
11501	chr7	139978941;139979960;139982782;139983308;139983835;139984729;139985337;139985829;139986303;139986733;139986893;139987179;139987560;139987819;139988214;139988463;139988811;139988962;139989244;139989897;139990051;139990272;139991346;139992432	139979527;139980034;139982832;139983373;139983994;139984843;139985430;139985906;139986468;139986808;139987082;139987268;139987737;139987967;139988295;139988629;139988879;139989024;139989427;139989973;139990129;139990348;139991449;139992488	-	3034	Adam8	protein-coding	-1.42916	4.32094	-25.0284	2.27e-14	4.2e-13	23.2304
214162	chr9	44803355;44809064;44809715;44810636;44810902;44812987;44814575;44816595;44817706;44818283;44822687;44823228;44824325;44824521;44825390;44826822;44828784;44829078;44830050;44830395;44831224;44832861;44833907;44835802;44836144;44836551;44840971;44841563;44842310;44842533;44843358;44845389;44846853;44847404;44852937;44880849	44808177;44809193;44809798;44810739;44811080;44813061;44814745;44816659;44817786;44822519;44822869;44823388;44824403;44824638;44825548;44826959;44828890;44829271;44830123;44830505;44831397;44833045;44834020;44835922;44836239;44836697;44841084;44841694;44842383;44842916;44843422;44845623;44847030;44850054;44853006;44881274	-	16439	Kmt2a	protein-coding	-1.38415	6.36899	-25.4029	1.8e-14	3.49e-13	23.2284
56390	chr19	5730306;5731241;5731444;5731676	5730712;5731325;5731595;5731721	-	690	Sssca1	protein-coding	1.20018	5.05037	25.1621	2.09e-14	3.92e-13	23.2194
170676	chr6	4747306;4754124	4747578;4760517	+	6667	Peg10	protein-coding	-0.939973	10.5303	-25.7557	1.44e-14	2.92e-13	23.2139
19231	chr1	86526736;86529173;86529456;86529731;86529965	86526950;86529244;86529552;86529804;86530698	+	1192	Ptma	protein-coding	0.809144	10.0938	25.7202	1.48e-14	2.97e-13	23.2079
208177	chr16	45746230;45748727;45751346;45757099;45758117;45762910;45770672;45772135;45774163;45774944;45777713;45780256;45781302;45788989;45801492;45802696;45808126;45824759;45844208	45747931;45748812;45751565;45757245;45758207;45763114;45770771;45772275;45774345;45775087;45777802;45780366;45781457;45789117;45801629;45802839;45808509;45826095;45844378	-	5679	Phldb2	protein-coding	-1.66595	4.45217	-24.9986	2.31e-14	4.26e-13	23.2027
69863	chr4	83220301;83230408;83232711;83237242;83240068;83241646;83242139;83243904;83244048;83245030;83246273;83247613;83252986;83256045;83260882;83261826;83263694;83271117;83297928;83324071	83227224;83230524;83232828;83237350;83240194;83241737;83242300;83243963;83244115;83245138;83246338;83247718;83253050;83256112;83260958;83261957;83263801;83271218;83297962;83324189	-	8764	Ttc39b	protein-coding	1.06697	6.25126	25.3483	1.86e-14	3.58e-13	23.1948
12913	chr4	43562634;43563050;43563281;43563469;43565261;43565467;43566120;43566294;43566469	43562959;43563206;43563351;43563558;43565367;43565535;43566204;43566378;43567060	+	1582	Creb3	protein-coding	-1.39971	5.16362	-25.1231	2.14e-14	4e-13	23.1882
109079	chr2	4881564;4884332;4889183;4891587;4893185;4896689;4899464;4905472;4906581	4881860;4884605;4889286;4891694;4893339;4896779;4899563;4905684;4910557	+	5319	Sephs1	protein-coding	1.06466	6.03268	25.303	1.91e-14	3.65e-13	23.1882
66902	chr4	89137370;89148189;89152009;89156446;89171128;89172145;89176803;89179468	89137524;89148275;89152067;89156613;89171230;89172384;89176925;89181090	+	2558	Mtap	protein-coding	1.17542	6.14532	25.3171	1.89e-14	3.64e-13	23.1876
19076	chr1	33453811;33464053;33480458;33484682;33512016;33514145;33533296;33628395;33630338;33662246;33663777;33667045;33668858;33669624	33454304;33464121;33480540;33484808;33512201;33514217;33533363;33628532;33630433;33662366;33663856;33667148;33669020;33669758	-	1937	Prim2	protein-coding	1.39531	5.51576	25.1936	2.05e-14	3.86e-13	23.1856
328274	chr13	67405712;67413108;67413834;67421342	67408742;67413203;67413960;67421418	-	3331	Zfp459	protein-coding	2.35882	4.36339	24.9209	2.43e-14	4.46e-13	23.1804
71602	chr9	70207350;70286912;70297267;70301693;70316592;70320069;70322392;70324833;70327144;70335115;70337729;70338717;70341281;70341982;70343044;70346687;70353260;70359285;70362223;70367616;70368669;70370357;70376504;70378211;70378721;70383804;70395776;70398722	70207703;70287055;70297356;70301787;70316679;70320158;70322523;70324967;70327276;70335311;70337809;70338803;70341367;70342149;70343129;70346768;70353366;70359383;70362367;70367730;70368838;70370502;70376650;70378368;70378810;70384005;70395945;70400067	+	4944	Myo1e	protein-coding	-0.923556	7.13505	-25.4182	1.78e-14	3.48e-13	23.1653
218215	chr13	47122720;47194003;47207360;47220494;47228940;47237403;47239717;47242864;47244361	47122873;47194120;47207550;47220598;47229000;47237601;47239861;47242953;47247991	+	4694	Rnf144b	protein-coding	-2.42782	3.62397	-24.797	2.63e-14	4.75e-13	23.156
67809	chr2	119136998;119138347;119139039;119139352;119140044;119140260;119142628;119146338;119147309;119153376;119153890;119156358;119156907	119137752;119138427;119139092;119139450;119140121;119140335;119142688;119146440;119147594;119153519;119154082;119156551;119157034	-	2252	Rmdn3	protein-coding	1.24003	5.5029	25.1494	2.1e-14	3.94e-13	23.1542
57295	chr4	152297214;152298685;152299137;152299671;152300537;152303022	152297568;152298773;152299245;152299840;152300754;152307126	+	5046	Icmt	protein-coding	-0.981347	6.28986	-25.2732	1.95e-14	3.7e-13	23.1427
242109	chr3	98382481;98425223;98427162	98382578;98425500;98431949	+	5164	Zfp697	protein-coding	-2.6116	3.10714	-24.7981	2.63e-14	4.75e-13	23.1425
100039269	chr7	41153870;41155479;41157464	41153876;41156240;41159271	+	2577	Gm2128	protein-coding	-3.75561	1.82841	-25.5921	1.6e-14	3.16e-13	23.1414
11650	chr1	87086690;87087429;87087658;87087933;87088174;87088356;87088706;87088950;87089273;87089495;87089700	87087340;87087545;87087849;87088067;87088246;87088490;87088878;87089124;87089388;87089611;87089928	-	2113	Alppl2	protein-coding	2.52639	2.99194	24.8014	2.62e-14	4.75e-13	23.1409
240892	chr1	166098148;166107973;166110052;166112031;166127070;166127792	166101386;166108190;166110283;166112125;166127203;166127898	-	4025	Dusp27	protein-coding	1.09804	5.9292	25.191	2.05e-14	3.86e-13	23.1274
16210	chr18	12972252;12974713;12975979;12976469;12982090;12984239;12985219;12986324;12988295;12989745;12990493	12972372;12974841;12976031;12976531;12982175;12984364;12985316;12986397;12988385;12989879;12992948	+	3432	Impact	protein-coding	-0.99077	7.11532	-25.3561	1.85e-14	3.57e-13	23.1269
381224	chr19	41575867;41581778	41575959;41586536	+	4852	Gm340	protein-coding	-1.16625	6.33669	-25.1896	2.05e-14	3.86e-13	23.0873
111975	chr7	142659693;142665522;142666256;142667186	142661029;142665579;142666467;142670356	+	4778	Igf2os	ncRNA	-1.84096	3.77957	-24.7031	2.79e-14	4.99e-13	23.0796
22773	chrX	58030628;58033362;58034370	58032237;58033525;58036630	+	4035	Zic3	protein-coding	1.76069	5.01494	24.9106	2.45e-14	4.49e-13	23.076
75805	chr13	104023439;104035587;104036854;104037298;104046189;104050495;104052504;104058741;104059467;104061745;104069195;104072763;104109416	104025080;104035723;104036982;104037484;104046390;104050861;104052639;104058901;104059569;104061852;104069343;104073022;104109614	-	3780	Nln	protein-coding	1.1001	6.2322	25.1565	2.1e-14	3.93e-13	23.0721
18641	chr10	77986947;77988675;77988865;77989566;77989890;77990142;77990672;77991354;77992016;77992392;77993382;77994136;77995244;77996320;77997524;77999826;78000135;78000676;78001311;78002010;78005441;78009599	77988357;77988780;77988964;77989677;77989951;77990306;77990824;77991441;77992086;77992538;77993445;77994200;77995369;77996412;77997619;77999934;78000179;78000841;78001500;78002087;78005514;78009796	-	3719	Pfkl	protein-coding	1.21234	8.46863	25.3591	1.85e-14	3.57e-13	23.0508
20674	chr3	34650005	34652461	+	2457	Sox2	protein-coding	1.11618	7.88989	25.3107	1.9e-14	3.65e-13	23.0493
100121	chr4	45972423;45987462;45989078;45990050;45992197;45994307;46005117;46007455;46010790;46013066;46016869;46018530;46020805;46023395;46025657;46029647;46034296	45972436;45987674;45989219;45990230;45992270;45994524;46005700;46007641;46010901;46013268;46017003;46018616;46020939;46023505;46026159;46029807;46034761	+	3526	Tdrd7	protein-coding	-1.85803	3.47914	-24.6286	2.93e-14	5.19e-13	23.047
19878	chr12	16894978;16926939;16928934;16940403;16942694;16948458;16950572;16952496;16953261;16954907;16955670;16957226;16957461;16958119;16958340;16958628;16959402;16961616;16965011;16965468;16966624;16968211;16968580;16971049;16971225;16972661;16972981;16974842;16975470;16976034;16977542;16977889;16984638	16895330;16927020;16929034;16940540;16942954;16948602;16950710;16952587;16953420;16954967;16955681;16957305;16957509;16958254;16958431;16958874;16959508;16961775;16965171;16965652;16966693;16968314;16968766;16971142;16971319;16972840;16973149;16974912;16975558;16976112;16977803;16978102;16988274	+	8012	Rock2	protein-coding	-1.11866	7.72392	-25.2887	1.93e-14	3.68e-13	23.0448
12696	chr10	80167841;80169808;80170016;80170202;80170425;80170694;80170982	80167916;80169916;80170122;80170340;80170506;80170764;80171653	+	1256	Cirbp	protein-coding	-1.26469	5.06331	-24.8886	2.48e-14	4.54e-13	23.0438
67204	chr2	154871410;154873549;154876616;154877671;154878470;154884311;154887704;154888183;154892690	154872900;154873634;154876672;154877819;154878564;154884446;154887807;154888360;154892906	-	2513	Eif2s2	protein-coding	0.900675	8.81975	25.3686	1.83e-14	3.56e-13	23.0383
21976	chr16	16870891;16877832;16878957;16879319;16880604;16882501;16883407;16884239;16885835;16886605;16886880;16887577;16887832;16889483;16890112;16890582;16891355;16892415	16871055;16878016;16879088;16879425;16880678;16882697;16883563;16884352;16885925;16886759;16886985;16887723;16888005;16889611;16890261;16890682;16891556;16892986	+	2959	Top3b	protein-coding	-0.99471	7.48629	-25.2493	1.98e-14	3.75e-13	23.0325
21951	chr8	34829179;34834438;34838384;34838888;34839968;34841753;34842915;34847281;34848582;34849153;34851098;34851614;34853224;34855928;34857454;34861515;34867281;34867694;34869472;34873028;34873603;34875214;34889676;34890504;34918379;34940696;34965014	34831721;34834594;34838570;34838993;34840042;34841850;34843035;34847363;34848819;34849341;34851207;34851833;34853389;34856073;34857533;34861686;34867359;34867785;34869593;34873214;34873669;34875308;34889751;34890540;34918474;34940920;34965690	-	6444	Tnks	protein-coding	-0.9336	6.90742	-25.1879	2.05e-14	3.86e-13	23.0314
67213	chr9	114731203;114737183;114740059;114746439	114731373;114737359;114740157;114749343	+	3352	Cmtm6	protein-coding	-1.11797	6.45118	-25.1175	2.15e-14	4.01e-13	23.0278
52377	chr7	45082914;45083566;45084904;45086665;45088498;45091441;45092096	45083363;45083765;45084964;45086837;45088700;45091688;45092213	-	1453	Rcn3	protein-coding	2.16258	4.35269	24.6751	2.84e-14	5.06e-13	23.0146
58996	chr11	97450160;97451392;97453865;97454214;97454446;97456455;97463384;97464795;97465059;97466010;97466432;97470368;97475015;97475324;97476048;97490072;97491134;97493051;97500109	97450365;97452544;97454020;97454325;97454503;97456598;97463701;97464856;97465189;97466131;97466587;97470446;97475088;97475413;97476173;97490113;97491230;97493082;97502400	+	5450	Arhgap23	protein-coding	-1.6741	6.44099	-25.0711	2.21e-14	4.1e-13	23.0124
17076	chr2	60293760;60299047;60300955;60303578;60306330;60308139;60311609;60314157;60316089;60318308;60321698;60323819;60327787;60328390;60329976;60330726;60331077;60332319;60332925;60334450;60338295;60340153;60348353;60349858;60352056;60352354;60352922;60354405;60355369;60357277;60358468;60365011;60368759;60375858;60383138	60293938;60299214;60301077;60303727;60306498;60308365;60311803;60314273;60316256;60318473;60321924;60323948;60327947;60328495;60330115;60330808;60331144;60332494;60332960;60334564;60338363;60340234;60348495;60350057;60352225;60352442;60353032;60354562;60355560;60357417;60358578;60365175;60368929;60376229;60383231	-	5172	Ly75	protein-coding	1.23256	6.13422	25.04	2.25e-14	4.18e-13	23.0085
240675	chr19	56874416;56881125;56885023;56886878;56893766;56897874;56901528;56902236;56903467;56905479;56906390;56908832;56909690;56910615	56874578;56881186;56885097;56887011;56893875;56898065;56901661;56902368;56903522;56905586;56906962;56909383;56909815;56912078	+	3882	Vwa2	protein-coding	-3.40682	2.89804	-24.6782	2.84e-14	5.05e-13	23.0042
12715	chr7	19411094;19414119;19414897;19415401;19416719;19419439;19420107;19421208	19411146;19414330;19415051;19415533;19416890;19419562;19420296;19421583	+	1415	Ckm	protein-coding	-3.66572	2.24561	-25.0168	2.29e-14	4.22e-13	23.0002
67808	chr4	154157485;154159269;154160085;154160355	154158565;154159422;154160261;154160684	-	1742	Tprgl	protein-coding	1.10116	5.76201	24.9655	2.36e-14	4.35e-13	22.9988
246277	chr15	102176998;102178527;102178781;102178961;102179521;102179829;102179971;102185998;102186394;102187054;102187566;102188007;102188182;102188543;102188887	102177786;102178616;102178832;102179160;102179602;102179893;102180087;102186052;102186473;102187169;102187672;102188097;102188308;102188679;102189043	-	2265	Csad	protein-coding	1.44228	4.87701	24.7671	2.68e-14	4.84e-13	22.9896
18131	chr17	32120893;32124282;32132202;32133388;32135385;32137816;32139131;32139645;32141217;32143244;32144168;32144367;32144702;32146407;32146981;32147262;32147765;32149975;32150603;32151286;32151516;32153525;32153753;32154314;32154738;32155958;32156252;32157891;32158211;32158419;32158840;32164163;32166676	32122860;32124379;32132349;32133692;32135547;32137900;32139353;32139799;32141549;32143809;32144286;32144624;32144834;32146591;32147128;32147463;32147990;32150130;32150716;32151437;32151708;32153635;32153986;32154427;32154851;32156143;32156407;32158124;32158333;32158757;32158982;32164244;32166852	-	7943	Notch3	protein-coding	-1.42457	6.81664	-25.0915	2.18e-14	4.06e-13	22.9841
75599	chr18	38196694;38202744;38209559	38199528;38203606;38209762	-	3902	Pcdh1	protein-coding	-2.38549	3.49491	-24.4938	3.19e-14	5.59e-13	22.9638
320678	chr6	125145241;125149589;125149741;125151385;125151795;125152614;125153042;125153410;125159062;125160533	125146029;125149649;125149836;125151525;125151803;125152771;125153162;125153502;125159192;125161782	+	2849	Iffo1	protein-coding	-1.57678	5.14675	-24.7399	2.73e-14	4.91e-13	22.9447
381678	chr5	137787802;137795491;137796572;137797898;137799508;137799986;137800974;137810016;137810813;137811575;137812002;137816893;137817458;137817798;137818964;137819442;137822154	137787945;137795545;137796816;137797973;137799601;137800143;137801096;137810132;137810933;137811650;137812100;137816976;137817524;137817892;137819024;137819576;137822621	+	2218	Zcwpw1	protein-coding	1.20178	5.47213	24.8147	2.6e-14	4.74e-13	22.9371
22422	chr15	85535437;85543669;85558903;85577508;85580251;85581380	85537868;85543940;85559129;85578070;85580729;85581821	-	4415	Wnt7b	protein-coding	-1.48423	5.16901	-24.7331	2.74e-14	4.92e-13	22.9343
320799	chr2	160770447;160779401;160832297;160872791	160771625;160782379;160832418;160872990	-	4480	Zhx3	protein-coding	-2.83709	2.7485	-24.5235	3.13e-14	5.5e-13	22.9202
80890	chr3	84161874;84167652;84171460;84172765;84177632;84178075;84190513;84192081;84193221;84208174;84210173;84220629	84165249;84167792;84171530;84172933;84177799;84178178;84191236;84192261;84193372;84208411;84210354;84220877	-	5755	Trim2	protein-coding	1.6955	4.15909	24.5186	3.14e-14	5.5e-13	22.9188
17974	chr1	43445751;43509621;43533552;43553861;43569148	43446027;43509783;43533793;43554582;43570518	+	2775	Nck2	protein-coding	-1.13768	5.30599	-24.7512	2.71e-14	4.88e-13	22.9181
22154	chr17	35833920;35836163;35836628;35837997	35836039;35836273;35836736;35838301	-	2645	Tubb5	protein-coding	1.02227	7.89532	25.0941	2.18e-14	4.06e-13	22.9063
67574	chrX	144317966;144319899;144322012;144324016;144336112;144337092;144338964;144339725;144340720;144342396;144342647;144344261;144345612;144346682;144347960;144349292;144350283;144351263;144351772;144352630;144353441;144353573;144355584;144356796;144363865;144367899;144369561;144373548	144318121;144320061;144322150;144325197;144336463;144337175;144339014;144339771;144340792;144342477;144342809;144344336;144345720;144346746;144348060;144349419;144350529;144351376;144351913;144352750;144353473;144353628;144355652;144356961;144364107;144367939;144369861;144374450	+	5407	Alg13	protein-coding	0.875995	7.34365	25.0342	2.26e-14	4.19e-13	22.8979
66234	chr8	64718145;64720342;64722464;64723588;64727624;64733508	64719181;64720496;64722590;64723736;64727908;64733578	-	1824	Msmo1	protein-coding	1.11832	6.04254	24.8473	2.55e-14	4.65e-13	22.8887
68802	chr10	63115795;63118421;63120029;63121902;63123271;63125669;63127628;63130983;63134933;63135708;63145836;63147877;63150023;63152795;63162222;63163513;63167233;63169255;63192387;63203718	63117026;63118554;63120194;63122109;63123397;63125748;63127777;63131204;63135071;63136295;63146208;63147993;63150046;63152936;63162293;63163624;63167284;63169430;63193283;63203952	-	5246	Mypn	protein-coding	2.3357	3.04937	24.3751	3.45e-14	5.97e-13	22.8806
68618	chrX	70385913;70387894;70388872	70386151;70388166;70389416	+	1057	1110012L19Rik	protein-coding	-1.29735	4.98743	-24.6164	2.95e-14	5.21e-13	22.8749
52430	chr4	108165437;108169715;108169861;108172089;108172880;108173795;108173987;108177073;108178371;108178907	108165661;108169782;108169948;108172175;108172972;108173851;108174174;108177123;108178418;108179308	+	1307	Echdc2	protein-coding	1.09025	6.28317	24.862	2.52e-14	4.61e-13	22.8723
239188	chr14	77156763;77268807;77312059;77380579;77441758;77506804;77508137;77577612;77578964;77582396;77592780;77611287;77615439;77632563;77637616;77664619;77668737;77699195;77707600;77720813	77157042;77268877;77312128;77380688;77441899;77506947;77508274;77577785;77579170;77582629;77592992;77611393;77615556;77632619;77637800;77664726;77668793;77699297;77707685;77721763	+	3555	Enox1	protein-coding	1.73989	4.34226	24.4761	3.23e-14	5.64e-13	22.8716
57810	chr9	35452076;35452661;35454303;35455323;35456448;35457397;35463875;35469865;35470985;35473434;35476877;35477951;35478584;35483098;35486750;35488975;35491845;35503160;35504057	35452177;35452933;35454449;35455466;35456735;35457666;35464228;35470154;35471159;35473565;35477080;35478132;35478689;35483220;35486971;35489240;35491924;35503419;35507652	+	7214	Cdon	protein-coding	-1.33546	5.56619	-24.7219	2.76e-14	4.95e-13	22.8705
216233	chr10	95411490;95414831;95415314;95416000;95416618	95413110;95415283;95415484;95416212;95416857	-	2698	Socs2	protein-coding	1.79245	3.8267	24.3749	3.45e-14	5.97e-13	22.8585
66694	chr13	30540312;30545034	30541341;30545316	-	1313	Uqcrfs1	protein-coding	1.27038	6.5353	24.8691	2.51e-14	4.6e-13	22.856
16664	chr11	100203162;100203956;100204108;100204424;100204633;100204948;100205621;100206913	100203409;100204020;100204328;100204549;100204794;100205104;100205703;100207510	-	1660	Krt14	protein-coding	-4.56304	2.21366	-24.998	2.32e-14	4.26e-13	22.8435
209200	chr16	35926515;35931373;35932276;35936377;35938694	35929368;35931590;35933799;35936627;35939027	-	5181	Dtx3l	protein-coding	3.09407	2.85086	24.3667	3.47e-14	6e-13	22.8299
12412	chr11	96789136;96800771;96801429;96802728;96806616;96808184	96789353;96800947;96801606;96802822;96806764;96808640	+	1274	Cbx1	protein-coding	1.0317	6.29948	24.8011	2.62e-14	4.75e-13	22.8292
11601	chr8	18691337;18694397;18698044;18699068;18703479;18705651;18710519;18714081;18740991	18692208;18694527;18698210;18699169;18703609;18705883;18710640;18714236;18741551	-	2475	Angpt2	protein-coding	-2.4141	2.92465	-24.3105	3.6e-14	6.16e-13	22.8262
21677	chr7	45215753;45217213;45218081;45219144;45220438;45220643;45223681;45225653;45228639;45231309;45232183;45232815	45215832;45217450;45218145;45219206;45220545;45220701;45223745;45225795;45228812;45231470;45232335;45233619	+	2115	Tead2	protein-coding	1.06952	6.67336	24.8125	2.6e-14	4.74e-13	22.8023
20401	chr15	78899786;78901146;78901399;78902555;78902854;78903059;78903553;78904270;78904464;78905030;78905771;78906256;78906423;78907214;78907961;78908353;78910008;78911930	78899961;78901188;78901503;78902631;78902965;78903135;78903697;78904338;78904554;78905175;78905882;78906337;78906503;78907330;78908058;78908512;78910093;78912052	+	1900	Sh3bp1	protein-coding	-1.41266	5.54663	-24.6094	2.97e-14	5.23e-13	22.8006
17681	chr1	14753346;14755230	14754325;14755966	-	1717	Msc	protein-coding	2.68236	2.74602	24.2898	3.65e-14	6.23e-13	22.7878
111175	chr1	72259172;72261952;72267407;72270277;72274886;72276166;72277287;72284093	72259433;72262063;72267517;72270373;72274967;72276331;72277420;72284314	-	1186	Pecr	protein-coding	1.58319	4.22901	24.3301	3.55e-14	6.12e-13	22.7833
30795	chr12	65062432;65063678;65065737;65066642;65069002;65069951;65073815	65062740;65063775;65065804;65066777;65069109;65070052;65073938	-	945	Fkbp3	protein-coding	1.2351	6.13622	24.6999	2.8e-14	5e-13	22.783
93706	chr18	37806410;37825021;37833265;37839903	37808977;37825079;37833353;37841873	+	4687	Pcdhgc3	protein-coding	-1.63466	4.1926	-24.2994	3.62e-14	6.2e-13	22.772
67588	chr10	128411616;128415119;128428591;128435313;128436468;128437308;128438083	128411825;128415301;128428703;128435584;128436603;128437411;128441441	+	4377	Rnf41	protein-coding	-0.989329	6.20669	-24.6809	2.83e-14	5.05e-13	22.7602
18803	chr2	160731310;160731718;160747775;160748034;160748282;160750963;160751143;160751436;160751633;160751784;160752088;160752295;160752454;160753185;160753442;160753643;160753824;160754285;160754563;160754761;160755741;160756541;160756870;160757214;160757972;160759454;160759682;160759983;160761080;160761305;160761560;160761739;160774528;160775350	160731344;160732033;160747927;160748127;160748329;160751047;160751226;160751470;160751705;160751885;160752206;160752380;160752574;160753353;160753564;160753744;160754011;160754485;160754682;160754941;160755818;160756644;160756966;160757283;160758129;160759550;160759906;160760131;160761194;160761466;160761648;160761923;160774587;160775760	+	4435	Plcg1	protein-coding	-0.917831	7.23034	-24.8114	2.61e-14	4.74e-13	22.7589
12544	chr16	18780447;18781896;18784806;18785073;18786769;18786930;18793178;18794762;18795095;18795825;18797349;18798676;18801801;18805382;18807280;18808732;18810389;18811305;18811515;18811804	18780573;18781962;18784882;18785191;18786852;18787068;18793339;18794860;18795226;18795944;18797399;18798737;18801849;18805437;18807423;18808869;18810481;18811364;18811709;18811972	-	2143	Cdc45	protein-coding	1.01674	6.3064	24.6737	2.85e-14	5.06e-13	22.7432
20411	chr19	40292040;40296532;40299463;40311669;40314364;40314617;40318022;40321793;40324747;40327450;40336986;40340045;40340685;40344356;40349899;40352277;40352518;40361042;40361429;40363202;40364994;40369690;40373476;40376645;40382521;40393388;40395679;40398542;40402258;40451314;40501449;40513371	40295116;40296644;40299521;40311863;40314489;40314731;40318068;40321960;40324832;40327622;40337035;40340146;40340750;40344439;40350013;40352406;40352565;40361104;40361503;40363265;40365166;40369719;40373617;40377016;40382633;40393516;40395768;40398610;40402310;40451398;40501585;40513812	-	6791	Sorbs1	protein-coding	-1.14678	5.67652	-24.555	3.07e-14	5.4e-13	22.7404
65964	chr2	72285637;72298188;72355558;72364628;72368401;72371727;72371871;72378634;72384131;72389470;72398290;72401989;72410149;72411930;72412071;72416541;72417955;72433368;72435231;72438202;72441232	72285855;72298380;72355645;72364729;72368466;72371755;72372008;72378720;72384205;72389839;72398425;72407502;72410193;72411960;72412210;72416603;72418047;72433484;72435305;72438352;72442610	+	9111	Zak	protein-coding	-1.18373	6.18667	-24.6368	2.91e-14	5.16e-13	22.737
103199	chr10	41188172;41220899;41226922;41228107;41230007;41232107;41233552;41240505;41251717;41253640;41254844;41256421;41258015;41263069;41263885;41265386;41267687;41270299;41272958;41277358;41285290;41285601;41302987	41188699;41220985;41227004;41228302;41230090;41232254;41233610;41240643;41251883;41253788;41254889;41256537;41258148;41263166;41264047;41265486;41267815;41270447;41273008;41277514;41285413;41285699;41303241	-	3263	Fig4	protein-coding	1.05335	6.699	24.7172	2.77e-14	4.96e-13	22.7363
100689	chr5	33213518;33215549;33216333;33216597;33217244;33217948	33214652;33215723;33216524;33216820;33217463;33218238	-	2237	Spon2	protein-coding	-2.8818	3.00228	-24.1739	3.93e-14	6.63e-13	22.7301
64291	chr18	12755312;12757608;12758767;12759399;12762566;12762909;12763482;12766803;12768538;12771299;12788320;12819505;12841184;12862107;12863143;12871078;12879723;12882196;12892167;12898203;12905023;12905194;12905971;12906888;12909858;12911077;12914502;12928261;12929008;12933580;12941632	12756307;12757698;12758890;12759515;12762692;12762998;12763589;12766985;12768635;12771433;12788395;12819907;12841346;12862713;12863380;12871184;12879979;12882277;12892289;12898301;12905086;12905267;12906015;12906949;12910002;12911162;12914613;12928335;12929093;12933702;12941841	-	5306	Osbpl1a	protein-coding	0.995875	6.13225	24.6254	2.94e-14	5.19e-13	22.7287
26380	chr12	86361117;86421644;86470146;86488547;86505815;86506349;86514281;86518821	86361538;86421964;86470555;86488663;86505925;86506510;86514550;86521628	+	4621	Esrrb	protein-coding	0.882038	7.92969	24.7999	2.63e-14	4.75e-13	22.7087
67155	chr19	26605160;26619684;26623881;26630670;26640388;26647021;26648984;26651549;26654341;26664051;26668753;26669114;26671084;26672699;26676634;26678316;26679074;26681871;26683809;26691345;26692181;26696176;26698346;26706068;26710458;26716115;26720729;26748403;26749852;26751122;26751824;26770938;26771508;26774173;26776101;26777335	26605233;26619944;26624010;26631131;26640649;26647147;26649157;26651722;26654511;26664104;26668883;26669171;26671184;26672846;26676797;26678382;26679184;26682113;26683922;26691452;26692267;26696222;26698512;26706231;26710685;26716192;26720947;26748544;26749947;26751156;26752041;26771043;26771609;26774305;26776243;26778321	+	6086	Smarca2	protein-coding	-1.99501	3.80345	-24.119	4.07e-14	6.83e-13	22.6987
21787	chr16	56690329;56694400;56697459;56701069;56704427;56705611;56712611;56717185	56691153;56694489;56697596;56701236;56704573;56705694;56712840;56717450	-	1948	Tfg	protein-coding	1.3227	5.39147	24.4282	3.33e-14	5.79e-13	22.693
381373	chr2	73271926;73273125	73272091;73275771	+	2813	Sp9	protein-coding	-3.64726	1.90583	-24.7072	2.79e-14	4.99e-13	22.6904
239667	chr15	100038664;100115845;100131902;100142022;100151151;100154157;100154396;100155034;100157170;100157877;100160442;100161978;100162679;100167856;100169267;100171120;100171603;100173217;100174427;100175201;100178442;100181309;100183007;100186141;100190032;100190256;100190987;100193840;100195791;100198941;100199460;100202188;100203132;100205083;100206397;100207758;100209579;100211984;100215178	100038909;100115916;100132027;100142147;100151363;100154306;100154544;100155156;100157367;100157968;100160552;100162101;100162788;100167958;100169331;100171213;100171722;100173331;100174566;100175337;100178522;100181436;100183121;100186342;100190141;100190336;100191110;100193961;100195902;100199050;100199590;100202356;100203302;100205144;100206454;100207832;100209756;100212107;100219473	+	9063	Dip2b	protein-coding	-0.91656	6.90699	-24.6714	2.85e-14	5.06e-13	22.6887
212442	chr1	13625898;13627356;13630065;13638231;13647385;13650721;13660329	13626904;13627437;13630213;13638409;13647511;13650884;13660509	-	1889	Lactb2	protein-coding	1.03554	6.19827	24.5571	3.07e-14	5.4e-13	22.6766
22026	chr6	92091418;92138987;92139780;92149604;92152315;92154335;92156572;92157406;92158330;92159212;92160319;92161913;92163121;92164188;92167459	92091742;92139026;92139890;92149804;92152417;92154514;92156719;92157499;92158463;92159389;92160440;92162052;92163258;92164293;92173058	+	7620	Nr2c2	protein-coding	-1.3279	5.21399	-24.354	3.5e-14	6.04e-13	22.6702
235533	chr9	96119429;96129001;96133389;96137745;96140539;96145672;96150216;96150435;96150736;96153081;96155393;96171460;96174690;96176230;96177419;96178921;96181772	96119612;96129094;96133464;96137838;96140670;96145747;96150277;96150508;96150796;96153207;96155497;96171554;96174793;96176289;96177552;96179006;96182953	+	2746	Gk5	protein-coding	1.48567	4.57848	24.227	3.8e-14	6.45e-13	22.6696
330260	chr6	5264624;5266112;5266965;5268978;5272325;5273001;5277872;5289013;5298212	5265479;5266240;5267046;5269178;5272451;5273166;5277927;5289083;5298373	-	1850	Pon2	protein-coding	-2.10159	3.58654	-24.0498	4.26e-14	7.1e-13	22.6681
238130	chr12	40446053;40621221;40623803;40626337;40631522;40636083;40640361;40649338;40668406;40669008;40672741;40676702;40692914;40702861;40704331;40710795;40725647;40729849;40730044;40730288;40731825;40733178;40737368;40745659;40747980;40755767;40766239;40777190;40779123;40779646;40788228;40790076;40794597;40794768;40795637;40799657;40806849;40810445;40812220;40816190;40817589;40820592;40828780;40829612;408…	40446394;40621304;40623843;40626392;40631618;40636231;40640445;40649489;40668487;40669068;40672873;40676790;40693039;40702985;40704493;40710901;40725803;40729946;40730127;40730388;40731906;40733348;40737560;40745786;40748114;40755865;40766333;40777265;40779223;40779704;40788376;40790161;40794623;40794863;40795697;40799750;40806997;40810531;40812324;40816331;40817755;40820678;40828956;40829695;408…	+	8072	Dock4	protein-coding	-1.36353	4.89136	-24.2296	3.79e-14	6.45e-13	22.6308
320557	chr13	97067287;97071643;97091818;97093591;97094062;97097540;97106954;97110023;97111296;97113639;97114109;97118375;97122692;97126496	97067322;97071711;97091952;97093690;97094147;97097711;97107133;97110151;97111402;97113678;97114259;97118531;97122892;97129522	+	4590	Fam169a	protein-coding	1.12864	6.65528	24.5436	3.09e-14	5.44e-13	22.625
20841	chr7	110061702;110069484;110070478;110071372;110072122;110074068;110075641;110077057;110080268;110081792;110083191;110086113;110088728;110091765;110093070;110094291	110061775;110069602;110070570;110071455;110072202;110074264;110075715;110077176;110080343;110081917;110083370;110086340;110088876;110091926;110093216;110095392	+	3013	Zfp143	protein-coding	1.26658	5.40317	24.3248	3.56e-14	6.13e-13	22.6204
240752	chr1	133046012;133066212;133070318;133071174;133071602;133074511;133074779;133075811;133077326;133078219;133079644;133080961;133084818;133085501;133086937;133088188;133089966;133090171;133090681;133091561;133092272;133093656;133094698;133098631;133099153;133099605;133100725;133101330;133102280;133103353;133103801;133104987;133105973	133046423;133067229;133070418;133071328;133071722;133074622;133074858;133075874;133077472;133078252;133079839;133081083;133084985;133085612;133087079;133088376;133090059;133090265;133090861;133091668;133092364;133093785;133094834;133098800;133099309;133099714;133100926;133101454;133102397;133103434;133103907;133105115;133108688	+	7929	Pik3c2b	protein-coding	1.69765	5.02082	24.2229	3.81e-14	6.46e-13	22.6154
68948	chr5	122364584;122366314;122367348;122367599;122369517;122370515;122371883	122364919;122366396;122367519;122367728;122369638;122370573;122371963	-	983	Fam216a	protein-coding	-1.13313	5.71827	-24.3533	3.5e-14	6.04e-13	22.5994
20481	chr4	155154075;155157946;155159288;155159696;155160580;155160834;155221552	155157529;155158176;155159580;155159958;155160695;155160956;155222535	-	5465	Ski	protein-coding	-1.24309	6.84274	-24.5225	3.14e-14	5.5e-13	22.5992
76524	chr9	62838787;62844570;62845954;62846966;62847585;62849109;62850617	62838954;62844684;62846052;62847154;62847640;62849231;62852002	+	2136	Cln6	protein-coding	-1.69352	4.28026	-24.0418	4.29e-14	7.12e-13	22.5917
117146	chr5	114380607;114384315;114387094;114387381;114388723;114389065;114390390;114392098;114393077;114398408;114398762;114399790;114401268;114402522;114404540;114406172;114406746;114407544;114408097;114411019;114411304;114412166;114412422;114412851;114415202;114415577;114418538;114419478	114380975;114384402;114387278;114387501;114388782;114389169;114390486;114392183;114393159;114398513;114398882;114399967;114401437;114402689;114404711;114406290;114406860;114407643;114408216;114411195;114411414;114412303;114412487;114412909;114415384;114415688;114418630;114421166	+	5191	Ube3b	protein-coding	-1.0894	6.61256	-24.472	3.24e-14	5.65e-13	22.5824
100561	chr5	127595666;127600420;127601858;127603693;127604111;127604538;127608772;127616815	127596772;127600578;127602013;127603861;127604188;127604706;127609061;127617392	-	2706	Slc15a4	protein-coding	-1.14166	5.73077	-24.3183	3.58e-14	6.15e-13	22.5744
224640	chr17	27189600;27192932;27193103;27193838;27195325;27196136;27199363;27201637;27203659	27190790;27193034;27193204;27193983;27195404;27196212;27199438;27201677;27204438	-	2596	Lemd2	protein-coding	-1.35578	5.20683	-24.1901	3.89e-14	6.57e-13	22.5617
21689	chr11	72344720;72345586;72351828;72354699;72355210;72357485;72359679;72361793	72344971;72345782;72352050;72354842;72355338;72357650;72359885;72361880	-	1406	Tekt1	protein-coding	2.49558	2.87737	23.901	4.7e-14	7.7e-13	22.561
66881	chr6	86386006;86391676;86392137;86394409;86395914;86396973	86389371;86391828;86392348;86394583;86396120;86397150	-	4291	Pcyox1	protein-coding	-0.900127	6.89123	-24.4404	3.31e-14	5.76e-13	22.5342
22156	chr3	94612759;94614724;94615770;94616622;94622051;94622688;94628197;94632597;94634458;94635409;94638925;94639395;94658725	94614191;94614824;94615853;94616727;94622145;94622816;94628310;94632662;94634547;94635495;94639026;94639469;94658806	-	2564	Tuft1	protein-coding	-1.15706	5.15863	-24.1474	4e-14	6.72e-13	22.5335
56515	chr18	21001341;21001957;21008725;21010677;21017819;21020888;21024409;21026086	21001540;21002169;21008890;21010792;21017875;21020999;21024516;21028223	+	3110	Rnf138	protein-coding	1.69089	5.37911	24.1299	4.05e-14	6.79e-13	22.5047
74039	chr15	82997796;83001415;83010375;83014915;83016344;83022927	82999795;83001501;83010473;83015027;83016591;83023138	-	2759	Nfam1	protein-coding	-1.60529	4.00956	-23.86	4.83e-14	7.85e-13	22.4964
381379	chr2	84678402;84685191;84685603;84686191;84686866	84678661;84685447;84685699;84686285;84688215	+	2059	Med19	protein-coding	1.35437	4.92308	24.0353	4.3e-14	7.13e-13	22.4913
23792	chr1	63445904;63447728;63477679;63515577;63528758;63530235;63534286;63535135;63536919;63543119;63545431;63546416;63547727;63549747;63551761;63555155;63555814;63557408;63563409;63564145;63566602;63567849;63570910;63572887;63585365;63592608	63446412;63447948;63477755;63515640;63528840;63530298;63534358;63535208;63536984;63543190;63545594;63546500;63547817;63549795;63551860;63555226;63555903;63557488;63563459;63564208;63566707;63567968;63571078;63573221;63585455;63596515	+	6879	Adam23	protein-coding	1.15152	6.01759	24.2437	3.76e-14	6.4e-13	22.487
50799	chr6	6041218;6042559;6042741;6052765;6073402;6095147;6096670;6109181;6109937;6113938;6114225;6114970;6117099;6131629;6152408;6180971;6191264;6216996	6042332;6042649;6042899;6052903;6073542;6095227;6096722;6109339;6110024;6114022;6114318;6115108;6117245;6131768;6152523;6181113;6191317;6217173	-	3122	Slc25a13	protein-coding	0.966121	7.38365	24.4126	3.37e-14	5.84e-13	22.48
227737	chr2	32876134;32905769;32909849;32911341;32912420;32918993;32919496;32919703;32920953;32922069;32922558;32922856;32923047;32923431	32876404;32905899;32909977;32911446;32912587;32919108;32919600;32919865;32921140;32922224;32922674;32922963;32923158;32925253	+	3693	Fam129b	protein-coding	-1.10719	7.76195	-24.4372	3.31e-14	5.77e-13	22.4754
216881	chr11	71750703;71759578;71766789;71768629;71771853;71783258;71784269;71787718;71788669	71750825;71760266;71766903;71768813;71771974;71783417;71784433;71787918;71789647	+	2739	Wscd1	protein-coding	-3.19803	2.85069	-23.8012	5.02e-14	8.1e-13	22.4605
69640	chr11	61684410;61695110;61701643;61702457;61707365	61685055;61695277;61701767;61703717;61709950	+	4786	Fam83g	protein-coding	-1.65568	4.98988	-23.9804	4.46e-14	7.34e-13	22.4586
22612	chr5	32611171;32640331;32645008;32651657;32652963;32653157;32655106;32655428;32659035;32660752;32664269;32684551	32611837;32640603;32645107;32651755;32653066;32653306;32655261;32655607;32659111;32660905;32664400;32687066	+	4608	Yes1	protein-coding	1.25062	6.62201	24.2685	3.7e-14	6.31e-13	22.4442
14768	chr1	67000517;67004339;67004790;67006868;67009228;67009911;67020858;67034124;67038495	67003557;67004411;67004966;67007050;67009374;67010046;67021065;67034241;67038872	-	4461	Lancl1	protein-coding	-0.996504	6.11086	-24.1963	3.87e-14	6.55e-13	22.4438
67153	chr14	62332105;62346568;62348521;62350400;62353523;62360463;62361329;62364030;62365259;62370472;62372360	62332176;62346642;62348628;62350476;62353637;62360527;62361434;62364111;62365301;62370552;62372992	+	1457	Rnaseh2b	protein-coding	1.27146	5.30766	24.0453	4.28e-14	7.11e-13	22.4437
21877	chr11	117815519;117816447;117817102;117822097;117824671;117825601;117825714	117816139;117816566;117817191;117822190;117824781;117825632;117826014	-	1369	Tk1	protein-coding	1.31143	5.44463	24.0697	4.21e-14	7.05e-13	22.4431
70134	chr8	84010228;84010711;84011141;84012114	84010492;84010772;84011770;84012156	-	1000	2210011C24Rik	protein-coding	2.74007	2.47026	23.8102	4.99e-14	8.08e-13	22.4397
71819	chr9	61917277;61918900;61919612;61919875;61921019;61923905;61924632;61924970;61925530;61926360;61927037;61927348;61927554;61929664;61931801;61932075;61935380;61936663;61937082;61937430;61944203;61945350;61946612	61917679;61918970;61919693;61919957;61921246;61924216;61924811;61925143;61925687;61926518;61927163;61927467;61927633;61929766;61931922;61932187;61935550;61936772;61937218;61937535;61944331;61945419;61946799	-	3426	Kif23	protein-coding	0.995018	7.11088	24.3157	3.58e-14	6.15e-13	22.4328
80907	chr9	66955393;66967679;66970582;66971176;66974718;66975041	66956200;66967844;66970936;66971366;66974784;66975484	-	2031	Lactb	protein-coding	-1.13898	5.25394	-24.0179	4.35e-14	7.18e-13	22.4319
103172	chr10	75935573;75936238;75937307;75937575	75936004;75936445;75937454;75937734	+	948	Chchd10	protein-coding	1.39399	6.77781	24.2669	3.7e-14	6.31e-13	22.4319
11803	chr7	30434980;30435476;30435746;30435973;30436179;30436787;30438178;30439935;30440144;30441055;30441642;30442170;30442480;30442798;30443092;30444318;30445322	30435391;30435619;30435808;30436043;30436202;30436894;30438277;30440063;30440302;30441129;30441772;30442360;30442613;30442910;30443224;30444461;30445582	-	2392	Aplp1	protein-coding	1.96306	4.26818	23.7784	5.1e-14	8.21e-13	22.4189
67972	chr10	98915152;98968694;98979704;98986891;98987241;98991062;98993867;98994646;98996768;98999739;99001288;99003141;99009404;99010202;99010674;99014459;99014884;99015484;99016923;99018715;99022808	98915371;98969124;98979901;98987145;98987366;98991202;98993905;98994807;98996982;98999981;99001529;99003378;99009583;99010289;99010780;99014650;99015097;99015695;99017030;99018897;99026143	+	7130	Atp2b1	protein-coding	1.02851	6.06622	24.1522	3.99e-14	6.72e-13	22.4168
66515	chr17	46650338;46651437;46652460;46652725;46653750;46653986;46654434;46655515;46655844;46656994;46657444;46657632;46657928;46658322;46658608;46659062;46659467;46659863;46660059;46661294;46661636;46661925;46663058;46663322;46663538;46663968	46650715;46652018;46652611;46653198;46653888;46654182;46654659;46655752;46655949;46657221;46657534;46657803;46658033;46658417;46658783;46659195;46659649;46659969;46660241;46661454;46661852;46662231;46663203;46663448;46663743;46664364	+	5529	Cul7	protein-coding	-0.979557	7.40394	-24.3165	3.58e-14	6.15e-13	22.4146
71988	chr14	65819027;65821581;65824118;65824846;65826480;65827168;65828469;65829662;65831005;65832664;65833802	65820098;65821741;65824258;65824935;65826611;65827288;65828523;65829752;65831794;65832741;65833969	-	2899	Esco2	protein-coding	1.50536	6.81856	24.2084	3.84e-14	6.51e-13	22.3909
319277	chr10	83543941;83546785;83549462;83549599;83550264;83550881;83554734;83555573;83556013;83556803;83558598;83558818;83560366;83564411;83569968;83571353;83572093;83572358;83573776;83574443;83576017;83576675;83579482;83580257;83581257;83583255;83585818;83586634;83588157;83590291;83590987;83591689;83594171	83544102;83546924;83549515;83549664;83550309;83550948;83554816;83555615;83556116;83556923;83558721;83558945;83560526;83564537;83570093;83571460;83572239;83572437;83573881;83574559;83576185;83576829;83579556;83580361;83581391;83583363;83585884;83586720;83588304;83590387;83591183;83591788;83596473	+	5858	A230046K03Rik	protein-coding	1.19997	6.74164	24.207	3.85e-14	6.51e-13	22.3907
12751	chr7	105744847;105746943;105747387;105747659;105748582;105748883;105749225;105749537;105749860;105750180;105751590;105751982;105752171	105746772;105747068;105747545;105747779;105748651;105749071;105749423;105749712;105749987;105750330;105751729;105752053;105752207	-	3494	Tpp1	protein-coding	-1.40232	5.88482	-24.0303	4.32e-14	7.14e-13	22.3669
230861	chr4	137993456;137993982;138045343;138057949;138082893;138087533;138095909;138096752;138097245;138103315;138105314;138120346;138125810;138146285;138151582;138156612;138158391;138163447;138165733;138170477;138171055;138172573;138175848;138176938;138177917;138180490;138183128;138184652;138188046;138190615;138191967;138194044;138198079;138201921;138203345;138205973	137993627;137994144;138045418;138058077;138082988;138087565;138095929;138096931;138097359;138103412;138105436;138120454;138126634;138146373;138151828;138156745;138158510;138163617;138165930;138170623;138171291;138172677;138175980;138177032;138178010;138180607;138183345;138184767;138188218;138190740;138192048;138194142;138198225;138202002;138203491;138207079	+	6325	Eif4g3	protein-coding	-1.72386	4.20837	-23.6952	5.39e-14	8.64e-13	22.3661
53892	chr11	85311254;85326864;85332251;85337065;85339554;85345636	85311923;85327092;85332375;85337255;85339796;85347071	+	2894	Ppm1d	protein-coding	-1.04602	6.26531	-24.0687	4.21e-14	7.05e-13	22.3411
226539	chr1	161040613;161043613;161044959;161045258;161046777;161049938;161051331;161053941;161056461;161057447;161060045;161060736;161062782;161063247;161065225;161069080;161069993	161041930;161043688;161045069;161045476;161046929;161050000;161051438;161054120;161056530;161057553;161060091;161060859;161062877;161063348;161065291;161069179;161070632	-	3581	Dars2	protein-coding	0.955899	6.26243	24.0639	4.22e-14	7.05e-13	22.334
12824	chr15	97975602;97976642;97977182;97977721;97978338;97978878;97979165;97979385;97979632;97979875;97980146;97980448;97980725;97981515;97982004;97982529;97982916;97983238;97983652;97983961;97984362;97984720;97985004;97985282;97985563;97985863;97986308;97986742;97987293;97987485;97987668;97988084;97988563;97988762;97988948;97989286;97990913;97991344;97994017;97994544;97994868;97995016;97995360;97996103;979…	97976186;97976884;97977369;97978009;97978445;97978931;97979272;97979438;97979739;97979928;97980253;97980555;97980886;97981568;97982057;97982636;97982969;97983291;97983705;97984014;97984469;97984818;97985048;97985335;97985616;97985916;97986361;97986840;97987346;97987583;97987721;97988191;97988616;97988860;97988992;97989384;97990966;97991388;97994070;97994588;97994921;97995069;97995413;97996156;979…	-	5133	Col2a1	protein-coding	-1.80778	4.11558	-23.6208	5.66e-14	8.99e-13	22.3288
15108	chrX	152001896;152002278;152003361;152003653;152003862;152004139	152001934;152002442;152003525;152003781;152003970;152004442	+	911	Hsd17b10	protein-coding	1.46556	5.22251	23.8485	4.87e-14	7.9e-13	22.3261
78088	chr5	93041123	93045022	-	3900	Sowahb	protein-coding	-1.65283	4.21239	-23.6383	5.6e-14	8.92e-13	22.3244
50935	chr2	32599709;32606961;32608042;32609226;32612224;32614781;32618497;32619340	32599836;32607111;32608096;32609316;32612403;32615187;32618604;32620804	+	2585	St6galnac6	protein-coding	1.65141	3.90142	23.5799	5.82e-14	9.12e-13	22.3157
240095	chr17	36986855;36987416;36987655;36988505;36988935;36989429	36987018;36987523;36987930;36988780;36989204;36989504	-	1170	H2-M5	protein-coding	1.62027	4.1396	23.614	5.69e-14	9.01e-13	22.3117
17089	chr5	38220482;38224627;38225889;38227855;38228050;38230561;38231273;38233242;38233991	38220635;38224797;38226003;38227962;38228133;38230990;38231359;38233327;38234306	+	1551	Lyar	protein-coding	1.00456	6.52656	24.0665	4.22e-14	7.05e-13	22.3104
225358	chr18	34442351;34443901;34445277;34445532;34448026;34448368;34451208;34454034;34454654;34457664;34462061;34462961;34465156;34473550;34486979;34494157;34494599;34497334;34497968;34499686;34506529	34442765;34444002;34445440;34445615;34448121;34448451;34451437;34454115;34454783;34457874;34462208;34463009;34465220;34473685;34487139;34494298;34494776;34497546;34498159;34499852;34506823	-	3344	Fam13b	protein-coding	-1.29281	5.63763	-23.8817	4.76e-14	7.79e-13	22.2923
22145	chr1	75214974;75216827;75217212;75219193	75216593;75216975;75217434;75219253	-	2053	Tuba4a	protein-coding	1.5109	5.908	23.9084	4.68e-14	7.67e-13	22.2796
18176	chr3	103058285;103058905;103060201;103062374;103063330;103064116;103064234	103058440;103059032;103060379;103062533;103063453;103064157;103067914	+	4470	Nras	protein-coding	1.01291	6.9516	24.0543	4.25e-14	7.09e-13	22.2662
227399	chr1	97706046;97711723;97713004;97719834;97723670;97727189;97727395;97728918;97729911;97733886;97734967;97740462;97740824;97741070;97744057;97745163;97745395;97746418;97747547;97749542;97750567;97752704;97755055;97755886;97756844;97759169;97761425;97769855	97707830;97711848;97713144;97719906;97723834;97727305;97727502;97729032;97730038;97734109;97735108;97740644;97740945;97741195;97744142;97745272;97745470;97746504;97747648;97749663;97750728;97752805;97755209;97755971;97756934;97759364;97761821;97770092	-	5565	Ppip5k2	protein-coding	1.04375	6.61381	24.0089	4.38e-14	7.22e-13	22.2636
12520	chr7	143052750;143062493;143065209;143065943;143066248;143066661;143067147;143067312	143053066;143062607;143065306;143066017;143066352;143066762;143067233;143067930	+	1518	Cd81	protein-coding	-0.890639	8.07985	-24.1488	4e-14	6.72e-13	22.2604
17075	chr17	87635979;87636458;87639896;87640288;87641434;87642102;87643542;87646137;87649614;87650428	87636072;87636894;87640003;87640528;87641499;87642165;87643643;87646340;87649658;87651127	+	2061	Epcam	protein-coding	1.02705	6.14074	23.9352	4.6e-14	7.54e-13	22.2598
54648	chrX	7731714;7735072;7735301;7735774;7736692;7737299;7737894;7738162;7738370;7741212	7734098;7735170;7735475;7735836;7736977;7737439;7738027;7738252;7738523;7741324	-	3641	Ccdc120	protein-coding	-1.17753	5.27298	-23.7653	5.14e-14	8.27e-13	22.2573
102632	chr9	104063703;104073622;104075817;104076330;104078563;104081231;104081698;104082791;104084161;104090258;104091592;104095521;104097354;104113462;104114453;104115278;104116165;104123047;104124018;104126582	104063903;104073721;104075942;104076491;104078727;104081372;104081819;104082897;104084287;104090335;104091730;104095628;104097452;104113528;104114538;104115349;104116319;104123163;104124127;104127646	+	3348	Acad11	protein-coding	-0.918655	6.96572	-24.0378	4.3e-14	7.13e-13	22.2543
66176	chr11	115182832;115183355;115183625;115184483;115185007;115186749;115187119	115183265;115183449;115183684;115184626;115185116;115186837;115187316	-	1130	Nat9	protein-coding	-1.36522	5.03914	-23.6887	5.41e-14	8.67e-13	22.242
11737	chr9	62341343;62371720;62372062;62373485;62374654;62377300;62377554	62341554;62371869;62372184;62373677;62374751;62377363;62378802	+	2089	Anp32a	protein-coding	1.85816	6.02695	23.8551	4.85e-14	7.87e-13	22.2399
12447	chr7	38097984;38098992;38099247;38099468;38099789;38100555;38102786;38103046;38106279;38106596;38106787;38107322	38098637;38099149;38099358;38099602;38099884;38100701;38102921;38103194;38106347;38106683;38106829;38107490	-	1956	Ccne1	protein-coding	0.910954	7.23243	24.0324	4.31e-14	7.14e-13	22.2299
20562	chr19	41600257;41601489;41602087;41603326;41604312;41606360;41608318;41610801;41611002;41614402;41614790;41616665;41624498;41625522;41627241;41629870;41630764;41634155;41634600;41637469;41637777;41638569;41638883;41639703;41646016;41646968;41648516;41648985;41649412;41650677;41651155;41651631;41652695;41721040;41727070;41729055;41743212	41600689;41601700;41602375;41603480;41604442;41606588;41608455;41610894;41611141;41614499;41614914;41616828;41624569;41625593;41627312;41629938;41630896;41634321;41634743;41637612;41637851;41638713;41638906;41639866;41646159;41647039;41648587;41649056;41649559;41650840;41651226;41651702;41652766;41721111;41727141;41729126;41743856	-	5238	Slit1	protein-coding	-3.06425	2.25931	-23.599	5.74e-14	9.05e-13	22.2263
67522	chr17	30622441;30624200;30624881;30626782	30622694;30624613;30624933;30626905	-	845	1700097N02Rik	ncRNA	2.93503	2.15502	23.5972	5.75e-14	9.05e-13	22.2229
15289	chr5	149047227;149049727;149050295;149050588;149052900	149048913;149049901;149050440;149050751;149053037	-	2310	Hmgb1	protein-coding	1.0846	7.42269	23.9894	4.44e-14	7.3e-13	22.1892
68988	chr7	3629985;3630558;3630845;3632668;3633304;3634124;3634693;3636201;3636662;3638631;3638858;3639576;3639789;3640797	3630056;3630742;3630905;3632751;3633401;3634230;3634862;3636358;3636751;3638758;3638930;3639704;3639887;3642485	+	3143	Prpf31	protein-coding	0.909242	7.16611	23.963	4.51e-14	7.41e-13	22.1866
320473	chr17	78752906;78755211;78756863;78760416;78762000;78762933;78765328;78766880;78768366;78773538;78788205;78791435;78795095;78795822;78796384;78801613;78803372;78805947;78808330;78810508;78813095;78814072;78815490;78816232;78817473;78818806;78820621;78821415;78824496;78826232;78827932;78829493;78830559;78831374;78834096;78835306	78753336;78755424;78757014;78760640;78762266;78763077;78765455;78767134;78768603;78773717;78788273;78791616;78795346;78796061;78796528;78801782;78803561;78806106;78808520;78810613;78813270;78814235;78815599;78816331;78817625;78818917;78820871;78821570;78824745;78826389;78828103;78829642;78830667;78831585;78834243;78835381	-	6437	Heatr5b	protein-coding	-1.00774	6.40918	-23.8612	4.83e-14	7.85e-13	22.1829
66960	chr2	12347264;12350929;12355277;12356905;12364447;12382103;12386609;12396179;12397493;12400023;12401025;12403998;12405860;12410001;12419159	12348203;12351000;12355364;12356977;12364519;12382183;12386679;12396258;12397566;12400137;12401076;12404168;12405920;12410080;12419460	-	2333	Fam188a	protein-coding	1.25098	5.05044	23.6153	5.68e-14	9.01e-13	22.1829
70747	chr3	102734770;102735215;102749758;102757293;102758157;102759310;102760897;102765185;102768877	102735065;102735315;102749860;102757390;102758231;102759408;102760968;102765268;102772310	+	4362	Tspan2	protein-coding	2.21706	3.2025	23.3038	7e-14	1.06e-12	22.1816
57342	chr7	112427706;112544177;112544733;112547511;112559929;112567763;112572871;112575355;112576400;112576936;112579656;112580950;112588540	112428100;112544266;112544803;112547613;112560069;112567878;112572929;112575374;112576461;112577004;112579757;112581022;112591688	+	4450	Parva	protein-coding	-1.63442	4.24479	-23.4348	6.41e-14	9.93e-13	22.1805
16421	chr15	102215995;102216472;102216892;102217247;102217774;102218497;102219174;102222089;102222342;102222641;102223331;102224302;102224558;102227398;102231851	102216267;102216632;102217097;102217466;102217997;102218690;102219320;102222178;102222437;102222799;102223572;102224472;102224759;102227601;102231935	-	2674	Itgb7	protein-coding	1.5918	4.52334	23.4837	6.21e-14	9.66e-13	22.173
268903	chr16	76290862;76330746;76352472;76372872	76295015;76330864;76352549;76373049	-	4529	Nrip1	protein-coding	-1.2387	5.14979	-23.6026	5.73e-14	9.04e-13	22.1634
544791	chr11	67327103;67328950;67329175;67330866;67330984;67332501;67334549;67334703;67334899;67337641;67340323;67341159;67341415;67342241;67344805;67344981;67347889;67348800;67349570;67350234;67351954;67353573;67354647;67354902;67355803;67358108;67358321;67360281;67361249;67362405;67363187;67364462;67364852;67367153;67367557;67369105;67369309;67370920;67371488	67327306;67329093;67329331;67330893;67331095;67332593;67334612;67334801;67335002;67337779;67340441;67341308;67341585;67342550;67344878;67345068;67348006;67348923;67349706;67350489;67352196;67353749;67354792;67354992;67356192;67358234;67358439;67360477;67361432;67362570;67363311;67364770;67365055;67367278;67367727;67369209;67369404;67371054;67371502	+	5817	Myh13	protein-coding	1.24384	5.08305	23.5821	5.81e-14	9.11e-13	22.1551
56736	chr18	38296635;38296805;38297500;38299754;38300429;38301656;38307865;38309485;38313212;38314673;38316525	38296798;38297205;38297575;38299926;38300590;38301807;38308395;38309713;38313384;38314803;38317849	+	3517	Rnf14	protein-coding	-0.978033	6.80298	-23.8683	4.8e-14	7.84e-13	22.1513
13206	chr13	112598333;112599618;112599852;112601412;112604487;112611975;112613697;112620616;112621208;112622165;112622658;112622799;112624781;112625345;112626322;112628838;112633885;112635968;112641150;112644509;112651332;112652276	112599031;112599734;112600122;112601511;112604632;112612141;112613826;112620770;112621360;112622307;112622705;112622846;112624822;112625425;112626423;112628897;112633935;112636045;112641227;112644566;112651418;112652310	-	2849	Ddx4	protein-coding	-1.57988	4.33114	-23.408	6.53e-14	1.01e-12	22.1491
12177	chr14	66985240;66989135;66989406;66993877;66999521;67008688	66987775;66989284;66989509;66993949;66999704;67008877	-	3237	Bnip3l	protein-coding	1.00177	6.87463	23.873	4.79e-14	7.82e-13	22.1471
19876	chr16	72663149;72742126;72904630;72933213;72933674;72935659;72960081;72962154;72970167;72971980;72972208;72972471;72977686;72978560;72979845;72983709;72989599;72993667;72995117;73001919;73004410;73006824;73009612;73012875;73024132;73027757;73035659;73042991;73044348	72664194;72742452;72904787;72933333;72933812;72935786;72960205;72962325;72970372;72972061;72972376;72972637;72977807;72978791;72979966;72983880;72989796;72993693;72995159;73002073;73004745;73006931;73009756;73013123;73024538;73027909;73035967;73043187;73046100	+	7568	Robo1	protein-coding	-1.41166	5.63472	-23.656	5.53e-14	8.83e-13	22.1405
71458	chrX	12036737;12038912;12039250;12040385;12041502;12046856;12047423;12048303;12048995;12054969;12055639;12056344;12060130;12061522;12079818;12160289	12037917;12039068;12039327;12040530;12041668;12047113;12047748;12048647;12049252;12055155;12055692;12059190;12060208;12061646;12080553;12160355	-	7011	Bcor	protein-coding	-1.12101	6.54445	-23.8013	5.02e-14	8.1e-13	22.1307
19156	chr10	60277628;60284461;60291639;60292505;60293349;60294533;60294965;60295946;60297537;60299098;60299464;60299779;60300148;60300538;60300774;60301694	60277782;60284531;60291772;60292579;60293474;60294730;60295108;60296002;60297545;60299229;60299559;60300058;60300305;60300618;60300881;60302600	+	2731	Psap	protein-coding	-0.823232	8.91399	-24.0225	4.34e-14	7.17e-13	22.1297
235472	chr9	72807274;72809455;72842695;72844858;72847909;72848314;72849752;72851481;72854956;72856775;72858761;72890777;72891809;72892228;72893824;72904705;72906148;72907701;72910637;72911904	72807532;72809757;72842839;72844991;72848046;72848472;72849911;72851728;72855120;72857080;72858949;72890872;72891995;72892355;72893994;72904887;72906268;72907863;72910741;72917307	+	8764	Prtg	protein-coding	-0.977447	6.4477	-23.7779	5.1e-14	8.21e-13	22.1208
98170	chr19	10857829;10859564;10860124;10861530;10863223;10863465;10863955;10865256;10866469;10866930;10869539	10859151;10859755;10860397;10861732;10863366;10863660;10864104;10865587;10866687;10867144;10869779	-	3489	Tmem132a	protein-coding	-1.22135	4.9572	-23.4968	6.15e-14	9.61e-13	22.1163
11920	chr9	53437122;53440031;53441674;53442407;53443992;53445345;53448053;53450518;53451549;53453353;53453532;53454289;53454716;53455768;53456494;53457378;53458803;53459713;53460891;53461112;53462481;53464153;53465032;53465226;53467965;53471352;53473616;53479581;53480574;53482302;53484073;53486009;53486814;53487906;53488550;53490111;53490914;53492241;53493038;53494612;53495852;53497133;53498857;53499122;535…	53439929;53440167;53441737;53442521;53444078;53445510;53448202;53450634;53451689;53453435;53453670;53454447;53454829;53455975;53456708;53457491;53458976;53459947;53461010;53461120;53462585;53464301;53465134;53465314;53468052;53471507;53473703;53479758;53480750;53482443;53484244;53486104;53486946;53488070;53488721;53490310;53491040;53492368;53493284;53494781;53496025;53497253;53498987;53499197;535…	-	11964	Atm	protein-coding	0.992315	7.30121	23.8603	4.83e-14	7.85e-13	22.1072
319278	chr9	20868642;20869330;20869604;20871197;20871376;20872868;20873110;20873542	20868936;20869453;20869653;20871235;20871525;20872971;20873264;20874307	+	1683	A230050P20Rik	protein-coding	3.45508	2.32608	23.4205	6.47e-14	9.99e-13	22.1066
208836	chr7	79392338;79395893;79399136;79401825;79402269;79402511;79405143;79406167;79407324;79409140;79411161;79412619;79417836;79420263;79424206;79424894;79426107;79427127;79430430;79432114;79433183;79433433;79434136;79435197;79438234;79439618;79440631;79443741;79443948;79444158;79444401;79444675;79445537;79445670;79448250;79448820;79449073;79449640	79392391;79395995;79399208;79401955;79402425;79402568;79405184;79406290;79407409;79409266;79411253;79412755;79418016;79420350;79424333;79424964;79426221;79427249;79430498;79432215;79433359;79433554;79434300;79435376;79438400;79439694;79440747;79443792;79444075;79444226;79444509;79444862;79445590;79445729;79448312;79448915;79449180;79450264	+	4619	Fanci	protein-coding	1.08728	6.98831	23.8249	4.94e-14	8.01e-13	22.1061
76257	chr9	107651155;107652129;107655023;107655256;107655585;107655935;107656100;107656456;107656595;107657630;107657810;107657994;107658637;107658932;107659095;107667136;107668853	107652038;107652232;107655167;107655380;107655685;107656014;107656270;107656514;107656677;107657711;107657902;107658067;107658752;107659010;107659244;107667399;107668968	-	2726	Slc38a3	protein-coding	-2.54924	3.04326	-23.1866	7.58e-14	1.14e-12	22.0975
12836	chr9	108953745;108954330;108955195;108955443;108955629;108955892;108956130;108956362;108956561;108956793;108956987;108957214;108958092;108958324;108958563;108959237;108959491;108959936;108960165;108960514;108960952;108961346;108961555;108961780;108962157;108962366;108962600;108962865;108962985;108963103;108963218;108963888;108964050;108964221;108964413;108964587;108965050;108965158;108965301;108965438…	108953832;108954510;108955354;108955536;108955790;108956055;108956259;108956478;108956707;108956909;108957136;108957342;108958235;108958449;108958706;108959356;108959634;108960061;108960311;108960636;108961098;108961480;108961701;108961916;108962283;108962512;108962772;108962900;108963011;108963147;108963280;108963959;108964085;108964256;108964484;108964664;108965076;108965211;108965363;108965497…	+	9198	Col7a1	protein-coding	-1.99431	4.68926	-23.3722	6.69e-14	1.02e-12	22.093
77938	chr7	132712084;132759389;132771578;132779136;132786868;132813066	132716002;132760167;132771629;132779385;132786935;132813196	-	5199	Fam53b	protein-coding	-1.42605	4.35609	-23.3175	6.94e-14	1.05e-12	22.0786
239719	chr16	13256481;13256560;13265079;13326382;13332014;13332619;13358421;13378264;13379840;13381528;13384194;13385606;13394823;13398224;13400080;13400653;13403155;13405249;13405765;13409617;13412160	13256554;13256569;13265139;13326571;13332076;13332922;13358759;13378329;13379895;13381603;13384355;13385784;13394960;13398486;13400179;13401684;13403310;13405407;13405902;13409677;13417529	+	8997	Mkl2	protein-coding	-1.05245	5.42883	-23.5102	6.1e-14	9.53e-13	22.056
58887	chr6	48593883;48594791;48596293	48594052;48594976;48599082	+	3146	Repin1	protein-coding	-1.50448	4.59899	-23.3214	6.92e-14	1.05e-12	22.052
18752	chr7	3303532;3304306;3305344;3310564;3310836;3312389;3313698;3314133;3314512;3318860;3319531;3322340;3322517;3323456;3327416;3329035;3329828;3330146	3303959;3304337;3305426;3310675;3310967;3312545;3313832;3314220;3314541;3319012;3319719;3322431;3322579;3323594;3327496;3329142;3329968;3330696	+	2714	Prkcg	protein-coding	2.20405	3.18429	23.1123	7.98e-14	1.19e-12	22.052
20852	chr10	127642986;127646891;127647685;127648106;127650696;127650953;127651157;127651950;127652191;127652985;127653207;127654926;127655297;127656924;127657108;127657556;127658197;127658357;127658629;127659433;127659589;127659795	127643249;127647027;127647823;127648189;127650834;127651005;127651305;127652081;127652379;127653072;127653329;127655018;127655503;127657018;127657244;127657702;127658260;127658461;127658700;127659498;127659717;127660987	+	3805	Stat6	protein-coding	1.32864	5.16053	23.4337	6.42e-14	9.93e-13	22.0432
60455	chr17	26113316;26116759;26117019;26117411;26117739;26118110;26118862;26119033;26119399;26120284;26120539;26121540;26121938	26113567;26116933;26117226;26117538;26118007;26118429;26118952;26119156;26119535;26120462;26120685;26121656;26123254	+	3464	Tmem8	protein-coding	1.50607	4.76598	23.3461	6.81e-14	1.04e-12	22.0424
224045	chr16	20498817;20500185;20501364;20501630;20501904;20502243;20502530;20504645;20505199;20505462;20506128;20506381;20507008;20508028;20508709;20508961	20499096;20500309;20501549;20501807;20501984;20502320;20502842;20504790;20505340;20505563;20506235;20506471;20507131;20508153;20508819;20509325	+	2556	Eif2b5	protein-coding	0.984421	7.94362	23.8055	5.01e-14	8.1e-13	22.0308
230700	chr4	119539688;119560603;119573476;119585750;119602409;119609990;119616508;119619284;119619935;119621601;119623221;119624897;119626289	119539845;119560663;119573800;119585824;119602492;119610091;119616636;119619464;119620348;119621702;119623412;119625004;119629119	+	4762	Foxj3	protein-coding	-1.03683	6.32124	-23.6131	5.69e-14	9.01e-13	22.0202
70645	chr2	119609532;119611752;119613012;119615532;119617854;119618158	119610364;119611855;119613093;119615654;119617920;119618505	-	1557	Oip5	protein-coding	1.524	4.19027	23.2027	7.5e-14	1.13e-12	22.0188
20351	chr3	88435962;88437803;88438183;88438443;88440698;88447991;88449680;88449988;88450511;88451345;88451688;88452020;88452971;88454679;88455548;88458811;88458987;88461147	88437252;88437900;88438340;88438561;88440878;88448141;88449852;88450112;88450627;88451450;88451786;88452082;88453131;88454846;88455761;88458884;88459101;88461182	-	3449	Sema4a	protein-coding	2.3262	3.0638	23.0616	8.26e-14	1.22e-12	22.0174
170756	chr5	120511192;120513120;120519630;120519866;120520603;120520774;120520968;120521754;120523999;120524204;120525659;120527741;120529510;120530316;120531081;120532860	120511283;120513332;120519782;120519918;120520660;120520886;120521135;120521861;120524058;120524334;120525800;120527862;120529663;120530396;120531148;120534024	+	2881	Slc8b1	protein-coding	-0.994129	6.22111	-23.5946	5.76e-14	9.05e-13	22.017
217653	chr12	65132734;65133804;65136750;65138645;65140733;65143223;65148722;65152688;65153806;65154719;65156992;65158395;65161403;65172449	65133625;65133858;65136849;65138796;65140890;65143392;65149550;65152830;65153893;65154849;65157065;65158861;65162028;65172580	-	4017	Mis18bp1	protein-coding	0.948406	6.6582	23.6503	5.55e-14	8.86e-13	22.0097
12608	chr2	167688915	167690418	+	1504	Cebpb	protein-coding	-1.37295	4.57596	-23.2583	7.22e-14	1.09e-12	22.0068
232086	chr6	72355483;72356131;72356722;72357050;72357949;72358308;72358579;72359006	72355544;72356312;72356769;72357136;72358016;72358435;72358756;72359762	+	1510	Tmem150a	protein-coding	-1.53935	4.95277	-23.32	6.93e-14	1.05e-12	22.0037
71775	chr9	103250530;103251791;103254640;103256565;103259370;103263030;103266203;103267632;103268312;103269612;103272487;103274941;103277456;103279373;103281035;103282495;103288181	103250662;103251977;103254824;103256629;103259511;103263185;103266259;103267722;103268454;103269783;103272665;103274996;103277603;103279534;103281143;103282667;103288297	-	2275	1300017J02Rik	protein-coding	-2.403	2.94532	-23.0475	8.34e-14	1.23e-12	22.0022
14229	chr17	28399095;28402609;28406085;28410510;28412034;28415869;28428352;28429221;28437992;28440928	28401151;28402848;28406270;28410593;28412124;28416025;28428466;28429363;28438136;28441056	-	3347	Fkbp5	protein-coding	1.24282	6.56636	23.6102	5.7e-14	9.01e-13	21.9954
14674	chr11	109362794;109365536;109392346;109395914	109363256;109365762;109392396;109401369	+	6197	Gna13	protein-coding	-1.00836	7.00243	-23.6643	5.5e-14	8.79e-13	21.9941
19771	chr7	79374870;79375897;79377227;79379959;79381633;79383612;79383934;79384659;79386689	79375718;79376007;79377385;79380137;79381837;79383740;79384044;79384779;79387027	-	2203	Rlbp1	protein-coding	1.76898	3.72864	23.0833	8.13e-14	1.21e-12	21.994
100043508	chr6	85843980	85844462	+	483	Gm9769	pseudo	1.18611	5.32789	23.4007	6.56e-14	1.01e-12	21.9934
70788	chr1	91351073;91353606;91355452;91357334;91357755;91358788;91359336;91361009	91351135;91354452;91355587;91357420;91357910;91358976;91359481;91362404	+	3020	Klhl30	protein-coding	-3.18197	1.90555	-23.3886	6.61e-14	1.01e-12	21.9799
66912	chr12	36091835;36092967;36104262;36107496;36109705;36113968;36118987;36120719;36123935;36129992;36134891;36156668	36092309;36093089;36104400;36107642;36109875;36114077;36119122;36120784;36124038;36130168;36134955;36156825	-	1871	Bzw2	protein-coding	0.972202	6.64718	23.6035	5.73e-14	9.04e-13	21.9784
70930	chr13	49653350;49653529;49654347;49655173;49656675;49658696;49659950;49660958;49664054;49664728;49665379;49667355;49669709;49672552;49675386;49676322;49676755;49678386	49653397;49653682;49654502;49655235;49656753;49658831;49660018;49662775;49664167;49664850;49665469;49667490;49669786;49672823;49675512;49676389;49676834;49679015	+	4242	Nol8	protein-coding	1.04368	6.85567	23.6271	5.64e-14	8.96e-13	21.9783
636931	chr9	114511268;114515733;114524954;114562305	114514096;114515867;114525121;114564369	-	5197	Trim71	protein-coding	-0.859857	8.36984	-23.7503	5.19e-14	8.34e-13	21.9694
70984	chr9	15283337;15287356;15290667;15292000;15294432;15294686;15297843;15301367;15306037;15306214	15284991;15287472;15290816;15292176;15294533;15294759;15297941;15301607;15306167;15306448	-	2981	4931406C07Rik	protein-coding	1.75741	4.29662	23.1331	7.86e-14	1.17e-12	21.9639
68816	chr17	29250835;29252250;29261737;29263872	29251725;29252318;29261891;29263971	-	1215	Ppil1	protein-coding	0.871687	6.79176	23.5964	5.75e-14	9.05e-13	21.9597
20431	chr10	128706258;128714045;128714282;128715221;128715527;128715927;128717751;128718058;128718598;128718900;128719885	128706358;128714155;128714428;128715355;128715688;128716550;128717867;128718142;128718803;128718987;128720238	+	2130	Pmel	protein-coding	1.99171	3.13425	22.9654	8.82e-14	1.28e-12	21.9516
68048	chr7	78895927;78902230;78905843;78907144	78896014;78902830;78906043;78908833	+	2580	Aen	protein-coding	-0.941942	7.37025	-23.6318	5.62e-14	8.94e-13	21.9444
272551	chr8	120581266;120582082;120586093;120588725;120588926	120581811;120582208;120586192;120588839;120589075	-	1038	Gins2	protein-coding	1.20451	5.44323	23.3497	6.79e-14	1.04e-12	21.9423
53605	chr10	111473192;111480617;111485499;111486644;111490028;111490377;111491009;111492087;111492842;111493297;111493550;111494171;111494795;111495325;111496040	111473351;111481316;111485584;111486746;111490169;111490457;111491137;111492158;111492981;111493442;111493569;111494293;111494824;111495375;111498150	+	4094	Nap1l1	protein-coding	1.3774	7.82584	23.6644	5.5e-14	8.79e-13	21.9407
17160	chr5	36806813;36807786;36809004;36810292;36812947;36813269;36813732;36814329;36815319;36816059;36817556;36818462;36820882;36821837;36824092;36826040;36827864;36829628;36830438	36807210;36807903;36809116;36810408;36813160;36813379;36813978;36814520;36815593;36816243;36817697;36818652;36821080;36822014;36824207;36826212;36827969;36829774;36830649	-	3434	Man2b2	protein-coding	-1.67641	4.53895	-23.1322	7.87e-14	1.17e-12	21.9334
66102	chr11	70454234;70455655;70458745;70459029;70459378	70455444;70456062;70458827;70459167;70459984	-	2448	Cxcl16	protein-coding	-2.27474	3.08302	-22.9377	8.99e-14	1.3e-12	21.9331
77644	chrX	36848543;36852639;36853330;36854283;36856852;36863624;36864009	36851162;36852731;36853419;36854421;36856893;36863741;36864246	-	3340	C330007P06Rik	protein-coding	1.64647	4.68004	23.162	7.71e-14	1.15e-12	21.9299
15114	chr11	100347327;100351210;100351418;100351843;100352185;100353544;100353688;100353957;100354246;100354672;100355690	100349619;100351301;100351552;100351905;100352315;100353610;100353787;100354135;100354362;100354748;100356141	-	3706	Hap1	protein-coding	1.11517	5.84238	23.4039	6.55e-14	1.01e-12	21.9268
14884	chr7	46796094;46801672;46803817;46804961;46806736;46808537;46808800;46812432;46812662;46814116;46815300;46816384;46816897;46819122;46822823	46796288;46801840;46804009;46805123;46806829;46808686;46808879;46812559;46812749;46814204;46815417;46816474;46817012;46819214;46823800	+	2745	Gtf2h1	protein-coding	1.05906	7.07166	23.5766	5.83e-14	9.13e-13	21.9264
55980	chr3	10313540;10316103;10321612;10322904;10324052;10326107;10328345;10328943;10331322	10315301;10316254;10321720;10323012;10324097;10326211;10328478;10329008;10331439	-	2601	Impa1	protein-coding	0.959784	6.12441	23.4484	6.35e-14	9.86e-13	21.9219
214290	chr13	59771879;59778752;59782018;59784765;59785721;59785895;59788460;59789184;59789412;59789848;59791776;59794447;59796820;59797670;59798998;59799641;59802016;59805223;59808046;59809378;59810571;59811515;59814866;59815546;59816271;59816658;59821560;59823081	59772859;59778815;59782343;59784880;59785812;59785942;59788637;59789261;59789525;59789937;59791879;59794504;59796920;59797756;59799148;59800716;59802196;59805375;59808165;59809504;59810640;59811566;59814954;59815723;59816387;59816839;59822110;59823147	-	5551	Zcchc6	protein-coding	-0.858679	6.51754	-23.4837	6.21e-14	9.66e-13	21.9067
29867	chr5	115168691;115172759;115173115;115175379;115176240;115180792;115186012	115169148;115172906;115173224;115175522;115176270;115180971;115186121	-	1181	Cabp1	protein-coding	2.18836	3.15536	22.8928	9.27e-14	1.34e-12	21.9023
20399	chr7	126466994;126467950;126468420;126468756;126469125;126471122;126471395;126471700;126472073;126474619	126467773;126468049;126468641;126468967;126469328;126471297;126471486;126471801;126473094;126475130	-	3422	Sh2b1	protein-coding	-1.4023	6.17207	-23.4007	6.56e-14	1.01e-12	21.8967
21933	chr14	69767472;69770781;69773377;69775086;69776072;69777721;69780504;69782232	69767791;69770877;69773487;69775194;69776268;69777815;69780573;69784411	+	3179	Tnfrsf10b	protein-coding	-1.19875	5.74344	-23.2946	7.05e-14	1.07e-12	21.8675
319159	chr13	21735096	21735407	+	312	Hist1h4j	protein-coding	1.18802	5.64842	23.2806	7.11e-14	1.08e-12	21.8662
72399	chr5	121660586;121662000;121663296;121665099;121672085;121675230;121678764;121679211;121679817;121682780;121684371;121685129	121660848;121662161;121663491;121665288;121672198;121675378;121678839;121679349;121679926;121682869;121684474;121687248	+	3713	Brap	protein-coding	-0.989649	6.59218	-23.427	6.45e-14	9.96e-13	21.8621
12162	chr2	172869686;172872872;172875215;172879326;172893448;172916467;172939655	172870286;172872982;172875291;172879523;172893596;172916659;172940293	-	1968	Bmp7	protein-coding	-1.73471	3.74695	-22.8861	9.31e-14	1.35e-12	21.8574
19347	chr7	109893780;109896243;109896947;109897904;109898508;109899044;109899724;109901060;109905170;109905696;109908331;109911915;109914721;109916211;109917385;109918594;109919262;109921194;109926827;109933613;109934693;109935482;109960074	109894815;109896411;109897070;109897986;109898689;109899162;109899869;109901181;109905298;109905780;109908415;109912067;109914852;109916304;109917535;109918828;109919477;109921511;109927014;109934270;109934802;109935553;109960422	-	4956	Dennd5a	protein-coding	-0.881219	7.08283	-23.4799	6.22e-14	9.66e-13	21.8573
319953	chr15	83483769;83489469;83492543;83496272;83497320;83498152;83499922;83502081;83505250;83505483;83506280;83510734	83484313;83489632;83492629;83496415;83497428;83498286;83500102;83502289;83505366;83505643;83506327;83510907	-	2074	Ttll1	protein-coding	-1.19797	4.73293	-23.0656	8.23e-14	1.22e-12	21.8448
381259	chr1	59100593;59105546;59106544;59107454;59108038;59108675;59109039;59109988;59114081;59115873;59117331;59117975;59119703;59119952	59101198;59105667;59106634;59107527;59108229;59108798;59109196;59110105;59114218;59115929;59117341;59118006;59119806;59120096	-	1972	Tmem237	protein-coding	1.47623	3.96438	22.9037	9.2e-14	1.33e-12	21.8358
381157	chr18	10325179;10449930;10458222;10458578;10469342;10474219;10476666;10498951;10499884;10500941;10503158;10509083;10510628;10511329;10515194;10522088;10523207;10529576;10532795;10537064;10538132;10541643;10542343;10544447;10544869;10547010;10547281;10553703;10554824;10555886;10557240;10558786;10560320	10325289;10450036;10458381;10458775;10469518;10474395;10476788;10499067;10500003;10501078;10503343;10509409;10510756;10511463;10515391;10522268;10523399;10529706;10533134;10537179;10538376;10542190;10542445;10544602;10545008;10547171;10547485;10553868;10555051;10556027;10557440;10558924;10562941	+	8421	Greb1l	protein-coding	-1.0999	5.27613	-23.1645	7.7e-14	1.15e-12	21.8354
71389	chr2	160946978;160956083;160957036;160959977;160961274;160961863;160965169;160967788;160969339;160970146;160977459;160979369;160981575;160982624;160983058;160983663;160984458;160988257;160990245;160992115;161008355;161013022;161014084;161017176;161018026;161019452;161020967;161025939;161026249;161029178;161029903;161030747;161039194;161041985;161052388;161059919;161108989	160950187;160956202;160957227;160960429;160961480;160962014;160966740;160967996;160969555;160970206;160977519;160979498;160981678;160982713;160983217;160983862;160984660;160988367;160990424;160992279;161008550;161013232;161014339;161017319;161018202;161019695;161021088;161026073;161026335;161029295;161029961;161030809;161039343;161042132;161052905;161059974;161109056	-	10549	Chd6	protein-coding	-0.89765	6.74726	-23.3919	6.6e-14	1.01e-12	21.822
269356	chr2	130684108;130684612;130684858;130685231;130685495;130685749;130686031;130686884;130687159;130687371;130687563;130687787;130687954;130690833;130691390;130691549;130692029;130692166;130696041;130696648;130697359	130684503;130684781;130685053;130685404;130685663;130685855;130686289;130686957;130687291;130687484;130687688;130687880;130688157;130690956;130691471;130691780;130692078;130692330;130696103;130696755;130697519	-	3201	Slc4a11	protein-coding	-1.39432	6.02074	-23.2686	7.17e-14	1.08e-12	21.8207
28036	chr3	127536714;127540545;127540799;127543032;127544154;127545826;127546047;127546476;127546654;127546921;127547090;127547362;127553183	127537034;127540636;127540958;127543156;127544278;127545970;127546403;127546569;127546818;127547004;127547190;127547546;127553349	-	2121	Larp7	protein-coding	1.04743	6.49075	23.3436	6.82e-14	1.04e-12	21.8117
22083	chr7	111028951;111030214;111033691;111034348;111035288;111038386;111040555;111042816;111043026;111043417;111043614;111043836;111045377;111046254;111046516;111046763;111049264;111049510;111050434;111050945;111051450;111052302;111053382;111053814;111055359	111029181;111030312;111033930;111034465;111035377;111038534;111040662;111042923;111043262;111043506;111043742;111044019;111045465;111046439;111046603;111046911;111049380;111049655;111050505;111051080;111051596;111052459;111053478;111053926;111056377	+	4300	Ctr9	protein-coding	-0.960283	8.06958	-23.4948	6.16e-14	9.61e-13	21.8069
105559	chr14	120275669;120324794;120379150;120385391;120388900;120395712;120396451;120404638;120428935	120275905;120325412;120379314;120385591;120389163;120395765;120396604;120404732;120431698	+	4553	Mbnl2	protein-coding	-1.08552	6.45632	-23.3193	6.93e-14	1.05e-12	21.8011
272027	chr4	46114746;46119143;46119841;46120448;46124043;46124900;46129227;46131843;46135387;46138380	46117083;46119281;46119999;46120566;46124148;46125025;46129347;46132156;46135594;46138475	-	3726	Tstd2	protein-coding	-1.26991	4.74935	-23.0006	8.61e-14	1.26e-12	21.7985
666311	chr5	145283343;145286308;145287308;145288294;145290330	145283780;145286509;145287399;145288417;145291469	+	1996	Zscan25	protein-coding	-1.37531	5.10079	-23.0577	8.28e-14	1.22e-12	21.7927
66256	chr3	88579671;88580974;88583777;88586865;88587881	88580034;88581072;88583885;88586942;88588413	+	1183	Ssr2	protein-coding	0.815717	7.57891	23.436	6.41e-14	9.93e-13	21.7924
20603	chrX	157443954;157447355;157454834;157455994;157460327;157461176;157461961;157465824;157466398;157469988;157491905	157446176;157447470;157454913;157456108;157460416;157461330;157462136;157465888;157466491;157470108;157492046	-	3377	Sms	protein-coding	1.50811	5.27518	23.0704	8.21e-14	1.21e-12	21.7773
239530	chr15	73694607;73707321	73696562;73707505	-	2141	Gpr20	protein-coding	-2.46604	2.33067	-22.809	9.82e-14	1.41e-12	21.7766
78303	chr11	58948911	58949530	+	620	Hist3h2ba	protein-coding	2.05793	4.05373	22.8083	9.82e-14	1.41e-12	21.7756
76478	chr8	71251124;71253071;71254521;71255407;71255647;71256008;71256459;71257356;71263052;71269226;71272284	71251544;71253254;71254662;71255565;71255712;71256120;71256554;71257425;71263104;71269284;71272590	-	1670	Haus8	protein-coding	1.04607	5.57811	23.131	7.87e-14	1.17e-12	21.7663
268510	chr11	116918863;116923340;116931623;116944865;116945492;116946472;116947227;116948515;116966707;116968385;116973301;116974192;116977681;116978062;116978364;116983592;116984875;116985484	116919543;116923452;116931770;116944980;116945565;116946642;116947391;116948684;116966838;116968518;116973431;116974197;116977836;116978208;116978480;116983666;116985131;116986944	+	4254	Mgat5b	protein-coding	-1.47742	4.46622	-22.889	9.29e-14	1.34e-12	21.7649
12287	chr2	24606375;24607442;24607942;24609843;24610111;24616819;24617674;24618255;24622599;24625238;24631899;24635096;24637426;24638672;24639094;24642853;24648479;24648897;24649994;24650427;24651081;24652904;24654384;24656711;24657291;24658491;24658865;24661754;24677822;24678876;24685768;24687700;24690741;24697275;24697573;24699926;24702508;24706135;24718030;24719045;24719941;24721308;24730671;24732196;247…	24607100;24607686;24608146;24609959;24610246;24616946;24617786;24618362;24622707;24625334;24632026;24635240;24637517;24638737;24639210;24642858;24648562;24649007;24650158;24650628;24651218;24653064;24654480;24656722;24657397;24658550;24658994;24661880;24678039;24679643;24685874;24687767;24690858;24697347;24697704;24700038;24702620;24706344;24718119;24719101;24720056;24721411;24730861;24732348;247…	-	7290	Cacna1b	protein-coding	-2.26817	2.97961	-22.6912	1.07e-13	1.51e-12	21.7625
54446	chr8	107293470;107295581;107324639;107338295;107338809;107344786;107347667;107351427;107355515;107355770;107358634;107361744;107366179;107367049;107370418;107371158	107293898;107295634;107324764;107338356;107339367;107344978;107347857;107351599;107355649;107355822;107358766;107361824;107366327;107369551;107370659;107379517	+	13443	Nfat5	protein-coding	-1.10565	6.23439	-23.2281	7.37e-14	1.11e-12	21.76
56195	chr3	119718742;119720607;119720789;119724094;119724612;119726066;119740315;119747592;119747790;119751864;119752944;119761703;119781504;119783202	119720460;119720684;119721005;119724186;119724645;119726205;119740510;119747702;119747954;119752007;119753116;119761778;119781534;119783388	-	3364	Ptbp2	protein-coding	-1.31845	5.02493	-22.9995	8.61e-14	1.26e-12	21.76
94352	chr14	69609476;69633884;69644696;69660639;69663900;69667267;69673382;69675676;69677813;69682095;69689028;69690134;69692314;69693040	69609566;69634290;69644871;69660850;69664122;69667450;69673533;69675843;69677975;69682338;69689143;69690270;69692425;69695834	+	5180	Loxl2	protein-coding	2.71631	3.2834	22.6808	1.07e-13	1.51e-12	21.7567
56296	chr4	107676290;107679253;107680646;107683580	107677069;107679475;107680854;107684162	-	1795	Dmrtb1	protein-coding	-2.3358	2.64166	-22.7041	1.06e-13	1.5e-12	21.751
19652	chrX	8138975;8142356;8143247;8143658;8143848;8144573;8144955;8145638	8141208;8142955;8143332;8143751;8143947;8144679;8145072;8145802	-	3504	Rbm3	protein-coding	0.920355	7.31473	23.3441	6.82e-14	1.04e-12	21.7444
14155	chr9	62791824;62811058	62797728;62811648	-	6496	Fem1b	protein-coding	-0.944287	9.15084	-23.4804	6.22e-14	9.66e-13	21.7401
16880	chr15	7129572;7130901;7140542;7154387;7157156;7159391;7164529;7166883;7169012;7172856;7173391;7175560;7177432;7177904;7178799;7181853;7184717;7185067;7185566;7186866;7188075;7190115;7190546	7129826;7131038;7140583;7154547;7157267;7159521;7164692;7167057;7169266;7172985;7173560;7175705;7177594;7177974;7179012;7182032;7184818;7185343;7185733;7187027;7188168;7190193;7197489	+	10333	Lifr	protein-coding	0.875606	7.49351	23.3454	6.81e-14	1.04e-12	21.7338
17859	chr19	53310506;53329413;53330446;53331351;53346451;53369542;53370190;53371573	53310973;53329720;53330600;53331483;53346480;53369656;53370361;53375810	+	5619	Mxi1	protein-coding	1.20379	5.48022	23.0595	8.27e-14	1.22e-12	21.7321
110542	chr15	102445367;102445805;102446264;102446708;102447000;102447231;102452149;102452387;102452745;102453032;102454213	102445522;102445987;102446455;102446779;102447112;102447461;102452263;102452559;102452892;102453168;102454639	+	1947	Amhr2	protein-coding	2.87957	2.65876	22.6938	1.06e-13	1.51e-12	21.7319
69217	chr7	45526330;45530569;45532258;45534338;45534507;45534744;45537657;45538198;45539206;45540480;45540831;45541055;45543946;45547950;45549060;45549230;45549804;45553245;45553569;45553765	45526441;45530658;45532365;45534410;45534607;45534853;45537872;45538477;45539289;45540527;45540911;45541204;45544044;45548090;45549159;45549306;45549965;45553294;45553681;45554229	+	2660	Plekha4	protein-coding	2.55161	2.58795	22.679	1.07e-13	1.51e-12	21.7263
353283	chrX	7924276;7928469	7925213;7928607	-	1077	Eras	protein-coding	2.32693	3.21121	22.6193	1.12e-13	1.57e-12	21.7132
69719	chr5	31054811;31055243;31058069;31058677;31058981;31059433;31059779;31060099;31060481;31060828;31061117;31061457;31061778;31062201;31062462;31066688;31066981;31067400;31068106;31068363;31068674;31069015;31069519;31070295;31070568;31071865;31072302;31072557;31072818;31073142;31073491;31073998;31074270;31074594;31075089;31075809;31075955;31076218;31076674;31077093;31077351;31077595;31077889;31078093	31055036;31055382;31058198;31058819;31059122;31059604;31059964;31060211;31060626;31060959;31061350;31061678;31061966;31062325;31062592;31066800;31067225;31067646;31068204;31068587;31068856;31069233;31069686;31070477;31070672;31072104;31072383;31072723;31072982;31073273;31073692;31074188;31074410;31074695;31075185;31075853;31076124;31076292;31076886;31077218;31077506;31077696;31077983;31078479	+	7106	Cad	protein-coding	-1.31034	8.81752	-23.4113	6.51e-14	1e-12	21.7097
13680	chr8	110974991;110976429;110976968;110978468;110979036;110980553;110980991;110983581;110989474;110990477;110993057;110997667	110976090;110976620;110977130;110978705;110979213;110980667;110981093;110983673;110989609;110990527;110993105;110997823	-	2575	Ddx19a	protein-coding	1.04962	5.92425	23.0972	8.06e-14	1.2e-12	21.6986
234549	chr8	88137885;88138275;88139892;88141672;88144529;88147547;88150092;88156462;88156670;88157053;88158129;88161878;88164888;88166996;88170859	88138157;88138447;88139979;88141781;88144638;88147687;88150369;88156552;88156827;88157135;88158265;88161966;88165031;88167172;88171952	+	3146	Heatr3	protein-coding	0.862443	7.10335	23.2559	7.23e-14	1.09e-12	21.6959
13628	chr2	181147692;181148598;181149676;181150919;181152784;181153651;181155263;181156724	181148106;181148832;181149932;181151069;181153080;181153830;181155481;181157015	-	2046	Eef1a2	protein-coding	-3.64398	1.69967	-23.1062	8.01e-14	1.19e-12	21.6908
17309	chr15	80173721;80210973	80173838;80215519	+	4665	Mgat3	protein-coding	1.73114	3.95411	22.6851	1.07e-13	1.51e-12	21.6894
224826	chr17	46928291;46932453;46934075;46935434;46938650;46939302;46941004;46942720;46943337;46944508;46944791;46945046;46946018;46948573;46951882;46953898;46954870;46955782;46956558;46957114;46957305;46959464;46961499;46963147;46963688;46964757;46966141;46967032;46967190;46968384;46969191;46970101;46972864;46973917;46975740;46975927;46980320;46980489;46981354;46982266;46983221;46985989;46986645;46988653;469…	46930500;46932554;46934245;46935511;46938706;46939410;46941134;46942810;46943472;46944575;46944887;46945101;46946166;46948651;46951985;46954059;46954963;46955981;46956736;46957194;46957414;46959566;46961653;46963195;46963790;46964809;46966265;46967095;46967312;46968449;46969301;46970162;46973047;46974045;46975839;46976090;46980418;46980587;46981442;46982373;46983341;46986051;46986783;46988783;469…	-	7748	Ubr2	protein-coding	-0.906949	6.5962	-23.163	7.71e-14	1.15e-12	21.6734
20908	chr19	11775118;11777088;11777487;11781567;11782800;11783026;11785390;11785685;11786525;11788169;11789557;11790048;11791746;11803494;11818692	11776588;11777170;11779173;11781680;11782910;11783136;11785524;11785758;11786633;11788236;11789631;11790093;11791845;11803577;11819403	-	4980	Stx3	protein-coding	-1.21974	5.45446	-22.9572	8.87e-14	1.29e-12	21.6667
103466	chr10	86779005;86804781;86811530;86812325;86815854;86816953;86820207;86820668;86820910;86823064;86824187;86825155;86831700;86833931	86779311;86804965;86811604;86812380;86815944;86817090;86820267;86820770;86821011;86823145;86824273;86825295;86831764;86838389	+	5952	Nt5dc3	protein-coding	-1.23861	5.08596	-22.88	9.35e-14	1.35e-12	21.664
326622	chr2	5951469;5957471;5960933;5973469;5975908;5979774;5982992;5988387;6003545;6010315;6018902;6023283;6026115;6027213;6029362;6034112;6040109;6040463;6046898;6050338;6051509;6055433	5951553;5957850;5961712;5973629;5976102;5979923;5983095;5988472;6003653;6010428;6019018;6023468;6026318;6027488;6029545;6034251;6040210;6040561;6047065;6050479;6051629;6056703	+	5174	Upf2	protein-coding	-0.913631	7.00293	-23.1735	7.65e-14	1.15e-12	21.6469
654824	chr8	45996908;45997614;45998397;45999251;45999617	45997125;45997820;45998488;45999403;45999850	-	904	Ankrd37	protein-coding	2.48831	3.17177	22.5029	1.21e-13	1.68e-12	21.6335
67041	chr15	4026428;4035260;4037091;4047465;4053715;4057669;4059936;4091168;4092411;4094015;4096472;4101127;4101804;4128834;4142792;4147565;4153728	4026849;4035368;4037181;4047600;4053864;4057775;4059996;4091275;4092525;4094109;4096520;4101199;4101879;4128923;4142872;4147666;4155344	+	3482	Oxct1	protein-coding	1.25555	5.64728	22.9477	8.92e-14	1.3e-12	21.6316
30933	chr2	32757234;32758671;32759527;32760589;32761496	32757450;32758936;32759702;32760716;32762244	+	1536	Tor2a	protein-coding	-1.17731	5.81634	-22.976	8.75e-14	1.28e-12	21.6315
80911	chr5	35583060;35583876;35588159;35588619;35589176;35589694;35592076;35594310;35598315;35599692;35601503;35602921;35604614;35605207;35607082;35608258;35609020;35609736;35612015	35583134;35583975;35588313;35588852;35589250;35589783;35592219;35594398;35598411;35599874;35601625;35603041;35604736;35605320;35607197;35608432;35609087;35609822;35613801	+	3956	Acox3	protein-coding	-1.27233	4.69792	-22.7447	1.03e-13	1.46e-12	21.6235
56323	chr4	42953094;42956526;42957318	42953385;42957127;42958732	+	2309	Dnajb5	protein-coding	-1.75502	5.02944	-22.7661	1.01e-13	1.44e-12	21.609
50877	chr7	99811439;99823322;99828158	99814307;99823533;99828417	-	3341	Neu3	protein-coding	-1.46141	4.15168	-22.5989	1.14e-13	1.58e-12	21.5994
231440	chr5	91517700;91593818;91612998;91622933	91517957;91594501;91613076;91624011	+	2100	Parm1	protein-coding	-1.68094	3.64318	-22.4881	1.23e-13	1.69e-12	21.5853
17128	chr18	73639013;73641783;73648885;73649726;73657195;73658568;73658779;73662658;73675161;73675771;73677663;73703430	73640469;73641921;73649053;73649909;73657245;73658684;73658898;73662867;73675190;73675945;73678039;73703741	-	3341	Smad4	protein-coding	-0.867924	6.90926	-23.0725	8.19e-14	1.21e-12	21.5815
72552	chr8	119561978;119565644;119566029;119567766;119575092	119564137;119565871;119566474;119567991;119575200	-	3169	Hsdl1	protein-coding	-1.04717	5.66608	-22.8781	9.36e-14	1.35e-12	21.5771
14182	chr8	25518772;25532250;25555508;25557731;25558071;25560720;25562138;25564340;25566711;25568188;25569639;25570141;25570710;25572338;25572719;25573123;25573546;25573745	25519429;25532428;25555774;25557820;25558243;25560843;25562328;25564484;25566913;25568333;25569760;25570251;25570900;25572460;25572789;25573260;25573651;25575714	+	5008	Fgfr1	protein-coding	-1.14823	6.81277	-23.0391	8.38e-14	1.23e-12	21.5702
245474	chrX	75095854;75096834;75097283;75098462;75098763;75100030;75100433;75100990;75102422;75104340;75105654;75106278;75107172;75108179;75108696	75096127;75096901;75097369;75098553;75098947;75100094;75100559;75101120;75102565;75104460;75105772;75106381;75107250;75108304;75109776	+	2803	Dkc1	protein-coding	0.803901	6.89565	23.0582	8.28e-14	1.22e-12	21.5699
21411	chr15	82808622;82814481;82815611;82825231;82851513;82911986	82809787;82814603;82815660;82825324;82857284;82912134	-	7354	Tcf20	protein-coding	-0.80135	8.93926	-23.2219	7.4e-14	1.11e-12	21.5672
21685	chr15	81802673;81811414;81814944;81821199;81823466	81802886;81811720;81815261;81821419;81826863	+	4458	Tef	protein-coding	-1.03473	6.46111	-22.9825	8.71e-14	1.27e-12	21.56
22646	chr9	122923078;122925008;122926310;122929600	122923218;122925296;122926454;122931028	+	2004	Zfp105	protein-coding	-1.45867	4.00821	-22.4946	1.22e-13	1.69e-12	21.5428
665113	chr3	28263214;28358991;28493967;28505753;28532888;28539414;28541968;28554928;28557039;28564075;28570867;28577369;28594022;28594907;28596072;28604176;28607138;28611863;28620935;28623011;28625199;28630431;28638388;28646597;28649143;28650027;28651783;28654167;28661687;28663919;28665680;28666089;28667899	28263699;28359056;28494023;28505878;28532998;28539504;28542098;28554982;28557117;28564250;28570933;28577573;28594132;28594993;28596260;28604340;28607377;28611969;28621098;28623108;28625222;28630615;28638517;28646761;28649254;28650197;28651926;28654301;28661787;28664068;28665839;28666449;28670585	+	7336	Tnik	protein-coding	2.10268	2.91195	22.3689	1.33e-13	1.82e-12	21.5399
12831	chr2	27886425;27922017;27928042;27929379;27949627;27950627;27951287;27952273;27952969;27958222;27958485;27960387;27962062;27964068;27965251;27965597;27966930;27968139;27969745;27971447;27973148;27973868;27974444;27974693;27975555;27980472;27981037;27985049;27986721;27989139;27990038;27991994;27995706;27995861;27996869;27997563;27998726;28001570;28002483;28003861;28004042;28005179;28007748;28009108;280…	27886924;27922184;27928255;27929541;27949758;27950758;27951526;27952446;27953025;27958263;27958547;27960461;27962154;27964124;27965304;27965650;27966983;27968192;27969798;27971491;27973201;27973912;27974497;27974737;27975608;27980516;27981090;27985093;27986774;27989246;27990091;27992047;27995750;27995914;27996913;27997616;27998779;28001623;28002590;28003950;28004095;28005286;28007855;28009161;280…	+	8402	Col5a1	protein-coding	-1.25096	5.75065	-22.827	9.7e-14	1.39e-12	21.5351
22630	chr12	21390329;21394965;21396282;21398241;21416798	21391415;21395060;21396445;21398364;21417436	-	2110	Ywhaq	protein-coding	0.970582	7.10361	23.0242	8.47e-14	1.24e-12	21.5317
101565	chr7	118712611;118714106;118715360;118717967;118721394;118724455;118725303;118726003;118726500;118729623;118729958;118730668;118731697;118732394;118732887;118735268	118712748;118714248;118715514;118718095;118723038;118724585;118725459;118726142;118726616;118729724;118730074;118730741;118731759;118732453;118732972;118737019	+	5009	Ccp110	protein-coding	-0.982536	7.07255	-22.9996	8.61e-14	1.26e-12	21.5182
17937	chr10	127660918;127662731;127663132;127663350;127663740;127664265;127666376	127661779;127662922;127663264;127663401;127663873;127665138;127666703	-	2575	Nab2	protein-coding	1.45721	4.58101	22.5646	1.16e-13	1.62e-12	21.5123
14635	chr11	116008357;116008803;116009048;116009921;116010241;116010563;116011027;116012514	116008714;116008965;116009198;116010102;116010376;116010682;116011216;116012719	-	1506	Galk1	protein-coding	0.837764	7.24596	23.0084	8.56e-14	1.26e-12	21.5093
110391	chr5	45434032;45437843;45439285;45443437;45444647;45447576;45450007	45434678;45437926;45439393;45443577;45444743;45447668;45450229	-	1394	Qdpr	protein-coding	1.75394	3.95835	22.4311	1.28e-13	1.75e-12	21.5085
16400	chr11	95044482;95046449;95046921;95051452;95052444;95053225;95053732;95054075;95055696;95055857;95056441;95056704;95057084;95057271;95057967;95058212;95059324;95059556;95059779;95061878;95062553;95063135;95065763;95068225;95068712;95076131	95045763;95046590;95047046;95051550;95052557;95053347;95053914;95054177;95055773;95055936;95056512;95056851;95057181;95057420;95058103;95058279;95059410;95059692;95059867;95062074;95062763;95063221;95066012;95068304;95068839;95076714	-	4853	Itga3	protein-coding	-0.932613	6.92813	-22.9645	8.82e-14	1.28e-12	21.5035
26365	chr7	25461702;25464849;25465468;25466317;25471798;25473798;25474520;25476344;25477471	25463900;25464880;25465520;25466437;25472073;25474052;25474804;25476703;25477625	-	3736	Ceacam1	protein-coding	2.17617	2.84368	22.3104	1.39e-13	1.87e-12	21.4973
108800	chr12	91633009;91641721;91647232;91713927;91740471;91743606;91786127	91639805;91641923;91649070;91714124;91740746;91743878;91786436	-	9896	Ston2	protein-coding	-1.16163	5.30387	-22.6894	1.07e-13	1.51e-12	21.4939
20379	chr13	19623175;19625028;19625194;19627106;19630066;19632179	19623877;19625108;19625259;19627304;19630129;19632825	+	1760	Sfrp4	protein-coding	3.63449	1.6547	22.7993	9.88e-14	1.42e-12	21.4919
56279	chr2	26628457;26632604;26634788;26634987;26635539	26628699;26632738;26634895;26635163;26636497	+	1622	Fam69b	protein-coding	1.63483	4.19153	22.4542	1.26e-13	1.73e-12	21.4914
69186	chr11	69838525;69838920;69839188;69839366	69838649;69838951;69839268;69839558	+	431	Tmem256	protein-coding	1.14786	5.05142	22.6246	1.12e-13	1.56e-12	21.4794
67887	chr8	34154563;34161195;34165141;34167719;34168457;34170096	34154836;34161373;34165540;34167857;34168611;34170847	+	1899	Saraf	protein-coding	-1.12057	5.97845	-22.7928	9.93e-14	1.42e-12	21.4784
24131	chr14	34526699;34536565;34541868;34542427;34543973;34552177;34555343;34561253;34566857;34567398;34569713;34571718;34572990;34576986;34578595;34579176;34588377	34529549;34536680;34541988;34542607;34544417;34552322;34555528;34561881;34566893;34567567;34569727;34571921;34573012;34577344;34578670;34579327;34588681	-	6016	Ldb3	protein-coding	-1.90121	3.37147	-22.2963	1.4e-13	1.89e-12	21.475
19245	chr15	73723145;73724930;73748026;73751129;73753756;73755294;73756028;73756797	73723515;73725569;73748465;73752027;73753848;73755424;73756102;73758766	+	4619	Ptp4a3	protein-coding	-1.47708	6.71757	-22.8828	9.33e-14	1.35e-12	21.4738
18150	chr19	45747734;45748164;45748546;45748750;45749057;45749439	45748051;45748280;45748639;45748869;45749142;45749563	-	860	Npm3	protein-coding	1.12684	6.23856	22.8283	9.69e-14	1.39e-12	21.4716
442834	chr4	123403601	123411911	-	8311	D830031N03Rik	protein-coding	-1.26854	5.78454	-22.744	1.03e-13	1.46e-12	21.4713
70461	chr7	80586632;80590362;80592516;80592678;80595610;80598747;80604351;80605748;80609897;80616465;80618594;80620522;80629620;80677346;80688607	80589951;80590464;80592596;80592878;80595908;80598964;80604400;80605833;80609932;80616565;80618656;80620583;80629739;80677444;80688877	-	5110	Crtc3	protein-coding	-2.01805	3.25242	-22.2732	1.43e-13	1.91e-12	21.4671
232969	chr7	24507087;24510546;24515076	24507436;24510753;24515682	+	1165	Zfp428	protein-coding	1.13014	5.99229	22.7655	1.01e-13	1.44e-12	21.4543
665119	chr16	5147109;5147745;5165589;5167005;5167875;5168824;5171861;5172977;5176049;5176227;5176474;5178494;5180216;5180670;5182005;5183639	5147129;5147848;5165738;5167136;5168003;5169016;5171973;5173166;5176137;5176297;5176645;5178628;5180350;5180897;5182183;5183934	+	2337	Sec14l5	protein-coding	-2.18907	2.89732	-22.2452	1.45e-13	1.95e-12	21.4522
73212	chr5	139359739;139361307;139363973;139455417;139460469	139360730;139361388;139364163;139455546;139460534	-	1461	3110082I17Rik	protein-coding	1.24944	4.57731	22.4604	1.25e-13	1.72e-12	21.4318
52502	chr16	8658587;8663587;8664255;8672113	8661103;8663709;8664422;8672153	-	2849	Carhsp1	protein-coding	-0.929326	6.80459	-22.8381	9.62e-14	1.39e-12	21.4227
625098	chr12	73286848;73288393;73292160;73310145;73318977;73329980;73337022;73337510;73341408;73341707;73343669;73344793;73350514;73351751;73352079;73352457	73287032;73288523;73292233;73310197;73319016;73330058;73337104;73337568;73341473;73341760;73343748;73344893;73350638;73351895;73352173;73354045	+	2959	Slc38a6	protein-coding	-1.46165	3.87909	-22.3044	1.4e-13	1.88e-12	21.4219
244859	chr9	49415222;49418043;49418661;49419366;49419991;49420325;49421667;49426771	49416847;49418079;49418779;49419521;49420040;49420476;49421961;49427021	-	2686	Ankk1	protein-coding	-3.08997	2.4246	-22.3066	1.39e-13	1.88e-12	21.4204
14367	chr1	64730558;64737133	64736853;64737750	-	6914	Fzd5	protein-coding	1.00133	6.21072	22.7549	1.02e-13	1.45e-12	21.4191
66065	chr7	45554928;45556055;45556313;45557608;45559381;45562915;45565955;45566120;45566647	45555066;45556093;45556395;45557674;45559472;45563019;45566022;45566216;45567321	+	1365	Hsd17b14	protein-coding	2.07085	4.16963	22.2973	1.4e-13	1.89e-12	21.3962
77975	chr16	91574508;91577974;91580202;91581695;91583276;91586942;91597582	91576158;91578031;91580294;91581762;91583388;91587081;91597680	-	2222	Tmem50b	protein-coding	1.79604	3.59123	22.2152	1.49e-13	1.99e-12	21.3944
13653	chr18	34861207;34862465	34861786;34864956	+	3072	Egr1	protein-coding	3.20989	3.55644	22.1534	1.55e-13	2.06e-12	21.3845
226178	chr19	46599106;46606712;46623401;46644353;46652474;46653965	46599293;46606759;46623579;46644455;46652635;46657389	+	4105	Wbp1l	protein-coding	-0.940833	6.73809	-22.7746	1.01e-13	1.44e-12	21.3826
76900	chr8	70597490;70598013;70598206;70598539;70598702;70598854;70598993;70599118;70599374;70599525;70599688;70599840;70600396;70602232;70602401;70602574;70608125	70597768;70598120;70598234;70598617;70598772;70598908;70599028;70599163;70599444;70599595;70599757;70599899;70600485;70602316;70602462;70602646;70608314	-	1475	Ssbp4	protein-coding	1.12957	6.068	22.6735	1.08e-13	1.52e-12	21.3789
66096	chr5	138255482;138256253;138258655;138259040	138255803;138256333;138258772;138259395	+	877	Lamtor4	protein-coding	1.45607	4.80201	22.4173	1.29e-13	1.77e-12	21.3743
442847	chr10	84547417;84549220;84552648;84553260	84548197;84549630;84552710;84553338	-	1334	Platr7	ncRNA	2.16671	3.141	22.118	1.59e-13	2.1e-12	21.3611
11370	chr11	70010192;70010525;70010698;70010849;70011006;70011168;70011345;70011536;70011684;70012186;70012448;70012958;70013172;70013434;70014245;70014479;70014631;70014793;70015117;70015263	70010436;70010600;70010770;70010921;70011078;70011265;70011446;70011598;70011770;70012290;70012646;70013083;70013301;70013578;70014379;70014543;70014703;70014858;70015195;70015407	-	2158	Acadvl	protein-coding	-0.949433	6.56434	-22.7195	1.04e-13	1.48e-12	21.3587
107373	chr19	12573525;12577090;12583923;12586835	12573580;12577170;12584122;12589696	+	3199	Fam111a	protein-coding	1.02799	6.01718	22.6361	1.11e-13	1.55e-12	21.3557
12268	chr17	34728380;34728765;34729182;34729400;34729576;34729804;34730420;34730624;34730809;34731076;34732170;34732724;34732973;34733400;34733660;34733872;34734132;34734366;34734701;34734877;34735404;34735736;34736065;34736240;34736447;34736895;34737633;34738843;34739655;34739936;34740267;34740529;34740962;34741170;34741791;34741988;34742364;34742532;34742811;34743469;34743762	34728627;34728897;34729265;34729498;34729665;34729906;34730494;34730714;34730989;34731169;34732229;34732891;34733205;34733571;34733776;34734028;34734207;34734575;34734790;34734928;34735607;34735875;34736135;34736354;34736641;34736969;34737759;34739001;34739840;34740121;34740443;34740644;34741094;34741275;34741887;34742070;34742452;34742602;34743012;34743661;34743897	-	5394	C4b	protein-coding	-1.91405	3.18649	-22.0822	1.63e-13	2.15e-12	21.3326
76890	chr17	74200700;74202261;74217027;74225432;74241905;74244975;74255228;74258424;74294692	74201325;74202365;74217103;74225574;74242016;74245087;74255296;74258505;74294863	-	1499	Memo1	protein-coding	1.3375	4.65865	22.3336	1.37e-13	1.85e-12	21.3307
76088	chr19	24999529;25051487;25061108;25065388;25078080;25079759;25086180;25087670;25089891;25094339;25095486;25097412;25099593;25100852;25119412;25121114;25122386;25123140;25127068;25127476;25130351;25132064;25137317;25140069;25147295;25149783;25154145;25155884;25158353;25161016;25162941;25163448;25164321;25169403;25171501;25172457;25174174;25175360;25176828;25181562;25182961;25183489;25184851;25188337;251…	24999703;25051589;25061283;25065459;25078203;25079974;25086265;25087736;25090040;25094419;25095645;25097548;25099686;25101014;25119529;25121184;25122524;25123241;25127163;25127710;25130515;25132236;25137412;25140164;25147444;25149896;25154300;25156023;25158522;25161155;25163123;25163577;25164408;25169499;25171635;25172609;25174332;25175460;25177020;25181705;25183092;25183623;25184940;25188573;251…	+	7810	Dock8	protein-coding	-3.06501	2.70415	-22.1157	1.59e-13	2.11e-12	21.3295
27878	chr1	166379167;166382127;166382397;166386666;166388562;166389836;166391823;166392568	166379476;166382218;166382462;166386763;166388771;166389987;166391985;166393621	+	2145	Tada1	protein-coding	-2.64803	2.38757	-22.1362	1.57e-13	2.08e-12	21.3244
12493	chr7	45233632;45234684;45235407;45236115;45237002;45237160;45238500;45238660	45233978;45234767;45235643;45236219;45237076;45237284;45238572;45238839	-	1226	Cd37	protein-coding	2.59646	3.06946	22.0546	1.67e-13	2.17e-12	21.3189
16469	chr15	74702412;74709247	74707864;74709322	-	5529	Jrk	protein-coding	-1.19734	4.68938	-22.3222	1.38e-13	1.87e-12	21.3172
60409	chr9	44403759;44404334;44405243;44406804;44407127	44404098;44404460;44405346;44406978;44407548	-	1168	Trappc4	protein-coding	1.2937	4.90899	22.3665	1.34e-13	1.82e-12	21.3168
56739	chr14	55618166;55618546;55618742;55618898;55619121;55619580;55621235;55622215;55622427;55622645;55622794;55623164;55623497;55623921;55624076;55624349;55624723;55624885;55625073;55625276	55618353;55618658;55618810;55619040;55619196;55619700;55621319;55622294;55622562;55622717;55622885;55623213;55623634;55623987;55624242;55624397;55624786;55625001;55625179;55625395	+	2055	Rec8	protein-coding	-1.44352	5.21203	-22.4055	1.3e-13	1.78e-12	21.3102
52670	chr11	113698171;113699836;113702056;113702413;113703271;113706417;113708804;113709228;113709822	113698666;113699982;113702095;113702509;113703366;113706569;113708854;113709526;113710017	-	1575	Cpsf4l	protein-coding	1.64535	3.71722	22.1111	1.6e-13	2.11e-12	21.3025
235406	chr9	56917200;56925313	56918704;56928371	-	4564	Snx33	protein-coding	-1.96017	3.4373	-22.0578	1.66e-13	2.17e-12	21.3011
68236	chr2	163087031;163089539	163087847;163089601	-	880	Gtsf1l	protein-coding	2.56759	2.86911	22.0297	1.69e-13	2.21e-12	21.2977
69470	chr2	127247975;127248492;127256005;127256957	127248084;127248809;127256169;127260764	+	4401	Tmem127	protein-coding	-0.975376	5.98926	-22.5445	1.18e-13	1.64e-12	21.2939
83436	chr8	25039144;25043625;25052360;25057294;25057733;25059134;25059834;25062375;25063938;25071999;25088342;25101660	25043038;25043702;25052423;25057364;25057801;25059280;25059974;25062472;25063986;25072055;25088505;25101811	-	4985	Plekha2	protein-coding	0.902617	6.40817	22.6083	1.13e-13	1.57e-12	21.2902
227634	chr2	25926838;25933591;25934220;25935462;25935850;25936515;25937946;25940865;25941378;25944426;25944942;25945134;25952678;25956247;25965663;25966686;25982782	25930025;25933709;25934335;25935561;25936058;25936651;25940313;25940949;25941469;25944603;25945038;25945273;25952819;25956327;25965824;25966948;25983282	-	7978	Camsap1	protein-coding	-1.0267	6.97454	-22.6688	1.08e-13	1.52e-12	21.2876
17196	chr18	82475123;82500727;82522050;82554320;82561778;82572825;82575172;82575601;82578936;82584112	82475394;82500802;82522137;82558703;82561855;82572926;82575207;82575633;82579058;82585637	+	6718	Mbp	protein-coding	-2.07977	3.31128	-21.9992	1.73e-13	2.24e-12	21.2696
218973	chr14	47240944;47243803;47244985;47245287;47245833;47247381;47247786;47247996;47250760;47251918;47256104;47258521;47261340;47263439;47265674;47266981;47268072;47268656;47270135;47272136;47272867;47273112;47273913;47274744;47276521	47241812;47243941;47245112;47245457;47245876;47247434;47247898;47248213;47250891;47252032;47256260;47258658;47261581;47263623;47265858;47267062;47268213;47268762;47270227;47272231;47272917;47273223;47274064;47274855;47276857	-	4174	Wdhd1	protein-coding	0.874151	7.32765	22.6778	1.07e-13	1.51e-12	21.2653
14793	chr6	124830176;124830503;124831362;124832146;124832566;124832985	124830273;124830650;124831488;124832439;124832669;124833701	+	1488	Cdca3	protein-coding	1.03775	6.97594	22.6163	1.12e-13	1.57e-12	21.2474
269593	chr4	136469761;136521341;136539125;136540356;136545238	136469850;136521443;136539216;136543518;136549318	+	7529	Luzp1	protein-coding	-0.932289	7.88289	-22.6854	1.07e-13	1.51e-12	21.2381
20336	chr6	33249150;33265940;33277187;33296733;33305285;33332211;33347783;33438380;33441951;33579982;33757967;33815674;33838975;33862061;33910488;33918401;33921378;33971914	33249238;33266129;33277381;33296917;33305394;33332454;33347957;33438525;33442039;33580078;33758186;33815810;33839130;33862239;33910629;33918579;33921537;33972943	+	3723	Exoc4	protein-coding	-0.862911	7.56385	-22.6557	1.09e-13	1.53e-12	21.235
329165	chr1	60409619;60434243;60437056;60438942;60443985;60447260;60448078;60450071;60453604;60470666;60476740	60409919;60434410;60437232;60438959;60444082;60447406;60448202;60450253;60453762;60470839;60481163	+	5974	Abi2	protein-coding	1.07184	5.95225	22.4541	1.26e-13	1.73e-12	21.2316
70377	chr10	75893398;75893619;75893770;75893967;75894432;75895039;75895247	75893517;75893684;75893843;75894060;75894627;75895129;75895941	+	1336	Derl3	protein-coding	1.62226	3.94331	22.0499	1.67e-13	2.18e-12	21.2301
224624	chr17	25882114;25884580;25885075;25890638;25891286;25919365;25919652	25883908;25884802;25885152;25890698;25891346;25919549;25919714	-	2466	Rab40c	protein-coding	-1.15114	5.6388	-22.3882	1.32e-13	1.8e-12	21.2284
12445	chr17	47505051;47578709;47593467;47594734;47597420;47598003;47598609	47505266;47578773;47593852;47594949;47597579;47598139;47599689	+	2261	Ccnd3	protein-coding	1.26721	7.29504	22.6188	1.12e-13	1.57e-12	21.2281
11906	chr8	108714644;108792202;108800195;108856722;108914522;108933532;108933809;108945102;108946317;108955382	108715330;108794969;108800691;108856953;108914629;108933665;108934009;108945204;108951770;108961636	+	16439	Zfhx3	protein-coding	-1.46206	4.55031	-22.1581	1.55e-13	2.06e-12	21.2258
276770	chr11	69916712;69917428;69917597;69917917;69919151;69919449;69920341;69920801;69921024;69921163;69921822	69917341;69917501;69917728;69918021;69919336;69919478;69920630;69920947;69921085;69921386;69921958	-	2017	Eif5a	protein-coding	0.697625	9.14969	22.7624	1.01e-13	1.45e-12	21.2255
54651	chrX	7372591	7375830	-	3240	Usp27x	protein-coding	-1.77614	3.92788	-22.0104	1.72e-13	2.23e-12	21.2129
234776	chr8	116943393;116952874;116954714;116956253	116943750;116952999;116954913;116960445	+	4877	Atmin	protein-coding	-1.10052	6.60416	-22.5119	1.21e-13	1.67e-12	21.2069
216810	chr11	60226714;60231101;60232898;60240570;60242708;60245062;60245636;60248931;60258856;60261055;60262649;60270318;60274924;60280199;60352757	60230241;60231137;60232957;60241893;60242825;60245185;60245684;60249064;60258972;60261213;60262783;60270467;60275002;60280283;60352905	-	6248	Tom1l2	protein-coding	-1.31747	5.16558	-22.2612	1.44e-13	1.93e-12	21.2068
66181	chr2	112261969;112262313	112262077;112262898	+	695	Nop10	protein-coding	1.15698	6.4626	22.4949	1.22e-13	1.69e-12	21.2066
13824	chr18	33796327;33798508;33798691;33801571;33802513;33810219;33824459;33825407;33828104;33828727;33832595;33854236;33859542;33861146;33874142;33874738;33876909;33878912;33880187;33886351;33891425;33921830;34005985;34006769	33797470;33798589;33798801;33801639;33802560;33810338;33824536;33825454;33828217;33828810;33832685;33854357;33859619;33861237;33874205;33874826;33876996;33879032;33880284;33886429;33891476;33921934;34006422;34007206	-	3853	Epb41l4a	protein-coding	0.9808	5.61263	22.3518	1.35e-13	1.83e-12	21.1981
434128	chr7	16944682	16948828	+	4147	Pnmal2	protein-coding	-2.4323	3.11512	-21.8815	1.88e-13	2.41e-12	21.1955
100039748	chr15	52459699;52469301;52477533	52459709;52469307;52478240	-	726	Gm10020	pseudo	1.34125	6.17762	22.4297	1.28e-13	1.75e-12	21.1936
52463	chr10	62804570;62813578;62814436;62816384;62818939;62819473;62822549;62832894;62833538;62838176;62864808;62878152	62813412;62813824;62814573;62816473;62819034;62819623;62822760;62832987;62833628;62840378;62864861;62880014	-	14082	Tet1	protein-coding	0.847893	8.0395	22.6102	1.13e-13	1.57e-12	21.1739
214230	chr2	118663577;118664783;118677246;118677723;118688797;118689734;118693227;118693867;118694294;118694515;118695207;118696407	118664023;118664866;118677301;118677828;118689005;118690390;118693724;118694000;118694420;118694640;118695341;118698020	+	4193	Pak6	protein-coding	-2.15078	2.91937	-21.848	1.93e-13	2.46e-12	21.1717
226089	chr19	29522282;29533165;29541256;29561985;29567220;29567485;29569342;29570746;29574732;29575854;29577583;29579765;29584175;29584467;29585781;29586540;29587708;29594799;29595271;29597747;29597990;29599832;29600818;29602273;29602592;29603861	29522666;29533272;29541335;29562092;29567362;29567621;29569433;29570834;29574876;29575902;29577735;29579968;29584213;29584577;29585870;29586700;29587846;29594915;29595999;29597905;29598126;29600118;29601009;29602450;29602780;29605921	+	6282	Ric1	protein-coding	-0.800799	6.86286	-22.4965	1.22e-13	1.69e-12	21.1676
78908	chr3	101377125;101377806;101425451;101427030;101431204;101435331;101439375;101450884;101455105;101457623;101459787	101377202;101378492;101425828;101427440;101431593;101435732;101439779;101451294;101455512;101458108;101463060	+	7330	Igsf3	protein-coding	-1.07848	6.0809	-22.3624	1.34e-13	1.82e-12	21.1521
16561	chr4	149176321;149181484;149181809;149182268;149184309;149186103;149187591;149187999;149189723;149191149;149192573;149198432;149199258;149202508;149204186;149206718;149207849;149210042;149213296;149213623;149214079;149214907;149220542;149222227;149223230;149225090;149226263;149233734;149245338;149245542;149246337;149247228;149247805;149251741;149253672;149257870;149262136;149262699;149263615;149266252…	149180810;149181602;149182001;149182417;149184430;149186174;149187830;149188144;149189784;149191282;149192687;149198537;149199342;149202574;149204294;149206773;149207967;149210132;149213458;149213752;149214164;149215025;149220790;149222364;149223408;149225238;149226356;149238483;149245410;149245722;149246420;149247334;149247884;149251816;149253751;149258003;149262278;149262777;149263690;149266317…	-	14849	Kif1b	protein-coding	-0.912072	7.25956	-22.5117	1.21e-13	1.67e-12	21.1502
17876	chr2	125086271;125087677;125087742;125095708;125095912;125097563;125097977;125098450;125098797;125100319;125108956;125109154;125109670;125110480;125113849;125114043;125115438;125116665;125123385	125086716;125087703;125089037;125095759;125096120;125097634;125098075;125098518;125098847;125100420;125109019;125109203;125109823;125110671;125113942;125114050;125115490;125116873;125123660	-	3523	Myef2	protein-coding	0.907673	6.72867	22.4494	1.26e-13	1.73e-12	21.144
12337	chr7	98121565;98125242;98125829;98126246;98128473;98129244;98131191;98131676;98132833;98135760;98151812;98161916;98178044	98124055;98125378;98125944;98126442;98128595;98129439;98131268;98131869;98133025;98135968;98151943;98162110;98178193	-	4411	Capn5	protein-coding	1.75291	4.29487	21.9876	1.75e-13	2.26e-12	21.1418
77032	chr4	21757382;21759370;21759623;21767050	21758475;21759529;21759793;21767211	-	1587	Tstd3	protein-coding	2.00086	3.73612	21.8749	1.89e-13	2.42e-12	21.1388
93681	chr13	21513221;21521786;21522224;21525138;21526419;21530945	21520962;21521909;21522315;21525306;21527021;21531114	-	8900	Zkscan8	protein-coding	-1.55887	4.42207	-22.0081	1.72e-13	2.23e-12	21.1368
12212	chrX	103356476;103366214;103373599;103387255;103387987;103389460	103356889;103366268;103373754;103387311;103388046;103396118	+	7401	Chic1	protein-coding	1.77563	4.70252	22.0546	1.67e-13	2.17e-12	21.1345
54632	chrX	8238668;8245060;8245284;8245552;8246336;8246532;8246727;8246869;8248979;8250396;8250569;8250880;8252172	8240830;8245101;8245472;8245655;8246419;8246634;8246780;8246921;8249057;8250486;8250638;8251037;8252406	-	3425	Ftsj1	protein-coding	1.11495	4.98543	22.1394	1.57e-13	2.08e-12	21.1341
14284	chr5	32136472;32146825;32150421;32152671	32136805;32147076;32150528;32157840	+	5864	Fosl2	protein-coding	-1.80818	3.91926	-21.8979	1.86e-13	2.39e-12	21.1328
75007	chr3	95282935;95287645;95291022;95291480;95292125;95292625;95293625;95294795;95295273;95295651	95283625;95288400;95291079;95291544;95292283;95292727;95293767;95294986;95295425;95296164	+	2834	Fam63a	protein-coding	0.92157	6.13889	22.3433	1.36e-13	1.84e-12	21.1255
13380	chr19	30545876;30547563;30548778;30549134	30547438;30547712;30548946;30549496	-	2245	Dkk1	protein-coding	-2.46477	2.92376	-21.778	2.03e-13	2.57e-12	21.1207
243911	chr7	30447766;30449837;30450378;30450802;30452681;30453054;30453412;30453636;30454014;30454238;30454509;30455172;30455465;30456420;30456798	30448454;30449902;30450478;30450900;30452900;30453154;30453544;30453763;30454162;30454343;30454659;30455332;30455614;30456569;30457515	-	3122	Kirrel2	protein-coding	3.81872	2.21314	21.9935	1.74e-13	2.25e-12	21.1203
15926	chr1	65158616;65161050;65161800;65165100;65166107;65168499;65170959;65175231;65178990;65186305	65159555;65161212;65161940;65165251;65166284;65168604;65171250;65175368;65179142;65186479	-	2438	Idh1	protein-coding	1.07072	7.47429	22.4899	1.23e-13	1.69e-12	21.1199
20844	chr2	14074112;14102401;14115817;14115978;14117389;14128546;14128979;14131024;14134353;14137487;14138136;14138956;14141702;14146219	14074336;14102485;14115892;14116073;14117535;14128636;14129171;14131118;14134441;14137574;14138190;14139109;14141877;14148338	+	3690	Stam	protein-coding	-1.00567	6.1992	-22.3138	1.39e-13	1.87e-12	21.1011
228966	chr2	178411206	178414472	-	3267	Ppp1r3d	protein-coding	-3.44945	1.53801	-22.1839	1.52e-13	2.02e-12	21.0916
18033	chr3	135584655;135589327;135590316;135590780;135591554;135593831;135594209;135594865;135601426;135603710;135605057;135606572;135608152;135612414;135613651;135613907;135615272;135618804;135626595;135655500;135659028;135662915;135667753;135669270;135691123	135585515;135589504;135590488;135590846;135591678;135593933;135594378;135595066;135601540;135603851;135605245;135606661;135608295;135612552;135613742;135614011;135615430;135618967;135626743;135655598;135659065;135662993;135667792;135669339;135691547	-	4118	Nfkb1	protein-coding	-0.904628	6.59411	-22.3454	1.36e-13	1.84e-12	21.0817
70967	chr16	90830859;90866255;90869566;90876039;90890530;90894578;90897364;90904104	90831432;90866451;90869689;90876191;90890673;90894655;90897453;90904885	+	2142	Eva1c	protein-coding	-3.63341	1.71158	-22.1212	1.59e-13	2.1e-12	21.0767
75788	chr5	144876495;144880625;144881618;144882507;144883569;144884583;144886362;144889699;144891315;144893161;144894474;144896490;144897983;144899147;144899365;144901177;144902540;144965501	144879456;144880709;144881819;144882627;144883706;144884761;144886476;144889802;144891513;144893307;144894558;144896731;144898058;144899212;144899498;144901285;144902578;144965830	-	5333	Smurf1	protein-coding	-0.977077	6.46898	-22.318	1.38e-13	1.87e-12	21.0751
56364	chrX	101404384;101405905;101407205;101408477;101409154;101409612;101410057;101411213;101411532;101411845;101412138;101412378;101413112;101413489;101413904;101414175;101414422;101414748;101414930;101415761;101416167;101416909;101417287;101418273;101419698;101420146;101420540	101405803;101406019;101407459;101408591;101409305;101409780;101410160;101411359;101411706;101411957;101412294;101412475;101413277;101413661;101414054;101414261;101414537;101414898;101415406;101415938;101416461;101416981;101417330;101418952;101419914;101420222;101420685	-	6051	Zmym3	protein-coding	0.964397	6.18764	22.2736	1.43e-13	1.91e-12	21.0694
69976	chr2	125859218;125878278;125887864;125893353;125896645;125929561;125931253;125946784;125975260;125983055	125859377;125878366;125887987;125893443;125896791;125929659;125931405;125946994;125975461;125984298	+	2520	Galk2	protein-coding	1.16039	4.70916	21.9796	1.76e-13	2.27e-12	21.0581
15361	chr17	27556574;27559533;27560916;27561461;27562438	27557066;27559703;27561011;27561511;27563672	+	2046	Hmga1	protein-coding	1.36737	5.55378	22.1356	1.57e-13	2.08e-12	21.0563
211347	chr11	35769495;35776086;35777567;35778576;35781584;35783448;35785408	35769947;35776438;35777820;35778752;35781707;35783573;35791285	+	7365	Pank3	protein-coding	1.32936	7.03992	22.3531	1.35e-13	1.83e-12	21.0537
217333	chr11	116105750;116106932;116107424;116107778;116108266;116109534	116106641;116107006;116107622;116108008;116108361;116110235	-	2195	Trim47	protein-coding	-1.49602	3.91637	-21.7828	2.02e-13	2.56e-12	21.0378
208727	chr1	91932734;91933656;91934602;91945900;91947418;91955290;91956042;91958355;91959411;91961453;91964780;91968353;91970943;91972700;91975439;91982029;91984378;91984661;91987545;91991483;91996057;92002155;92012669;92029955;92054901;92148256	91933386;91933797;91934686;91946033;91947536;91955387;91956161;91958442;91959466;91961560;91964826;91968458;91971076;91972886;91975693;91982252;91984573;91984777;91987657;91991614;91996178;92002275;92012819;92030196;92054972;92148393	-	3960	Hdac4	protein-coding	-1.25299	5.39052	-22.0727	1.64e-13	2.16e-12	21.0332
110749	chr16	93883901;93884466;93885359;93887122;93888042;93891500;93892114;93892732;93894737;93894895;93900023;93900925;93905006;93905905	93883975;93884621;93885491;93887239;93888145;93891596;93892198;93892825;93894806;93894986;93900185;93901356;93905097;93906106	+	1913	Chaf1b	protein-coding	1.06981	6.15508	22.2111	1.49e-13	1.99e-12	21.0289
207212	chr7	100869746;100876413;100876766;100877708;100878096;100878494;100878805;100879452;100879933;100880601;100881179;100881693;100882220;100882410;100882773;100883116;100883470;100883768;100885677;100890421;100928569	100873596;100876682;100876940;100877856;100878163;100878580;100879054;100879756;100880132;100880674;100881392;100881811;100882305;100882519;100882823;100883292;100883562;100883884;100885859;100890498;100932161	-	10250	Arhgef17	protein-coding	-1.15764	6.56292	-22.2255	1.48e-13	1.97e-12	21.0013
19891	chr4	132768360;132768680;132770546;132771841;132773827;132775017;132776248;132776653;132777790	132768466;132768786;132770647;132771954;132773901;132775133;132776355;132776747;132778746	+	1782	Rpa2	protein-coding	0.870812	7.45291	22.3191	1.38e-13	1.87e-12	20.9944
66310	chr17	74299474;74307720;74315902;74316044;74316220;74323761	74299824;74307862;74315949;74316211;74316433;74323944	-	1108	Dpy30	protein-coding	1.07065	6.54034	22.214	1.49e-13	1.99e-12	20.9905
74094	chr17	46257851;46259937;46260095;46261136;46261419;46262402;46263689;46264883;46271800;46282346;46282960	46259483;46260020;46260202;46261202;46261580;46262430;46263813;46264978;46271929;46282439;46283026	-	2595	Tjap1	protein-coding	-1.17908	6.36183	-22.1798	1.52e-13	2.03e-12	20.9885
666060	chr4	45184906;45229831;45243630;45244572;45249174;45256842;45261833;45268469;45269900;45271130;45273078;45273359;45274312;45275250;45278826;45283546	45184957;45229935;45243787;45244674;45249219;45256949;45261928;45268594;45270019;45271266;45273204;45273454;45274494;45275397;45279641;45285936	+	4812	Frmpd1	protein-coding	-2.38951	3.71672	-21.644	2.24e-13	2.81e-12	20.988
72640	chr3	88532395;88536073	88532848;88541394	+	5776	Mex3a	protein-coding	1.14362	5.44795	22.0223	1.7e-13	2.22e-12	20.981
15200	chr18	36504927;36506635;36507449;36512557;36515087;36515468	36506364;36506725;36507604;36512734;36515260;36515805	-	2375	Hbegf	protein-coding	1.26849	4.78974	21.8757	1.89e-13	2.42e-12	20.9719
214951	chr17	25834465;25835137;25835277;25835470;25835745;25835969;25836411;25836988	25835056;25835197;25835377;25835582;25835893;25836193;25836572;25837127	-	1543	Rhbdl1	protein-coding	-2.13269	3.05124	-21.5591	2.38e-13	2.95e-12	20.9622
16776	chr2	180176373;180176888;180177103;180177274;180177491;180177735;180178009;180178277;180178515;180178721;180179010;180179252;180179606;180179836;180180074;180180310;180180609;180180842;180181093;180181350;180181572;180182358;180182767;180182964;180183320;180183618;180184018;180184401;180185329;180185623;180185814;180186562;180186801;180187176;180187546;180187859;180188265;180188567;180189333;180190160…	180176764;180177007;180177193;180177407;180177644;180177899;180178204;180178422;180178629;180178891;180179140;180179528;180179754;180179958;180180236;180180443;180180762;180180978;180181269;180181498;180181751;180182468;180182869;180183105;180183474;180183734;180184214;180184571;180185440;180185733;180185965;180186711;180186981;180187276;180187760;180187939;180188392;180188680;180189563;180190243…	-	11388	Lama5	protein-coding	-1.29167	8.98395	-22.3828	1.32e-13	1.8e-12	20.9582
68307	chr3	30644507;30645218;30646253;30649905;30655637;30659054;30659901;30672141	30644852;30645348;30646313;30650952;30655810;30659192;30660097;30672431	+	2387	Lrriq4	protein-coding	2.6253	2.23035	21.6217	2.27e-13	2.84e-12	20.9525
72022	chr9	53771535;53797838;53801011;53806618;53808046;53809686;53810875;53816783	53771894;53798013;53801138;53806777;53808202;53809738;53811029;53818161	+	2568	Slc35f2	protein-coding	1.03178	5.64024	22.0082	1.72e-13	2.23e-12	20.9415
22785	chr2	122681239;122685998;122686951;122687864;122689399;122694395;122702030	122685333;122686132;122687056;122688068;122689552;122694541;122702663	-	5476	Slc30a4	protein-coding	-1.4926	4.25162	-21.7013	2.15e-13	2.7e-12	20.9313
234595	chr8	95835923;95840414;95841522;95842176;95843760;95844104;95844888;95845799;95846133;95848381;95852802;95853472	95837671;95840468;95841721;95842323;95843874;95844161;95844986;95845943;95846331;95848768;95852907;95853491	-	3282	Slc38a7	protein-coding	-0.957858	6.44745	-22.1119	1.6e-13	2.11e-12	20.9242
11416	chr3	63942336;63944566;63947569;63948072;63953814;63963416	63943416;63944781;63947686;63948256;63954004;63964733	-	3109	Slc33a1	protein-coding	-1.02983	5.59349	-21.963	1.78e-13	2.28e-12	20.917
15569	chr4	91250766;91254141;91260761;91263992;91281214;91308611;91371900;91375936;91399438;91399816	91253570;91254179;91260986;91264145;91281317;91308854;91372055;91376496;91399536;91399984	-	4557	Elavl2	protein-coding	1.63491	3.53247	21.5541	2.39e-13	2.96e-12	20.9137
27387	chr2	32721055;32724937;32727689;32737519;32741210;32744751;32745835;32747022;32749153;32750952;32751514;32752614;32752989;32754396	32721195;32725399;32727806;32737558;32741667;32744879;32746289;32747146;32749685;32751067;32751685;32752725;32753195;32755007	+	3681	Sh2d3c	protein-coding	-2.29626	3.54451	-21.5001	2.48e-13	3.06e-12	20.8946
70762	chr3	86786150;86788622;86791995;86793219;86793817;86798920;86799461;86805584;86806122;86813677;86815090;86816358;86824636;86830824;86831733;86836305;86905885;86919750	86787412;86788634;86792111;86793299;86793913;86799088;86799594;86805730;86806241;86813734;86815198;86816433;86824730;86830871;86831834;86836407;86906216;86920884	-	4199	Dclk2	protein-coding	1.32105	4.5517	21.7189	2.12e-13	2.67e-12	20.8918
210982	chr17	46798116;46806552;46807396;46808349;46809568;46811924;46813933;46824450;46829912;46830065;46830951	46801829;46806654;46807490;46808494;46809626;46812024;46814038;46826123;46829980;46830113;46831413	-	6579	Gltscr1l	protein-coding	1.00423	5.95552	21.987	1.75e-13	2.26e-12	20.8846
21682	chr5	72755723;72757363;72757604;72760343;72763564;72764124;72765512;72768705;72771147;72773831;72779421;72782003;72783718;72785917;72786738;72789140;72823456;72825044;72868394	72756379;72757520;72757722;72760407;72763780;72764295;72765586;72768838;72771226;72773885;72779486;72782175;72783758;72786045;72786819;72789244;72823641;72825130;72868448	-	2656	Tec	protein-coding	-1.44567	3.95766	-21.5848	2.33e-13	2.91e-12	20.8836
19335	chr1	33719896;33720419;33721608;33723786;33724934;33734702;33736800;33738288;33739253	33720173;33720584;33721699;33724005;33725019;33734858;33736882;33738380;33742564	+	4487	Rab23	protein-coding	-1.57449	6.02681	-21.9706	1.77e-13	2.27e-12	20.8827
21770	chr17	46682991;46684261;46684506;46684665;46685302;46685519;46686054;46686263;46686559;46687034;46687250;46687446;46687837;46700069;46704833	46684126;46684377;46684578;46684766;46685429;46685689;46686107;46686431;46686689;46687126;46687360;46687645;46688029;46700146;46705002	-	2926	Ppp2r5d	protein-coding	-0.902991	7.30853	-22.1277	1.58e-13	2.09e-12	20.8632
140559	chr1	172312407;172316151;172317355;172318037;172318554;172319293;172319584	172312593;172316528;172317816;172318444;172318967;172319423;172319837	+	2234	Igsf8	protein-coding	1.28101	4.67834	21.6995	2.15e-13	2.7e-12	20.8573
22339	chr17	46016993;46020991;46022277;46024065;46024444;46025347;46028351;46031291	46018879;46021122;46022348;46024094;46025163;46025543;46028399;46032377	-	4174	Vegfa	protein-coding	1.26287	5.33242	21.829	1.96e-13	2.49e-12	20.8563
229603	chr3	96104527;96108711;96136474;96140417;96141488;96144241;96144968;96150862;96151338;96151895;96152513;96153408;96154769	96104819;96108768;96136624;96140605;96141715;96144342;96145095;96150974;96151465;96152044;96152627;96153492;96161129	+	8101	Otud7b	protein-coding	-1.0802	6.85808	-22.0652	1.65e-13	2.16e-12	20.8535
14468	chr3	142594847;142598132;142598995;142600486;142603558;142604076;142606726;142608110;142610952;142611350;142618095	142594911;142598335;142599122;142600595;142603754;142604318;142607006;142608322;142611054;142611543;142619176	+	2820	Gbp2b	protein-coding	-1.90551	3.22221	-21.4232	2.63e-13	3.2e-12	20.8517
20287	chr7	141278338;141278618;141278833;141279016	141278521;141278722;141278934;141279131	-	507	Sct	protein-coding	-1.60797	4.30663	-21.5913	2.32e-13	2.89e-12	20.8455
70024	chr2	4990724;4992095;4992878;4993743;4994570;4995721;4997104;4998534;4998730;4999680;5000860;5001264;5004008;5004946;5006344;5007067;5007328;5008480;5010689;5012705	4991476;4992137;4993023;4993856;4994682;4995865;4997332;4998642;4998840;4999780;5001056;5001380;5004175;5005111;5006578;5007201;5007432;5008812;5010775;5012791	-	3494	Mcm10	protein-coding	0.751006	7.23041	22.0967	1.62e-13	2.13e-12	20.8431
22275	chr4	116990217;116991232;116991393;116991621;116992564;116992826;116993248;116993388;116993585;116994331	116990448;116991298;116991493;116991758;116992725;116993023;116993310;116993467;116993697;116994375	-	1199	Urod	protein-coding	0.963613	5.87665	21.8925	1.87e-13	2.39e-12	20.8229
56442	chr10	57515774;57519363;57519698;57522956;57523961;57524320;57525325;57527665;57532357	57517292;57519593;57519842;57523216;57524098;57524399;57525494;57527826;57532529	-	2879	Serinc1	protein-coding	-0.83357	6.81414	-22.0047	1.73e-13	2.24e-12	20.8081
20501	chr3	104638668;104649258;104650886;104652742;104655448	104638828;104649517;104651029;104653587;104658462	+	4426	Slc16a1	protein-coding	0.81767	7.82827	22.0867	1.63e-13	2.14e-12	20.7992
445007	chr11	115564444;115565154;115566601;115568363;115568679;115569702;115569999;115577930;115578164;115578489;115578790;115580504;115580730;115580921;115581742;115581939;115582877;115583326;115583721	115564562;115565247;115566763;115568433;115568722;115569771;115570120;115578064;115578286;115578620;115578896;115580587;115580795;115581072;115581859;115582039;115583028;115583427;115583924	+	2159	Nup85	protein-coding	0.832393	7.44861	22.0509	1.67e-13	2.18e-12	20.7951
14676	chr10	81502313;81507928;81509286;81511997;81512411;81514237;81523810	81503105;81508081;81509415;81512125;81512565;81514421;81524225	-	1962	Gna15	protein-coding	-1.42142	4.57736	-21.5722	2.36e-13	2.92e-12	20.7851
17761	chr10	20148920;20230784;20233369;20245270;20246598;20250370;20257184;20261835;20266736;20267123;20269360;20273280;20273779;20274246;20274602;20276176;20278125;20279996	20149080;20230882;20233446;20245433;20246715;20250480;20257297;20261983;20266851;20267376;20269588;20273454;20273880;20274296;20274659;20276275;20278345;20281590	+	3895	Map7	protein-coding	1.03962	5.78069	21.8204	1.97e-13	2.5e-12	20.7826
20133	chr7	102441695;102442987;102446550;102447801;102449195;102450036;102450901;102454496;102456471;102457152;102457560;102459389;102460291;102460630;102461607;102463646;102465718;102466878;102468295	102442043;102443075;102446727;102447901;102449254;102450075;102451063;102454637;102456554;102457313;102457639;102459590;102460440;102460851;102461683;102463781;102465813;102467066;102469771	+	3997	Rrm1	protein-coding	0.721972	7.9874	22.0722	1.64e-13	2.16e-12	20.7792
72017	chr1	134405990;134406313;134406599;134407046;134407574;134408404;134409601;134410493;134410907	134406053;134406462;134406671;134407152;134407703;134408487;134409686;134410592;134411738	+	1626	Cyb5r1	protein-coding	0.914126	5.99933	21.8387	1.94e-13	2.48e-12	20.7664
18799	chr9	119071527;119072023;119072250;119072475;119073456;119073763;119074165;119074410;119074636;119074873;119075764;119076084;119080922;119084590;119093358	119071887;119072172;119072382;119072653;119073572;119073922;119074323;119074559;119074780;119075074;119075995;119076213;119081150;119084754;119093496	-	2651	Plcd1	protein-coding	1.19187	4.92985	21.6291	2.26e-13	2.83e-12	20.7639
72341	chr9	110305192;110310095;110312569;110313976;110315751;110319570;110320815	110305349;110310173;110312639;110314094;110315952;110319716;110322102	+	2064	Elp6	protein-coding	1.70148	4.13016	21.4422	2.59e-13	3.17e-12	20.7574
52696	chr10	72654895;72655983;72656238;72656530;72656817;72657046;72657266;72667899	72654977;72656073;72656361;72656696;72656873;72657185;72657388;72669789	+	2676	Zwint	protein-coding	-0.837092	7.56413	-21.9952	1.74e-13	2.25e-12	20.747
26569	chr2	29802680;29804160;29805616;29807356;29809662;29809836;29810861;29811186;29811569;29812265;29812552;29812788;29815576	29802960;29804326;29806010;29807514;29809731;29809927;29810970;29811395;29811695;29812402;29812716;29812934;29817522	+	4008	Slc27a4	protein-coding	-0.852499	6.19848	-21.8318	1.95e-13	2.48e-12	20.7393
23970	chr15	83375607;83378999;83379684;83381762;83384987;83386662;83388515;83390423;83392501;83401867;83432664;83464459	83377730;83379195;83379806;83381883;83385107;83386837;83388670;83390658;83392657;83401999;83432850;83464606	-	3880	Pacsin2	protein-coding	-0.859687	7.50454	-21.9555	1.79e-13	2.29e-12	20.7212
12359	chr2	103453904;103455078;103456850;103460242;103463287;103467077;103467694;103470299;103471766;103472951;103474330;103476749;103484973	103454821;103455161;103456957;103460372;103463425;103467229;103467885;103470424;103471870;103473081;103474440;103476920;103485153	-	2551	Cat	protein-coding	1.21913	4.79849	21.5443	2.4e-13	2.97e-12	20.7207
77087	chr8	122883822;122885650;122887314;122887528;122889639;122896560;122898574;122899604;122899979;122900602;122908668;122915901;122974729;123041949	122884336;122885742;122887457;122887626;122896156;122896707;122898716;122899807;122900149;122900698;122908806;122916045;122974792;123042284	-	8816	Ankrd11	protein-coding	-0.932587	7.91967	-21.9757	1.76e-13	2.27e-12	20.7117
11772	chr7	141562180;141588286;141597473;141598702;141602233;141604909;141609807;141611336;141612629;141614199;141619451;141620472;141620792;141621115;141623618;141626108;141627894;141629190;141630059;141630285;141630437;141631292	141562426;141588354;141597615;141598895;141602362;141605010;141609915;141611483;141612797;141614336;141619633;141620569;141621023;141621288;141623781;141626190;141627983;141629313;141630175;141630354;141630571;141633011	+	4639	Ap2a2	protein-coding	-0.758977	8.02961	-21.9782	1.76e-13	2.27e-12	20.7068
209027	chr11	120635712;120640200;120641142;120641429;120641650;120642115;120642892;120643159	120637234;120640348;120641305;120641521;120641871;120642294;120642962;120643670	-	2914	Pycr1	protein-coding	1.92013	3.16451	21.2229	3.04e-13	3.61e-12	20.7049
14531	chr9	78051958;78053812;78059576;78061348;78062411;78064349	78052040;78053991;78059828;78061460;78062539;78065624	+	2034	Gcm1	protein-coding	-2.87363	1.94286	-21.3702	2.73e-13	3.3e-12	20.703
19285	chr11	100956736;100969990	100959325;100970617	-	3218	Ptrf	protein-coding	-1.23321	5.90392	-21.7245	2.11e-13	2.66e-12	20.7025
319804	chr5	127632262;127644319;127650683;127657087;127663342;127664652;127677205;127678091;127689837;127690990;127694227;127706863	127632351;127644467;127650788;127657138;127663378;127664708;127677300;127678140;127689880;127691110;127694325;127707520	+	1559	Glt1d1	protein-coding	1.68409	3.69228	21.282	2.91e-13	3.49e-12	20.6938
21401	chr4	136247957;136253746;136254465;136255150;136257924;136264447;136264872;136268009;136271233;136273644;136274780	136248117;136253808;136254570;136255288;136257986;136264610;136264928;136268163;136271379;136273715;136274899	+	1247	Tcea3	protein-coding	1.11635	5.21198	21.5536	2.39e-13	2.96e-12	20.6625
11736	chr11	72690002;72712157;72714365;72722628;72728761;72730472;72732248;72738252;72739989;72740402;72746856;72749300;72750080;72750401;72752065;72753600;72754337;72755690;72757293;72758453;72759916;72760240;72761363;72764777;72767513	72690034;72712349;72714483;72722763;72728884;72730621;72732413;72738456;72740057;72740601;72746953;72749528;72750178;72750554;72752233;72753718;72754493;72755890;72757469;72758600;72760006;72760364;72761509;72764867;72772146	+	8034	Ankfy1	protein-coding	-0.824775	7.1275	-21.8364	1.95e-13	2.48e-12	20.657
12955	chr9	50752758;50754512;50756292	50753477;50754634;50756633	+	1185	Cryab	protein-coding	-1.67872	3.96167	-21.2634	2.95e-13	3.53e-12	20.6498
68828	chr4	129287621;129293227;129306342;129306628;129308042	129287788;129294376;129306466;129306704;129308559	+	2038	Sync	protein-coding	-1.66158	3.64667	-21.2115	3.07e-13	3.64e-12	20.6494
50527	chr14	45283087;45287733;45287976;45292362;45292931;45294304;45294511;45295972;45299046;45299842;45301693;45301849;45303549;45305249;45306512;45318377	45286088;45287866;45288062;45292431;45293177;45294396;45294537;45295983;45299083;45299962;45301766;45301922;45303587;45305332;45306631;45318572	-	4418	Ero1l	protein-coding	1.21839	5.60018	21.6021	2.3e-13	2.87e-12	20.6462
20751	chr6	85133680;85136823;85137439	85134288;85137113;85137764	-	1226	Spr	protein-coding	-0.762406	7.0922	-21.7997	2e-13	2.54e-12	20.6312
56878	chr2	60751953;60753730;60755416;60756436;60758804;60759759;60762053;60762270;60763236;60779731;60781861;60792689;60797684;60842297;60881118;60962691	60752982;60753814;60755496;60756546;60758854;60759806;60762146;60762319;60763342;60779810;60782018;60792780;60797742;60842472;60881438;60963204	-	3057	Rbms1	protein-coding	-1.06061	5.58415	-21.5739	2.35e-13	2.92e-12	20.6263
227700	chr2	30344809;30345699;30346353;30346611;30347081;30348555;30350288;30350584;30354853;30355261;30359143	30345427;30345939;30346453;30346700;30347104;30348617;30350380;30350717;30354981;30355402;30359231	-	1725	Sh3glb2	protein-coding	-1.04657	6.38242	-21.6985	2.15e-13	2.7e-12	20.6225
18476	chr7	25295049;25296121;25296321;25297086;25297372;25297843	25295376;25296243;25296437;25297175;25297470;25297955	-	870	Pafah1b3	protein-coding	1.09764	5.05688	21.4708	2.54e-13	3.12e-12	20.6224
80915	chr1	170874188;170879660;170880130;170880573;170880915;170885067	170874570;170879846;170880226;170880691;170881028;170885540	-	1374	Dusp12	protein-coding	-1.02238	5.48941	-21.5505	2.39e-13	2.96e-12	20.6207
232223	chr6	89643988;89650526;89651499;89654054;89654349;89656028;89661459;89663077;89664378;89665700;89669305;89669818;89672171;89672968;89674061;89674729	89644402;89650586;89651608;89654158;89654421;89656147;89661601;89663192;89664603;89665792;89669381;89669974;89672278;89673063;89674195;89675529	+	2836	Txnrd3	protein-coding	1.61939	3.65872	21.18	3.14e-13	3.71e-12	20.6189
67255	chr6	116624016;116628931	116627133;116628977	-	3165	Zfp422	protein-coding	-2.10081	3.11304	-21.0934	3.35e-13	3.91e-12	20.6163
72061	chr13	63014934;63033023;63061035;63068040;63156546;63170941;63190479;63191066;63199507;63210106;63240087;63240257;63282142;63296858;63298712	63015963;63033189;63061194;63068285;63156735;63171047;63190581;63191173;63199550;63210166;63240155;63240331;63282258;63296944;63299656	+	3509	2010111I01Rik	protein-coding	-1.36208	4.80938	-21.3869	2.7e-13	3.27e-12	20.6077
76089	chr3	79062528;79066573;79068889;79069990;79074308;79079006;79081062;79082624;79083199;79083409;79085745;79087845;79088645;79091812;79092497;79092700;79092995;79094285;79094813;79098220;79099094;79103963;79112171;79145771	79064561;79066872;79069448;79070215;79074460;79079212;79081285;79082647;79083322;79083620;79086128;79088085;79088802;79092058;79092605;79092903;79093102;79094449;79094965;79098378;79099230;79104140;79112302;79145875	-	6544	Rapgef2	protein-coding	-0.963678	6.13331	-21.6428	2.24e-13	2.81e-12	20.6063
72289	chr19	5795690	5802671	-	6982	Malat1	ncRNA	-1.00911	12.0216	-22.0813	1.63e-13	2.15e-12	20.6045
76687	chr8	54520433;54524941;54526451;54528342;54529763	54523395;54525056;54526527;54528415;54529998	-	3466	Spcs3	protein-coding	1.00059	7.0355	21.7375	2.09e-13	2.64e-12	20.5896
75430	chr7	101896415;101897733;101897942;101898554;101898900;101899194	101896450;101897817;101898071;101898613;101899037;101899543	+	799	Anapc15	protein-coding	0.959357	5.87187	21.5741	2.35e-13	2.92e-12	20.5831
67226	chr10	115340739;115343698;115347032;115347646;115359654;115361809;115362052	115342669;115343907;115347286;115347783;115359767;115361959;115362262	-	3010	Tmem19	protein-coding	-1.13012	5.83017	-21.5422	2.41e-13	2.97e-12	20.5709
12968	chr1	65048557;65050770;65051105	65048896;65051012;65051163	-	642	Cryge	protein-coding	3.64218	1.36215	21.4172	2.64e-13	3.22e-12	20.5688
27176	chr2	26910807;26911006;26911422;26912019;26912366;26912671;26912988;26913165	26910830;26911126;26911571;26912159;26912445;26912801;26913057;26913311	+	864	Rpl7a	protein-coding	0.809955	9.93936	21.9239	1.83e-13	2.34e-12	20.5679
67739	chr15	97784365;97789903;97790587	97784616;97790070;97792692	+	2526	Slc48a1	protein-coding	-1.48882	4.19396	-21.2012	3.09e-13	3.66e-12	20.5631
54667	chr3	89939481;89941675;89943330;89943614;89944109;89944997;89945482;89945921;89946179;89946428;89946625;89947804;89948047;89948387;89948969;89949809;89952675;89954202;89954440;89957011;89957298;89957809;89957978;89958289;89958509;89958991;89961075;89963157	89941431;89941805;89943468;89943859;89944192;89945220;89945665;89946137;89946284;89946539;89946789;89947919;89948235;89948552;89949012;89950017;89952871;89954290;89954598;89957090;89957368;89957881;89958039;89958387;89958622;89959049;89961141;89963508	-	5705	Atp8b2	protein-coding	0.974276	6.28355	21.6101	2.29e-13	2.87e-12	20.5621
78248	chrX	134717938;134718370;134718726;134718920;134719627;134720034	134718050;134718461;134718818;134719108;134719725;134721917	+	2470	Armcx1	protein-coding	1.26841	4.465	21.2617	2.96e-13	3.53e-12	20.5579
55992	chr7	105610470;105611329;105612607;105612898;105613249;105617441;105617742;105618666;105619059;105619383;105625406;105633403	105611210;105611469;105612677;105613066;105613416;105617544;105618474;105618846;105619210;105619614;105625571;105633499	-	2955	Trim3	protein-coding	-1.14674	4.51416	-21.2711	2.94e-13	3.51e-12	20.5578
22770	chr15	58047003;58052224;58064055;58069319;58076157	58048785;58055082;58064180;58069429;58076489	-	5212	Zhx1	protein-coding	-1.8517	3.5821	-21.0717	3.4e-13	3.96e-12	20.5566
71883	chr5	100654726;100657818;100660172;100661837;100663580;100667892;100673989	100655471;100658006;100660305;100661922;100663701;100668058;100674256	-	1712	Coq2	protein-coding	-1.07668	5.04665	-21.3717	2.73e-13	3.3e-12	20.5514
329217	chr1	96872221;96877834	96872668;96881234	+	3849	Panct2	ncRNA	1.62245	4.18991	21.1798	3.14e-13	3.71e-12	20.5474
66420	chr10	80035953;80036527;80036764;80036915;80037188;80038439;80039583	80036301;80036598;80036842;80036973;80037384;80038613;80039659	-	1008	Polr2e	protein-coding	0.931075	7.76968	21.7468	2.08e-13	2.62e-12	20.5474
56791	chr2	84798828;84802779;84806337;84809005	84798932;84802874;84806523;84810003	+	1387	Ube2l6	protein-coding	3.2307	2.16835	21.076	3.39e-13	3.95e-12	20.5253
72584	chrX	38531616;38537122;38538954;38540000;38540937;38542051;38543332;38544749;38545496;38546692;38547847;38548429;38549209;38549588;38549837;38550866;38551654;38552382;38561609;38563663;38564933;38572404;38576080	38533728;38537274;38539126;38540105;38541050;38542158;38543417;38544859;38545600;38546884;38547965;38548496;38549291;38549677;38549999;38550939;38551723;38552485;38561724;38564208;38565106;38572478;38576196	-	5061	Cul4b	protein-coding	-0.794319	8.58738	-21.7774	2.03e-13	2.57e-12	20.5249
270210	chr9	121760033;121762619;121765483;121766467;121767239;121767495	121760225;121764121;121765630;121766582;121767383;121771742	+	6353	Zfp651	protein-coding	-2.12366	2.70887	-20.9551	3.71e-13	4.26e-12	20.5202
66482	chr13	30813918;30817998;30820578;30822632;30826039;30856654;30864831;30867972;30871119;30871842;30872289;30875259;30876731;30877243;30877548;30882249;30886189;30900785;30905653;30906503;30906732;30911170;30925723;30927308;30935495;30938116;30940610;30973996	30815391;30818057;30820639;30822754;30826094;30856795;30864947;30868038;30871180;30871901;30872369;30875320;30876852;30877400;30877613;30882373;30886314;30900903;30905755;30906584;30906877;30911250;30925847;30927421;30935621;30938292;30940770;30974047	-	4250	Exoc2	protein-coding	-0.921859	5.82657	-21.4732	2.53e-13	3.11e-12	20.5139
[truncated: 13,161 more rows]
