# Supplementary material for: Transcriptional repression by FACT is linked to regulation of chromatin accessibility at the promoter of ES cells
Source: Life Sci Alliance. 2018 Jun 13;1(3):e201800085. doi: 10.26508/lsa.201800085 (PMC6238418; doi:10.26508/lsa.201800085)
Supplement: Supplementary file 2 [file LSA-2018-00085_TableS2.xlsx]

## Sheet: Ssrp1-KD_differential-splicing_
Differential spliced exon list (Ssrp1 KD vs Control)
ExonID	GeneID	Chr	Start	End	Strand	Length	Symbol	type_of_gene	logFC	t	P.Value	FDR	Gene_expression_Status
9175.1	54387	chr10	76469949	76471252	+	1304	Mcm3ap	protein-coding	1.15629	17.4486	8.35e-41	1.9e-36	downregulated
1533.8	13859	chr8	72377417	72379155	-	1739	Eps15l1	protein-coding	-1.0496	-14.5598	4.73e-28	4.04e-24	down-regulated
6157.11	22003	chr9	67043578	67043871	-	294	Tpm1	protein-coding	1.44881	14.3181	1.87e-26	1.42e-22	down-regulated
1533	13859	chr8	72340995	72341524	-	530	Eps15l1	protein-coding	1.12191	11.7253	1.75e-21	6.65e-18	down-regulated
6862.9	26558	chr8	70292975	70294361	+	1387	Homer3	protein-coding	1.15137	11.2626	8.3e-18	1.42e-14	down-regulated
3344.1	17246	chr10	117709946	117710028	-	83	Mdm2	protein-coding	1.24712	10.3244	4.12e-17	5.99e-14	down-regulated
3184.24	16978	chr1	91128086	91128944	+	859	Lrrfip1	protein-coding	-1.68175	-10.9292	1.01e-16	1.33e-13	down-regulated
28480.1	213109	chr1	30829843	30831559	-	1717	Phf3	protein-coding	0.460604	9.68154	1.21e-16	1.53e-13	down-regulated
5465	20908	chr19	11775118	11776588	-	1471	Stx3	protein-coding	1.44066	11.1955	1.21e-16	1.53e-13	down-regulated
6335	22288	chr10	12382188	12384196	-	2009	Utrn	protein-coding	0.587073	8.48626	6.38e-16	7.79e-13	down-regulated
20735.2	83997	chr14	26533328	26533740	-	413	Slmap	protein-coding	0.905996	9.24632	2.96e-15	3.16e-12	down-regulated
28876	217154	chr11	98036624	98038070	-	1447	Stac2	protein-coding	-2.16326	-11.1167	1.59e-14	1.37e-11	down-regulated
27407.2	117146	chr5	114387094	114387278	+	185	Ube3b	protein-coding	1.22419	8.60068	4.11e-14	3.27e-11	down-regulated
16358.1	72145	chr5	101844017	101844214	-	198	Wdfy3	protein-coding	1.39267	8.09631	1.01e-13	7.61e-11	down-regulated
28876.1	217154	chr11	98052893	98053462	-	570	Stac2	protein-coding	2.64	10.4986	1.04e-13	7.66e-11	down-regulated
23544.1	107831	chr15	74528930	74529940	+	1011	Adgrb1	protein-coding	-2.57481	-10.3594	1.6e-13	1.13e-10	down-regulated
20111.8	78286	chr7	49452399	49453506	+	1108	Nav2	protein-coding	2.33344	9.71068	3.32e-13	2.18e-10	down-regulated
9175.4	54387	chr10	76476783	76476924	+	142	Mcm3ap	protein-coding	1.35029	7.77692	5.21e-13	3.21e-10	down-regulated
4176.1	18803	chr2	160731718	160732033	+	316	Plcg1	protein-coding	0.875066	7.70593	1e-12	5.73e-10	down-regulated
20111.4	78286	chr7	49606696	49610088	+	3393	Nav2	protein-coding	-1.87276	-9.30165	1.37e-12	7.7e-10	down-regulated
6335.23	22288	chr10	12538041	12538213	-	173	Utrn	protein-coding	1.05004	7.33804	1.56e-12	8.69e-10	down-regulated
22258.1	102103	chr8	41082614	41084840	-	2227	Mtus1	protein-coding	-0.743041	-8.51163	2.26e-12	1.19e-09	down-regulated
9745.1	57247	chr8	123267770	123270551	+	2782	Zfp276	protein-coding	1.03494	8.71232	4.42e-12	2.21e-09	down-regulated
14717	69354	chr15	96994823	96997091	-	2269	Slc38a4	protein-coding	0.38984	7.81315	5.95e-12	2.93e-09	down-regulated
9836.2	57752	chr7	130621721	130626841	+	5121	Tacc2	protein-coding	-0.677175	-7.67759	6.77e-12	3.28e-09	down-regulated
34359.1	326622	chr2	5957471	5957850	+	380	Upf2	protein-coding	0.655763	7.43974	8.97e-12	4.26e-09	down-regulated
3184.19	16978	chr1	91114596	91117322	+	2727	Lrrfip1	protein-coding	0.789339	8.15016	1.04e-11	4.83e-09	down-regulated
24581.2	109674	chr3	108086218	108086627	-	410	Ampd2	protein-coding	1.06765	7.47786	1.23e-11	5.56e-09	down-regulated
3344.11	17246	chr10	117710552	117710716	-	165	Mdm2	protein-coding	1.40452	7.63518	1.92e-11	8.48e-09	down-regulated
8504.7	52696	chr10	72667899	72669789	+	1891	Zwint	protein-coding	-0.63349	-8.16678	3.53e-11	1.43e-08	down-regulated
9175.6	54387	chr10	76481001	76481140	+	140	Mcm3ap	protein-coding	0.8956	7.00193	4.63e-11	1.81e-08	down-regulated
6157.13	22003	chr9	67048124	67048249	-	126	Tpm1	protein-coding	-1.32885	-7.31991	5.17e-11	2.01e-08	down-regulated
24550	109624	chr6	34709444	34709697	+	254	Cald1	protein-coding	0.910893	7.54591	5.77e-11	2.2e-08	down-regulated
1982.6	14676	chr10	81523810	81524225	-	416	Gna15	protein-coding	-1.74062	-8.43344	7.82e-11	2.8e-08	down-regulated
22258.9	102103	chr8	41041473	41041911	-	439	Mtus1	protein-coding	1.89425	7.66076	8.19e-11	2.9e-08	down-regulated
23544.3	107831	chr15	74588687	74589464	+	778	Adgrb1	protein-coding	1.6359	8.3777	9.41e-11	3.3e-08	down-regulated
17546	74108	chr16	13537964	13538902	-	939	Parn	protein-coding	-0.889557	-7.89506	1e-10	3.47e-08	down-regulated
27407.3	117146	chr5	114419478	114421166	+	1689	Ube3b	protein-coding	-0.522111	-7.06139	1.26e-10	4.19e-08	down-regulated
21170	94089	chr11	48826138	48826279	+	142	Trim7	protein-coding	1.26473	8.19749	1.72e-10	5.54e-08	down-regulated
30350.1	234663	chr8	104442695	104443047	-	353	Dync1li2	protein-coding	1.07936	7.08051	3.47e-10	1.03e-07	down-regulated
17723	74349	chr7	105371211	105379129	-	7919	Fam160a2	protein-coding	0.581786	7.14534	3.49e-10	1.03e-07	down-regulated
35246	380614	chr3	40653702	40654253	+	552	Intu	protein-coding	1.01373	7.644	5.11e-10	1.43e-07	down-regulated
10013	59033	chr15	100761747	100761974	+	228	Slc4a8	protein-coding	1.91637	6.63892	6.3e-10	1.74e-07	down-regulated
14936.1	69697	chr8	3597842	3598095	+	254	Camsap3	protein-coding	1.28506	6.76887	9.21e-10	2.46e-07	down-regulated
28383	211978	chr12	79232347	79234169	-	1823	Zfyve26	protein-coding	-0.552471	-6.48227	1.08e-09	2.81e-07	down-regulated
22589.7	104001	chr12	72303657	72304418	-	762	Rtn1	protein-coding	-2.06815	-7.42528	1.13e-09	2.91e-07	down-regulated
7893.4	50754	chr3	84903501	84904079	+	579	Fbxw7	protein-coding	0.647113	6.7694	1.13e-09	2.91e-07	down-regulated
7893	50754	chr3	84815577	84815769	+	193	Fbxw7	protein-coding	0.815065	6.75595	1.21e-09	3.09e-07	down-regulated
29671.2	228836	chr2	156700606	156701674	+	1069	Dlgap4	protein-coding	1.78092	7.0176	1.83e-09	4.55e-07	down-regulated
6088.56	21894	chr4	43562130	43562583	-	454	Tln1	protein-coding	0.796215	6.16612	1.92e-09	4.73e-07	down-regulated
9175.2	54387	chr10	76471423	76471649	+	227	Mcm3ap	protein-coding	0.829669	6.3018	2.13e-09	5.21e-07	down-regulated
9221	54610	chr1	39371495	39372786	-	1292	Tbc1d8	protein-coding	0.569507	6.42403	2.33e-09	5.62e-07	down-regulated
31070.7	242669	chr4	128959784	128959957	-	174	Azin2	protein-coding	-0.927044	-6.62838	2.71e-09	6.49e-07	down-regulated
34935.2	347722	chr1	89888691	89895282	+	6592	Agap1	protein-coding	0.50979	6.42437	4.62e-09	1.05e-06	down-regulated
29682.1	228880	chr2	165815317	165815469	-	153	Zmynd8	protein-coding	0.619055	6.3024	4.74e-09	1.07e-06	down-regulated
31232.2	244219	chr7	127876047	127876823	-	777	Zfp668	protein-coding	-0.849249	-7.18024	5.36e-09	1.2e-06	down-regulated
6265	22184	chrX	163935443	163936965	-	1523	Zrsr2	protein-coding	0.868622	6.64608	5.72e-09	1.27e-06	down-regulated
5366	20740	chr2	29965560	29965785	+	226	Sptan1	protein-coding	0.920409	5.98986	5.83e-09	1.29e-06	down-regulated
6335.2	22288	chr10	12486386	12486654	-	269	Utrn	protein-coding	0.571605	5.96915	5.92e-09	1.31e-06	down-regulated
14452.3	68875	chr1	132380657	132381181	-	525	Tmcc2	protein-coding	1.42615	6.96015	6.16e-09	1.36e-06	down-regulated
17546.2	74108	chr16	13566570	13566738	-	169	Parn	protein-coding	1.29736	6.7799	7.27e-09	1.56e-06	down-regulated
6157.1	22003	chr9	67023842	67024565	-	724	Tpm1	protein-coding	-0.821424	-6.2915	7.33e-09	1.57e-06	down-regulated
1757	14270	chr1	131285251	131289740	-	4490	Srgap2	protein-coding	0.411432	6.25481	7.6e-09	1.62e-06	down-regulated
25003.7	110253	chr15	78966294	78968842	+	2549	Triobp	protein-coding	1.15816	6.37997	8.23e-09	1.75e-06	down-regulated
25025.2	110279	chr10	75182240	75184923	+	2684	Bcr	protein-coding	-0.701191	-6.37827	1.31e-08	2.66e-06	down-regulated
16306	72061	chr13	63014934	63015963	+	1030	2010111I01Rik	protein-coding	-1.07067	-6.84921	1.66e-08	3.32e-06	down-regulated
2006.1	14705	chr19	8839328	8839784	+	457	Bscl2	protein-coding	1.26088	6.36079	1.86e-08	3.66e-06	down-regulated
2809.24	16403	chr2	71853534	71853663	+	130	Itga6	protein-coding	-1.46427	-5.90133	2.23e-08	4.35e-06	down-regulated
1888.17	14534	chr11	100712081	100712467	-	387	Kat2a	protein-coding	0.741154	5.96267	2.68e-08	5.11e-06	down-regulated
5274.4	20618	chr14	34374460	34374669	-	210	Sncg	protein-coding	1.02209	6.69927	2.78e-08	5.26e-06	down-regulated
6157.12	22003	chr9	67047786	67047911	-	126	Tpm1	protein-coding	-0.594457	-6.0036	2.79e-08	5.26e-06	down-regulated
21170.6	94089	chr11	48849478	48850195	+	718	Trim7	protein-coding	-0.95852	-6.6538	3.25e-08	6.05e-06	down-regulated
6577	23807	chr9	108602942	108605153	-	2212	Arih2	protein-coding	0.351324	5.9896	3.38e-08	6.22e-06	down-regulated
15158.2	70097	chr10	8885724	8886070	-	347	Sash1	protein-coding	1.01972	6.05666	3.43e-08	6.26e-06	down-regulated
9532.3	56460	chr7	141082555	141083186	+	632	Pkp3	protein-coding	-1.04021	-6.05173	5.18e-08	8.88e-06	down-regulated
115	11569	chr6	140622663	140623058	+	396	Aebp2	protein-coding	-0.571496	-6.03826	5.48e-08	9.34e-06	down-regulated
28107.8	208198	chr10	80656130	80657071	-	942	Btbd2	protein-coding	0.859898	6.02398	5.82e-08	9.82e-06	down-regulated
7761.7	29870	chr15	85871509	85871581	+	73	Gtse1	protein-coding	-1.28669	-5.89645	6.88e-08	1.14e-05	down-regulated
15936.1	71458	chrX	12079818	12080553	-	736	Bcor	protein-coding	0.770383	5.82581	7.06e-08	1.17e-05	down-regulated
18707	75788	chr5	144876495	144879456	-	2962	Smurf1	protein-coding	-0.478476	-5.80157	7.86e-08	1.28e-05	down-regulated
14332.9	68628	chr8	85066590	85067121	+	532	Fbxw9	protein-coding	0.370181	5.9029	7.94e-08	1.29e-05	down-regulated
1533.5	13859	chr8	72371686	72371822	-	137	Eps15l1	protein-coding	1.17084	5.70486	8.89e-08	1.43e-05	down-regulated
22258	102103	chr8	40990912	40993633	-	2722	Mtus1	protein-coding	0.529976	5.93029	1.07e-07	1.71e-05	down-regulated
6036.1	21817	chr2	158138707	158138949	-	243	Tgm2	protein-coding	0.91199	5.68844	1.68e-07	2.54e-05	down-regulated
2022	14725	chr2	69424335	69425803	-	1469	Lrp2	protein-coding	0.481273	5.31266	1.83e-07	2.73e-05	down-regulated
5465.2	20908	chr19	11777487	11779173	-	1687	Stx3	protein-coding	-0.654339	-5.82467	2.08e-07	3.06e-05	down-regulated
1046	13048	chr5	121860216	121861381	-	1166	Cux2	protein-coding	1.93818	6.09376	2.23e-07	3.23e-05	down-regulated
14936	69697	chr8	3587450	3587959	+	510	Camsap3	protein-coding	1.49976	5.51643	2.76e-07	3.91e-05	down-regulated
2311.14	15259	chr2	104470749	104471847	-	1099	Hipk3	protein-coding	-0.509333	-5.55387	2.98e-07	4.18e-05	down-regulated
13162.1	66841	chr3	79628518	79628767	-	250	Etfdh	protein-coding	0.738039	5.54879	3.04e-07	4.25e-05	down-regulated
19640.3	77569	chr5	67054236	67057159	+	2924	Limch1	protein-coding	1.46071	6.12587	3.39e-07	4.65e-05	down-regulated
19640.1	77569	chr5	66998980	66999388	+	409	Limch1	protein-coding	-1.46071	-6.12587	3.39e-07	4.65e-05	down-regulated
6036.11	21817	chr2	158142995	158143174	-	180	Tgm2	protein-coding	0.953143	5.50979	3.59e-07	4.84e-05	down-regulated
29577.2	227723	chr2	32212887	32214947	+	2061	Prrc2b	protein-coding	-0.566372	-5.25091	3.94e-07	5.21e-05	down-regulated
534.14	12305	chr17	35692856	35693084	-	229	Ddr1	protein-coding	-1.06245	-5.39589	4.23e-07	5.54e-05	down-regulated
27407.1	117146	chr5	114402522	114402689	+	168	Ube3b	protein-coding	1.01664	5.35408	4.34e-07	5.66e-05	down-regulated
1046.5	13048	chr5	121869008	121869780	-	773	Cux2	protein-coding	-1.6178	-5.89811	4.35e-07	5.66e-05	down-regulated
20456.1	78908	chr3	101459787	101463060	+	3274	Igsf3	protein-coding	-0.455176	-5.45119	4.59e-07	5.96e-05	down-regulated
3707.24	18033	chr3	135691123	135691547	-	425	Nfkb1	protein-coding	0.879647	5.29307	5.01e-07	6.39e-05	down-regulated
16082.1	71729	chr5	34964773	34966755	+	1983	Rgs12	protein-coding	0.567142	5.49943	5.02e-07	6.39e-05	down-regulated
13430	67225	chr3	113605067	113607299	-	2233	Rnpc3	protein-coding	0.574496	5.42003	5.96e-07	7.46e-05	down-regulated
28555	213990	chr5	24452177	24452534	+	358	Agap3	protein-coding	0.755851	5.28058	6.01e-07	7.49e-05	down-regulated
5852.1	21343	chr5	138179413	138179610	-	198	Taf6	protein-coding	0.506907	5.32709	6.89e-07	8.39e-05	down-regulated
22233.2	101943	chr8	110846675	110846803	-	129	Sf3b3	protein-coding	0.951597	5.13948	7.02e-07	8.51e-05	down-regulated
9745	57247	chr8	123254195	123254923	+	729	Zfp276	protein-coding	-0.834979	-5.57344	7.03e-07	8.51e-05	down-regulated
27407	117146	chr5	114380607	114380975	+	369	Ube3b	protein-coding	1.07931	5.21475	8.02e-07	9.6e-05	down-regulated
6808	26408	chr10	19934526	19935074	+	549	Map3k5	protein-coding	0.854908	5.37213	8.37e-07	9.92e-05	down-regulated
27407.3	117146	chr5	114387381	114387501	+	121	Ube3b	protein-coding	1.33705	5.1996	8.57e-07	0.000101167	down-regulated
4269.8	19043	chr17	85015409	85017128	+	1720	Ppm1b	protein-coding	0.51016	5.38685	9.31e-07	0.00010846	down-regulated
22589	104001	chr12	72211752	72212577	-	826	Rtn1	protein-coding	1.19634	5.52027	1.13e-06	0.00012901	down-regulated
3147	16886	chr11	3343297	3345884	-	2588	Limk2	protein-coding	0.270833	5.15836	1.28e-06	0.000143174	down-regulated
15792	71228	chr14	24133953	24135673	-	1721	Dlg5	protein-coding	0.43389	5.02905	1.32e-06	0.000146493	down-regulated
29279	224826	chr17	46928291	46930500	-	2210	Ubr2	protein-coding	0.560882	5.03175	1.35e-06	0.000148885	down-regulated
14048	68108	chr2	158353700	158356041	-	2342	Snhg17	ncRNA	0.55918	5.39049	1.39e-06	0.000152731	down-regulated
31070	242669	chr4	128932146	128932491	-	346	Azin2	protein-coding	0.508399	5.14605	1.62e-06	0.000175242	down-regulated
5465.14	20908	chr19	11818692	11819403	-	712	Stx3	protein-coding	-0.973366	-5.26441	1.79e-06	0.000191114	down-regulated
25052	110310	chr15	101412403	101412779	+	377	Krt7	protein-coding	0.574945	5.21548	1.81e-06	0.000192653	down-regulated
3184.1	16978	chr1	91053444	91053723	+	280	Lrrfip1	protein-coding	1.07004	5.21446	1.82e-06	0.000193111	down-regulated
35387.2	381290	chr1	133739163	133739420	-	258	Atp2b4	protein-coding	1.21004	5.06073	2.09e-06	0.000216898	down-regulated
21964.4	100206	chr4	126318399	126318495	-	97	Adprhl2	protein-coding	1.08191	5.26208	2.22e-06	0.000228437	down-regulated
9745.3	57247	chr8	123256419	123256865	+	447	Zfp276	protein-coding	-0.941497	-5.25115	2.31e-06	0.000236535	down-regulated
9110.5	54132	chr19	40251910	40252061	-	152	Pdlim1	protein-coding	0.715969	5.24401	2.37e-06	0.00024206	down-regulated
1533.7	13859	chr8	72373823	72373946	-	124	Eps15l1	protein-coding	0.909966	4.96296	2.38e-06	0.00024206	down-regulated
6157	22003	chr9	67022593	67023441	-	849	Tpm1	protein-coding	0.277863	4.97599	2.54e-06	0.000257305	down-regulated
1888.12	14534	chr11	100710445	100710636	-	192	Kat2a	protein-coding	0.742516	4.90915	2.99e-06	0.000296765	down-regulated
31070.8	242669	chr4	128961363	128961559	-	197	Azin2	protein-coding	-0.565316	-4.97479	3.25e-06	0.000318448	down-regulated
4412.12	19250	chr1	189850024	189851507	+	1484	Ptpn14	protein-coding	0.386302	4.94035	3.42e-06	0.000333507	down-regulated
6157.14	22003	chr9	67049019	67049213	-	195	Tpm1	protein-coding	-0.408213	-4.87817	3.82e-06	0.000366781	down-regulated
29571.9	227700	chr2	30355261	30355402	-	142	Sh3glb2	protein-coding	0.758589	4.93316	4.23e-06	0.0004009	down-regulated
23238.2	106877	chr18	61735568	61735746	-	179	Afap1l1	protein-coding	0.803536	5.04114	4.96e-06	0.000462186	down-regulated
3147.15	16886	chr11	3370969	3371392	-	424	Limk2	protein-coding	-0.376492	-4.82922	4.99e-06	0.000463053	down-regulated
28555.8	213990	chr5	24482266	24483184	+	919	Agap3	protein-coding	-0.803623	-4.7841	5.05e-06	0.000466223	down-regulated
13459.2	67269	chr13	59514087	59514295	-	209	Agtpbp1	protein-coding	-0.934417	-4.8325	5.29e-06	0.000482528	down-regulated
9175.5	54387	chr10	76477720	76477910	+	191	Mcm3ap	protein-coding	0.735926	4.69119	5.3e-06	0.000482878	down-regulated
14577.5	69104	chr19	37221390	37224457	+	3068	2017-03-05	protein-coding	0.305514	4.95818	5.64e-06	0.000509731	down-regulated
30682.1	238317	chr12	84193499	84194015	-	517	Elmsan1	protein-coding	0.740684	4.88589	5.66e-06	0.000511398	down-regulated
25052.6	110310	chr15	101423270	101423490	+	221	Krt7	protein-coding	-0.546755	-4.90201	6.02e-06	0.00053923	down-regulated
28630	214897	chr9	65909010	65909168	+	159	Csnk1g1	protein-coding	1.28172	4.859	6.28e-06	0.000560453	down-regulated
17543	74105	chr7	121986722	121989801	-	3080	Gga2	protein-coding	0.423541	4.71628	6.68e-06	0.000588908	down-regulated
34908.3	338355	chr4	62360370	62360548	-	179	Fkbp15	protein-coding	1.42744	4.70152	6.8e-06	0.000597223	down-regulated
25025	110279	chr10	75060896	75062310	+	1415	Bcr	protein-coding	0.528501	4.83285	6.94e-06	0.000606136	down-regulated
6862.7	26558	chr8	70291318	70291428	+	111	Homer3	protein-coding	-0.923164	-4.82158	7.25e-06	0.000626476	down-regulated
15685.4	71069	chr8	47287880	47289402	-	1523	Stox2	protein-coding	1.17775	4.98516	7.47e-06	0.000642808	down-regulated
6157.8	22003	chr9	67032794	67032864	-	71	Tpm1	protein-coding	-1.24736	-4.69369	8.12e-06	0.000691641	down-regulated
33580.1	319748	chr7	5028991	5032207	+	3217	Zfp865	protein-coding	-1.27914	-5.08889	9.33e-06	0.00077788	down-regulated
33580.2	319748	chr7	5032763	5033223	+	461	Zfp865	protein-coding	1.27914	5.08889	9.33e-06	0.00077788	down-regulated
5368.4	20742	chr11	30106843	30109152	-	2310	Sptbn1	protein-coding	-0.423927	-4.52792	9.43e-06	0.000783611	down-regulated
20456.4	78908	chr3	101431204	101431593	+	390	Igsf3	protein-coding	0.657607	4.6847	1.02e-05	0.000839465	down-regulated
12796.4	66317	chr9	54724051	54724144	-	94	Wdr61	protein-coding	-0.7367	-4.69121	1.08e-05	0.000877135	down-regulated
33969.7	320394	chr8	105849013	105849055	-	43	Cenpt	protein-coding	-1.10278	-4.62003	1.09e-05	0.000882368	down-regulated
19075.3	76484	chr7	139939727	139941540	+	1814	Kndc1	protein-coding	1.09951	4.93426	1.13e-05	0.000911445	down-regulated
20456.9	78908	chr3	101457623	101458108	+	486	Igsf3	protein-coding	-0.60455	-4.63006	1.27e-05	0.00100432	down-regulated
36704	415115	chr2	164830730	164830987	-	258	Neurl2	protein-coding	1.23615	4.98944	1.28e-05	0.00101037	down-regulated
36704.1	415115	chr2	164832699	164833596	-	898	Neurl2	protein-coding	-1.23615	-4.98944	1.28e-05	0.00101037	down-regulated
29682.1	228880	chr2	165820542	165820688	-	147	Zmynd8	protein-coding	0.558844	4.54526	1.29e-05	0.00101706	down-regulated
30086	232341	chr6	119923969	119926687	-	2719	Wnk1	protein-coding	0.221655	4.47797	1.3e-05	0.00102099	down-regulated
28964	217734	chr12	87106866	87109293	-	2428	Pomt2	protein-coding	0.616888	4.7269	1.32e-05	0.00103057	down-regulated
34063	320554	chr2	104679980	104681958	-	1979	Tcp11l1	protein-coding	-1.19762	-4.95986	1.4e-05	0.00108416	down-regulated
34063.8	320554	chr2	104706356	104706537	-	182	Tcp11l1	protein-coding	1.19762	4.95986	1.4e-05	0.00108416	down-regulated
4181.1	18810	chr15	76178519	76181899	-	3381	Plec	protein-coding	-0.295476	-4.45234	1.56e-05	0.00118599	down-regulated
34135.9	320678	chr6	125160533	125161782	+	1250	Iffo1	protein-coding	0.574627	4.75395	1.66e-05	0.00124665	down-regulated
27147.7	114863	chr8	27053286	27056132	+	2847	Prosc	protein-coding	0.29003	4.63774	1.82e-05	0.00134522	down-regulated
1980.3	14674	chr11	109395914	109401369	+	5456	Gna13	protein-coding	-0.376781	-4.75817	2.03e-05	0.00147814	down-regulated
29171.6	223827	chr15	93261747	93261918	-	172	Gxylt1	protein-coding	-0.790093	-4.63113	2.14e-05	0.00153828	down-regulated
31232	244219	chr7	127865359	127867363	-	2005	Zfp668	protein-coding	0.553727	4.73556	2.19e-05	0.00156576	down-regulated
4437.22	19280	chr17	56428852	56429157	-	306	Ptprs	protein-coding	-0.685099	-4.3459	2.2e-05	0.00157327	down-regulated
612.5	12406	chr7	99352882	99353239	-	358	Serpinh1	protein-coding	-0.966163	-4.61812	2.24e-05	0.00159672	down-regulated
20630.3	81702	chr5	90365667	90366185	-	519	Ankrd17	protein-coding	0.397805	4.32981	2.3e-05	0.00162588	down-regulated
1504.14	13823	chr17	69274704	69274895	+	192	Epb41l3	protein-coding	1.26326	4.65879	2.3e-05	0.00162588	down-regulated
35246.6	380614	chr3	40683357	40683546	+	190	Intu	protein-coding	-1.23639	-4.61952	2.63e-05	0.00182326	down-regulated
34935.2	347722	chr1	89843021	89843243	+	223	Agap1	protein-coding	-0.728037	-4.40983	2.63e-05	0.00182326	down-regulated
29006	218232	chr13	48577872	48579843	-	1972	Ptpdc1	protein-coding	0.659908	4.67618	2.66e-05	0.00183954	down-regulated
1820.9	14388	chr8	80879532	80880479	-	948	Gab1	protein-coding	-0.576041	-4.42859	2.74e-05	0.00188528	down-regulated
6335.4	22288	chr10	12405854	12406094	-	241	Utrn	protein-coding	0.488682	4.24462	2.82e-05	0.00193206	down-regulated
33950.4	320365	chr5	150436701	150437332	+	632	Fry	protein-coding	-0.879708	-4.45854	2.84e-05	0.00194298	down-regulated
8149.2	52055	chr6	85340343	85342361	-	2019	Rab11fip5	protein-coding	0.443748	4.50262	2.95e-05	0.00200305	down-regulated
1982	14676	chr10	81502313	81503105	-	793	Gna15	protein-coding	0.70456	4.61684	3.23e-05	0.00214305	down-regulated
15450.2	70661	chr9	46210476	46210815	+	340	Sik3	protein-coding	0.931283	4.31062	3.68e-05	0.00239831	down-regulated
31124.2	243328	chr5	142711963	142712094	+	132	Slc29a4	protein-coding	1.25865	4.47204	3.73e-05	0.00242595	down-regulated
27407.1	117146	chr5	114404540	114404711	+	172	Ube3b	protein-coding	0.787158	4.28605	3.75e-05	0.0024395	down-regulated
29897	230824	chr4	135541888	135542773	-	886	Grhl3	protein-coding	0.451929	4.3931	3.93e-05	0.00252252	down-regulated
9110.6	54132	chr19	40271346	40271616	-	271	Pdlim1	protein-coding	0.660432	4.45584	3.94e-05	0.00252252	down-regulated
7017.3	27366	chr18	80211413	80212732	+	1320	Txnl4a	protein-coding	0.25191	4.45348	3.97e-05	0.00254087	down-regulated
6036	21817	chr2	158116405	158117951	-	1547	Tgm2	protein-coding	-0.343194	-4.31665	4.17e-05	0.00264148	down-regulated
6335.14	22288	chr10	12455363	12455564	-	202	Utrn	protein-coding	0.518797	4.14678	4.25e-05	0.00267813	down-regulated
458	12162	chr2	172869686	172870286	-	601	Bmp7	protein-coding	0.826006	4.60313	4.3e-05	0.00270112	down-regulated
458.6	12162	chr2	172939655	172940293	-	639	Bmp7	protein-coding	-0.826006	-4.60313	4.3e-05	0.00270112	down-regulated
29682.1	228880	chr2	165827129	165828689	-	1561	Zmynd8	protein-coding	-0.254246	-4.24045	4.34e-05	0.00271847	down-regulated
16586	72543	chr2	33729956	33733531	-	3576	Mvb12b	protein-coding	-1.47518	-4.59932	4.35e-05	0.00272086	down-regulated
16586.8	72543	chr2	33874338	33874460	-	123	Mvb12b	protein-coding	1.47518	4.59932	4.35e-05	0.00272086	down-regulated
16249.1	71972	chr19	43901070	43903058	-	1989	Dnmbp	protein-coding	-0.485352	-4.31766	4.42e-05	0.00275546	down-regulated
4143	18763	chr17	24549950	24550477	+	528	Pkd1	protein-coding	0.723877	4.21647	4.51e-05	0.00280707	down-regulated
6265.1	22184	chrX	163958274	163958666	-	393	Zrsr2	protein-coding	-0.47897	-4.35427	4.52e-05	0.00280707	down-regulated
24587	109685	chr9	107581296	107581336	+	41	Hyal3	protein-coding	-1.66766	-4.55517	4.99e-05	0.00306246	down-regulated
24587.1	109685	chr9	107584752	107585665	+	914	Hyal3	protein-coding	1.66766	4.55517	4.99e-05	0.00306246	down-regulated
4143.12	18763	chr17	24571521	24571696	+	176	Pkd1	protein-coding	0.944594	4.18471	5.11e-05	0.00311897	down-regulated
14416	68794	chr6	29433153	29433813	+	661	Flnc	protein-coding	-0.70603	-4.21277	5.15e-05	0.00313619	down-regulated
17546.2	74108	chr16	13654449	13654593	-	145	Parn	protein-coding	1.05159	4.37781	5.16e-05	0.00313876	down-regulated
29221.2	224273	chr16	59554107	59555752	-	1646	Crybg3	protein-coding	-0.744786	-4.53908	5.25e-05	0.00318498	down-regulated
29221	224273	chr16	59490775	59493685	-	2911	Crybg3	protein-coding	0.744786	4.53908	5.25e-05	0.00318498	down-regulated
9515	56441	chr9	107580170	107580935	+	766	Nat6	protein-coding	-0.595349	-4.53181	5.37e-05	0.00323466	down-regulated
9515.1	56441	chr9	107582817	107584048	+	1232	Nat6	protein-coding	0.595349	4.53181	5.37e-05	0.00323466	down-regulated
34126.7	320661	chr5	36672748	36673242	-	495	D5Ertd579e	protein-coding	0.726269	4.45191	5.52e-05	0.00330448	down-regulated
3184.14	16978	chr1	91105127	91105297	+	171	Lrrfip1	protein-coding	-0.779755	-4.29612	5.56e-05	0.00332731	down-regulated
13888.2	67867	chr7	67531615	67531790	-	176	Lrrc28	protein-coding	-0.601426	-4.26912	5.66e-05	0.00337266	down-regulated
23541.2	107823	chr5	33894906	33897966	+	3061	Whsc1	protein-coding	0.355319	4.15	5.85e-05	0.00347293	down-regulated
4015	18571	chr9	113651744	113655107	-	3364	Pdcd6ip	protein-coding	0.374331	4.16454	5.99e-05	0.00354155	down-regulated
27407.1	117146	chr5	114399790	114399967	+	178	Ube3b	protein-coding	0.837881	4.16382	6e-05	0.00354823	down-regulated
13597.6	67455	chrX	23315130	23315201	-	72	Klhl13	protein-coding	0.900289	4.2427	6.22e-05	0.00365486	down-regulated
28383.5	211978	chr12	79239857	79240056	-	200	Zfyve26	protein-coding	-0.897995	-4.10408	6.47e-05	0.00378145	down-regulated
4269.1	19043	chr17	85023696	85023992	+	297	Ppm1b	protein-coding	0.913295	4.24978	6.56e-05	0.00381794	down-regulated
12796.1	66317	chr9	54734369	54734528	-	160	Wdr61	protein-coding	-1.10146	-4.20703	6.62e-05	0.00385239	down-regulated
4269.7	19043	chr17	85013566	85014776	+	1211	Ppm1b	protein-coding	-0.295227	-4.24542	6.66e-05	0.0038663	down-regulated
22870	104718	chr12	100300770	100301770	-	1001	Ttc7b	protein-coding	0.386096	4.13247	6.77e-05	0.00391651	down-regulated
1888.13	14534	chr11	100710722	100710903	-	182	Kat2a	protein-coding	0.719662	4.12793	6.88e-05	0.00397789	down-regulated
14048.1	68108	chr2	158357198	158357263	-	66	Snhg17	ncRNA	-0.955039	-4.28033	7.19e-05	0.00412823	down-regulated
22347.2	102632	chr9	104126582	104127646	+	1065	Acad11	protein-coding	0.304075	4.0967	7.75e-05	0.00437699	down-regulated
29682.2	228880	chr2	165842764	165842877	-	114	Zmynd8	protein-coding	-0.681937	-4.08865	7.77e-05	0.0043829	down-regulated
4873	19876	chr16	72663149	72664194	+	1046	Robo1	protein-coding	-0.487244	-4.1461	7.82e-05	0.00440063	down-regulated
29006.3	218232	chr13	48585932	48587178	-	1247	Ptpdc1	protein-coding	-0.588968	-4.33166	8.13e-05	0.00456236	down-regulated
5368.34	20742	chr11	30197724	30198257	-	534	Sptbn1	protein-coding	0.430018	4.00859	8.18e-05	0.00458588	down-regulated
1716.14	14218	chr19	47464064	47464411	-	348	Sh3pxd2a	protein-coding	0.681142	4.18538	8.23e-05	0.00460598	down-regulated
115.8	11569	chr6	140650756	140655481	+	4726	Aebp2	protein-coding	0.23447	4.15261	8.59e-05	0.0047527	down-regulated
15685.5	71069	chr8	47352031	47352348	-	318	Stox2	protein-coding	-1.09193	-4.26448	8.63e-05	0.00476807	down-regulated
34135	320678	chr6	125145241	125146029	+	789	Iffo1	protein-coding	-0.53894	-4.25561	8.88e-05	0.00486628	down-regulated
9110	54132	chr19	40222239	40222771	-	533	Pdlim1	protein-coding	-0.389244	-4.20313	9.34e-05	0.00506871	down-regulated
33222.4	286940	chr14	7950305	7951588	+	1284	Flnb	protein-coding	0.166506	3.95151	9.71e-05	0.00522617	down-regulated
32963	269682	chr5	110176701	110176922	+	222	Golga3	protein-coding	0.754942	4.00125	0.000101285	0.00541825	down-regulated
21561.8	97820	chr13	54565182	54565382	-	201	4833439L19Rik	protein-coding	-0.622665	-4.0997	0.000103543	0.00552612	down-regulated
3279.23	17159	chr8	85097402	85098739	+	1338	Man2b1	protein-coding	0.310172	3.9649	0.00010913	0.00577466	down-regulated
14582.1	69116	chr4	139489167	139489533	+	367	Ubr4	protein-coding	-0.397706	-3.89313	0.000110602	0.00582552	down-regulated
3631.38	17925	chr8	71359325	71359452	+	128	Myo9b	protein-coding	-0.49694	-3.93199	0.000113905	0.00596277	down-regulated
22974.6	105352	chr13	30708677	30710459	+	1783	Dusp22	protein-coding	-1.0196	-4.28168	0.000115943	0.00605553	down-regulated
22974.7	105352	chr13	30710706	30711225	+	520	Dusp22	protein-coding	1.0196	4.28168	0.000115943	0.00605553	down-regulated
28480	213109	chr1	30802342	30805942	-	3601	Phf3	protein-coding	-0.179665	-3.9776	0.000120909	0.00626703	down-regulated
16522.1	72399	chr5	121685129	121687248	+	2120	Brap	protein-coding	-0.338255	-4.03602	0.00012233	0.00632628	down-regulated
28952	217695	chr12	83546941	83548115	-	1175	Zfyve1	protein-coding	0.319479	4.01117	0.0001272	0.00649945	down-regulated
16299	72050	chr1	44106546	44107104	-	559	Kdelc1	protein-coding	0.693342	4.02517	0.000143537	0.00723963	down-regulated
3250.8	17127	chr9	63757472	63757994	-	523	Smad3	protein-coding	0.468914	4.05198	0.000154884	0.00770104	down-regulated
3375.6	17304	chr7	79143278	79143388	-	111	Mfge8	protein-coding	0.646941	3.94624	0.000160236	0.00792683	down-regulated
24174	108800	chr12	91633009	91639805	-	6797	Ston2	protein-coding	-0.369967	-4.0312	0.000165925	0.00818454	down-regulated
1378.3	13521	chr18	61211398	61211596	-	199	Slc26a2	protein-coding	1.05701	4.0611	0.000167706	0.00826647	down-regulated
3783	18160	chr3	90450592	90451182	-	591	Npr1	protein-coding	0.354585	3.89627	0.000177467	0.00866637	down-regulated
20735.2	83997	chr14	26482819	26482966	-	148	Slmap	protein-coding	-0.583388	-3.88125	0.000181568	0.00884136	down-regulated
28876.9	217154	chr11	98043480	98043786	-	307	Stac2	protein-coding	1.0814	4.07782	0.000181904	0.00884512	down-regulated
1346	13476	chr18	34344885	34347168	-	2284	Reep5	protein-coding	0.391869	4.00307	0.000182082	0.0088475	down-regulated
8.14	11307	chr17	31114057	31117984	+	3928	Abcg1	protein-coding	0.37237	3.91715	0.000185768	0.00899272	down-regulated
3278.4	17158	chr17	64651196	64651323	+	128	Man2a1	protein-coding	-0.9842	-3.84481	0.00018845	0.00909872	down-regulated
13175.2	66863	chr16	17525677	17526330	+	654	Lztr1	protein-coding	0.36901	3.84347	0.000193229	0.00928356	down-regulated
19075.5	76484	chr7	139910209	139910945	+	737	Kndc1	protein-coding	-1.07779	-4.04812	0.000199649	0.00956513	down-regulated
13459	67269	chr13	59449535	59450314	-	780	Agtpbp1	protein-coding	0.509006	3.87213	0.000200143	0.00958206	down-regulated
34355.2	321022	chr9	103359876	103360018	-	143	Cdv3	protein-coding	-0.951115	-3.94352	0.00020371	0.00967155	down-regulated
34087	320595	chrX	151520672	151521437	+	766	Phf8	protein-coding	0.791467	3.88442	0.000208152	0.00985938	down-regulated
29671.8	228836	chr2	156721279	156722102	+	824	Dlgap4	protein-coding	-0.836356	-3.93655	0.000208509	0.00986516	down-regulated
7543.9	27999	chr6	22355995	22356081	-	87	Fam3c	protein-coding	0.955968	3.98414	0.000214908	0.0100911	down-regulated
28149.2	208727	chr1	92148256	92148393	-	138	Hdac4	protein-coding	0.806593	3.87053	0.000218405	0.0102112	down-regulated
14028.5	68070	chr15	12372447	12376380	-	3934	Pdzd2	protein-coding	-0.435548	-3.94429	0.000220899	0.0102876	down-regulated
5852.13	21343	chr5	138184332	138184547	-	216	Taf6	protein-coding	-0.371992	-3.84197	0.000222588	0.0103592	down-regulated
8185.4	52132	chr7	25718918	25719053	-	136	Ccdc97	protein-coding	1.19832	3.9416	0.000222852	0.0103645	down-regulated
30240.2	233552	chr7	99459959	99460984	+	1026	Gdpd5	protein-coding	-0.947989	-4.06014	0.000227072	0.0105035	down-regulated
30240	233552	chr7	99381549	99382208	+	660	Gdpd5	protein-coding	0.947989	4.06014	0.000227072	0.0105035	down-regulated
534.13	12305	chr17	35691447	35691594	-	148	Ddr1	protein-coding	-0.941166	-3.81484	0.000230219	0.0106347	down-regulated
5151.6	20444	chr8	110970102	110972497	+	2396	St3gal2	protein-coding	0.455137	3.95802	0.000233671	0.0107506	down-regulated
9297.4	55991	chr9	15044857	15045478	-	622	Panx1	protein-coding	0.555097	3.92539	0.000234987	0.0107935	down-regulated
13609.6	67469	chr9	122379513	122381523	+	2011	Abhd5	protein-coding	0.38382	3.89766	0.00025724	0.011665	down-regulated
12796	66317	chr9	54717155	54717435	-	281	Wdr61	protein-coding	0.316449	3.82027	0.000259719	0.0117281	down-regulated
14660	69259	chr17	24047720	24049444	-	1725	Kctd5	protein-coding	-0.462425	-3.92382	0.000260642	0.0117541	down-regulated
5071	20338	chr12	91806043	91810053	-	4011	Sel1l	protein-coding	-0.301748	-3.79627	0.000261212	0.0117643	down-regulated
30743.7	239102	chr14	55072547	55073064	-	518	Zfhx2	protein-coding	0.668801	3.88871	0.000264848	0.0118968	down-regulated
6942.12	27015	chr13	96516639	96516758	-	120	Polk	protein-coding	-0.885299	-3.76834	0.000271413	0.0121597	down-regulated
40467	654820	chrX	169975043	169976790	-	1748	G530011O06Rik	ncRNA	-1.17121	-3.98465	0.000284794	0.0126596	down-regulated
40467.1	654820	chrX	169978286	169978917	-	632	G530011O06Rik	ncRNA	1.17121	3.98465	0.000284794	0.0126596	down-regulated
1888.1	14534	chr11	100709076	100709177	-	102	Kat2a	protein-coding	-0.829296	-3.74108	0.000285148	0.0126672	down-regulated
5274	20618	chr14	34370274	34370565	-	292	Sncg	protein-coding	-0.579332	-3.92796	0.00029018	0.0128656	down-regulated
1888.5	14534	chr11	100706350	100706493	-	144	Kat2a	protein-coding	-0.662228	-3.73071	0.000295838	0.0130656	down-regulated
1553.2	13924	chr1	135109286	135109449	-	164	Ptprv	protein-coding	0.619146	3.70352	0.000296243	0.0130751	down-regulated
3610.1	17886	chr15	77762952	77763124	-	173	Myh9	protein-coding	0.317336	3.66658	0.000299077	0.0131831	down-regulated
14028	68070	chr15	12357054	12362239	-	5186	Pdzd2	protein-coding	0.432441	3.83261	0.000317683	0.0138484	down-regulated
34768.5	330662	chr7	135172447	135173647	+	1201	Dock1	protein-coding	0.650387	3.78856	0.000319745	0.0138964	down-regulated
35246.1	380614	chr3	40692499	40692969	+	471	Intu	protein-coding	-0.757703	-3.83708	0.0003432	0.0146647	down-regulated
15450.2	70661	chr9	46222069	46224194	+	2126	Sik3	protein-coding	-0.472166	-3.69755	0.000347818	0.014825	down-regulated
9184.2	54399	chr7	140855074	140855165	-	92	Bet1l	protein-coding	-0.854608	-3.86718	0.000350006	0.0148811	down-regulated
9221.1	54610	chr1	39373727	39373824	-	98	Tbc1d8	protein-coding	0.764849	3.67107	0.000352169	0.0149356	down-regulated
23238.7	106877	chr18	61741630	61741841	-	212	Afap1l1	protein-coding	-0.901947	-3.80046	0.000352379	0.0149356	down-regulated
20456.1	78908	chr3	101377806	101378492	+	687	Igsf3	protein-coding	0.453702	3.71692	0.000355569	0.0150521	down-regulated
16358.5	72145	chr5	101929881	101930095	-	215	Wdfy3	protein-coding	-0.929695	-3.63189	0.000371491	0.0156583	down-regulated
6862.3	26558	chr8	70285931	70286062	+	132	Homer3	protein-coding	-0.618243	-3.72003	0.000381622	0.016026	down-regulated
7001	27277	chr12	102469134	102469363	+	230	Golga5	protein-coding	0.865119	3.67786	0.000382116	0.0160369	down-regulated
6335.11	22288	chr10	12439627	12439793	-	167	Utrn	protein-coding	0.530902	3.58482	0.000385884	0.0161752	down-regulated
12796.3	66317	chr9	54722834	54722927	-	94	Wdr61	protein-coding	-0.634516	-3.69883	0.000392508	0.0163825	down-regulated
829	12751	chr7	105744847	105746772	-	1926	Tpp1	protein-coding	0.363532	3.6865	0.000394347	0.0164493	down-regulated
15951.1	71492	chr3	36610180	36610355	-	176	Bbs7	protein-coding	1.20548	3.76449	0.000395502	0.0164874	down-regulated
1015.7	13003	chr13	89688285	89693501	-	5217	Vcan	protein-coding	-0.347932	-3.73888	0.000400107	0.016619	down-regulated
29615.4	228140	chr2	85058126	85059487	+	1362	Tnks1bp1	protein-coding	0.412047	3.76034	0.000400791	0.0166368	down-regulated
77.3	11513	chr8	88327672	88329962	+	2291	Adcy7	protein-coding	-0.913405	-3.86153	0.000410819	0.0169809	down-regulated
77.6	11513	chr8	88306350	88306770	+	421	Adcy7	protein-coding	0.913405	3.86153	0.000410819	0.0169809	down-regulated
14008	68038	chr7	141493136	141496146	-	3011	Chid1	protein-coding	-0.421653	-3.71238	0.000411454	0.0169969	down-regulated
324.1	11906	chr8	108792202	108794969	+	2768	Zfhx3	protein-coding	0.454908	3.74822	0.000416626	0.0171639	down-regulated
4437.25	19280	chr17	56435610	56436191	-	582	Ptprs	protein-coding	-0.358477	-3.58435	0.000424003	0.0174101	down-regulated
23248	106952	chr18	37972623	37973651	-	1029	Arap3	protein-coding	0.967916	3.84259	0.000434477	0.0177019	down-regulated
23248.3	106952	chr18	37996586	37997123	-	538	Arap3	protein-coding	-0.967916	-3.84259	0.000434477	0.0177019	down-regulated
324.8	11906	chr8	108946317	108951770	+	5454	Zfhx3	protein-coding	-0.473943	-3.73165	0.000439263	0.0178441	down-regulated
20975.5	93686	chr15	77097940	77098084	-	145	Rbfox2	protein-coding	-0.506114	-3.69058	0.00044201	0.017915	down-regulated
14582.3	69116	chr4	139418402	139418590	+	189	Ubr4	protein-coding	-0.53109	-3.53336	0.000443378	0.017947	down-regulated
4176.2	18803	chr2	160747775	160747927	+	153	Plcg1	protein-coding	-0.427263	-3.57439	0.000456283	0.0183606	down-regulated
3783.16	18160	chr3	90461365	90461500	-	136	Npr1	protein-coding	-0.948249	-3.62059	0.00046502	0.0186682	down-regulated
1888.15	14534	chr11	100711333	100711478	-	146	Kat2a	protein-coding	0.77135	3.60067	0.000466541	0.0186995	down-regulated
18549.4	75547	chr7	75750574	75754609	+	4036	Akap13	protein-coding	-0.301296	-3.60062	0.000466619	0.0186995	down-regulated
2421.1	15467	chr5	143873751	143873884	+	134	Eif2ak1	protein-coding	0.761712	3.64156	0.000475573	0.0190249	down-regulated
29301.1	225028	chr17	80613915	80614027	-	113	Map4k3	protein-coding	0.848657	3.66722	0.00047715	0.0190656	down-regulated
28870.1	217127	chr11	95306049	95306196	-	148	Kat7	protein-coding	0.324771	3.5962	0.000483035	0.0192333	down-regulated
18028.4	74772	chr4	140993948	140994062	+	115	Atp13a2	protein-coding	0.706596	3.57873	0.000486968	0.0193441	down-regulated
29682.8	228880	chr2	165807519	165807929	-	411	Zmynd8	protein-coding	0.391755	3.5828	0.000487748	0.0193534	down-regulated
3967.24	18484	chr1	97976857	97977259	-	403	Pam	protein-coding	0.713477	3.69813	0.000488687	0.0193794	down-regulated
7037.13	27387	chr2	32754396	32755007	+	612	Sh2d3c	protein-coding	-1.0404	-3.79829	0.000495105	0.019532	down-regulated
7037.8	27387	chr2	32749153	32749685	+	533	Sh2d3c	protein-coding	1.0404	3.79829	0.000495105	0.019532	down-regulated
29682.1	228880	chr2	165833309	165833424	-	116	Zmynd8	protein-coding	-0.809203	-3.57691	0.000497797	0.0196155	down-regulated
1263	13346	chr1	75360344	75360992	+	649	Des	protein-coding	1.09036	3.6508	0.000503426	0.0197917	down-regulated
14008.1	68038	chr7	141532819	141532973	-	155	Chid1	protein-coding	0.734433	3.65056	0.000503821	0.0197958	down-regulated
20591.5	80907	chr9	66975041	66975484	-	444	Lactb	protein-coding	-0.432329	-3.6883	0.000504154	0.0197975	down-regulated
9221.2	54610	chr1	39374082	39374171	-	90	Tbc1d8	protein-coding	0.759092	3.56622	0.000508593	0.0199375	down-regulated
30393	234889	chr9	3532349	3533099	+	751	Gucy1a2	protein-coding	0.689654	3.70751	0.000514953	0.0200946	down-regulated
12562.3	65247	chr1	91546928	91547230	+	303	Asb1	protein-coding	0.499092	3.70264	0.000522814	0.0202776	down-regulated
29422.2	226251	chr19	57118752	57119009	-	258	Ablim1	protein-coding	0.892136	3.73514	0.00052377	0.0202996	down-regulated
27468.7	117589	chr7	66689100	66689561	-	462	Asb7	protein-coding	0.581616	3.69403	0.000536961	0.0207169	down-regulated
28630.1	214897	chr9	66039577	66045014	+	5438	Csnk1g1	protein-coding	-0.353423	-3.61665	0.00053749	0.0207256	down-regulated
12854.6	66395	chr19	9076576	9076919	+	344	Ahnak	protein-coding	0.546505	3.64654	0.000539194	0.0207562	down-regulated
31211	244059	chr7	73426652	73430000	-	3349	Chd2	protein-coding	-0.233774	-3.51604	0.000552102	0.021146	down-regulated
2415.6	15460	chr14	70561812	70561976	+	165	Hr	protein-coding	-0.820199	-3.63144	0.00056594	0.0215432	down-regulated
1295.14	13400	chr7	19092950	19093821	+	872	Dmpk	protein-coding	-0.881173	-3.67583	0.000568103	0.0216087	down-regulated
14577.4	69104	chr19	37220639	37221076	+	438	2017-03-05	protein-coding	-0.338292	-3.62701	0.00057402	0.0217178	down-regulated
28952.1	217695	chr12	83594398	83595322	-	925	Zfyve1	protein-coding	-0.276055	-3.57339	0.000576809	0.0217871	down-regulated
4437.3	19280	chr17	56454874	56455019	-	146	Ptprs	protein-coding	-0.743631	-3.49734	0.00057825	0.0218182	down-regulated
16608.2	72584	chrX	38564933	38565106	-	174	Cul4b	protein-coding	-0.309539	-3.52667	0.000583087	0.0219163	down-regulated
16306.1	72061	chr13	63298712	63299656	+	945	2010111I01Rik	protein-coding	0.51024	3.69966	0.000583113	0.0219163	down-regulated
4203	18854	chr9	58217179	58220569	-	3391	Pml	protein-coding	0.259511	3.58833	0.00058978	0.0221303	down-regulated
6808.29	26408	chr10	20141523	20142750	+	1228	Map3k5	protein-coding	-0.541653	-3.58664	0.000593033	0.0222158	down-regulated
17752	74388	chr9	65032458	65032623	+	166	Dpp8	protein-coding	-0.907879	-3.55566	0.000594507	0.0222589	down-regulated
7727.6	29820	chr14	61005075	61005253	-	179	Tnfrsf19	protein-coding	-0.720566	-3.62941	0.000607159	0.022604	down-regulated
19642	77573	chr5	123528757	123531221	-	2465	Vps33a	protein-coding	0.253578	3.55038	0.000622624	0.0230091	down-regulated
6577.1	23807	chr9	108605334	108605417	-	84	Arih2	protein-coding	-0.949118	-3.52778	0.000636496	0.0234092	down-regulated
23007	105450	chr14	34375504	34375778	+	275	Mmrn2	protein-coding	0.391006	3.58742	0.000651287	0.023811	down-regulated
534.16	12305	chr17	35693788	35693917	-	130	Ddr1	protein-coding	-0.849436	-3.50994	0.000661094	0.0240537	down-regulated
29187.2	223978	chr16	11887578	11887796	-	219	Cpped1	protein-coding	-0.512518	-3.65736	0.000662317	0.0240854	down-regulated
6335.5	22288	chr10	12406436	12406594	-	159	Utrn	protein-coding	0.469398	3.43507	0.000664569	0.0241417	down-regulated
7893.1	50754	chr3	84969165	84969301	+	137	Fbxw7	protein-coding	-0.60423	-3.51459	0.000681743	0.0246346	down-regulated
20456.8	78908	chr3	101455105	101455512	+	408	Igsf3	protein-coding	-0.526064	-3.51864	0.000691509	0.02496	down-regulated
6577.14	23807	chr9	108644933	108644994	-	62	Arih2	protein-coding	-0.656779	-3.5027	0.000692201	0.02496	down-regulated
29757	229681	chr3	104864506	104865574	+	1069	St7l	protein-coding	0.65573	3.68113	0.000697525	0.025112	down-regulated
29757.1	229681	chr3	104926430	104930064	+	3635	St7l	protein-coding	-0.65573	-3.68113	0.000697525	0.025112	down-regulated
20980.3	93691	chr1	64120900	64121389	-	490	Klf7	protein-coding	0.625731	3.67205	0.000716174	0.0256483	down-regulated
20980.2	93691	chr1	64078707	64079334	-	628	Klf7	protein-coding	-0.625731	-3.67205	0.000716174	0.0256483	down-regulated
1716.7	14218	chr19	47314035	47314166	-	132	Sh3pxd2a	protein-coding	-0.811207	-3.5343	0.000733515	0.0260375	down-regulated
28383.2	211978	chr12	79268359	79269101	-	743	Zfyve26	protein-coding	0.402825	3.43326	0.000760208	0.0267569	down-regulated
1888.9	14534	chr11	100708846	100708985	-	140	Kat2a	protein-coding	-0.666946	-3.45737	0.000760832	0.0267571	down-regulated
4873.24	19876	chr16	73024132	73024538	+	407	Robo1	protein-coding	0.551492	3.48705	0.000767175	0.0269386	down-regulated
27407.2	117146	chr5	114406746	114406860	+	115	Ube3b	protein-coding	-0.814132	-3.45336	0.000771178	0.0270653	down-regulated
279	11841	chr11	103966871	103967377	+	507	Arf2	protein-coding	0.893521	3.55273	0.000771638	0.0270675	down-regulated
15792.2	71228	chr14	24166161	24166293	-	133	Dlg5	protein-coding	-1.072	-3.42392	0.000784957	0.0274082	down-regulated
17647.2	74244	chr6	114858991	114860614	+	1624	Atg7	protein-coding	-0.593463	-3.54464	0.000791272	0.0276005	down-regulated
20298	78611	chr4	117119218	117120861	-	1644	Btbd19	ncRNA	0.286017	3.51884	0.00080912	0.0280785	down-regulated
27407.2	117146	chr5	114407544	114407643	+	100	Ube3b	protein-coding	-0.7274	-3.43717	0.000814243	0.0281691	down-regulated
2421	15467	chr5	143871862	143872021	+	160	Eif2ak1	protein-coding	0.436488	3.47457	0.000823609	0.0284095	down-regulated
14660.5	69259	chr17	24073177	24073485	-	309	Kctd5	protein-coding	0.471265	3.55176	0.000831387	0.0285625	down-regulated
7751.2	29858	chr15	81952725	81952800	-	76	Pmm1	protein-coding	-0.860296	-3.48192	0.000832661	0.0285728	down-regulated
1725	14230	chr11	100415694	100416025	+	332	Fkbp10	protein-coding	0.765107	3.46315	0.000854649	0.0291553	down-regulated
3147.1	16886	chr11	3346235	3346392	-	158	Limk2	protein-coding	0.337576	3.43862	0.000856155	0.0291643	down-regulated
8504.3	52696	chr10	72656530	72656696	+	167	Zwint	protein-coding	0.301596	3.51292	0.000872981	0.0296194	down-regulated
5852.2	21343	chr5	138179780	138179953	-	174	Taf6	protein-coding	0.350816	3.43886	0.000875125	0.029648	down-regulated
3499	17702	chr13	53466881	53468593	-	1713	Msx2	protein-coding	-0.651973	-3.59585	0.000892893	0.030145	down-regulated
3499.1	17702	chr13	53472332	53472780	-	449	Msx2	protein-coding	0.651973	3.59585	0.000892893	0.030145	down-regulated
29171	223827	chr15	93239742	93245129	-	5388	Gxylt1	protein-coding	0.360379	3.50424	0.000896694	0.0301992	down-regulated
16299.4	72050	chr1	44112645	44112882	-	238	Kdelc1	protein-coding	-0.558659	-3.47071	0.000898127	0.0302177	down-regulated
2932.11	16574	chr2	49722977	49723149	+	173	Kif5c	protein-coding	0.613412	3.43701	0.000903241	0.03033	down-regulated
6335.41	22288	chr10	12678580	12678750	-	171	Utrn	protein-coding	-0.542869	-3.34775	0.000904538	0.0303586	down-regulated
4455.3	19303	chr5	115545372	115545508	+	137	Pxn	protein-coding	-0.634825	-3.43453	0.00091056	0.0305457	down-regulated
16249.1	71972	chr19	43874827	43875020	-	194	Dnmbp	protein-coding	0.624018	3.43507	0.000935682	0.0312505	down-regulated
12918	66482	chr13	30813918	30815391	-	1474	Exoc2	protein-coding	0.38092	3.44277	0.000943817	0.0313995	down-regulated
6335.43	22288	chr10	12682277	12682450	-	174	Utrn	protein-coding	-0.548403	-3.33261	0.000953585	0.0316613	down-regulated
31070.9	242669	chr4	128962084	128962204	-	121	Azin2	protein-coding	-0.431412	-3.41969	0.000955425	0.0316624	down-regulated
1888.16	14534	chr11	100711813	100711936	-	124	Kat2a	protein-coding	0.894204	3.38839	0.000958055	0.031693	down-regulated
12562.5	65247	chr1	91554751	91559590	+	4840	Asb1	protein-coding	-0.356049	-3.50278	0.000964541	0.0318872	down-regulated
9336.3	56070	chr18	42523893	42524352	+	460	Tcerg1	protein-coding	0.328553	3.38596	0.000981049	0.0322149	down-regulated
6335.5	22288	chr10	12697989	12698144	-	156	Utrn	protein-coding	-0.790445	-3.31729	0.00100571	0.0327416	down-regulated
31471.1	246293	chr5	103864202	103864403	-	202	Klhl8	protein-coding	-0.579358	-3.41513	0.00107013	0.0344128	down-regulated
9551.1	56494	chr11	103683792	103683932	-	141	Gosr2	protein-coding	0.494518	3.46113	0.00109353	0.0350499	down-regulated
16790.6	72960	chr15	75667420	75667605	-	186	Top1mt	protein-coding	-0.761434	-3.39251	0.00110714	0.035337	down-regulated
6335.55	22288	chr10	12714133	12714374	-	242	Utrn	protein-coding	-0.46963	-3.28851	0.00111087	0.0354231	down-regulated
9551	56494	chr11	103676849	103679397	-	2549	Gosr2	protein-coding	-0.348737	-3.45553	0.00111209	0.0354287	down-regulated
29577.3	227723	chr2	32230611	32234537	+	3927	Prrc2b	protein-coding	0.241072	3.3038	0.00113464	0.0359453	down-regulated
6862.4	26558	chr8	70289394	70289501	+	108	Homer3	protein-coding	-0.964022	-3.38291	0.00114121	0.036054	down-regulated
30086.2	232341	chr6	119962397	119963632	-	1236	Wnk1	protein-coding	-0.434414	-3.29608	0.00117075	0.0368002	down-regulated
7727.1	29820	chr14	61046115	61046855	-	741	Tnfrsf19	protein-coding	-0.78338	-3.40381	0.00121965	0.0380054	down-regulated
30287.1	233905	chr7	127878570	127883918	+	5349	Zfp646	protein-coding	0.434344	3.48639	0.00122179	0.0380373	down-regulated
30287	233905	chr7	127877701	127878107	+	407	Zfp646	protein-coding	-0.434344	-3.48639	0.00122179	0.0380373	down-regulated
29402.1	226101	chr19	37901237	37901384	-	148	Myof	protein-coding	0.348025	3.26619	0.00122919	0.0381634	down-regulated
6051.1	21833	chr11	98753290	98753638	+	349	Thra	protein-coding	-0.645778	-3.38224	0.00123782	0.0383792	down-regulated
13459.5	67269	chr13	59474532	59474712	-	181	Agtpbp1	protein-coding	0.667391	3.32909	0.00124893	0.0386886	down-regulated
24147	108657	chr1	92910825	92911483	+	659	Rnpepl1	protein-coding	-0.58926	-3.32716	0.00125668	0.038858	down-regulated
9175.12	54387	chr10	76489868	76490067	+	200	Mcm3ap	protein-coding	-0.242304	-3.26976	0.00128578	0.039579	down-regulated
20975.1	93686	chr15	77153530	77153812	-	283	Rbfox2	protein-coding	-0.708861	-3.34338	0.00133842	0.0407468	down-regulated
28649.9	215051	chr9	46298415	46298783	+	369	Bud13	protein-coding	-0.304984	-3.33565	0.00137083	0.0415607	down-regulated
33425	319475	chr11	58315114	58317534	-	2421	Zfp672	protein-coding	-0.689177	-3.40727	0.0013876	0.0419389	down-regulated
31038.1	242466	chr4	55080666	55083563	+	2898	Zfp462	protein-coding	0.273016	3.28196	0.00139932	0.0421968	down-regulated
3080.2	16776	chr2	180177103	180177193	-	91	Lama5	protein-coding	0.678925	3.21403	0.00139983	0.0421968	down-regulated
9475.13	56381	chr4	141516836	141517318	-	483	Spen	protein-coding	-0.467258	-3.32825	0.00140255	0.0422414	down-regulated
14346.3	68659	chr3	79941295	79946278	+	4984	Fam198b	protein-coding	0.325366	3.3756	0.00141171	0.0424575	down-regulated
13335	67087	chr4	149518241	149518379	+	139	Ctnnbip1	protein-coding	0.781611	3.40085	0.00141374	0.0424849	down-regulated
27468.1	117589	chr7	66659650	66660255	-	606	Asb7	protein-coding	-0.406818	-3.37189	0.00142733	0.0427055	down-regulated
16553	72479	chr4	59581563	59581775	+	213	Hsdl2	protein-coding	1.05457	3.30192	0.00142871	0.0427103	down-regulated
5151.1	20444	chr8	110956758	110958050	+	1293	St3gal2	protein-coding	-0.401665	-3.37156	0.00142874	0.0427103	down-regulated
14299.4	68553	chr9	106079945	106080547	-	603	Col6a4	protein-coding	0.793844	3.29027	0.00144522	0.04309	down-regulated
12536.2	64930	chr2	28686654	28691167	+	4514	Tsc1	protein-coding	-0.305915	-3.27058	0.00145135	0.0432352	down-regulated
24294.4	109294	chr1	11265969	11266159	+	191	Prex2	protein-coding	-0.77201	-3.30117	0.00147426	0.0436548	down-regulated
13445.4	67247	chr1	184832576	184832716	-	141	2017-03-02	protein-coding	-0.391824	-3.31898	0.00150229	0.0443085	down-regulated
5970.1	21664	chr10	111508060	111508649	+	590	Phlda1	protein-coding	0.505969	3.41163	0.00151013	0.0444248	down-regulated
5970	21664	chr10	111506286	111507648	+	1363	Phlda1	protein-coding	-0.505969	-3.41163	0.00151013	0.0444248	down-regulated
30608.4	237500	chr10	100457048	100457159	-	112	Tmtc3	protein-coding	-0.845579	-3.25061	0.00152406	0.0447011	down-regulated
6335.3	22288	chr10	12402883	12402991	-	109	Utrn	protein-coding	0.657311	3.19406	0.00153207	0.0449156	down-regulated
9510.3	56434	chr9	56146514	56146615	-	102	Tspan3	protein-coding	-0.610438	-3.3266	0.00153995	0.0450839	down-regulated
27147.3	114863	chr8	27045924	27045999	+	76	Prosc	protein-coding	-0.617681	-3.31074	0.00154045	0.0450839	down-regulated
35387.1	381290	chr1	133732226	133732440	-	215	Atp2b4	protein-coding	0.662037	3.25565	0.00157766	0.0459289	down-regulated
13431.2	67226	chr10	115347032	115347286	-	255	Tmem19	protein-coding	0.416069	3.30256	0.00157919	0.0459289	down-regulated
5852.3	21343	chr5	138180891	138181016	-	126	Taf6	protein-coding	-0.414961	-3.25202	0.00159585	0.0463202	down-regulated
4143.45	18763	chr17	24595072	24596514	+	1443	Pkd1	protein-coding	-0.385219	-3.22064	0.00160215	0.0463344	down-regulated
1757.17	14270	chr1	131356690	131356905	-	216	Srgap2	protein-coding	-0.425732	-3.23396	0.00160752	0.0464503	down-regulated
2846.4	16453	chr8	71679202	71679347	+	146	Jak3	protein-coding	-0.882865	-3.20271	0.00164428	0.0473324	down-regulated
4175.9	18802	chr1	74557720	74557872	+	153	Plcd4	protein-coding	1.00054	3.36614	0.00171629	0.0490131	down-regulated
4175.4	18802	chr1	74549175	74549403	+	229	Plcd4	protein-coding	-1.00054	-3.36614	0.00171629	0.0490131	down-regulated
4143.42	18763	chr17	24594088	24594378	+	291	Pkd1	protein-coding	-0.710492	-3.19847	0.00172105	0.0490608	down-regulated
6335.9	22288	chr10	12421597	12421733	-	137	Utrn	protein-coding	0.636888	3.1581	0.00172809	0.0492063	down-regulated
3958	18472	chr11	74673949	74677742	-	3794	Pafah1b1	protein-coding	0.763858	12.7285	1.36e-21	5.49e-18	nochange
17557	74125	chr9	99478391	99480777	-	2387	Armc8	protein-coding	1.24977	13.1344	3.71e-21	1.27e-17	nochange
17557.1	74125	chr9	99518245	99520582	-	2338	Armc8	protein-coding	-1.13086	-11.1077	1.6e-17	2.54e-14	nochange
29076.6	219022	chr14	50775450	50777412	-	1963	Ttc5	protein-coding	-0.964871	-9.38524	5.79e-14	4.55e-11	nochange
4963.38	20185	chr11	62401377	62403462	-	2086	Ncor1	protein-coding	0.815916	7.71121	2.47e-13	1.71e-10	nochange
13356.7	67118	chr16	13702065	13703612	+	1548	Bfar	protein-coding	1.12733	8.92895	3.91e-13	2.49e-10	nochange
6576	23806	chr9	59388554	59393378	-	4825	Arih1	protein-coding	0.513942	7.77126	3.19e-11	1.33e-08	nochange
79	11515	chr16	4287545	4289089	-	1545	Adcy9	protein-coding	1.67728	8.87214	6.43e-11	2.4e-08	nochange
79.9	11515	chr16	4417853	4419587	-	1735	Adcy9	protein-coding	-1.67728	-8.87214	6.43e-11	2.4e-08	nochange
31116	243272	chr5	124368702	124374671	-	5970	Sbno1	protein-coding	0.309183	6.90849	6.75e-11	2.51e-08	nochange
7064	27416	chr16	20331303	20332705	-	1403	Abcc5	protein-coding	0.443526	6.89383	7.33e-11	2.67e-08	nochange
33685.1	319939	chr11	8492093	8493337	-	1245	Tns3	protein-coding	0.697048	7.02349	1.82e-10	5.76e-08	nochange
4406.6	19244	chr4	129847714	129850003	+	2290	Ptp4a2	protein-coding	0.448619	7.65694	2.5e-10	7.66e-08	nochange
3958.1	18472	chr11	74723200	74723858	-	659	Pafah1b1	protein-coding	-0.909589	-7.12207	2.87e-10	8.63e-08	nochange
18557.5	75560	chr5	110755397	110756766	-	1370	Ep400	protein-coding	-0.48732	-6.63746	2.9e-10	8.69e-08	nochange
13196	66890	chr13	55343833	55347037	-	3205	Lman2	protein-coding	0.385877	7.13129	5.19e-10	1.45e-07	nochange
1045	13047	chr5	136248135	136248980	-	846	Cux1	protein-coding	0.953041	6.88819	1.49e-09	3.75e-07	nochange
27024.1	114601	chr19	5717662	5720407	-	2746	Ehbp1l1	protein-coding	-1.21551	-7.33801	1.55e-09	3.89e-07	nochange
1891.2	14538	chr13	40917634	40918801	+	1168	Gcnt2	protein-coding	-0.742046	-7.33353	1.58e-09	3.94e-07	nochange
8312.11	52348	chr8	40546276	40551134	+	4859	Vps37a	protein-coding	0.752895	7.10887	2.05e-09	5.04e-07	nochange
9325	56044	chr13	17880575	17882501	-	1927	Rala	protein-coding	0.676677	6.62215	1.33e-08	2.69e-06	nochange
7552	28018	chr7	122067198	122067484	+	287	Ubfd1	protein-coding	1.1275	6.49637	1.48e-08	2.97e-06	nochange
1853.1	14430	chr4	41755961	41756130	+	170	Galt	protein-coding	1.0995	6.38824	2.27e-08	4.41e-06	nochange
27866.7	192174	chr8	47550695	47552837	+	2143	Rwdd4a	protein-coding	0.897347	6.53031	2.95e-08	5.54e-06	nochange
16568	72508	chr11	86499009	86502962	-	3954	Rps6kb1	protein-coding	0.626324	6.15278	3.39e-08	6.22e-06	nochange
4364.1	19185	chr3	95033482	95033546	-	65	Psmd4	protein-coding	-1.07117	-6.03369	5.59e-08	9.49e-06	nochange
4123.11	18738	chr11	75626117	75628778	+	2662	Pitpna	protein-coding	0.659157	6.1376	6.11e-08	1.02e-05	nochange
27279.3	116838	chr15	39681546	39684372	+	2827	Rims2	protein-coding	0.895309	6.03187	7.1e-08	1.17e-05	nochange
6477	22631	chr15	36770261	36772777	-	2517	Ywhaz	protein-coding	0.694291	6.14214	1.21e-07	1.9e-05	nochange
4133	18750	chr11	107933387	107939680	-	6294	Prkca	protein-coding	2.17011	6.36313	1.58e-07	2.41e-05	nochange
4133.16	18750	chr11	108343495	108343888	-	394	Prkca	protein-coding	-2.17011	-6.36313	1.58e-07	2.41e-05	nochange
18371	75302	chr12	3426857	3427212	+	356	Asxl2	protein-coding	-0.593782	-5.67748	2.05e-07	3.02e-05	nochange
28877	217166	chr11	98767935	98768419	-	485	Nr1d1	protein-coding	-0.932956	-5.95552	2.37e-07	3.43e-05	nochange
7827.4	30926	chr7	137459123	137459295	+	173	Glrx3	protein-coding	-1.61431	-5.83307	2.66e-07	3.8e-05	nochange
33661.1	319899	chr9	21812952	21813110	-	159	Dock6	protein-coding	1.315	5.32557	2.84e-07	4.01e-05	nochange
28698	215708	chr3	152273459	152276853	-	3395	Fam73a	protein-coding	0.628177	5.71453	3.2e-07	4.45e-05	nochange
22385.1	102857	chrX	73680960	73682502	+	1543	Slc6a8	protein-coding	0.399269	5.44888	3.36e-07	4.63e-05	nochange
51909	100502630	chr7	44986900	44987370	+	471	Gm15545	ncRNA	-1.3393	-6.10761	3.59e-07	4.84e-05	nochange
51909.1	100502630	chr7	44993983	44994601	+	619	Gm15545	ncRNA	1.3393	6.10761	3.59e-07	4.84e-05	nochange
13981.5	67996	chr2	162934412	162937121	+	2710	Srsf6	protein-coding	0.299564	5.67907	3.67e-07	4.9e-05	nochange
19001	76302	chr16	56015508	56017317	-	1810	Pcnp	protein-coding	1.66885	5.97123	5.56e-07	7.02e-05	nochange
19001.3	76302	chr16	56024224	56024438	-	215	Pcnp	protein-coding	-1.66885	-5.97123	5.56e-07	7.02e-05	nochange
12693	66177	chr9	20643318	20644893	+	1576	Ubl5	protein-coding	-1.11292	-5.70409	5.87e-07	7.37e-05	nochange
13439	67238	chr5	143548706	143549134	+	429	Fam220a	protein-coding	0.925845	5.93491	6.25e-07	7.73e-05	nochange
13439.2	67238	chr5	143562757	143564525	+	1769	Fam220a	protein-coding	-0.925845	-5.93491	6.25e-07	7.73e-05	nochange
16126.9	71795	chr11	107469891	107470720	-	830	Pitpnc1	protein-coding	-0.574537	-5.50644	9.02e-07	0.000105429	nochange
6059	21843	chr7	128439777	128442659	-	2883	Tial1	protein-coding	0.479145	5.27413	9.59e-07	0.000111472	nochange
15431	70616	chr8	70042813	70043080	+	268	Sugp1	protein-coding	0.803107	5.14645	1.15e-06	0.00013064	nochange
34915.2	338366	chr1	183356346	183359015	-	2670	Mia3	protein-coding	0.348455	5.13384	1.22e-06	0.000137158	nochange
7064.5	27416	chr16	20357369	20357558	-	190	Abcc5	protein-coding	0.546981	4.98895	1.34e-06	0.000148575	nochange
9124.23	54161	chr6	87912172	87913595	+	1424	Copg1	protein-coding	0.331671	4.97656	1.93e-06	0.000202208	nochange
28167.9	208943	chr9	75257959	75258224	+	266	Myo5c	protein-coding	1.3258	5.12285	1.99e-06	0.000207383	nochange
6330	22282	chr7	30945248	30946669	-	1422	Usf2	protein-coding	1.39842	5.20966	2.2e-06	0.000227527	nochange
2639.18	16201	chr9	21400452	21401803	+	1352	Ilf3	protein-coding	-0.425065	-4.91996	2.29e-06	0.000234667	nochange
13037.1	66661	chr5	76994836	76994913	+	78	Srp72	protein-coding	-1.02075	-4.95924	2.73e-06	0.000273517	nochange
14480.1	68938	chr11	120708658	120708709	+	52	Aspscr1	protein-coding	-1.26132	-4.99965	3.25e-06	0.000318448	nochange
33661.1	319899	chr9	21809748	21809940	-	193	Dock6	protein-coding	-0.89084	-4.78136	3.49e-06	0.00033802	nochange
16134.5	71807	chr3	95743853	95745862	-	2010	Tars2	protein-coding	-0.649736	-4.86338	3.62e-06	0.000348777	nochange
15345.9	70465	chr3	105967163	105969760	+	2598	Wdr77	protein-coding	0.286702	5.0559	3.92e-06	0.000375102	nochange
29076	219022	chr14	50765415	50766022	-	608	Ttc5	protein-coding	0.487391	4.95727	4.88e-06	0.000455982	nochange
4486	19353	chr5	143505481	143507105	-	1625	Rac1	protein-coding	0.430681	5.08453	5.28e-06	0.000482457	nochange
23694	108156	chr12	76255232	76255544	+	313	Mthfd1	protein-coding	-0.351087	-4.71433	5.41e-06	0.00049105	nochange
4142	18762	chr4	155260120	155262531	-	2412	Prkcz	protein-coding	0.625158	5.06925	5.57e-06	0.000504223	nochange
30847	240174	chr17	84190056	84192331	-	2276	Thada	protein-coding	0.429517	4.63747	6.97e-06	0.00060811	nochange
15242.4	70285	chr3	146510795	146512295	-	1501	Rpf1	protein-coding	-0.517044	-4.86057	7.04e-06	0.000612227	nochange
6915.2	26931	chr12	110465849	110466020	+	172	Ppp2r5c	protein-coding	0.657596	4.74081	7.13e-06	0.000618049	nochange
18371.1	75302	chr12	3499979	3506852	+	6874	Asxl2	protein-coding	0.335837	4.77241	7.92e-06	0.000678802	nochange
18358.1	75284	chr15	99474456	99474730	-	275	Bcdin3d	protein-coding	-0.901173	-5.13252	8.12e-06	0.000691641	nochange
18358	75284	chr15	99470084	99471079	-	996	Bcdin3d	protein-coding	0.901173	5.13252	8.12e-06	0.000691641	nochange
33685.2	319939	chr11	8548932	8549103	-	172	Tns3	protein-coding	0.999024	4.6747	8.32e-06	0.000704709	nochange
30959.9	241447	chr2	69108442	69111290	+	2849	Cers6	protein-coding	0.511784	4.78422	9.37e-06	0.00077916	nochange
14436.8	68837	chr11	121306768	121309896	+	3129	Foxk2	protein-coding	0.358415	4.70329	1.03e-05	0.000846193	nochange
1891.1	14538	chr13	40886758	40888285	+	1528	Gcnt2	protein-coding	0.460169	4.88057	1.07e-05	0.000872225	nochange
3666.2	17977	chr12	4354361	4354509	-	149	Ncoa1	protein-coding	1.09287	4.65298	1.08e-05	0.000876206	nochange
16406.3	72225	chr4	129961199	129961280	+	82	1700003M07Rik	ncRNA	-1.32882	-5.01419	1.18e-05	0.000944102	nochange
16406.4	72225	chr4	129963372	129965138	+	1767	1700003M07Rik	ncRNA	1.32882	5.01419	1.18e-05	0.000944102	nochange
13568.2	67414	chr3	32577063	32579225	+	2163	Mfn1	protein-coding	0.39693	4.55397	1.3e-05	0.00102025	nochange
37933	544752	chr11	3639794	3643179	-	3386	Tug1	ncRNA	0.359904	4.82108	1.32e-05	0.00103057	nochange
9881	57914	chr5	109554709	109555070	-	362	Crlf2	protein-coding	0.646594	4.71368	1.38e-05	0.00107567	nochange
17908	74610	chr5	24394156	24394583	+	428	Abcb8	protein-coding	-0.873291	-4.60688	1.39e-05	0.00107686	nochange
14436	68837	chr11	121259987	121260522	+	536	Foxk2	protein-coding	-0.516473	-4.6184	1.43e-05	0.00110156	nochange
6572.12	23797	chr1	177248676	177248767	-	92	Akt3	protein-coding	-1.05355	-4.85369	1.48e-05	0.00113421	nochange
14108.5	68201	chr2	110044187	110045325	+	1139	Ccdc34	protein-coding	0.518681	4.67902	1.57e-05	0.00119113	nochange
14906.1	69654	chr10	127277867	127277938	+	72	Dctn2	protein-coding	-1.31693	-4.55613	1.68e-05	0.00125972	nochange
5997	21750	chr8	107069402	107070565	-	1164	Terf2	protein-coding	-0.501039	-4.65565	1.7e-05	0.00127209	nochange
6027	21807	chr14	76415821	76419009	+	3189	Tsc22d1	protein-coding	-0.371664	-4.73965	1.74e-05	0.00129928	nochange
33661.8	319899	chr9	21804719	21804850	-	132	Dock6	protein-coding	-0.832347	-4.40756	1.75e-05	0.00130075	nochange
15970	71529	chr4	142102390	142104954	-	2565	Kazn	protein-coding	0.899125	4.58747	1.76e-05	0.00130459	nochange
6572	23797	chr1	177022115	177025449	-	3335	Akt3	protein-coding	0.787769	4.75129	2.08e-05	0.00149952	nochange
4893.3	19921	chr11	98028346	98028468	+	123	Rpl19	protein-coding	0.475648	4.63957	2.08e-05	0.00149952	nochange
6938.16	26992	chr8	88361906	88362191	-	286	Brd7	protein-coding	0.524786	4.4334	2.19e-05	0.00156576	nochange
19002.1	76303	chr19	11991900	11994114	+	2215	Osbp	protein-coding	0.349207	4.47062	2.33e-05	0.00164741	nochange
1891	14538	chr13	40859768	40861273	+	1506	Gcnt2	protein-coding	0.647007	4.65286	2.34e-05	0.00165052	nochange
27024	114601	chr19	5707369	5708425	-	1057	Ehbp1l1	protein-coding	0.902376	4.63809	2.47e-05	0.00172497	nochange
28979.1	217869	chr12	111544529	111546753	+	2225	Eif5	protein-coding	0.257998	4.42554	2.61e-05	0.00181599	nochange
396.4	12028	chr7	45466220	45466271	-	52	Bax	protein-coding	-0.429832	-4.5017	2.96e-05	0.00200563	nochange
14311	68581	chr12	85340614	85343549	-	2936	Tmed10	protein-coding	0.845416	4.70397	3.14e-05	0.00210951	nochange
14311.4	68581	chr12	85374441	85374717	-	277	Tmed10	protein-coding	-0.845416	-4.70397	3.14e-05	0.00210951	nochange
33685.1	319939	chr11	8453079	8453250	-	172	Tns3	protein-coding	-0.754412	-4.33005	3.28e-05	0.00216654	nochange
9832	57748	chr13	93430097	93435419	-	5323	Jmy	protein-coding	0.367402	4.38936	3.39e-05	0.00223804	nochange
7908.5	50772	chr9	75409202	75409359	-	158	Mapk6	protein-coding	-0.953822	-4.43337	3.4e-05	0.0022405	nochange
27643.2	170763	chr13	67521193	67521319	-	127	Zfp87	protein-coding	-1.33305	-4.67289	3.46e-05	0.00227329	nochange
27643	170763	chr13	67515781	67518112	-	2332	Zfp87	protein-coding	1.33305	4.67289	3.46e-05	0.00227329	nochange
3546	17755	chr13	99421464	99425961	-	4498	Map1b	protein-coding	-0.377565	-4.51334	3.76e-05	0.0024442	nochange
15029.5	69860	chr19	5369926	5371511	+	1586	Eif1ad	protein-coding	0.333622	4.46181	3.86e-05	0.00248966	nochange
52640.1	100504048	chr5	64803812	64804110	-	299	Gm20033	protein-coding	-1.40348	-4.63427	3.9e-05	0.00250667	nochange
52640	100504048	chr5	64802061	64802739	-	679	Gm20033	protein-coding	1.40348	4.63427	3.9e-05	0.00250667	nochange
9325.4	56044	chr13	17944017	17944217	-	201	Rala	protein-coding	-0.750977	-4.44996	4.02e-05	0.00256718	nochange
28605.1	214580	chr7	131373536	131373830	+	295	Pstk	protein-coding	-0.704271	-4.42823	4.33e-05	0.00271847	nochange
4268.5	19042	chr12	72793712	72794940	+	1229	Ppm1a	protein-coding	0.333469	4.44839	4.68e-05	0.00289991	nochange
7064.19	27416	chr16	20392451	20392807	-	357	Abcc5	protein-coding	-0.388011	-4.16042	4.76e-05	0.00293847	nochange
27866	192174	chr8	47533645	47533943	+	299	Rwdd4a	protein-coding	-0.684345	-4.43236	4.94e-05	0.00303524	nochange
4762.11	19664	chr5	53653305	53657445	+	4141	Rbpj	protein-coding	0.339383	4.38173	5.09e-05	0.00311065	nochange
5057	20316	chr11	78245746	78246170	+	425	Sdf2	protein-coding	-0.493642	-4.47687	5.09e-05	0.00311068	nochange
3807.1	18193	chr13	55213204	55214150	+	947	Nsd1	protein-coding	-0.291313	-4.155	5.39e-05	0.00324622	nochange
28167.2	208943	chr9	75275471	75275636	+	166	Myo5c	protein-coding	-0.983758	-4.2509	5.65e-05	0.00336878	nochange
6027.4	21807	chr14	76506417	76507766	+	1350	Tsc22d1	protein-coding	0.277578	4.38685	5.75e-05	0.00342019	nochange
5450.18	20874	chr19	47641947	47645246	+	3300	Slk	protein-coding	0.271751	4.14342	6.49e-05	0.00379231	nochange
28766	216345	chr10	115384959	115385807	+	849	Zfc3h1	protein-coding	-0.328195	-4.0971	6.54e-05	0.00381759	nochange
30324.1	234366	chr8	69995943	69996379	-	437	Gatad2a	protein-coding	-0.666142	-4.15882	6.54e-05	0.00381759	nochange
14563	69082	chr2	83644578	83644727	+	150	Zc3h15	protein-coding	0.378075	4.19269	6.98e-05	0.00402574	nochange
13356.4	67118	chr16	13692433	13692577	+	145	Bfar	protein-coding	-0.787369	-4.22539	7.15e-05	0.00410894	nochange
12824.2	66356	chr7	118850621	118850689	-	69	Knop1	protein-coding	-1.08574	-4.26017	7.7e-05	0.00436643	nochange
29441	226432	chr1	135382315	135385477	-	3163	Ipo9	protein-coding	0.262599	4.06769	7.71e-05	0.00436756	nochange
4123	18738	chr11	75588108	75588352	+	245	Pitpna	protein-coding	-0.592917	-4.22491	7.82e-05	0.00440063	nochange
33661.3	319899	chr9	21831412	21831643	-	232	Dock6	protein-coding	1.09541	4.02326	8.29e-05	0.00462723	nochange
17750	74386	chr13	58402248	58402517	+	270	Rmi1	protein-coding	-0.942414	-4.31875	8.47e-05	0.00470958	nochange
28057.9	207615	chr13	8850479	8853734	-	3256	Wdr37	protein-coding	-0.570911	-4.14687	8.76e-05	0.00482464	nochange
32991.2	269881	chr7	27657852	27658532	-	681	Map3k10	protein-coding	-0.834998	-4.19123	8.78e-05	0.00482631	nochange
14546.3	69053	chr16	8855794	8858924	+	3131	1810013L24Rik	protein-coding	0.305016	4.25734	8.83e-05	0.00484332	nochange
34915.2	338366	chr1	183344254	183344385	-	132	Mia3	protein-coding	-0.718698	-4.06033	9.15e-05	0.00498708	nochange
17758	74396	chrX	75725458	75727518	-	2061	4933407K13Rik	ncRNA	0.97864	4.27978	9.6e-05	0.0051828	nochange
33661.4	319899	chr9	21802353	21802589	-	237	Dock6	protein-coding	-0.530266	-3.98122	9.77e-05	0.00525348	nochange
6946.5	27041	chr11	55493448	55493541	+	94	G3bp1	protein-coding	-1.07813	-4.07151	9.79e-05	0.00526088	nochange
24161	108705	chr10	77581767	77581927	+	161	Pttg1ip	protein-coding	-0.623896	-4.21951	0.00010004	0.00536428	nochange
4406.2	19244	chr4	129838978	129839678	+	701	Ptp4a2	protein-coding	-0.270012	-4.18125	0.000100559	0.00538367	nochange
33661.6	319899	chr9	21802993	21803118	-	126	Dock6	protein-coding	-0.770319	-3.96527	0.000103894	0.0055405	nochange
28983.2	217893	chr12	113071538	113074401	+	2864	Pacs2	protein-coding	0.43643	4.0557	0.000108432	0.00575557	nochange
13970.5	67978	chr5	124607736	124607932	+	197	Tctn2	protein-coding	-1.44744	-4.19256	0.000109295	0.00577895	nochange
4142.18	18762	chr4	155361152	155361391	-	240	Prkcz	protein-coding	-0.617905	-4.19148	0.000109682	0.00579495	nochange
16134.1	71807	chr3	95750701	95750765	-	65	Tars2	protein-coding	-0.923217	-3.99924	0.000111588	0.00585941	nochange
37945.2	544817	chr11	103359372	103360918	-	1547	Arhgap27	protein-coding	-1.03954	-4.19693	0.000124922	0.00641664	nochange
2141	14924	chr6	93675455	93679002	-	3548	Magi1	protein-coding	0.47629	4.00288	0.00013754	0.00696531	nochange
37945	544817	chr11	103331484	103333040	-	1557	Arhgap27	protein-coding	1.0593	4.14289	0.000148218	0.00742108	nochange
12516.1	64657	chr17	47369197	47369357	+	161	Mrps10	protein-coding	-0.99072	-4.13369	0.000152582	0.00759764	nochange
4126.3	18741	chr3	129213937	129214781	+	845	Pitx2	protein-coding	-0.658951	-4.12624	0.00015621	0.00774444	nochange
33685	319939	chr11	8431652	8434638	-	2987	Tns3	protein-coding	-0.326395	-3.88833	0.000172133	0.00845459	nochange
33685.9	319939	chr11	8450855	8451495	-	641	Tns3	protein-coding	-0.418837	-3.88832	0.000172141	0.00845459	nochange
4364	19185	chr3	95032705	95032984	-	280	Psmd4	protein-coding	0.221998	3.95309	0.000172797	0.0084807	nochange
29193.6	224020	chr16	17282823	17282927	-	105	Pi4ka	protein-coding	1.04303	3.83285	0.000177676	0.00867036	nochange
2639.21	16201	chr9	21404696	21405361	+	666	Ilf3	protein-coding	0.323455	3.83728	0.000184089	0.00892597	nochange
3766	18130	chr14	62676325	62678167	-	1843	Ints6	protein-coding	-0.86303	-3.85659	0.000188372	0.00909872	nochange
13356.1	67118	chr16	13685062	13685398	+	337	Bfar	protein-coding	-0.476297	-3.94504	0.00018881	0.00910963	nochange
33661.1	319899	chr9	21814469	21814603	-	135	Dock6	protein-coding	1.18865	3.80544	0.00019102	0.00920327	nochange
3807.22	18193	chr13	55312119	55318325	+	6207	Nsd1	protein-coding	0.171366	3.82182	0.000192151	0.00925128	nochange
22486	103573	chr11	23256041	23256160	+	120	Xpo1	protein-coding	-0.413869	-3.80136	0.000202096	0.00962837	nochange
17409	73919	chr7	119896292	119896572	+	281	Lyrm1	protein-coding	-1.43661	-4.0831	0.000211902	0.00997049	nochange
17409.3	73919	chr7	119916141	119916750	+	610	Lyrm1	protein-coding	1.43661	4.0831	0.000211902	0.00997049	nochange
6477.4	22631	chr15	36790684	36790988	-	305	Ywhaz	protein-coding	-0.43357	-3.9773	0.000219676	0.0102449	nochange
8436.14	52563	chr18	34651390	34651462	-	73	Cdc23	protein-coding	-0.986974	-3.828	0.000219682	0.0102449	nochange
5444.18	20868	chr11	32622424	32624595	+	2172	Stk10	protein-coding	0.479052	3.8857	0.000230876	0.0106579	nochange
4406	19244	chr4	129820479	129820601	+	123	Ptp4a2	protein-coding	-0.392361	-3.89872	0.000256355	0.0116453	nochange
20180.2	78412	chr6	34876539	34876771	-	233	3110062M04Rik	protein-coding	1.23605	4.01558	0.0002596	0.0117281	nochange
20180.3	78412	chr6	34877575	34878065	-	491	3110062M04Rik	protein-coding	-1.23605	-4.01558	0.0002596	0.0117281	nochange
7903.3	50767	chr8	3517077	3517164	+	88	Pnpla6	protein-coding	0.501506	3.72772	0.000259721	0.0117281	nochange
3178.88	16971	chr10	127620618	127621148	-	531	Lrp1	protein-coding	-0.944945	-3.69176	0.000264024	0.0118675	nochange
5997.3	21750	chr8	107075519	107076999	-	1481	Terf2	protein-coding	0.409496	3.82578	0.000301082	0.0132612	nochange
28845	216965	chr11	77529162	77538328	-	9167	Taok1	protein-coding	0.190733	3.72245	0.000304621	0.013393	nochange
30847.3	240174	chr17	84443818	84444509	-	692	Thada	protein-coding	-0.347216	-3.68069	0.000311415	0.0136565	nochange
37933.1	544752	chr11	3643268	3645523	-	2256	Tug1	ncRNA	-0.310934	-3.86118	0.000318018	0.0138484	nochange
9264.1	54725	chr9	47850272	47853385	+	3114	Cadm1	protein-coding	0.38525	3.7726	0.000319934	0.0138964	nochange
18886	76055	chr19	45750259	45752280	-	2022	Mgea5	protein-coding	0.215626	3.7003	0.000329414	0.0142268	nochange
32969	269702	chr5	124250959	124255118	-	4160	Mphosph9	protein-coding	0.368343	3.72894	0.000329943	0.0142407	nochange
14049.2	68112	chr2	26385083	26385145	-	63	Sdccag3	protein-coding	-0.97589	-3.76023	0.000333535	0.0143775	nochange
17750.4	74386	chr13	58407910	58411149	+	3240	Rmi1	protein-coding	0.642645	3.8816	0.000334814	0.0144145	nochange
6411.14	22388	chr5	38561516	38561595	-	80	Wdr1	protein-coding	0.493914	3.69987	0.000337	0.0144813	nochange
28241	209773	chr6	39462378	39463451	-	1074	Dennd2a	protein-coding	0.444557	3.72128	0.000338768	0.0145352	nochange
7064.1	27416	chr16	20333586	20333750	-	165	Abcc5	protein-coding	0.429605	3.64814	0.000338893	0.0145352	nochange
29824.2	230376	chr4	86611686	86612022	-	337	Haus6	protein-coding	-0.315266	-3.72011	0.000340132	0.01457	nochange
5444.8	20868	chr11	32598439	32598984	+	546	Stk10	protein-coding	-0.718198	-3.76407	0.000346854	0.0147931	nochange
6686.9	23986	chr13	34993830	34994144	-	315	Eci2	protein-coding	-0.564563	-3.74641	0.000349373	0.0148776	nochange
14960.6	69737	chr2	129092941	129096283	+	3343	Ttl	protein-coding	-0.387809	-3.77863	0.000351461	0.0149152	nochange
6920.2	26939	chr7	120945476	120947432	+	1957	Polr3e	protein-coding	0.366297	3.69932	0.00037753	0.0158737	nochange
12516.7	64657	chr17	47378202	47378679	+	478	Mrps10	protein-coding	0.765063	3.84055	0.00037983	0.0159606	nochange
3681.1	18002	chr14	55663415	55663497	-	83	Nedd8	protein-coding	-0.795492	-3.86401	0.000407811	0.016877	nochange
3681.3	18002	chr14	55671795	55671906	-	112	Nedd8	protein-coding	0.795492	3.86401	0.000407811	0.016877	nochange
4762.9	19664	chr5	53652607	53652762	+	156	Rbpj	protein-coding	-0.365725	-3.7515	0.000412281	0.0170208	nochange
30959	241447	chr2	68861557	68861805	+	249	Cers6	protein-coding	-0.573981	-3.70282	0.000424602	0.0174138	nochange
7954.5	50912	chr4	148563021	148563135	+	115	Exosc10	protein-coding	0.444497	3.62115	0.000426845	0.0174639	nochange
13198.1	66894	chr8	107548469	107548550	+	82	Wwp2	protein-coding	-0.992442	-3.60424	0.000445521	0.01801	nochange
20716	83797	chr15	99702287	99702498	+	212	Smarcd1	protein-coding	-0.65131	-3.65031	0.000445726	0.01801	nochange
2449.1	15507	chr5	135889049	135889112	+	64	Hspb1	protein-coding	-1.11433	-3.75658	0.000490789	0.0194402	nochange
6705.15	24018	chr4	33500238	33502610	+	2373	Rngtt	protein-coding	0.385894	3.65097	0.000503159	0.0197917	nochange
30370.1	234733	chr8	111027598	111027770	-	173	Ddx19b	protein-coding	-0.966767	-3.64799	0.000536695	0.0207169	nochange
9325.2	56044	chr13	17893122	17893330	-	209	Rala	protein-coding	-0.40631	-3.65878	0.000553502	0.0211717	nochange
28766.3	216345	chr10	115431896	115432771	+	876	Zfc3h1	protein-coding	0.348212	3.5132	0.00057119	0.0216516	nochange
4126.5	18741	chr3	129218334	129219591	+	1258	Pitx2	protein-coding	0.552637	3.70642	0.000571322	0.0216516	nochange
13390	67163	chr11	106199354	106201016	-	1663	Ccdc47	protein-coding	0.332955	3.57544	0.000572886	0.0216869	nochange
28132.6	208606	chr5	123742779	123742856	-	78	Rsrc2	protein-coding	-0.931391	-3.57398	0.000575677	0.0217684	nochange
4486.5	19353	chr5	143527763	143527993	-	231	Rac1	protein-coding	-0.371671	-3.66379	0.000589654	0.0221303	nochange
5444.11	20868	chr11	32604121	32604300	+	180	Stk10	protein-coding	-0.926537	-3.6006	0.000592577	0.0222158	nochange
2060.14	14783	chr11	11970423	11970642	-	220	Grb10	protein-coding	0.767874	3.57508	0.000592908	0.0222158	nochange
16568.8	72508	chr11	86513983	86516191	-	2209	Rps6kb1	protein-coding	-0.596969	-3.57855	0.000608915	0.0226248	nochange
34286.9	320916	chr5	113587793	113589725	+	1933	Wscd2	protein-coding	0.623284	3.68443	0.000610523	0.0226599	nochange
8843.7	53356	chr9	20897888	20897976	-	89	Eif3g	protein-coding	-0.489966	-3.57696	0.000612096	0.0226937	nochange
6276.1	22201	chrX	20662955	20663125	+	171	Uba1	protein-coding	-0.327474	-3.47937	0.000637452	0.0234305	nochange
1861	14455	chr1	161035166	161037547	+	2382	Gas5	ncRNA	0.483345	3.62761	0.000659225	0.0240241	nochange
21959.4	100177	chr4	127092912	127093083	+	172	Zmym6	protein-coding	-0.717242	-3.54257	0.000659841	0.0240338	nochange
9295	55989	chr1	59685006	59685226	+	221	Nop58	protein-coding	-0.247599	-3.50767	0.000666167	0.024174	nochange
3546.2	17755	chr13	99429212	99435701	-	6490	Map1b	protein-coding	0.29014	3.61932	0.000676233	0.0244614	nochange
28983.2	217893	chr12	113069282	113069423	+	142	Pacs2	protein-coding	-0.873215	-3.51388	0.000702454	0.0252496	nochange
1813.6	14376	chr19	8908678	8908747	+	70	Ganab	protein-coding	-0.993649	-3.45212	0.000719091	0.0257258	nochange
13546	67379	chr7	25202840	25203931	-	1092	Dedd2	protein-coding	-0.391448	-3.59869	0.0007204	0.0257592	nochange
33661.4	319899	chr9	21844207	21844419	-	213	Dock6	protein-coding	0.641152	3.43784	0.000721038	0.0257685	nochange
1316.13	13437	chr1	75316710	75316803	-	94	Dnpep	protein-coding	-0.430778	-3.48329	0.000722936	0.025779	nochange
29359	225724	chr18	73928486	73931094	-	2609	Mapk4	protein-coding	0.528083	3.66866	0.000723271	0.025779	nochange
29359.4	225724	chr18	73969891	73971276	-	1386	Mapk4	protein-coding	-0.528083	-3.66866	0.000723271	0.025779	nochange
9511.9	56436	chr2	180176074	180176283	+	210	Adrm1	protein-coding	-0.778761	-3.55428	0.00072349	0.025779	nochange
34022	320487	chr12	51875873	51877616	-	1744	Heatr5a	protein-coding	0.311431	3.43456	0.000724869	0.0257967	nochange
29670.1	228829	chr2	156223335	156223449	+	115	Phf20	protein-coding	-0.764739	-3.47235	0.000735839	0.0260929	nochange
30131.2	232811	chr7	4742122	4742287	+	166	Suv420h2	protein-coding	0.401056	3.52986	0.000744018	0.0263478	nochange
7903.29	50767	chr8	3537969	3538085	+	117	Pnpla6	protein-coding	-0.500846	-3.4185	0.000781252	0.0273067	nochange
33685.3	319939	chr11	8615740	8615851	-	112	Tns3	protein-coding	1.14731	3.44991	0.000793274	0.0276562	nochange
4806.2	19732	chr17	33931726	33931809	+	84	Rgl2	protein-coding	0.904935	3.46605	0.000800415	0.0278625	nochange
14852	69562	chr13	17715962	17718911	-	2950	Cdk13	protein-coding	0.234802	3.46484	0.000803596	0.0279448	nochange
52113	100502987	chr14	105106728	105109802	-	3075	Gm17066	ncRNA	0.614331	3.62804	0.000813645	0.0281691	nochange
52113.2	100502987	chr14	105114120	105114676	-	557	Gm17066	ncRNA	-0.614331	-3.62804	0.000813645	0.0281691	nochange
4806.15	19732	chr17	33935740	33936033	+	294	Rgl2	protein-coding	0.445618	3.45498	0.000830084	0.0285581	nochange
13140.1	66812	chr9	57415086	57415254	-	169	Ppcdc	protein-coding	0.486729	3.51038	0.000830927	0.0285611	nochange
2853.2	16468	chr13	44823380	44823515	+	136	Jarid2	protein-coding	-0.344936	-3.42117	0.000835184	0.0286354	nochange
9882.7	57915	chr5	64275395	64275505	+	111	Tbc1d1	protein-coding	-0.89747	-3.42495	0.000848238	0.0290102	nochange
33048.8	270669	chrX	157591354	157591555	-	202	Mbtps2	protein-coding	-0.763714	-3.57434	0.000848828	0.0290159	nochange
12701.2	66191	chr18	76940513	76941614	+	1102	Ier3ip1	protein-coding	0.509515	3.5716	0.000855789	0.0291643	nochange
7064.3	27416	chr16	20338876	20338954	-	79	Abcc5	protein-coding	0.905921	3.38621	0.000856804	0.0291719	nochange
8312.4	52348	chr8	40536870	40537095	+	226	Vps37a	protein-coding	-0.575881	-3.51846	0.000858164	0.0292036	nochange
6576.2	23806	chr9	59396351	59396611	-	261	Arih1	protein-coding	-0.338295	-3.46895	0.000868025	0.0294952	nochange
3394.8	17345	chr7	135707361	135708320	-	960	Mki67	protein-coding	0.233301	3.44072	0.000869832	0.0295419	nochange
912.3	12859	chr1	36693197	36693388	+	192	Cox5b	protein-coding	0.529149	3.55925	0.000887763	0.0300018	nochange
29260.2	224705	chr17	33965281	33965392	+	112	Vps52	protein-coding	-0.800904	-3.45671	0.000902719	0.0303274	nochange
28113	208263	chr1	156004599	156007709	-	3111	Tor1aip1	protein-coding	0.738382	3.58727	0.000915239	0.0306426	nochange
28113.1	208263	chr1	156035758	156036480	-	723	Tor1aip1	protein-coding	-0.738382	-3.58727	0.000915239	0.0306426	nochange
7903.26	50767	chr8	3536863	3537019	+	157	Pnpla6	protein-coding	-0.420336	-3.36991	0.000922765	0.0308643	nochange
31116.5	243272	chr5	124381683	124381777	-	95	Sbno1	protein-coding	-0.70712	-3.36319	0.00092722	0.0309982	nochange
15096	69981	chr9	79768941	79771479	-	2539	Tmem30a	protein-coding	0.364891	3.47421	0.000930642	0.0310974	nochange
24248.2	109151	chr8	90932249	90933862	+	1614	Chd9	protein-coding	0.325808	3.35602	0.000967433	0.0319485	nochange
15029.3	69860	chr19	5368617	5368725	+	109	Eif1ad	protein-coding	-0.565244	-3.47741	0.000973951	0.0320281	nochange
16417.5	72238	chr17	50799867	50800195	-	329	Tbc1d5	protein-coding	-0.932682	-3.56265	0.000982385	0.0322278	nochange
16417	72238	chr17	50733127	50736244	-	3118	Tbc1d5	protein-coding	0.932682	3.56265	0.000982385	0.0322278	nochange
29441.2	226432	chr1	135419237	135419438	-	202	Ipo9	protein-coding	-0.363673	-3.36025	0.000991921	0.0325021	nochange
7064.2	27416	chr16	20335106	20335219	-	114	Abcc5	protein-coding	0.662235	3.34261	0.000994713	0.0325697	nochange
9511.8	56436	chr2	180175854	180175956	+	103	Adrm1	protein-coding	-0.620798	-3.45267	0.000995325	0.0325741	nochange
24161.5	108705	chr10	77597028	77598732	+	1705	Pttg1ip	protein-coding	0.281891	3.49181	0.000997052	0.0325926	nochange
17348.8	73834	chr12	78861419	78861638	-	220	Atp6v1d	protein-coding	0.535635	3.49082	0.00100001	0.032626	nochange
19082.4	76499	chr9	113909416	113909544	+	129	Clasp2	protein-coding	0.727416	3.33853	0.00102656	0.0332779	nochange
34159.2	320714	chr8	47524971	47525070	-	100	Trappc11	protein-coding	-0.879134	-3.34278	0.00107304	0.0344739	nochange
19112.7	76577	chr13	54652043	54652220	+	178	Faf2	protein-coding	-0.437879	-3.42424	0.00108722	0.0348966	nochange
17470	74007	chr10	85386814	85388478	+	1665	Btbd11	protein-coding	-0.537676	-3.48701	0.00109893	0.0351241	nochange
17758.6	74396	chrX	75755366	75755528	-	163	4933407K13Rik	ncRNA	-0.952806	-3.47853	0.00112668	0.0357299	nochange
16134	71807	chr3	95739974	95740319	-	346	Tars2	protein-coding	0.323647	3.337	0.00113514	0.0359453	nochange
23694.2	108156	chr12	76310909	76311009	+	101	Mthfd1	protein-coding	-0.338478	-3.31335	0.00115033	0.036292	nochange
32739	259302	chr6	112717971	112723201	-	5231	Srgap3	protein-coding	-0.586001	-3.42089	0.00115789	0.0364296	nochange
8312	52348	chr8	40511783	40512233	+	451	Vps37a	protein-coding	-0.38839	-3.40852	0.0012023	0.0376192	nochange
16641	72654	chr9	110656503	110656658	+	156	Ccdc12	protein-coding	0.859981	3.48739	0.00121832	0.0379985	nochange
16641.6	72654	chr9	110711251	110711593	+	343	Ccdc12	protein-coding	-0.859981	-3.48739	0.00121832	0.0379985	nochange
15462.3	70699	chr6	35236766	35236892	+	127	Nup205	protein-coding	0.449707	3.27024	0.00122617	0.0381136	nochange
16126	71795	chr11	107207892	107212658	-	4767	Pitpnc1	protein-coding	0.335937	3.38725	0.00128251	0.0395138	nochange
28845.2	216965	chr11	77607208	77607815	-	608	Taok1	protein-coding	-0.232055	-3.29839	0.00128789	0.039626	nochange
4762.5	19664	chr5	53645870	53646044	+	175	Rbpj	protein-coding	-0.668296	-3.38002	0.00131092	0.0401359	nochange
17557.2	74125	chr9	99568602	99568899	-	298	Armc8	protein-coding	0.53596	3.33465	0.0013281	0.0404987	nochange
2141.25	14924	chr6	94283010	94283904	-	895	Magi1	protein-coding	-0.501099	-3.32438	0.00133126	0.0405647	nochange
13198.2	66894	chr8	107556887	107558595	+	1709	Wwp2	protein-coding	0.251771	3.27595	0.00135216	0.0410675	nochange
33661.5	319899	chr9	21802814	21802903	-	90	Dock6	protein-coding	-0.943835	-3.24968	0.00136737	0.0414927	nochange
15976.1	71538	chr9	78108291	78108656	-	366	Fbxo9	protein-coding	-0.543607	-3.34869	0.00137206	0.0415797	nochange
13556.1	67392	chr13	119485727	119486117	+	391	4833420G17Rik	protein-coding	0.50218	3.34717	0.00137848	0.0417186	nochange
6411	22388	chr5	38526813	38527912	-	1100	Wdr1	protein-coding	0.165442	3.2805	0.00138427	0.0418701	nochange
28084.5	208043	chr5	123147547	123148755	+	1209	Setd1b	protein-coding	-0.874691	-3.40341	0.00140326	0.0422443	nochange
28621.1	214764	chr7	133650501	133650609	+	109	Edrf1	protein-coding	-0.695438	-3.24424	0.00142527	0.0426626	nochange
4362.6	19183	chr11	101095158	101095258	-	101	Psmc3ip	protein-coding	-0.637625	-3.34827	0.00144281	0.0430369	nochange
6938.5	26992	chr8	88339409	88339520	-	112	Brd7	protein-coding	-0.832116	-3.26261	0.00146639	0.0436072	nochange
6896.2	26901	chr9	121712565	121712921	+	357	Deb1	protein-coding	0.788337	3.42159	0.00146824	0.0436074	nochange
6896.1	26901	chr9	121710639	121710715	+	77	Deb1	protein-coding	-0.788337	-3.42159	0.00146824	0.0436074	nochange
15133.5	70047	chr6	106776454	106777681	+	1228	Trnt1	protein-coding	-0.497429	-3.3125	0.00147237	0.0436332	nochange
1861.3	14455	chr1	161038457	161038537	+	81	Gas5	ncRNA	-0.732085	-3.35613	0.00149555	0.0441791	nochange
5448.7	20872	chr1	75213814	75215606	+	1793	Stk16	protein-coding	0.444106	3.2945	0.00150512	0.0443727	nochange
6999.9	27275	chr14	76134786	76137379	+	2594	Nufip1	protein-coding	0.301916	3.2916	0.00151875	0.0446208	nochange
15961.9	71517	chr7	118773021	118773117	+	97	9030624J02Rik	protein-coding	-0.920815	-3.24751	0.00156249	0.045573	nochange
52285.2	100503380	chr18	35556616	35556691	+	76	Snhg4	ncRNA	-0.838607	-3.35065	0.00163499	0.0471642	nochange
19112.1	76577	chr13	54660954	54664063	+	3110	Faf2	protein-coding	0.24483	3.28772	0.00165189	0.0474916	nochange
33661.1	319899	chr9	21813385	21813537	-	153	Dock6	protein-coding	0.879701	3.18782	0.00167749	0.0481261	nochange
555.12	12331	chr4	122885833	122885881	-	49	Cap1	protein-coding	0.825325	3.22595	0.00170102	0.0486584	nochange
21959.1	100177	chr4	127120428	127120572	+	145	Zmym6	protein-coding	0.872412	3.24584	0.0017021	0.0486618	nochange
6915	26931	chr12	110447179	110447385	+	207	Ppp2r5c	protein-coding	0.671175	3.22286	0.0017177	0.049033	nochange
29551.1	227624	chr2	25602421	25602555	-	135	Rabl6	protein-coding	-0.73436	-3.22821	0.00172008	0.0490598	nochange
29177	223870	chr15	98038744	98042952	-	4209	Senp1	protein-coding	0.231581	3.2274	0.00172447	0.0491237	nochange
33661.2	319899	chr9	21820522	21820661	-	140	Dock6	protein-coding	0.89382	3.17638	0.00174152	0.0495267	nochange
3554	17765	chr5	108065674	108065965	+	292	Mtf2	protein-coding	-1.30756	-14.5579	5.08e-29	5.78e-25	up-regulated
34962.7	353211	chr19	17118043	17124592	+	6550	Prune2	protein-coding	-2.59999	-19.8166	8.07e-29	7.89e-25	up-regulated
13033.7	66656	chr15	75902679	75903808	-	1130	Eef1d	protein-coding	-1.37283	-14.2105	5.32e-23	2.63e-19	up-regulated
17265.2	73699	chr9	50892656	50894229	+	1574	Ppp2r1b	protein-coding	-1.81055	-12.1794	8.07e-22	3.45e-18	up-regulated
4917.1	20018	chr5	147078535	147079080	+	546	Polr1d	protein-coding	1.52146	15.7017	6.28e-20	1.59e-16	up-regulated
8873.14	53605	chr10	111496040	111498150	+	2111	Nap1l1	protein-coding	1.20046	12.7177	8.77e-20	2.07e-16	up-regulated
34962.2	353211	chr19	17220784	17223932	+	3149	Prune2	protein-coding	1.39337	12.0981	4.18e-18	7.72e-15	up-regulated
4917.3	20018	chr5	147110648	147111359	+	712	Polr1d	protein-coding	-1.41019	-13.9529	5.35e-18	9.38e-15	up-regulated
6610.1	23856	chr2	180681059	180684028	-	2970	Dido1	protein-coding	-0.577737	-9.67664	8.1e-17	1.09e-13	up-regulated
15630	70984	chr9	15283337	15284991	-	1655	4931406C07Rik	protein-coding	2.24683	12.9481	9.6e-16	1.09e-12	up-regulated
15630.9	70984	chr9	15306214	15306448	-	235	4931406C07Rik	protein-coding	-2.24683	-12.9481	9.6e-16	1.09e-12	up-regulated
13950	67945	chr10	128548110	128548429	-	320	Rpl41	protein-coding	1.12015	11.2239	2.05e-15	2.29e-12	up-regulated
2324	15289	chr5	149047227	149048913	-	1687	Hmgb1	protein-coding	1.66484	11.0081	4.16e-15	4.18e-12	up-regulated
9343.8	56086	chr2	30070919	30072577	+	1659	Set	protein-coding	0.783646	10.8425	7.19e-15	6.82e-12	up-regulated
3554.2	17765	chr5	108073307	108073454	+	148	Mtf2	protein-coding	0.960265	8.79855	7.6e-15	6.93e-12	up-regulated
28935.2	217558	chr12	51372430	51376986	+	4557	G2e3	protein-coding	0.722754	8.99641	1.07e-14	9.64e-12	up-regulated
6064.1	21849	chr7	13029207	13029252	+	46	Trim28	protein-coding	-1.27801	-8.68585	1.42e-14	1.25e-11	up-regulated
4448	19294	chr7	19716644	19717787	-	1144	Pvrl2	protein-coding	-0.698484	-9.40317	2.49e-14	2.07e-11	up-regulated
28357.2	211586	chr9	96317788	96323646	+	5859	Tfdp2	protein-coding	0.762244	9.35225	3.11e-14	2.53e-11	up-regulated
1972	14660	chr1	52163449	52166314	-	2866	Gls	protein-coding	-0.967991	-8.82329	3.95e-14	3.17e-11	up-regulated
6969.2	27176	chr2	26911422	26911571	+	150	Rpl7a	protein-coding	1.11768	9.80558	7.37e-14	5.6e-11	up-regulated
14617.1	69178	chr2	144270701	144270902	-	202	Snx5	protein-coding	-1.42274	-8.55369	1.04e-13	7.66e-11	up-regulated
233	11782	chr12	51690966	51691314	+	349	Ap4s1	protein-coding	-2.27331	-10.2661	2.14e-13	1.49e-10	up-regulated
7991.12	51813	chr4	21748137	21750546	+	2410	Ccnc	protein-coding	1.0787	9.21986	2.61e-13	1.77e-10	up-regulated
9205.7	54484	chr6	39420099	39420369	-	271	Mkrn1	protein-coding	-0.528303	-9.15492	3.39e-13	2.2e-10	up-regulated
8873.1	53605	chr10	111480617	111481316	+	700	Nap1l1	protein-coding	-1.46115	-8.87097	4.99e-13	3.1e-10	up-regulated
9343.1	56086	chr2	30066474	30066893	+	420	Set	protein-coding	-0.74404	-9.53989	5.99e-13	3.63e-10	up-regulated
3679	17999	chr9	72662347	72662612	+	266	Nedd4	protein-coding	-0.784471	-8.14895	6e-13	3.63e-10	up-regulated
20392.3	78781	chr6	38315672	38316423	-	752	Zc3hav1	protein-coding	-1.00413	-8.43646	6.28e-13	3.76e-10	up-regulated
12633	66101	chr4	119300010	119300183	-	174	Ppih	protein-coding	1.27724	9.87473	7.3e-13	4.3e-10	up-regulated
9205	54484	chr6	39397821	39399434	-	1614	Mkrn1	protein-coding	0.401572	8.92526	8.46e-13	4.9e-10	up-regulated
9416	56295	chr9	121848560	121849689	-	1130	Higd1a	protein-coding	1.47757	9.73477	1.14e-12	6.42e-10	up-regulated
6610	23856	chr2	180657964	180662583	-	4620	Dido1	protein-coding	0.381491	7.78529	2.43e-12	1.27e-09	up-regulated
3594.13	17865	chr2	163083166	163084687	+	1522	Mybl2	protein-coding	0.777982	8.0521	3.82e-12	1.93e-09	up-regulated
13415	67204	chr2	154871410	154872900	-	1491	Eif2s2	protein-coding	0.472803	8.22899	7.45e-12	3.59e-09	up-regulated
1314.3	13435	chr12	3865985	3866252	+	268	Dnmt3a	protein-coding	-2.20575	-7.56731	1.52e-11	6.78e-09	up-regulated
4929.2	20084	chr17	33952403	33952591	-	189	Rps18	protein-coding	0.973767	8.47893	2.52e-11	1.07e-08	up-regulated
13950.2	67945	chr10	128548949	128548973	-	25	Rpl41	protein-coding	-1.07159	-8.39528	3.4e-11	1.39e-08	up-regulated
4235	18983	chr8	40493036	40494115	-	1080	Cnot7	protein-coding	0.776401	7.98775	3.66e-11	1.47e-08	up-regulated
12633.1	66101	chr4	119306290	119307883	-	1594	Ppih	protein-coding	-1.10118	-8.50589	6.15e-11	2.32e-08	up-regulated
18596.3	75617	chr9	44409954	44410052	+	99	Rps25	protein-coding	-1.03569	-7.99235	6.89e-11	2.55e-08	up-regulated
14617.1	69178	chr2	144270377	144270572	-	196	Snx5	protein-coding	-0.695407	-7.25648	7.07e-11	2.59e-08	up-regulated
15032	69863	chr4	83220301	83227224	-	6924	Ttc39b	protein-coding	0.739087	7.36963	9.17e-11	3.23e-08	up-regulated
18712	75796	chr8	116568724	116575287	-	6564	Cdyl2	protein-coding	0.577298	7.74484	9.76e-11	3.41e-08	up-regulated
32801	268390	chr11	23487882	23490570	-	2689	Ahsa2	protein-coding	-1.3172	-7.60997	1.01e-10	3.5e-08	up-regulated
20092	78255	chr1	156804166	156809193	-	5028	Ralgps2	protein-coding	0.840457	7.60825	1.02e-10	3.51e-08	up-regulated
729	12572	chr13	100697024	100703506	-	6483	Cdk7	protein-coding	0.681671	7.4869	1.11e-10	3.75e-08	up-regulated
4448.4	19294	chr7	19724161	19724869	-	709	Pvrl2	protein-coding	0.497195	7.4868	1.11e-10	3.75e-08	up-regulated
12994	66599	chr11	101627949	101628064	+	116	Rdm1	protein-coding	-0.998084	-7.5016	1.6e-10	5.21e-08	up-regulated
4130.8	18746	chr9	59675029	59675195	+	167	Pkm	protein-coding	-0.824044	-7.13372	1.62e-10	5.24e-08	up-regulated
24155.1	108682	chr8	85492905	85493169	+	265	Gpt2	protein-coding	0.880378	7.35103	2e-10	6.24e-08	up-regulated
2456	15525	chr11	53259814	53261815	-	2002	Hspa4	protein-coding	0.408746	6.85059	2.36e-10	7.27e-08	up-regulated
18596.2	75617	chr9	44408686	44408869	+	184	Rps25	protein-coding	0.694781	7.56646	3.54e-10	1.04e-07	up-regulated
482	12217	chr9	108096022	108099897	-	3876	Bsn	protein-coding	2.7474	8.28706	3.76e-10	1.09e-07	up-regulated
482.7	12217	chr9	108109885	108116526	-	6642	Bsn	protein-coding	-2.7474	-8.28706	3.76e-10	1.09e-07	up-regulated
6969.5	27176	chr2	26912671	26912801	+	131	Rpl7a	protein-coding	-1.52726	-7.54538	3.83e-10	1.11e-07	up-regulated
12916.1	66480	chr14	18269907	18270043	-	137	Rpl15	protein-coding	-1.78466	-7.9442	4.02e-10	1.15e-07	up-regulated
9488	56403	chr9	88449738	88454295	-	4558	Syncrip	protein-coding	0.538021	7.0786	4.7e-10	1.33e-07	up-regulated
24155.5	108682	chr8	85512113	85512356	+	244	Gpt2	protein-coding	0.775787	7.0869	6.3e-10	1.74e-07	up-regulated
13543.9	67374	chr16	84822787	84826380	+	3594	Jam2	protein-coding	0.45739	7.07013	9.78e-10	2.59e-07	up-regulated
13997	68024	chr13	23684199	23684621	+	423	Hist1h2bc	protein-coding	0.918708	7.95299	1.05e-09	2.75e-07	up-regulated
13997.1	68024	chr13	23692176	23692480	+	305	Hist1h2bc	protein-coding	-0.918708	-7.95299	1.05e-09	2.75e-07	up-regulated
33118.9	276770	chr11	69921163	69921386	-	224	Eif5a	protein-coding	-0.66914	-7.00304	1.29e-09	3.3e-07	up-regulated
3601.2	17876	chr2	125087742	125089037	-	1296	Myef2	protein-coding	0.745622	6.71786	2.33e-09	5.62e-07	up-regulated
28659	215201	chrX	134222955	134224705	-	1751	Trmt2b	protein-coding	1.51937	7.37659	2.74e-09	6.56e-07	up-regulated
13415.8	67204	chr2	154892690	154892906	-	217	Eif2s2	protein-coding	-0.677903	-6.80513	2.95e-09	7.04e-07	up-regulated
29609.2	228061	chr2	75925922	75931350	+	5429	Agps	protein-coding	0.442065	6.47356	3.11e-09	7.34e-07	up-regulated
15081.1	69956	chr6	71894821	71894881	-	61	Ptcd3	protein-coding	-1.24567	-6.38759	3.53e-09	8.24e-07	up-regulated
233.5	11782	chr12	51738553	51738939	+	387	Ap4s1	protein-coding	1.43229	7.21781	4.72e-09	1.07e-06	up-regulated
28419	212442	chr1	13625898	13626904	-	1007	Lactb2	protein-coding	0.648456	6.6788	4.99e-09	1.12e-06	up-regulated
3386	17319	chr10	75859353	75859543	-	191	Mif	protein-coding	0.68779	7.10049	7.04e-09	1.53e-06	up-regulated
4401.3	19231	chr1	86529731	86529804	+	74	Ptma	protein-coding	-1.23684	-6.78119	7.23e-09	1.56e-06	up-regulated
14305.3	68564	chr11	77709683	77717966	+	8284	Nufip2	protein-coding	0.47702	7.01782	9.34e-09	1.97e-06	up-regulated
17265.2	73699	chr9	50891617	50891717	+	101	Ppp2r1b	protein-coding	-1.57786	-6.22619	9.95e-09	2.09e-06	up-regulated
22239	101966	chr8	84246235	84246693	-	459	D8Ertd738e	protein-coding	0.980177	6.99215	1.02e-08	2.13e-06	up-regulated
22651.3	104112	chr11	100523440	100523621	-	182	Acly	protein-coding	0.471042	5.99856	1.09e-08	2.26e-06	up-regulated
13353.5	67115	chr9	120574095	120574653	+	559	Rpl14	protein-coding	1.38463	6.95209	1.17e-08	2.41e-06	up-regulated
20337	78670	chr10	80796099	80796522	-	424	Plekhj1	protein-coding	0.730952	6.55258	1.18e-08	2.41e-06	up-regulated
6851	26458	chr2	126553024	126553632	+	609	Slc27a2	protein-coding	2.29794	7.15572	1.27e-08	2.58e-06	up-regulated
6851.9	26458	chr2	126587760	126588243	+	484	Slc27a2	protein-coding	-2.29794	-7.15572	1.27e-08	2.58e-06	up-regulated
13720.2	67636	chr6	145215351	145216542	+	1192	Lyrm5	protein-coding	1.7894	7.03572	1.86e-08	3.66e-06	up-regulated
13720	67636	chr6	145211134	145211476	+	343	Lyrm5	protein-coding	-1.7894	-7.03572	1.86e-08	3.66e-06	up-regulated
42102.2	667728	chr13	51205734	51205954	-	221	Hist1h2al	pseudo	-1.2658	-6.92013	2.68e-08	5.11e-06	up-regulated
42102	667728	chr13	51200084	51203062	-	2979	Hist1h2al	pseudo	1.2658	6.92013	2.68e-08	5.11e-06	up-regulated
14000.1	68028	chr3	28806500	28806592	+	93	Rpl22l1	protein-coding	-1.84999	-6.70661	2.72e-08	5.16e-06	up-regulated
13950.1	67945	chr10	128548658	128548680	-	23	Rpl41	protein-coding	-1.09739	-6.52824	2.97e-08	5.57e-06	up-regulated
27422.7	117198	chr1	151355167	151356798	+	1632	Ivns1abp	protein-coding	-0.473873	-5.92828	3.15e-08	5.89e-06	up-regulated
4401.1	19231	chr1	86529173	86529244	+	72	Ptma	protein-coding	-1.0899	-6.38307	3.32e-08	6.15e-06	up-regulated
13956.1	67955	chr14	79628852	79629755	+	904	Sugt1	protein-coding	0.572944	6.29137	3.33e-08	6.15e-06	up-regulated
19114	76582	chr13	106794439	106795795	-	1357	Ipo11	protein-coding	0.402629	5.8934	3.38e-08	6.22e-06	up-regulated
25274	110606	chr12	76837467	76837651	+	185	Fntb	protein-coding	-1.07348	-6.20095	3.57e-08	6.46e-06	up-regulated
3796.6	18176	chr3	103064234	103067914	+	3681	Nras	protein-coding	0.473811	6.35506	3.69e-08	6.66e-06	up-regulated
15393	70549	chr9	67217085	67221518	-	4434	Tln2	protein-coding	0.5919	5.84248	4.29e-08	7.59e-06	up-regulated
2324.3	15289	chr5	149050588	149050751	-	164	Hmgb1	protein-coding	-1.40514	-6.41665	4.46e-08	7.8e-06	up-regulated
2358.9	15382	chr15	103243959	103244028	+	70	Hnrnpa1	protein-coding	-0.93507	-6.02151	4.79e-08	8.29e-06	up-regulated
4172.24	18797	chr19	6965507	6965584	-	78	Plcb3	protein-coding	-1.84824	-5.8121	4.95e-08	8.55e-06	up-regulated
4516.3	19401	chr11	98950245	98950795	+	551	Rara	protein-coding	-0.955731	-5.95877	5.25e-08	8.97e-06	up-regulated
1972.4	14660	chr1	52185281	52187794	-	2514	Gls	protein-coding	0.49873	5.86906	5.82e-08	9.82e-06	up-regulated
2507.9	15926	chr1	65186305	65186479	-	175	Idh1	protein-coding	-1.46426	-5.95272	6.42e-08	1.07e-05	up-regulated
3386.2	17319	chr10	75860061	75860250	-	190	Mif	protein-coding	-0.630757	-6.41226	7.46e-08	1.22e-05	up-regulated
33118.6	276770	chr11	69920341	69920630	-	290	Eif5a	protein-coding	0.839226	6.00848	7.81e-08	1.27e-05	up-regulated
15442.1	70640	chr18	44417566	44424969	+	7404	Dcp2	protein-coding	0.489404	5.83296	9.05e-08	1.45e-05	up-regulated
4929	20084	chr17	33951999	33952118	-	120	Rps18	protein-coding	-1.32123	-6.17304	1.08e-07	1.72e-05	up-regulated
14000.3	68028	chr3	28807187	28807415	+	229	Rpl22l1	protein-coding	1.098	6.27845	1.18e-07	1.86e-05	up-regulated
13577	67427	chr4	3834473	3834683	-	211	Rps20	protein-coding	0.448265	6.14323	1.2e-07	1.9e-05	up-regulated
1462.3	13681	chr11	69668196	69668333	-	138	Eif4a1	protein-coding	-1.08209	-5.76177	1.23e-07	1.93e-05	up-regulated
22239.1	101966	chr8	84249474	84249529	-	56	D8Ertd738e	protein-coding	-1.20698	-6.2458	1.32e-07	2.06e-05	up-regulated
7349.6	27756	chr17	34985417	34985891	+	475	Lsm2	protein-coding	0.746889	6.23941	1.35e-07	2.1e-05	up-regulated
15065.5	69920	chr7	30233285	30233387	+	103	Polr2i	protein-coding	0.770826	5.9799	1.53e-07	2.34e-05	up-regulated
13353.1	67115	chr9	120572096	120572197	+	102	Rpl14	protein-coding	-1.63991	-6.18159	1.65e-07	2.49e-05	up-regulated
3554.1	17765	chr5	108069162	108069523	+	362	Mtf2	protein-coding	0.500088	5.52944	1.71e-07	2.57e-05	up-regulated
28659.8	215201	chrX	134262484	134262884	-	401	Trmt2b	protein-coding	-1.38888	-6.12689	1.99e-07	2.95e-05	up-regulated
22651.2	104112	chr11	100514962	100515098	-	137	Acly	protein-coding	0.523727	5.40967	2.02e-07	2.99e-05	up-regulated
4261.15	19025	chr2	164839151	164841032	+	1882	Ctsa	protein-coding	-0.511473	-5.5998	2.15e-07	3.14e-05	up-regulated
29539.1	227541	chr2	5714146	5714664	-	519	Camk1d	protein-coding	-1.3524	-6.10063	2.17e-07	3.16e-05	up-regulated
29606.1	228026	chr2	71899984	71903858	+	3875	Pdk1	protein-coding	0.668006	5.76247	3.47e-07	4.74e-05	up-regulated
12588	66011	chr11	33211794	33213498	-	1705	Ranbp17	protein-coding	0.560673	5.34606	3.72e-07	4.96e-05	up-regulated
25530.2	110959	chr7	35555154	35555928	-	775	Nudt19	protein-coding	-0.799118	-5.93722	3.8e-07	5.06e-05	up-regulated
13966	67972	chr10	98915152	98915371	+	220	Atp2b1	protein-coding	-1.2832	-5.32564	4.08e-07	5.37e-05	up-regulated
36583	407803	chr17	33908182	33908586	-	405	BC051226	ncRNA	1.4525	6.02704	4.65e-07	6.01e-05	up-regulated
36583.1	407803	chr17	33908744	33909178	-	435	BC051226	ncRNA	-1.4525	-6.02704	4.65e-07	6.01e-05	up-regulated
9524.3	56452	chr8	85303362	85303451	+	90	Orc6	protein-coding	-0.847314	-5.56036	4.7e-07	6.07e-05	up-regulated
18719	75805	chr13	104023439	104025080	-	1642	Nln	protein-coding	0.482634	5.41228	4.81e-07	6.19e-05	up-regulated
2459	15528	chr1	55088148	55088412	+	265	Hspe1	protein-coding	-0.777493	-5.85684	5.01e-07	6.39e-05	up-regulated
12916	66480	chr14	18267823	18269316	-	1494	Rpl15	protein-coding	0.606414	5.85211	5.09e-07	6.47e-05	up-regulated
2358.7	15382	chr15	103242922	103243080	+	159	Hnrnpa1	protein-coding	0.646392	5.45664	5.13e-07	6.5e-05	up-regulated
4261.11	19025	chr2	164837357	164837496	+	140	Ctsa	protein-coding	0.910881	5.37931	5.53e-07	7e-05	up-regulated
2324.2	15289	chr5	149050295	149050440	-	146	Hmgb1	protein-coding	-1.2989	-5.71577	5.63e-07	7.08e-05	up-regulated
3594.9	17865	chr2	163077787	163077889	+	103	Mybl2	protein-coding	-1.32252	-5.39078	5.91e-07	7.41e-05	up-regulated
12792	66311	chr10	30196009	30197226	-	1218	Cenpw	protein-coding	0.86651	5.80557	5.97e-07	7.46e-05	up-regulated
3143.22	16880	chr15	7190546	7197489	+	6944	Lifr	protein-coding	0.320674	5.27799	6.07e-07	7.56e-05	up-regulated
9041	53861	chr3	157534397	157534474	+	78	Zranb2	protein-coding	1.27464	5.43079	6.62e-07	8.12e-05	up-regulated
28311.7	210982	chr17	46824450	46826123	-	1674	Gltscr1l	protein-coding	-0.605525	-5.49727	7.38e-07	8.9e-05	up-regulated
18064	74879	chr9	58455173	58455356	+	184	4930461G14Rik	ncRNA	-1.34169	-5.87796	7.5e-07	9.01e-05	up-regulated
18064.2	74879	chr9	58469145	58469623	+	479	4930461G14Rik	ncRNA	1.34169	5.87796	7.5e-07	9.01e-05	up-regulated
12971	66570	chr15	82233762	82234509	-	748	Cenpm	protein-coding	0.773923	5.61355	8.11e-07	9.7e-05	up-regulated
28945.1	217653	chr12	65161403	65162028	-	626	Mis18bp1	protein-coding	0.596228	5.31193	8.2e-07	9.75e-05	up-regulated
4073.3	18648	chr19	41917606	41918665	+	1060	Pgam1	protein-coding	0.885701	5.64609	1.03e-06	0.00011837	up-regulated
28311	210982	chr17	46798116	46801829	-	3714	Gltscr1l	protein-coding	0.509622	5.40067	1.07e-06	0.000122529	up-regulated
13023.4	66641	chr3	103001708	103003914	+	2207	Sike1	protein-coding	0.696472	5.44311	1.14e-06	0.00012974	up-regulated
21035.6	93790	chr7	55961452	55962493	-	1042	Nipa2	protein-coding	-0.593178	-5.43944	1.16e-06	0.00013064	up-regulated
15065.1	69920	chr7	30232482	30232536	+	55	Polr2i	protein-coding	-1.55529	-5.42479	1.22e-06	0.000137225	up-regulated
13680.3	67574	chrX	144324016	144325197	+	1182	Alg13	protein-coding	-0.613606	-5.08849	1.24e-06	0.000139465	up-regulated
14305.1	68564	chr11	77691542	77693254	+	1713	Nufip2	protein-coding	-0.378197	-5.56723	1.35e-06	0.000148885	up-regulated
14617	69178	chr2	144250123	144251232	-	1110	Snx5	protein-coding	0.326779	5.10562	1.47e-06	0.000161571	up-regulated
22651.8	104112	chr11	100484600	100484727	-	128	Acly	protein-coding	-0.475289	-4.97739	1.52e-06	0.00016604	up-regulated
34140.5	320685	chr8	48138179	48138878	+	700	Dctd	protein-coding	-0.737177	-5.30782	1.52e-06	0.00016604	up-regulated
6622.4	23881	chr5	92063337	92063435	-	99	G3bp2	protein-coding	0.8822	5.09326	1.55e-06	0.000169442	up-regulated
38907.4	622117	chr8	43190069	43190091	+	23	Triml2	protein-coding	-1.47752	-5.24912	1.59e-06	0.000173332	up-regulated
29291.6	224907	chr17	56768348	56768413	+	66	Dus3l	protein-coding	-1.35625	-5.11325	1.68e-06	0.00018099	up-regulated
12911.6	66471	chr3	95945180	95947387	+	2208	Anp32e	protein-coding	0.688082	5.26308	1.8e-06	0.000191485	up-regulated
13288.4	67025	chr4	136052567	136052717	-	151	Rpl11	protein-coding	1.22352	5.47275	1.85e-06	0.0001959	up-regulated
22651	104112	chr11	100476352	100477338	-	987	Acly	protein-coding	-0.266502	-4.93133	1.87e-06	0.000197215	up-regulated
4261.6	19025	chr2	164835156	164835311	+	156	Ctsa	protein-coding	0.765391	5.08452	1.9e-06	0.000199109	up-regulated
38907.6	622117	chr8	43193203	43193884	+	682	Triml2	protein-coding	0.408521	5.20366	1.9e-06	0.000199109	up-regulated
2067.5	14791	chr6	124711876	124712178	-	303	Emg1	protein-coding	0.399292	5.2979	1.95e-06	0.00020324	up-regulated
34065.6	320557	chr13	97106954	97107133	+	180	Fam169a	protein-coding	-0.730212	-5.03088	2.18e-06	0.000225492	up-regulated
6823	26424	chr1	136843584	136845710	-	2127	Nr5a2	protein-coding	0.502414	5.18933	2.38e-06	0.00024206	up-regulated
14319.8	68598	chr4	132553017	132553742	+	726	Dnajc8	protein-coding	0.551307	5.31026	2.39e-06	0.000242068	up-regulated
14167.1	68283	chr9	22424113	22424807	+	695	9530077C05Rik	protein-coding	1.18852	5.37418	2.59e-06	0.000260282	up-regulated
9343.4	56086	chr2	30069327	30069430	+	104	Set	protein-coding	-1.50211	-5.28391	2.62e-06	0.000262953	up-regulated
34873.1	333182	chr7	4752061	4752161	-	101	Cox6b2	protein-coding	-0.840473	-5.33272	2.98e-06	0.000296382	up-regulated
2125	14884	chr7	46796094	46796288	+	195	Gtf2h1	protein-coding	-0.5705	-4.92677	3.12e-06	0.000308568	up-regulated
13588.3	67443	chr8	121596596	121598047	+	1452	Map1lc3b	protein-coding	1.47036	5.42421	3.21e-06	0.00031511	up-regulated
13588.2	67443	chr8	121595986	121596092	+	107	Map1lc3b	protein-coding	-1.47036	-5.42421	3.21e-06	0.00031511	up-regulated
14064.4	68142	chr2	119477379	119477629	-	251	Ino80	protein-coding	-0.709986	-4.81681	3.47e-06	0.00033802	up-regulated
24918.2	110147	chr17	34911363	34911478	+	116	Ehmt2	protein-coding	0.682125	4.80899	3.49e-06	0.00033802	up-regulated
9561.7	56515	chr18	21026086	21028223	+	2138	Rnf138	protein-coding	0.683981	5.08578	3.51e-06	0.000339104	up-regulated
9488.1	56403	chr9	88455582	88456729	-	1148	Syncrip	protein-coding	-0.41549	-4.92106	4.43e-06	0.000419293	up-regulated
34955	353170	chrX	162778919	162781418	-	2500	Txlng	protein-coding	0.619859	5.12268	4.62e-06	0.00043493	up-regulated
23220	106821	chr17	48410080	48410237	+	158	Oard1	protein-coding	0.930386	5.05191	4.77e-06	0.000448205	up-regulated
4235.4	18983	chr8	40507455	40507648	-	194	Cnot7	protein-coding	-0.598012	-5.00206	4.79e-06	0.000449232	up-regulated
12481.2	64291	chr18	12909858	12910002	-	145	Osbpl1a	protein-coding	-0.964648	-4.78211	4.86e-06	0.000454083	up-regulated
3594.12	17865	chr2	163082550	163082699	+	150	Mybl2	protein-coding	-1.6908	-4.86885	4.96e-06	0.000462186	up-regulated
14272	68507	chr1	134296783	134298828	-	2046	Ppfia4	protein-coding	0.823685	4.97808	5.24e-06	0.00048114	up-regulated
6469	22612	chr5	32611171	32611837	+	667	Yes1	protein-coding	-0.494752	-4.84915	5.36e-06	0.000488257	up-regulated
12616.2	66075	chr6	32852145	32852215	-	71	Chchd3	protein-coding	-1.17926	-4.96571	5.48e-06	0.000497027	up-regulated
47202.5	100041433	chr4	146536777	146539395	+	2619	Gm13247	protein-coding	0.599505	4.98792	6.01e-06	0.00053923	up-regulated
12481	64291	chr18	12755312	12756307	-	996	Osbpl1a	protein-coding	0.477534	4.71506	6.42e-06	0.000570429	up-regulated
4929.1	20084	chr17	33952221	33952312	-	92	Rps18	protein-coding	-0.874855	-5.0258	6.48e-06	0.000573865	up-regulated
9196.11	54427	chr10	78056845	78056920	+	76	Dnmt3l	protein-coding	-1.18819	-4.78092	6.5e-06	0.000574789	up-regulated
8873.11	53605	chr10	111494171	111494293	+	123	Nap1l1	protein-coding	-1.51577	-4.87534	6.65e-06	0.000587065	up-regulated
475.1	12190	chr5	150523175	150523279	+	105	Brca2	protein-coding	-1.1875	-4.65663	6.74e-06	0.000592831	up-regulated
3143.17	16880	chr15	7185067	7185343	+	277	Lifr	protein-coding	-0.925717	-4.71085	6.84e-06	0.000599926	up-regulated
29539	227541	chr2	5293457	5299101	-	5645	Camk1d	protein-coding	0.868338	5.08376	6.88e-06	0.000601809	up-regulated
4073	18648	chr19	41911871	41912186	+	316	Pgam1	protein-coding	-0.895557	-5.07699	7.04e-06	0.000612227	up-regulated
6969.1	27176	chr2	26911006	26911126	+	121	Rpl7a	protein-coding	-0.937647	-4.94045	7.13e-06	0.000618049	up-regulated
32997	269954	chr7	80246376	80246663	+	288	Ttll13	protein-coding	-1.57258	-5.14561	7.79e-06	0.000668469	up-regulated
32997.1	269954	chr7	80260329	80260821	+	493	Ttll13	protein-coding	1.57258	5.14561	7.79e-06	0.000668469	up-regulated
9416.2	56295	chr9	121852491	121852609	-	119	Higd1a	protein-coding	-0.693478	-5.03754	8.03e-06	0.000687203	up-regulated
19413	77090	chr8	71371298	71371985	+	688	Ocel1	protein-coding	-0.923912	-5.03703	8.04e-06	0.000687508	up-regulated
14490.2	68949	chr2	167065159	167065217	+	59	Zfos1	protein-coding	-1.12983	-5.02913	8.26e-06	0.000701517	up-regulated
14513.2	68988	chr7	3630845	3630905	+	61	Prpf31	protein-coding	-0.941026	-4.69345	8.62e-06	0.000728273	up-regulated
12519	64660	chr11	5703983	5704732	-	750	Mrps24	protein-coding	0.532356	5.01533	8.65e-06	0.000729153	up-regulated
17265.1	73699	chr9	50879839	50881622	+	1784	Ppp2r1b	protein-coding	0.428913	4.66657	9.06e-06	0.000760726	up-regulated
15434.3	70620	chr16	15594460	15594518	-	59	Ube2v2	protein-coding	-1.42732	-5.09611	9.12e-06	0.000763983	up-regulated
15434	70620	chr16	15550986	15556543	-	5558	Ube2v2	protein-coding	1.42732	5.09611	9.12e-06	0.000763983	up-regulated
25530	110959	chr7	35547185	35548123	-	939	Nudt19	protein-coding	0.629996	4.99448	9.27e-06	0.000775947	up-regulated
12566.9	65257	chr11	31101037	31102704	+	1668	Asb3	protein-coding	1.00417	4.86015	9.51e-06	0.000788054	up-regulated
1462	13681	chr11	69666936	69667617	-	682	Eif4a1	protein-coding	0.270264	4.70334	9.52e-06	0.000788156	up-regulated
3594.1	17865	chr2	163079594	163079707	+	114	Mybl2	protein-coding	-1.33787	-4.6971	9.76e-06	0.00080467	up-regulated
9501.18	56422	chr10	21368289	21368889	+	601	Hbs1l	protein-coding	0.425472	4.68629	1.02e-05	0.000836307	up-regulated
12994.6	66599	chr11	101635748	101636081	+	334	Rdm1	protein-coding	0.436905	4.75658	1.04e-05	0.000848371	up-regulated
2801	16391	chr14	55603985	55604243	+	259	Irf9	protein-coding	-1.35076	-4.82341	1.08e-05	0.000877135	up-regulated
24145	108654	chr18	68260184	68268952	-	8769	Fam210a	protein-coding	0.598147	4.92385	1.17e-05	0.000939148	up-regulated
9357	56176	chr16	94358763	94359174	-	412	Pigp	protein-coding	0.858292	4.84717	1.2e-05	0.000959489	up-regulated
4356	19175	chr11	70525357	70525495	+	139	Psmb6	protein-coding	-0.707347	-4.78246	1.25e-05	0.000996966	up-regulated
28890.2	217232	chr11	104550363	104550620	-	258	Cdc27	protein-coding	0.554541	4.54372	1.3e-05	0.00102099	up-regulated
6729.3	24070	chr11	69657936	69658021	-	86	Mpdu1	protein-coding	-0.824246	-4.69514	1.31e-05	0.00102328	up-regulated
31339.7	245469	chrX	73824282	73824969	-	688	Pdzd4	protein-coding	-0.712809	-4.87636	1.37e-05	0.0010707	up-regulated
10007	59027	chr12	32820335	32820626	+	292	Nampt	protein-coding	-0.626917	-4.60407	1.4e-05	0.00108416	up-regulated
4352.3	19171	chr8	105936866	105936981	-	116	Psmb10	protein-coding	-1.09572	-4.77539	1.54e-05	0.00117763	up-regulated
3601.13	17876	chr2	125110480	125110671	-	192	Myef2	protein-coding	-1.37177	-4.58874	1.6e-05	0.00121494	up-regulated
24145.2	108654	chr18	68275762	68276274	-	513	Fam210a	protein-coding	-0.612913	-4.82939	1.6e-05	0.00121494	up-regulated
12971.4	66570	chr15	82244133	82244336	-	204	Cenpm	protein-coding	-0.84169	-4.75543	1.65e-05	0.0012431	up-regulated
34604.1	329575	chr2	177834251	177834311	-	61	Gm14325	protein-coding	-1.18204	-4.8031	1.75e-05	0.00130075	up-regulated
20138.1	78334	chr10	40479675	40483818	+	4144	Cdk19	protein-coding	0.471591	4.6364	1.83e-05	0.00134935	up-regulated
14953	69724	chr8	84956610	84957864	-	1255	Rnaseh2a	protein-coding	0.358635	4.60391	1.83e-05	0.00134935	up-regulated
4940.4	20116	chr4	117155571	117155677	-	107	Rps8	protein-coding	-0.709583	-4.66746	1.88e-05	0.001383	up-regulated
302.8	11867	chr5	145127636	145127726	+	91	Arpc1b	protein-coding	-0.826376	-4.56133	1.94e-05	0.00141682	up-regulated
15866.1	71330	chr14	59235219	59237265	+	2047	Rcbtb1	protein-coding	0.384007	4.48407	1.97e-05	0.00143724	up-regulated
4235.5	18983	chr8	40510015	40511304	-	1290	Cnot7	protein-coding	-0.463316	-4.61133	2e-05	0.00145738	up-regulated
24155.1	108682	chr8	85525536	85527558	+	2023	Gpt2	protein-coding	-0.315941	-4.54238	2.08e-05	0.00149952	up-regulated
24567.2	109652	chr9	106433567	106433646	-	80	Acy1	protein-coding	-1.22369	-4.59901	2.09e-05	0.00150571	up-regulated
6966	27096	chr4	126262405	126262537	+	133	Trappc3	protein-coding	-0.947106	-4.62215	2.21e-05	0.00157595	up-regulated
9160.18	54366	chr4	56864977	56865211	-	235	Ctnnal1	protein-coding	-0.645769	-4.43471	2.27e-05	0.00161711	up-regulated
35334	381045	chr16	36071660	36072137	+	478	Ccdc58	protein-coding	-0.718652	-4.65519	2.33e-05	0.00164253	up-regulated
39968	630579	chr13	62129890	62130028	+	139	Zfp808	protein-coding	-0.993694	-4.70865	2.39e-05	0.00167828	up-regulated
4910.2	19988	chr5	121205754	121205855	+	102	Rpl6	protein-coding	-1.07895	-4.59171	2.46e-05	0.00172093	up-regulated
19413.3	77090	chr8	71372946	71373689	+	744	Ocel1	protein-coding	0.906269	4.6934	2.51e-05	0.00175448	up-regulated
7839.3	30939	chr11	43425583	43425981	-	399	Pttg1	protein-coding	-0.815886	-4.62455	2.58e-05	0.00179887	up-regulated
22651.2	104112	chr11	100519615	100519805	-	191	Acly	protein-coding	0.357824	4.31609	2.64e-05	0.00182778	up-regulated
3796.3	18176	chr3	103062374	103062533	+	160	Nras	protein-coding	-0.547406	-4.5591	2.75e-05	0.00189361	up-regulated
5974	21672	chr8	84969648	84969762	+	115	Prdx2	protein-coding	-0.737467	-4.55477	2.8e-05	0.0019186	up-regulated
2358.1	15382	chr15	103244256	103244955	+	700	Hnrnpa1	protein-coding	0.482627	4.43429	2.87e-05	0.00196366	up-regulated
4516.11	19401	chr11	98973420	98974942	+	1523	Rara	protein-coding	0.517406	4.41302	2.9e-05	0.00197955	up-regulated
24155.8	108682	chr8	85519448	85519622	+	175	Gpt2	protein-coding	-0.477626	-4.45122	2.91e-05	0.00198417	up-regulated
16278	72017	chr1	134405990	134406053	+	64	Cyb5r1	protein-coding	0.99445	4.44854	2.94e-05	0.00199989	up-regulated
27422.1	117198	chr1	151363112	151364445	+	1334	Ivns1abp	protein-coding	0.309467	4.34073	3.03e-05	0.00204669	up-regulated
18596.4	75617	chr9	44410146	44410406	+	261	Rps25	protein-coding	-1.00015	-4.52719	3.08e-05	0.00207449	up-regulated
22651.1	104112	chr11	100498621	100498762	-	142	Acly	protein-coding	0.437662	4.27273	3.15e-05	0.00211087	up-regulated
36712	432442	chr10	25169090	25171248	-	2159	Akap7	protein-coding	0.645114	4.51272	3.24e-05	0.00214353	up-regulated
6764	26357	chr6	58596672	58597108	+	437	Abcg2	protein-coding	0.625953	4.38913	3.39e-05	0.00223804	up-regulated
4033.1	18597	chrX	160138256	160138336	-	81	Pdha1	protein-coding	-0.943281	-4.40386	3.47e-05	0.00227724	up-regulated
8873.6	53605	chr10	111491009	111491137	+	129	Nap1l1	protein-coding	-1.20824	-4.40118	3.82e-05	0.00247283	up-regulated
15407	70572	chr14	120911194	120911343	+	150	Ipo5	protein-coding	-0.585831	-4.23142	3.84e-05	0.00247928	up-regulated
7991	51813	chr4	21727703	21727915	+	213	Ccnc	protein-coding	-0.701884	-4.42117	3.94e-05	0.00252252	up-regulated
6952.11	27053	chr6	7693109	7693182	-	74	Asns	protein-coding	-0.861357	-4.30024	4e-05	0.00255367	up-regulated
14617.5	69178	chr2	144255340	144255415	-	76	Snx5	protein-coding	-0.92924	-4.28429	4.07e-05	0.00258463	up-regulated
39968.3	630579	chr13	62171150	62173936	+	2787	Zfp808	protein-coding	0.720005	4.546	4.07e-05	0.00258463	up-regulated
20138	78334	chr10	40349308	40349721	+	414	Cdk19	protein-coding	-0.604335	-4.39974	4.25e-05	0.00267813	up-regulated
3432.25	17450	chr16	48626913	48627107	+	195	Morc1	protein-coding	0.537518	4.29275	4.32e-05	0.00270961	up-regulated
18154	75007	chr3	95282935	95283625	+	691	Fam63a	protein-coding	-0.528328	-4.33761	4.42e-05	0.00275449	up-regulated
24155.4	108682	chr8	85509179	85509309	+	131	Gpt2	protein-coding	0.736594	4.33128	4.52e-05	0.00280707	up-regulated
14490.4	68949	chr2	167065687	167065862	+	176	Zfos1	protein-coding	0.603135	4.50234	4.69e-05	0.00290047	up-regulated
480.5	12212	chrX	103389460	103396118	+	6659	Chic1	protein-coding	0.747727	4.49317	4.83e-05	0.00297998	up-regulated
6476.4	22630	chr12	21416798	21417436	-	639	Ywhaq	protein-coding	-0.53371	-4.4887	4.9e-05	0.00301528	up-regulated
22651.2	104112	chr11	100504855	100505009	-	155	Acly	protein-coding	0.375093	4.15766	5e-05	0.00306582	up-regulated
18712.5	75796	chr8	116623784	116624366	-	583	Cdyl2	protein-coding	-0.387805	-4.33711	5.29e-05	0.00320789	up-regulated
12519.2	64660	chr11	5707487	5707555	-	69	Mrps24	protein-coding	-1.05244	-4.45858	5.4e-05	0.00325111	up-regulated
29734.1	229541	chr3	90267413	90267752	+	340	Dennd4b	protein-coding	-0.946538	-4.32862	5.45e-05	0.0032755	up-regulated
14901	69639	chr3	54728679	54728893	-	215	Exosc8	protein-coding	0.572477	4.29996	5.49e-05	0.00329364	up-regulated
18846.8	75991	chr5	72975997	72978828	+	2832	Slain2	protein-coding	0.346129	4.27649	5.51e-05	0.0033014	up-regulated
16370.4	72162	chr3	62472930	62473029	-	100	Dhx36	protein-coding	-1.18202	-4.17466	5.59e-05	0.00334324	up-regulated
29467	226652	chr1	171388960	171389363	+	404	Arhgap30	protein-coding	-1.20219	-4.44615	5.62e-05	0.00335777	up-regulated
4261.2	19025	chr2	164834030	164834208	+	179	Ctsa	protein-coding	0.542716	4.21881	5.69e-05	0.00338903	up-regulated
12846	66384	chr18	34331145	34331259	+	115	Srp19	protein-coding	-1.27742	-4.42939	5.94e-05	0.00352007	up-regulated
23220.1	106821	chr17	48410828	48410904	+	77	Oard1	protein-coding	-0.552409	-4.3193	6.3e-05	0.00368676	up-regulated
3679.28	17999	chr9	72747126	72749848	+	2723	Nedd4	protein-coding	0.143686	4.14623	6.63e-05	0.00385239	up-regulated
23060.8	105787	chr15	5178688	5181899	+	3212	Prkaa1	protein-coding	0.453532	4.28741	7.02e-05	0.00404424	up-regulated
910.1	12857	chr8	120669309	120669382	+	74	Cox4i1	protein-coding	-0.665009	-4.32574	7.04e-05	0.00405362	up-regulated
30251.1	233726	chr7	110027071	110027152	+	82	Ipo7	protein-coding	-1.16355	-4.07659	7.2e-05	0.00412823	up-regulated
29606.8	228026	chr2	71895689	71895799	+	111	Pdk1	protein-coding	-0.917607	-4.26926	7.47e-05	0.00427265	up-regulated
10070.9	60507	chr9	21420036	21420279	+	244	Qtrt1	protein-coding	0.520627	4.21022	7.54e-05	0.00430546	up-regulated
7991.11	51813	chr4	21747483	21747962	+	480	Ccnc	protein-coding	-0.646394	-4.23222	7.63e-05	0.00433786	up-regulated
2324.1	15289	chr5	149049727	149049901	-	175	Hmgb1	protein-coding	-1.00703	-4.2968	7.75e-05	0.00437699	up-regulated
9041.7	53861	chr3	157543158	157543244	+	87	Zranb2	protein-coding	-0.655651	-4.17425	7.95e-05	0.00446574	up-regulated
20092.2	78255	chr1	156901786	156901890	-	105	Ralgps2	protein-coding	-0.808578	-4.18856	8.13e-05	0.00456236	up-regulated
3777.3	18148	chr11	33156003	33156104	-	102	Npm1	protein-coding	-0.934237	-4.1063	8.27e-05	0.00462226	up-regulated
22651.1	104112	chr11	100493884	100494080	-	197	Acly	protein-coding	-0.285735	-4.02375	8.47e-05	0.00470958	up-regulated
13287.2	67023	chr8	71367644	71367693	+	50	Use1	protein-coding	-0.991172	-4.15452	8.53e-05	0.00472604	up-regulated
1448	13653	chr18	34861207	34861786	+	580	Egr1	protein-coding	-1.02102	-4.38174	8.53e-05	0.00472604	up-regulated
1448.1	13653	chr18	34862465	34864956	+	2492	Egr1	protein-coding	1.02102	4.38174	8.53e-05	0.00472604	up-regulated
6222.5	22121	chr7	45127209	45127274	-	66	Rpl13a	protein-coding	-0.741881	-4.22779	8.59e-05	0.00475413	up-regulated
29192.9	224019	chr16	17277972	17278661	+	690	Tmem191c	protein-coding	0.680015	4.16898	8.71e-05	0.00480376	up-regulated
31339	245469	chrX	73793357	73795920	-	2564	Pdzd4	protein-coding	0.523473	4.30792	8.77e-05	0.00482464	up-regulated
9416.3	56295	chr9	121857512	121858000	-	489	Higd1a	protein-coding	-0.673603	-4.30731	8.79e-05	0.00482631	up-regulated
29013	218294	chr13	64192545	64196675	-	4131	Cdc14b	protein-coding	0.725278	4.29221	9.22e-05	0.00501684	up-regulated
27320.1	116904	chr7	81103971	81105612	+	1642	Alpk3	protein-coding	0.657485	4.24166	9.3e-05	0.00505165	up-regulated
402.1	12035	chr6	145048563	145048812	-	250	Bcat1	protein-coding	1.11743	4.06779	9.53e-05	0.00515822	up-regulated
1302.1	13417	chr17	30635321	30635833	+	513	Dnah8	protein-coding	0.467467	3.98217	9.54e-05	0.00515833	up-regulated
9785.2	57320	chr4	150903815	150903884	-	70	Park7	protein-coding	-0.952646	-4.19252	9.68e-05	0.00522002	up-regulated
13577.3	67427	chr4	3835484	3835600	-	117	Rps20	protein-coding	-0.615637	-4.20634	0.000104465	0.00556521	up-regulated
32801.7	268390	chr11	23496691	23496881	-	191	Ahsa2	protein-coding	0.552294	4.11232	0.000106182	0.00564489	up-regulated
18708	75789	chr14	76514558	76515134	-	577	4930444M15Rik	ncRNA	0.658274	4.1932	0.000109065	0.00577466	up-regulated
16646	72661	chr14	76532812	76533246	-	435	Serp2	protein-coding	1.28623	4.29902	0.000109953	0.0058003	up-regulated
16646.3	72661	chr14	76556431	76556687	-	257	Serp2	protein-coding	-1.28623	-4.29902	0.000109953	0.0058003	up-regulated
4910.3	19988	chr5	121206667	121206810	+	144	Rpl6	protein-coding	0.37506	4.15211	0.000110904	0.00583242	up-regulated
2093	14828	chr2	34772090	34772446	+	357	Hspa5	protein-coding	-0.228956	-4.07902	0.000111368	0.00585232	up-regulated
6892	26896	chrX	12675371	12677651	-	2281	Med14	protein-coding	0.489268	3.99723	0.000112421	0.00589408	up-regulated
35700.7	382985	chr15	37953599	37953754	-	156	Rrm2b	protein-coding	-1.09061	-4.2743	0.00011859	0.00615613	up-regulated
35700	382985	chr15	37923952	37927397	-	3446	Rrm2b	protein-coding	1.09061	4.2743	0.00011859	0.00615613	up-regulated
2067.2	14791	chr6	124705158	124705216	-	59	Emg1	protein-coding	-0.847631	-4.12408	0.000121819	0.0063094	up-regulated
6823.6	26424	chr1	136948722	136948859	-	138	Nr5a2	protein-coding	-0.572452	-4.09462	0.000122321	0.00632628	up-regulated
18704.7	75785	chr16	20122906	20127744	+	4839	Klhl24	protein-coding	0.292895	4.09432	0.000122448	0.00632757	up-regulated
12876.1	66420	chr10	80036527	80036598	-	72	Polr2e	protein-coding	-0.968785	-4.08928	0.000124565	0.00640586	up-regulated
30275	233876	chr7	126861972	126862516	+	545	Hirip3	protein-coding	-0.495284	-4.06289	0.000126035	0.0064544	up-regulated
15300.3	70387	chr19	8819021	8819294	-	274	Ttc9c	protein-coding	0.544417	4.1311	0.00013361	0.00679145	up-regulated
20337.5	78670	chr10	80798081	80798626	-	546	Plekhj1	protein-coding	-0.519974	-4.06369	0.00013589	0.00689196	up-regulated
29868.3	230721	chr4	123290199	123290338	+	140	Pabpc4	protein-coding	-1.23628	-3.96545	0.000143592	0.00723963	up-regulated
5413	20823	chr2	69861562	69861739	+	178	Ssb	protein-coding	-0.71117	-3.9736	0.000145422	0.00732109	up-regulated
8873.5	53605	chr10	111490377	111490457	+	81	Nap1l1	protein-coding	-1.21915	-4.01763	0.000147308	0.00740253	up-regulated
27040	114641	chr1	39367851	39368255	+	405	Rpl31	protein-coding	0.421364	4.09939	0.000148129	0.00742108	up-regulated
13760.4	67683	chrX	105082694	105082805	+	112	Pbdc1	protein-coding	-0.826172	-4.14107	0.000149071	0.00744995	up-regulated
4516	19401	chr11	98937696	98937879	+	184	Rara	protein-coding	-1.18829	-3.96576	0.000149527	0.0074673	up-regulated
1314.23	13435	chr12	3907606	3914443	+	6838	Dnmt3a	protein-coding	-0.390794	-3.93373	0.000150232	0.00749702	up-regulated
13956.1	67955	chr14	79624841	79625022	+	182	Sugt1	protein-coding	-0.361289	-4.0329	0.000150829	0.00752131	up-regulated
34140.6	320685	chr8	48140343	48141667	+	1325	Dctd	protein-coding	0.425117	4.02282	0.000156056	0.00774444	up-regulated
729.2	12572	chr13	100706367	100706516	-	150	Cdk7	protein-coding	-0.498909	-3.94797	0.000175877	0.00860973	up-regulated
10045	59288	chr7	122133041	122133181	+	141	Dctn5	protein-coding	-0.889774	-4.01277	0.000176349	0.00862407	up-regulated
400.6	12033	chr12	31634263	31634597	-	335	Bcap29	protein-coding	-1.35673	-4.13811	0.000179453	0.00874457	up-regulated
400	12033	chr12	31595354	31596377	-	1024	Bcap29	protein-coding	1.35673	4.13811	0.000179453	0.00874457	up-regulated
19616	77519	chr9	20495068	20500477	-	5410	Zfp266	protein-coding	0.458316	4.00346	0.000181851	0.00884512	up-regulated
33469	319554	chr13	8885606	8885996	+	391	Idi1	protein-coding	-1.15233	-4.13275	0.000182392	0.00884994	up-regulated
33469.4	319554	chr13	8890318	8892396	+	2079	Idi1	protein-coding	1.15233	4.13275	0.000182392	0.00884994	up-regulated
3551.6	17762	chr11	104306626	104306758	+	133	Mapt	protein-coding	-0.972695	-4.07096	0.00018586	0.00899272	up-regulated
17790.6	74443	chr9	108583642	108583832	-	191	P4htm	protein-coding	-1.0321	-4.02147	0.000190596	0.00918933	up-regulated
616.5	12412	chr11	96808184	96808640	+	457	Cbx1	protein-coding	-0.882838	-3.96061	0.000192382	0.00925586	up-regulated
6233.2	22137	chr9	83869183	83869493	+	311	Ttk	protein-coding	-0.754142	-3.83811	0.000193116	0.00928356	up-regulated
13966.2	67972	chr10	99022808	99026143	+	3336	Atp2b1	protein-coding	0.359062	3.82906	0.000195999	0.00941003	up-regulated
20723	83924	chr13	13357620	13359423	-	1804	Gpr137b	protein-coding	1.02663	4.10839	0.000196329	0.00941266	up-regulated
20723.6	83924	chr13	13393125	13393624	-	500	Gpr137b	protein-coding	-1.02663	-4.10839	0.000196329	0.00941266	up-regulated
9501.13	56422	chr10	21354639	21354743	+	105	Hbs1l	protein-coding	-0.744773	-3.88197	0.000200927	0.0095938	up-regulated
32915.1	269254	chr2	29125852	29125963	+	112	Setx	protein-coding	0.634242	3.7997	0.000201071	0.0095938	up-regulated
5171.8	20469	chr19	5654547	5655156	-	610	Sipa1	protein-coding	-0.619786	-3.97294	0.000201077	0.0095938	up-regulated
2811.3	16407	chr11	73147051	73147449	+	399	Itgae	protein-coding	1.34764	4.09662	0.000203432	0.00967155	up-regulated
2811.25	16407	chr11	73133991	73134834	+	844	Itgae	protein-coding	-1.34764	-4.09662	0.000203432	0.00967155	up-regulated
9370.1	56196	chr13	24832010	24832095	+	86	Tdp2	protein-coding	-0.817237	-3.91994	0.000205622	0.00974879	up-regulated
15866.5	71330	chr14	59223193	59223300	+	108	Rcbtb1	protein-coding	-0.870569	-3.84908	0.00020995	0.00991961	up-regulated
4341.5	19153	chr7	27515251	27520041	+	4791	Prx	protein-coding	0.830329	4.08512	0.000210612	0.00993711	up-regulated
4341.4	19153	chr7	27507947	27508103	+	157	Prx	protein-coding	-0.830329	-4.08512	0.000210612	0.00993711	up-regulated
15491	70769	chr19	46075863	46076149	+	287	Nolc1	protein-coding	-0.461608	-3.84687	0.000211606	0.00997027	up-regulated
9350.4	56095	chr11	106250348	106250433	-	86	Ftsj3	protein-coding	-0.662824	-3.80253	0.000212438	0.00998882	up-regulated
13438	67236	chr12	110872610	110874129	-	1520	Cinp	protein-coding	0.406464	3.98262	0.000215954	0.0101333	up-regulated
38828	621427	chr6	39420378	39420652	+	275	Gm10244	unknown	-1.14965	-4.07359	0.000218057	0.0102039	up-regulated
38828.1	621427	chr6	39420740	39421294	+	555	Gm10244	unknown	1.14965	4.07359	0.000218057	0.0102039	up-regulated
4352	19171	chr8	105935728	105935905	-	178	Psmb10	protein-coding	0.599266	3.97081	0.000224291	0.0104172	up-regulated
28419.6	212442	chr1	13660329	13660509	-	181	Lactb2	protein-coding	-0.472568	-3.89249	0.000225642	0.0104516	up-regulated
16370	72162	chr3	62468642	62470747	-	2106	Dhx36	protein-coding	0.324639	3.79257	0.000232337	0.0107036	up-regulated
4917	20018	chr5	147077541	147077693	+	153	Polr1d	protein-coding	-0.666394	-3.99826	0.000233279	0.0107398	up-regulated
29192	224019	chr16	17276300	17276468	+	169	Tmem191c	protein-coding	-1.16439	-3.86531	0.0002473	0.0113167	up-regulated
6064.9	21849	chr7	13029088	13029124	+	37	Trim28	protein-coding	-0.96135	-3.76885	0.000248307	0.0113552	up-regulated
9561	56515	chr18	21001341	21001540	+	200	Rnf138	protein-coding	-1.27755	-3.87944	0.000252161	0.011516	up-regulated
29013.1	218294	chr13	64274591	64274988	-	398	Cdc14b	protein-coding	-0.785833	-3.96957	0.000255062	0.0116097	up-regulated
3143.3	16880	chr15	7154387	7154547	+	161	Lifr	protein-coding	-0.590979	-3.76986	0.000257364	0.011665	up-regulated
17790	74443	chr9	108578826	108579308	-	483	P4htm	protein-coding	0.780266	3.92388	0.000260589	0.0117541	up-regulated
7349.1	27756	chr17	34982130	34982367	+	238	Lsm2	protein-coding	-0.623357	-3.96208	0.000261063	0.0117643	up-regulated
475	12190	chr5	150522623	150523090	+	468	Brca2	protein-coding	-0.527839	-3.73421	0.00026181	0.0117835	up-regulated
19249	76813	chr8	70220192	70220877	-	686	Armc6	protein-coding	0.392736	3.85326	0.000274992	0.0123039	up-regulated
14167.4	68283	chr9	22435095	22435400	+	306	9530077C05Rik	protein-coding	-1.05183	-3.9384	0.000280952	0.0125459	up-regulated
36712.3	432442	chr10	25267308	25267468	-	161	Akap7	protein-coding	-0.840764	-3.86989	0.000281552	0.0125645	up-regulated
13415.4	67204	chr2	154878470	154878564	-	95	Eif2s2	protein-coding	-1.16572	-3.82433	0.000283764	0.0126385	up-regulated
3756	18117	chr8	120653914	120658248	-	4335	Emc8	protein-coding	0.322443	3.89598	0.000284789	0.0126596	up-regulated
6622.11	23881	chr5	92082750	92082917	-	168	G3bp2	protein-coding	-0.875197	-3.74705	0.000292528	0.0129613	up-regulated
21702	98386	chr1	181815315	181817018	-	1704	Lbr	protein-coding	0.258039	3.74897	0.000298614	0.0131712	up-regulated
3432.22	17450	chr16	48618502	48618651	+	150	Morc1	protein-coding	0.549903	3.74341	0.000313856	0.0137459	up-regulated
22651.9	104112	chr11	100492505	100492615	-	111	Acly	protein-coding	-0.361881	-3.67418	0.000315888	0.0138163	up-regulated
6034.2	21815	chr17	70849640	70849790	-	151	Tgif1	protein-coding	-0.724836	-3.83398	0.000316272	0.0138163	up-regulated
30808.1	239839	chr16	34721737	34721869	+	133	Ccdc14	protein-coding	-0.826897	-3.78901	0.000319262	0.0138848	up-regulated
13680.1	67574	chrX	144319899	144320061	+	163	Alg13	protein-coding	-0.556591	-3.68618	0.000333806	0.0143802	up-regulated
6222.2	22121	chr7	45126478	45126537	-	60	Rpl13a	protein-coding	-1.29255	-3.81455	0.000336747	0.0144795	up-regulated
23648.3	108075	chr7	27329571	27329818	-	248	Ltbp4	protein-coding	-0.909325	-3.68539	0.00034061	0.0145814	up-regulated
22759.1	104263	chr6	71600723	71600875	-	153	Kdm3a	protein-coding	0.475667	3.65469	0.000345549	0.0147467	up-regulated
9144.2	54217	chr17	56613907	56614041	+	135	Rpl36	protein-coding	-0.666526	-3.86647	0.000350767	0.0149042	up-regulated
20092.2	78255	chr1	156907639	156907778	-	140	Ralgps2	protein-coding	-0.717705	-3.75716	0.000354885	0.0150325	up-regulated
3551.11	17762	chr11	104327972	104332096	+	4125	Mapt	protein-coding	0.592383	3.85632	0.000361886	0.0152817	up-regulated
33325.3	319277	chr10	83594171	83596473	+	2303	A230046K03Rik	protein-coding	0.305358	3.64572	0.000373974	0.0157488	up-regulated
40605.4	664994	chr7	4891994	4892111	+	118	Isoc2a	protein-coding	-0.554406	-3.80121	0.000384249	0.0161165	up-regulated
2357	15381	chr14	52073380	52075160	-	1781	Hnrnpc	protein-coding	0.358989	3.71528	0.000387719	0.0162095	up-regulated
8490	52670	chr11	113698171	113698666	-	496	Cpsf4l	protein-coding	0.700488	3.79113	0.000396607	0.0165234	up-regulated
34955.5	353170	chrX	162790612	162790806	-	195	Txlng	protein-coding	-0.577205	-3.78969	0.000398405	0.016568	up-regulated
3778.4	18150	chr19	45749057	45749142	-	86	Npm3	protein-coding	-1.0109	-3.76086	0.000400118	0.016619	up-regulated
23685.3	108143	chr13	100655034	100656060	+	1027	Taf9	protein-coding	0.285451	3.7836	0.000406087	0.0168362	up-regulated
5220.4	20529	chr4	62388598	62391769	+	3172	Slc31a1	protein-coding	0.519028	3.81794	0.000407055	0.0168661	up-regulated
10028.3	59052	chr7	121057215	121057399	+	185	Mettl9	protein-coding	-0.781656	-3.74841	0.000416372	0.0171639	up-regulated
28935.8	217558	chr12	51363186	51363310	+	125	G2e3	protein-coding	-0.692372	-3.64285	0.000420416	0.017294	up-regulated
6222.4	22121	chr7	45126991	45127092	-	102	Rpl13a	protein-coding	0.358161	3.74194	0.000425073	0.0174226	up-regulated
7349	27756	chr17	34981854	34982085	+	232	Lsm2	protein-coding	-0.533194	-3.79003	0.000443272	0.017947	up-regulated
1822.9	14390	chr16	84860375	84863779	+	3405	Gabpa	protein-coding	0.236025	3.66154	0.000444855	0.0179961	up-regulated
29061	218885	chr14	32085728	32086053	+	326	Oxnad1	protein-coding	-0.525307	-3.68572	0.000449109	0.0181253	up-regulated
13023	66641	chr3	102995740	102995967	+	228	Sike1	protein-coding	-0.655489	-3.72126	0.000454034	0.0182809	up-regulated
12962	66552	chr2	126890391	126894286	-	3896	Sppl2a	protein-coding	0.557277	3.71652	0.000460942	0.0185263	up-regulated
34065.1	320557	chr13	97126496	97129522	+	3027	Fam169a	protein-coding	0.281751	3.61963	0.000466543	0.0186995	up-regulated
14272.3	68507	chr1	134332290	134332928	-	639	Ppfia4	protein-coding	-0.772788	-3.68797	0.000471878	0.0188992	up-regulated
16370.2	72162	chr3	62496729	62496899	-	171	Dhx36	protein-coding	-0.575028	-3.58534	0.00048347	0.0192395	up-regulated
13598	67456	chr6	148179318	148181739	-	2422	Ergic2	protein-coding	0.379147	3.6467	0.000486844	0.0193441	up-regulated
29291.2	224907	chr17	56766782	56767288	+	507	Dus3l	protein-coding	0.360818	3.61211	0.00049171	0.0194654	up-regulated
5933.25	21453	chr18	60848751	60848964	-	214	Tcof1	protein-coding	-0.632245	-3.56126	0.000492045	0.0194674	up-regulated
22689.6	104156	chr16	22411633	22411920	-	288	Etv5	protein-coding	0.384066	3.66234	0.000512509	0.0200507	up-regulated
28357.1	211586	chr9	96306800	96306951	+	152	Tfdp2	protein-coding	-0.618945	-3.62721	0.000519138	0.0201781	up-regulated
28357	211586	chr9	96196275	96196560	+	286	Tfdp2	protein-coding	-0.472358	-3.61984	0.000531885	0.0205559	up-regulated
480	12212	chrX	103356476	103356889	+	414	Chic1	protein-coding	-0.685319	-3.72781	0.000535541	0.0206855	up-regulated
4018.12	18574	chr15	103526984	103527092	+	109	Pde1b	protein-coding	-0.91145	-3.64149	0.000547995	0.0210122	up-regulated
1306.3	13423	chr8	84909526	84909690	+	165	Dnase2a	protein-coding	0.916267	3.66166	0.000548487	0.0210193	up-regulated
29868.2	230721	chr4	123288959	123289074	+	116	Pabpc4	protein-coding	-1.06926	-3.57626	0.000554828	0.0212029	up-regulated
24144	108653	chr6	122453609	122456663	-	3055	Rimklb	protein-coding	0.314955	3.65475	0.000560594	0.0213516	up-regulated
13942.1	67936	chr18	36761977	36762077	+	101	Wdr55	protein-coding	-0.676926	-3.61335	0.000568607	0.0216087	up-regulated
15491.1	70769	chr19	46084012	46085530	+	1519	Nolc1	protein-coding	0.217074	3.56103	0.000569144	0.0216171	up-regulated
13021	66637	chr1	152370735	152371283	-	549	Tsen15	protein-coding	0.710857	3.70704	0.000570261	0.0216453	up-regulated
6729	24070	chr11	69656704	69657328	-	625	Mpdu1	protein-coding	0.306561	3.61164	0.000571783	0.0216571	up-regulated
12876.2	66420	chr10	80036764	80036842	-	79	Polr2e	protein-coding	-0.717684	-3.62588	0.000576097	0.0217723	up-regulated
32995.1	269951	chr7	80095621	80095713	-	93	Idh2	protein-coding	-0.700518	-3.56368	0.000578751	0.0218243	up-regulated
14827.8	69527	chr1	42899441	42899549	+	109	Mrps9	protein-coding	-0.590412	-3.6149	0.000596672	0.0223277	up-regulated
52606.3	100503974	chr7	126808870	126809249	-	380	Gm15676	protein-coding	-1.48905	-3.73026	0.000604432	0.0225256	up-regulated
52606	100503974	chr7	126800790	126800994	-	205	Gm15676	protein-coding	1.48905	3.73026	0.000604432	0.0225256	up-regulated
1462.4	13681	chr11	69668405	69668548	-	144	Eif4a1	protein-coding	-0.615978	-3.55786	0.000607361	0.022604	up-regulated
6966.2	27096	chr4	126272975	126273074	+	100	Trappc3	protein-coding	-0.861259	-3.62857	0.000608755	0.0226248	up-regulated
1302.56	13417	chr17	30754974	30755187	+	214	Dnah8	protein-coding	-0.924566	-3.48204	0.000610293	0.0226599	up-regulated
31052.5	242553	chr4	98774674	98774892	-	219	Kank4	protein-coding	-0.790295	-3.62611	0.000613484	0.0227328	up-regulated
7991.1	51813	chr4	21730397	21730503	+	107	Ccnc	protein-coding	-1.0133	-3.59716	0.000631401	0.0233	up-regulated
24237.8	109079	chr2	4906581	4910557	+	3977	Sephs1	protein-coding	0.280757	3.59707	0.0006316	0.0233	up-regulated
28156.4	208836	chr7	79449073	79449180	+	108	Fanci	protein-coding	-0.498869	-3.48684	0.000631858	0.0233	up-regulated
15444	70645	chr2	119609532	119610364	-	833	Oip5	protein-coding	0.75849	3.67162	0.000634523	0.0233731	up-regulated
4261.7	19025	chr2	164835630	164835721	+	92	Ctsa	protein-coding	-0.730911	-3.53597	0.000634923	0.0233752	up-regulated
43032.1	672511	chr11	119402525	119402691	+	167	Rnf213	protein-coding	0.532191	3.44646	0.000645024	0.0236199	up-regulated
30192.4	233073	chr7	30564203	30564301	+	99	U2af1l4	protein-coding	-0.864325	-3.60992	0.000645464	0.0236234	up-regulated
28357.1	211586	chr9	96294965	96295127	+	163	Tfdp2	protein-coding	-0.603379	-3.54997	0.000668326	0.0242395	up-regulated
17405.1	73914	chr10	120201327	120201537	-	211	Irak3	protein-coding	-0.993054	-3.5962	0.000673798	0.0243862	up-regulated
9779.6	57312	chr8	22429181	22429665	+	485	Mrps31	protein-coding	0.419769	3.56824	0.000692208	0.02496	up-regulated
24250	109161	chr9	55149369	55149826	+	458	Ube2q2	protein-coding	-0.428754	-3.63896	0.000699907	0.0251713	up-regulated
15522.2	70829	chr1	121501190	121506460	+	5271	Ccdc93	protein-coding	1.01255	3.67398	0.000712185	0.0255456	up-regulated
15522	70829	chr1	121431067	121431257	+	191	Ccdc93	protein-coding	-1.01255	-3.67398	0.000712185	0.0255456	up-regulated
22946.1	105239	chr13	54688031	54688200	-	170	Rnf44	protein-coding	-1.18902	-3.50719	0.000718092	0.0257036	up-regulated
23394.2	107522	chr16	20645060	20645915	+	856	Ece2	protein-coding	1.28844	3.59557	0.000727322	0.0258579	up-regulated
3777.4	18148	chr11	33156664	33156747	-	84	Npm1	protein-coding	-0.742912	-3.48631	0.000731061	0.0259639	up-regulated
34962.1	353211	chr19	17178790	17178990	+	201	Prune2	protein-coding	0.694444	3.54925	0.000735104	0.0260804	up-regulated
15081	69956	chr6	71880638	71881231	-	594	Ptcd3	protein-coding	0.386286	3.46421	0.000743518	0.0263478	up-regulated
3446.5	17532	chr9	99436310	99436712	-	403	Mras	protein-coding	-0.628242	-3.56437	0.000744183	0.0263478	up-regulated
1462.1	13681	chr11	69667695	69667774	-	80	Eif4a1	protein-coding	-0.662802	-3.49584	0.000745375	0.0263627	up-regulated
4892.4	19899	chr7	45720294	45720487	+	194	Rpl18	protein-coding	-0.930829	-3.55967	0.000755159	0.0266536	up-regulated
9144.1	54217	chr17	56613586	56613680	+	95	Rpl36	protein-coding	0.597247	3.61338	0.000755593	0.0266551	up-regulated
28945.1	217653	chr12	65172449	65172580	-	132	Mis18bp1	protein-coding	-0.673411	-3.49136	0.000756424	0.0266707	up-regulated
12481.2	64291	chr18	12892167	12892289	-	123	Osbpl1a	protein-coding	-0.878517	-3.45062	0.000766599	0.0269322	up-regulated
12650	66121	chr14	20703027	20703197	+	171	Chchd1	protein-coding	-0.952813	-3.60516	0.000774361	0.0271352	up-regulated
3625.2	17916	chr17	33598143	33598312	+	170	Myo1f	protein-coding	-1.1253	-3.55129	0.000775101	0.0271472	up-regulated
24155.9	108682	chr8	85521339	85521494	+	156	Gpt2	protein-coding	-0.43086	-3.50296	0.000778139	0.0272397	up-regulated
19426	77117	chr13	62516797	62518730	-	1934	Zfp934	protein-coding	0.841626	3.63094	0.000806861	0.0280246	up-regulated
19426.4	77117	chr13	62558487	62558599	-	113	Zfp934	protein-coding	-0.841626	-3.63094	0.000806861	0.0280246	up-regulated
570	12349	chr3	14886426	14886786	+	361	Car2	protein-coding	-0.471027	-3.51808	0.000811044	0.028118	up-regulated
18999.3	76295	chr3	35855105	35856276	+	1172	Atp11b	protein-coding	0.370976	3.44763	0.0008142	0.0281691	up-regulated
23107	106064	chr15	3982035	3986479	-	4445	AW549877	protein-coding	0.544525	3.55847	0.000814579	0.0281691	up-regulated
19263.1	76843	chr1	191575349	191575534	-	186	Dtl	protein-coding	-0.547703	-3.4711	0.000832938	0.0285728	up-regulated
16942.3	73242	chr17	35899829	35900872	-	1044	Atat1	protein-coding	-1.12799	-3.5761	0.0008444	0.0289224	up-regulated
30335.2	234413	chr8	71966100	71966160	+	61	Zfp961	protein-coding	-0.908201	-3.56535	0.000871813	0.0295945	up-regulated
34605	329581	chr2	180929023	180929513	+	491	Birc7	protein-coding	0.940142	3.56452	0.000873979	0.0296238	up-regulated
14513.3	68988	chr7	3632668	3632751	+	84	Prpf31	protein-coding	-0.640916	-3.42959	0.000881978	0.0298358	up-regulated
30335.3	234413	chr8	71967899	71970333	+	2435	Zfp961	protein-coding	0.474959	3.55713	0.000893357	0.030145	up-regulated
6610.4	23856	chr2	180671392	180671914	-	523	Dido1	protein-coding	0.303605	3.40492	0.000893819	0.030145	up-regulated
9528.1	56456	chr3	32720435	32720515	+	81	Actl6a	protein-coding	-0.694511	-3.41717	0.000900657	0.030273	up-regulated
4940	20116	chr4	117153836	117153987	-	152	Rps8	protein-coding	0.264575	3.4896	0.000938087	0.031285	up-regulated
5407.6	20815	chr17	28600243	28600456	-	214	Srpk1	protein-coding	0.362575	3.40902	0.000943646	0.0313995	up-regulated
4047	18612	chr11	101769742	101770590	-	849	Etv4	protein-coding	0.292375	3.42977	0.000951786	0.0316184	up-regulated
4751.3	19652	chrX	8143658	8143751	-	94	Rbm3	protein-coding	-0.866764	-3.45124	0.00095517	0.0316624	up-regulated
15208.6	70209	chr7	45916083	45916272	+	190	Tmem143	protein-coding	0.868003	3.47228	0.000989442	0.0324437	up-regulated
24918.3	110147	chr17	34913640	34914047	+	408	Ehmt2	protein-coding	0.250529	3.35141	0.00100429	0.032711	up-regulated
30800.8	239759	chr16	21983901	21984268	-	368	Liph	protein-coding	-0.336998	-3.41101	0.00101083	0.032876	up-regulated
12747.1	66254	chr13	106958655	106960224	+	1570	Dimt1	protein-coding	0.91971	3.48711	0.00101128	0.032876	up-regulated
15442.1	70640	chr18	44395873	44396024	+	152	Dcp2	protein-coding	-0.509091	-3.4007	0.00101591	0.032995	up-regulated
13573.1	67420	chr7	113568095	113570458	+	2364	Far1	protein-coding	0.300243	3.40739	0.00102262	0.0331817	up-regulated
9345.6	56088	chr16	95990754	95990903	-	150	Psmg1	protein-coding	-0.418694	-3.4431	0.00102541	0.0332563	up-regulated
29033.5	218490	chr13	98316625	98317006	-	382	Btf3	protein-coding	-0.628084	-3.50967	0.00102801	0.033309	up-regulated
9460	56364	chrX	101404384	101405803	-	1420	Zmym3	protein-coding	0.318129	3.36341	0.00105666	0.0340597	up-regulated
28156.2	208836	chr7	79432114	79432215	+	102	Fanci	protein-coding	0.82228	3.3346	0.00106272	0.0342229	up-regulated
5412	20822	chr1	143750790	143757894	-	7105	Trove2	protein-coding	0.477198	3.49799	0.001064	0.0342479	up-regulated
13771	67701	chr2	164562716	164562804	+	89	Wfdc2	protein-coding	-0.844229	-3.44021	0.00109159	0.0350206	up-regulated
8889.1	53625	chr11	22859494	22859735	-	242	B3gnt2	protein-coding	-0.686799	-3.52439	0.00109622	0.0350868	up-regulated
8889	53625	chr11	22834739	22837195	-	2457	B3gnt2	protein-coding	0.686799	3.52439	0.00109622	0.0350868	up-regulated
7559.12	28036	chr3	127553183	127553349	-	167	Larp7	protein-coding	-0.60744	-3.37647	0.00109831	0.0351206	up-regulated
20744.2	84113	chr7	44864383	44864487	-	105	Ptov1	protein-coding	-0.609386	-3.37381	0.00110772	0.0353389	up-regulated
6358	22321	chr17	35000907	35001232	+	326	Vars	protein-coding	-0.74534	-3.31106	0.0011131	0.0354444	up-regulated
12962.1	66552	chr2	126926817	126926999	-	183	Sppl2a	protein-coding	-0.686361	-3.4315	0.00112101	0.0356446	up-regulated
5175	20474	chr12	73100259	73104238	-	3980	Six4	protein-coding	0.338658	3.4785	0.00112677	0.0357299	up-regulated
3143.1	16880	chr15	7173391	7173560	+	170	Lifr	protein-coding	-0.49412	-3.33332	0.00114896	0.0362656	up-regulated
29291.7	224907	chr17	56768518	56768628	+	111	Dus3l	protein-coding	-0.62245	-3.35391	0.00115317	0.0363412	up-regulated
9501.11	56422	chr10	21351927	21352044	+	118	Hbs1l	protein-coding	-0.656484	-3.35603	0.00117264	0.0368427	up-regulated
28759	216233	chr10	95411490	95413110	-	1621	Socs2	protein-coding	0.552316	3.4639	0.00117609	0.0369004	up-regulated
5451.7	20877	chr11	69050900	69051662	+	763	Aurkb	protein-coding	0.275686	3.37708	0.00120532	0.0376965	up-regulated
6469.11	22612	chr5	32684551	32687066	+	2516	Yes1	protein-coding	0.256228	3.34666	0.0012083	0.0377724	up-regulated
20577.1	80886	chr11	69681663	69681970	-	308	Senp3	protein-coding	-0.378347	-3.36423	0.0012104	0.0378204	up-regulated
29598	227960	chr2	62664327	62664459	+	133	Gca	protein-coding	-1.06583	-3.42285	0.00122647	0.0381136	up-regulated
24155.1	108682	chr8	85523256	85523368	+	113	Gpt2	protein-coding	-0.543386	-3.35151	0.00125977	0.0389184	up-regulated
13353.3	67115	chr9	120573576	120573675	+	100	Rpl14	protein-coding	-1.01681	-3.43505	0.00127969	0.0394625	up-regulated
469	12177	chr14	66985240	66987775	-	2536	Bnip3l	protein-coding	0.371347	3.42607	0.00131366	0.0402019	up-regulated
7980	51793	chr17	35059035	35059272	+	238	Ddah2	protein-coding	-0.66934	-3.37665	0.00132436	0.0404389	up-regulated
1462.2	13681	chr11	69668022	69668111	-	90	Eif4a1	protein-coding	-0.651033	-3.31617	0.00133145	0.0405647	up-regulated
13577.1	67427	chr4	3834936	3835009	-	74	Rps20	protein-coding	-0.660713	-3.39169	0.00134582	0.0409113	up-regulated
3756.4	18117	chr8	120667757	120668112	-	356	Emc8	protein-coding	-0.304785	-3.39106	0.00134836	0.0409702	up-regulated
20653.5	83383	chr16	4551935	4552100	-	166	Tfap4	protein-coding	-0.6935	-3.3645	0.00137391	0.0416171	up-regulated
16254.9	71981	chr7	35523938	35524074	-	137	Tdrd12	protein-coding	-0.926997	-3.38211	0.00138471	0.0418701	up-regulated
27320.4	116904	chr7	81077546	81078833	+	1288	Alpk3	protein-coding	-0.571725	-3.37548	0.00141221	0.0424575	up-regulated
9205.3	54484	chr6	39401210	39401424	-	215	Mkrn1	protein-coding	-0.222017	-3.3366	0.0014237	0.0426626	up-regulated
4261.8	19025	chr2	164836427	164836511	+	85	Ctsa	protein-coding	-0.775141	-3.28787	0.00142457	0.0426626	up-regulated
4068.5	18642	chr15	98120791	98120980	+	190	Pfkm	protein-coding	0.579854	3.28051	0.00143033	0.0427197	up-regulated
19139	76626	chr11	88339382	88344660	-	5279	Msi2	protein-coding	0.413792	3.36743	0.00144634	0.0431047	up-regulated
3777.2	18148	chr11	33154925	33155220	-	296	Npm1	protein-coding	0.24571	3.2732	0.00146408	0.0435575	up-regulated
30800	239759	chr16	21953817	21956177	-	2361	Liph	protein-coding	0.270887	3.29246	0.00147174	0.0436332	up-regulated
12792.1	66311	chr10	30198466	30198579	-	114	Cenpw	protein-coding	-0.612298	-3.38404	0.00148445	0.043896	up-regulated
29567.2	227695	chr2	30175187	30175289	-	103	D2Wsu81e	protein-coding	-0.729978	-3.3043	0.00151006	0.0444248	up-regulated
1665.7	14137	chr14	63177683	63177793	-	111	Fdft1	protein-coding	-0.570664	-3.29203	0.00151669	0.0445861	up-regulated
13760.5	67683	chrX	105083016	105085186	+	2171	Pbdc1	protein-coding	0.484885	3.37657	0.00151692	0.0445861	up-regulated
6641.8	23918	chr9	108563596	108563691	+	96	Impdh2	protein-coding	-1.05953	-3.40836	0.0015241	0.0447011	up-regulated
6641.9	23918	chr9	108564635	108564778	+	144	Impdh2	protein-coding	1.05953	3.40836	0.0015241	0.0447011	up-regulated
4018.3	18574	chr15	103521306	103521488	+	183	Pde1b	protein-coding	0.806642	3.3114	0.00153736	0.0450513	up-regulated
12747.6	66254	chr13	106951818	106951941	+	124	Dimt1	protein-coding	-1.045	-3.34202	0.00155922	0.0454968	up-regulated
3450.11	17536	chr2	116063188	116063420	-	233	Meis2	protein-coding	-0.769163	-3.36506	0.00156831	0.045723	up-regulated
20724	83925	chr15	50654757	50661736	-	6980	Trps1	protein-coding	0.385945	3.33865	0.00157478	0.0458921	up-regulated
31341.1	245474	chrX	75108696	75109776	+	1081	Dkc1	protein-coding	0.21932	3.25609	0.00157551	0.0458939	up-regulated
8873	53605	chr10	111473192	111473351	+	160	Nap1l1	protein-coding	-0.931356	-3.28717	0.00159162	0.046245	up-regulated
3540	17748	chr8	94179089	94179338	+	250	Mt1	protein-coding	0.819365	3.39116	0.0015998	0.0463202	up-regulated
3540.2	17748	chr8	94180102	94180327	+	226	Mt1	protein-coding	-0.819365	-3.39116	0.0015998	0.0463202	up-regulated
781	12662	chrX	113040592	113043635	-	3044	Chm	protein-coding	0.492129	3.35807	0.00160031	0.0463202	up-regulated
6610.9	23856	chr2	180674968	180675427	-	460	Dido1	protein-coding	0.271447	3.22718	0.00160179	0.0463344	up-regulated
20642.3	81904	chr7	3365947	3366092	+	146	Cacng7	protein-coding	-0.768465	-3.35536	0.00161291	0.0465863	up-regulated
22239.2	101966	chr8	84249616	84249761	-	146	D8Ertd738e	protein-coding	-0.639935	-3.35206	0.00162835	0.0469925	up-regulated
23031.2	105638	chr14	32085410	32085665	-	256	Dph3	protein-coding	-0.460716	-3.37721	0.00166381	0.0477779	up-regulated
23031	105638	chr14	32080562	32083246	-	2685	Dph3	protein-coding	0.460716	3.37721	0.00166381	0.0477779	up-regulated
28139	208643	chr16	20672749	20672876	+	128	Eif4g1	protein-coding	-0.396641	-3.18752	0.00166395	0.0477779	up-regulated
30275.3	233876	chr7	126863169	126864250	+	1082	Hirip3	protein-coding	0.273447	3.26835	0.00168605	0.0483312	up-regulated
22759.2	104263	chr6	71621345	71621447	-	103	Kdm3a	protein-coding	-0.772202	-3.19286	0.00168685	0.0483341	up-regulated
1565.1	13990	chr6	65043206	65043445	+	240	Smarcad1	protein-coding	-0.257261	-3.19706	0.00169954	0.0486364	up-regulated
24918.1	110147	chr17	34906151	34906294	+	144	Ehmt2	protein-coding	-0.645816	-3.19201	0.00170256	0.0486618	up-regulated
40605.1	664994	chr7	4891184	4891330	+	147	Isoc2a	protein-coding	0.436608	3.30142	0.00175707	0.0498239	up-regulated
