# Supplementary material for: Transcriptional repression by FACT is linked to regulation of chromatin accessibility at the promoter of ES cells
Source: Life Sci Alliance. 2018 Jun 13;1(3):e201800085. doi: 10.26508/lsa.201800085 (PMC6238418; doi:10.26508/lsa.201800085)
Supplement: Supplementary file 5 [file LSA-2018-00085_TableS5.xlsx]

## Sheet: H3K4me3_IP.Ssrp1_KD_6
H3K4me3 IP / Mass spectrometry (Ssrp1 KD vs Control)
log2 enrichment (DK/Control)	adj P Val	Significance 5 FDR	Protein IDs	Protein names	Gene names	catalytic step 2 spliceosome	spliceosomal complex	nuclear speck
-0.19668	0.693866		A0A067XG47;A0A023T672;Q9CWZ3-2;Q9CWZ3;A0A0G2JEA9;A0A0G2JFX7	RNA-binding protein 8A	RBM8;Rbm8a		+	+
-1.42407	3.33682	+	A0A087WNP3
0.486475	0.79558		A0A087WNW7
-0.201613	0.80818		A0A087WP63;A0A087WNX7;A0A087WNL7;A0A087WQ44;A0A087WQY5;E9Q8G3;E9Q9V7;Q8BQA6;A0A087WSL6;A0A087WS36
1.35878	1.66989	+	A0A087WP83;Q8VDJ3;A0A087WQY9;A0A087WPC5;A0A087WS92;A0A087WPH2	Vigilin	Hdlbp
0.151188	0.244998		A0A087WPE4;A0A087WQE6;A0A087WNT1;P83940	Transcription elongation factor B polypeptide 1	Tceb1
-2.71944	4.22202	+	A0A087WQA0;F8WI22;Q8K019-3;Q8K019-2;Q8K019;A0A087WRN1	Bcl-2-associated transcription factor 1	Bclaf1
0.0688575	0.198734		A0A087WQB0;P60762-2;P60762	Mortality factor 4-like protein 1	Morf4l1
0.925107	1.44714	+	A0A087WQF8;A0A087WP48;A0A087WS04;A0A087WS29;A0A087WQG4;A0A087WQD0;A0A087WNW3;A0A087WQI3;A0A087WPW5;A0A087WS23;A0A087WQ25;A0A087WRS1;A0A087WQQ5;A0A087WP85;A0A087WP14;A0A087WPX0;F8VQC7;Q61595-2;Q61595-12;Q61595-16;Q61595-3;Q61595-14;Q61595-6;Q61595-4;Q61595-9;Q61595-8;Q61595-13;Q61595-5;Q61595-15;Q61595-10;Q61595-7;Q61595-11;Q61595	Kinectin	Ktn1
2.27392	2.90927	+	A0A087WS46;O70251;M0QWK5;M0QWH8;G3UX43;G3UZ47	Elongation factor 1-beta	Eef1b;Eef1b2
1.01297	1.31617	+	A0A0A0MQ89;Q80US4;V9GXE4	Actin-related protein 5	Actr5
2.36684	1.73474	+	A0A0A0MQM0;Q8BGY2;P63242	Eukaryotic translation initiation factor 5A-2;Eukaryotic translation initiation factor 5A-1	Eif5a2;Eif5a
0.223087	0.230768		A0A0A0MQM3;F2Z456;Q9DCN2-2;Q9DCN2	NADH-cytochrome b5 reductase 3;NADH-cytochrome b5 reductase 3 membrane-bound form;NADH-cytochrome b5 reductase 3 soluble form	Cyb5r3
0.710873	1.01658		A0A0A6YVS2;Q921L3	Transmembrane and coiled-coil domain-containing protein 1	Tmco1
-0.257007	1.29957		A0A0B4J1E2;Q9CSN1	SNW domain-containing protein 1	Snw1	+	+
-0.314022	0.369554		A0A0B4J1F2;A0A0B4J1M9;P27546-2;P27546;P27546-3;A0A0G2JG35;A0A0G2JFH2;A0A0G2JFK3;A0A0G2JDY5;A0A0G2JFT4;E9PZ43;A0A0G2JDN7;P27546-4;A0A0G2JE57;A0A0G2JDU1	Microtubule-associated protein 4;Microtubule-associated protein	Map4
0.501905	1.81264	+	A0A0G2JDL9;Q99JI6;P62835;A0A0G2JED9;A0A0G2JE52	Ras-related protein Rap-1b;Ras-related protein Rap-1A	Rap1b;Rap1a
1.8156	2.79745	+	A0A0G2JDP0;O35387;A0A0G2JE46;A0A0G2JGR0;A0A0G2JFF9;A0A0G2JFE1;A0A0G2JEE6	HCLS1-associated protein X-1	Hax1
1.26069	3.46832	+	A0A0G2JDV8;Q9DAW9;A0A0G2JFI6;A0A0G2JFC8;A0A0G2JFG3;D3Z7R6;Q08093	Calponin-3	Cnn3
-0.816917	2.08141	+	A0A0G2JDW7;A0A0G2JG29;Q6ZWU9	40S ribosomal protein S27	Rps27
0.101108	0.0997321		A0A0G2JEW4;Q80SY5;A0A0G2JGW4	Pre-mRNA-splicing factor 38B	Prpf38b		+
-0.325418	0.923908		A0A0G2JF16;Q8R344;A0A0G2JFK6	Coiled-coil domain-containing protein 12	Ccdc12
0.498887	1.65931	+	A0A0G2JF72;Q8JZN2;Q91W50;A0A0G2JDJ7;A0A0G2JE62	Cold shock domain-containing protein E1	Csde1
-0.086095	0.158379		A0A0G2JFJ6;Q7TPD0;Q7TPD0-2	Integrator complex subunit 3	Ints3
-1.01458	3.13218	+	A0A0G2JFV9;Q9JHI7	Exosome complex component RRP45	Exosc9
-0.305883	0.935971		A0A0G2JFW6;Q6NXI6-2;Q6NXI6;A0A0G2JFN1	Regulation of nuclear pre-mRNA domain-containing protein 2	Rprd2
0.335288	1.40109	+	A0A0G2JFY0;A0A0A0MQ80;Q3UMC0;D3Z0U5;D6RGM7;D3Z4J2;Q9D3R6-3;Q9D3R6	Spermatogenesis-associated protein 5	Spata5
-0.451635	1.06086		A0A0G2JGI2;A0A0G2JEV2;O35216;D6RJ71;D6RCV6;A0A0G2JEV0	Histone H3-like centromeric protein A	Cenpa
1.15244	1.61191	+	A0A0G2JGQ4;P54729	NEDD8 ultimate buster 1	Nub1
0.559518	2.81206	+	A1BN54;Q7TPR4;O88990	Alpha-actinin-1	Actn1
-0.450232	1.4342	+	A2A432-2;A2A432;E9PXY1;J3QJX0;Q3TCH7	Cullin-4B	Cul4b
-0.840845	3.80534	+	A2A4N9;A2A4P0	ATP-dependent RNA helicase DHX8	Dhx8	+	+
-0.0096125	0.0354655		A2A547;P84099	Ribosomal protein L19;60S ribosomal protein L19	Rpl19
0.431113	1.76296	+	A2A5R8;Q9DBE7;A2A5S3;Q9Z108;V9GX87	Double-stranded RNA-binding protein Staufen homolog 1	Stau1
1.82861	3.47583	+	A2A6Q5;A2A6Q5-2;A2A6Q5-3;Q8R568	Cell division cycle protein 27 homolog	Cdc27
-0.198405	0.914068		A2A791-2;A2A791;F6VYE2	Zinc finger MYM-type protein 4	Zmym4
-0.575677	1.54591	+	A2A7B5		Prdm2
-0.244767	0.460281		A2A7T8;Q3TJB1;A2A7U0		Zmym1
-0.952745	3.71268	+	A2ADB1;A2ADB0;Q62504-3;Q62504-2;Q62504	Msx2-interacting protein	Spen
0.457693	0.516748		A2AEW0;A2AEW1;Q64092-3;Q64092-2;Q64092-4;Q64092;D3Z6Q7;F6W7D6;E9PZ28;E9QL92;Q3U2D2;Q3UKG7;Q08874-5;Q08874-9;Q08874-8;Q08874-7;Q08874-2;Q9R210;Q08874-4;Q08874;Q9WTW4;Q08874-6;Q08874-3	Transcription factor E3;Microphthalmia-associated transcription factor;Transcription factor EB	Tfe3;Tfeb;Mitf
0.610988	1.0549		A2AFF6;O35638;Q3UQG8	Cohesin subunit SA-2	Stag2
0.350255	1.84637	+	A2AFJ1;Q60973;A2AFI9;F6ZLC6;F6U539	Histone-binding protein RBBP7	Rbbp7
2.06651	4.96857	+	A2AFQ0;Q7TMY8-4;Q7TMY8-3;Q7TMY8;Q7TMY8-2;F6XP90	E3 ubiquitin-protein ligase HUWE1	Huwe1
0.547048	1.5346	+	A2AFQ9;E9PUU4;Q8BX17	Gem-associated protein 5	Gemin5
-2.38874	2.77527	+	A2AG22;O88933;A0A0A6YWN6;Q9CY80;G3UZ44;F6UTR6;A2APZ7;A2AIK5;G3UYF8;P63013-2;Q8BYH0-2;P63013;Q06348;Q8BYH0;Q62066;O35690;P70390-2;O09113;Q8C8B0;P70390;O35602;O70137;O35137;O08934;O35085		Esx1
-0.949695	4.03903	+	A2AG58;A2AG58-2;Z4YLY4;A2AG55	Uncharacterized protein CXorf23 homolog
2.38469	4.15347	+	A2AH25;Q5FWK3	Rho GTPase-activating protein 1	Arhgap1
0.124982	0.511534		A2AJ72;Q3TIX6;A0A0A6YVV5;F7AM43;A2AJ71;A0A0A6YY39;A0A0A6YX76		Fubp3
0.0736175	0.176029		A2AL12;Q8BG05;V9GX38;A2AL13	Heterogeneous nuclear ribonucleoprotein A3	Hnrnpa3		+
-0.219665	0.603168		A2AL50;Q8C0I1;H3BKN2;A2AL49;H3BIY5	Alkyldihydroxyacetonephosphate synthase, peroxisomal	Agps
-0.6187	2.68686	+	A2ALB2;Q6PAQ4;A2ALB1	RNA exonuclease 4	Rexo4
-0.38311	1.10432		A2ALR9;Q3V0C5;Q3V0C5-5;Q3V0C5-2;A2ALR8;Q3V0C5-4;Q3V0C5-3;F6VSP0;F6TGT8	Ubiquitin carboxyl-terminal hydrolase 48	Usp48
2.69695	1.30702	+	A2ALW2		Zkscan16
1.00564	1.1597		A2AMW0;P47757-2;P47757;P47757-4;A0A0A0MQI9;F6YHZ8;F7CAZ6	F-actin-capping protein subunit beta	Capzb
0.770132	2.15325	+	A2AN08-3;A2AN08;A2AN08-5;Z4YMA7;A2AN08-4;A2AN08-2	E3 ubiquitin-protein ligase UBR4	Ubr4
-1.02789	3.38893	+	A2APB8	Targeting protein for Xklp2	Tpx2
-0.168855	0.757445		A2API8;F7AA26;O54931-2;O54931;O54931-5;O54931-4;O54931-3;A2APJ1;A2API9	A-kinase anchor protein 2	Akap2;Palm2Akap2
-0.161032	0.51077		A2AQA7;Q8CFQ3	Intron-binding protein aquarius	Aqr	+	+
-0.246452	0.273977		A2AR02;A2AR01	Peptidyl-prolyl cis-trans isomerase G;Peptidyl-prolyl cis-trans isomerase	Ppig			+
0.257028	1.21032		A2AS45;Q68FH0-2;Q68FH0;A2AS44;A2AS47;Q68FH0-3;V9GXG7;E9QKH8;O35927-2;O35927	Plakophilin-4	Pkp4
1.22358	2.8639	+	A2ATU9;Q8BY71	Histone acetyltransferase type B catalytic subunit	Hat1
-0.539743	1.22869		A2AUM9	Centrosomal protein of 152 kDa	Cep152
1.00719	3.49839	+	A2AUY4		Baz2b
-1.00203	1.11247		A2AVJ7;Q99PL5;Q99PL5-12;Q99PL5-11;Q99PL5-10;Q99PL5-9;Q99PL5-8;Q99PL5-7;Q99PL5-6;Q99PL5-5;Q99PL5-4;Q99PL5-3;Q99PL5-2	Ribosome-binding protein 1	Rrbp1
-0.59642	2.06332	+	A2AW05;Q08943;Q08943-2	FACT complex subunit SSRP1	Ssrp1
-0.751705	0.666873		A2AWF2;A2A7V0;A2A7U9;A2A9J5;H3BLB0		Rex2;Zfp600;Gm13242;Gm13150
0.723365	3.78646	+	A2AWT5;P25976	Nucleolar transcription factor 1	Ubtf
-0.780663	3.01909	+	A2BDX0;Q9Z103	Activity-dependent neuroprotector homeobox protein	Adnp
1.39267	1.91994	+	A2BDX2;O70152;F8WII3	Dolichol-phosphate mannosyltransferase subunit 1	Dpm1
0.223255	0.302126		A2BE28-2;A2BE28	Ribosomal biogenesis protein LAS1L	Las1l
0.004165	0.0122475		A2BGI8;Q4G0C5;Q9D868-2;Q9D868;A2BGI9	Peptidyl-prolyl cis-trans isomerase;Peptidyl-prolyl cis-trans isomerase H	Ppih		+	+
-0.428345	1.9361	+	A2CG76;Q9Z148-2;Q9Z148-3;Q9Z148;A2CG77	Histone-lysine N-methyltransferase EHMT2	Ehmt2
-0.54193	2.28147	+	A2RSY6;A2RSY6-2;A2RSY6-3;A0A087WQ23	TRMT1-like protein	Trmt1l
-0.758525	1.34284	+	A3KGQ6;Q9D898	Actin-related protein 2/3 complex subunit 5;Actin-related protein 2/3 complex subunit 5-like protein	Arpc5l
0.160285	0.141799		A6H8H2;A6H8H2-2;E9Q449	DENN domain-containing protein 4C	Dennd4c
-1.68128	2.58367	+	A6PWE1;E9Q284;Q5SU73	Coilin	Coil
-1.21018	0.993566		A7KBS4	Zinc finger and SCAN domain containing protein 4D	Zscan4d
-0.37401	0.982524		B1AQJ2;B0QZF8	Ubiquitin carboxyl-terminal hydrolase 36	Usp36
1.23801	2.51538	+	B1AU25;Q9Z0X1	Apoptosis-inducing factor 1, mitochondrial	Aifm1
0.293013	0.910876		B1AU76;B1AU75;Q99MD9;Q99MD9-2	Nuclear autoantigenic sperm protein	Nasp
-0.120133	0.491877		B1AUX2;Q61191;F6SJS2;F6T088	Host cell factor 1;HCF N-terminal chain 1;HCF N-terminal chain 2;HCF N-terminal chain 3;HCF N-terminal chain 4;HCF N-terminal chain 5;HCF N-terminal chain 6;HCF C-terminal chain 1;HCF C-terminal chain 2;HCF C-terminal chain 3;HCF C-terminal chain 4;HCF C-terminal chain 5;HCF C-terminal chain 6	Hcfc1
-1.39384	3.72061	+	B1AVB1;B1AVB2;B1AVB4;E9Q796;B1AVB5;B1AVB3		Scml2
1.51025	2.63759	+	B1AWE0;Q6PFA2;B1AWE1;B1AWD8;B1AWD9;O08585	Clathrin light chain A	Clta
-0.547203	2.24151	+	B1AWL2;B1AWL4;B1AWL5		Zfp462
0.391817	0.40258		B1AXS6;B1AXS8;B1AXS7;Q9JLM4	Zinc finger MYM-type protein 3	Zmym3
-0.59947	2.39056	+	B1AYU7;Q8C5N3-2;Q8C5N3;B1AYU4;A2AK44;A2AK42;B1AYU8;J3QNR0;J3QM48;B1AYU9	Pre-mRNA-splicing factor CWC22 homolog	Cwc22;Gm13695;Gm13697	+	+	+
-0.402857	2.59423	+	B1AZI6;E9Q5E2;F6SBF2;Q8C690	THO complex subunit 2	Thoc2;BC005561			+
1.41462	1.7795	+	B1B0C7;E9PZ16;Q05793	Basement membrane-specific heparan sulfate proteoglycan core protein;Endorepellin;LG3 peptide	Hspg2
-0.312343	1.59966	+	B2M1R6;P61979-3;P61979;P61979-2;H3BKD0;H3BLL4;D3Z5X4;D3YWG1;H3BK96;H3BKI8;H3BLP7;Q8BT23;H3BJS9;H3BJ43	Heterogeneous nuclear ribonucleoprotein K	Hnrnpk;Gm7964	+	+
-1.34593	5.0265	+	B2RQG2;A0A087WP76;A0A087WS81		Phf3
-0.305887	0.928182		B2RRD7;E9PXP1;Q80XK2;Q3U109;B2KF05		Brpf1
-0.136382	0.251067		B2RRE7;G3UXM1	OTU domain-containing protein 4	Otud4
-0.47662	1.6552	+	B2RRF6	Zinc finger protein 518A	Znf518a
0.602797	2.84655	+	B2RUP0;Q8C5L7	RNA-binding protein 34	Rbm34
-0.481925	2.76682	+	B2RY56;S4R2B0;S4R2A4;S4R2J1;S4R1X9;S4R2F7	RNA-binding protein 25	Rbm25			+
0.353485	2.26786	+	B7FAV1;B7FAU9;Q8BTM8;F6XC15;Q8BTM8-2;J3JS91;F6Z2C0	Filamin-A	Flna
0.571675	2.54063	+	B7ZCF1;O88685;A2AGN7;A0A087WPH7;F6Q2E3	26S protease regulatory subunit 6A	Psmc3
-1.63612	4.82572	+	B9EHJ3;P39447	Tight junction protein ZO-1	Tjp1
-0.739152	2.4516	+	B9EJ54;E9Q880		Nup205
0.551983	1.03596		D3YTP8;Q9CY46;Q9QXA5	U6 snRNA-associated Sm-like protein LSm4	Lsm4		+
-0.699	1.82596	+	D3YTQ3;F6VQH5;Q9Z130	Heterogeneous nuclear ribonucleoprotein D-like	Hnrnpdl
1.61808	3.95884	+	D3YTQ9;F7ANJ3		Rps15
0.07847	0.251067		D3YTR4		Mbd3
-0.582307	2.56709	+	D3YUW8;D3YUX1;Q0VGT3;Q8BZH4	Pogo transposable element with ZNF domain	Pogz
1.7632	4.07974	+	D3YVF2;Q9JJ78	Lymphokine-activated killer T-cell-originated protein kinase	Pbk
0.419998	1.6558	+	D3YVL0;E9PW39;P23249	Putative helicase MOV-10	Mov10
0.742258	3.1013	+	D3YVN7;Q8BFR5;Q8BFR5-2	Elongation factor Tu;Elongation factor Tu, mitochondrial	Gm9755;Tufm
-0.0169	0.0466313		D3YVU7;D3YVU4;E9QL25;Q6P1G2-2;Q6P1G2;F6QTG9	Lysine-specific demethylase 2B	Kdm2b
-1.79628	1.70484	+	D3YW87;D3Z576;Q8VHX6-2;Q8VHX6	Filamin-C	Flnc
0.141355	0.540129		D3YWT0;D3YTS1;Q9R0P6;D3Z569	Signal peptidase complex catalytic subunit SEC11A	Sec11a
-0.070665	0.168386		D3YWT1;D3Z3N4;D3Z6Y3		Hnrnph3
-1.55288	4.35642	+	D3YWX2;F6YTL8;E9Q803;Q9R0I7		Ylpm1
-0.857703	2.51525	+	D3YXK0		Jakmip2
0.394905	1.4834	+	D3YXK1	Atherin	Samd1
1.16338	4.33406	+	D3YXW1;Q9D945-2;Q9D945	Protein LLP homolog	Llph
-0.0872575	0.185274		D3YYI8;O09106	Histone deacetylase;Histone deacetylase 1	Gm10093;Hdac1
-1.10675	4.73403	+	D3YYT1;Q922P9	Putative oxidoreductase GLYR1	Glyr1
0.0483025	0.176296		D3YZ08;O35144;E9QM06;O35144-2;F6VIR4	Telomeric repeat-binding factor 2	Terf2
-0.0474125	0.160574		D3YZ09;Q9CY66-3;Q9CY66-2;Q9CY66;F6SL78	H/ACA ribonucleoprotein complex subunit 1	Gar1
0.79591	1.08268		D3YZ19;Q6PI63;D3YZ20;O08740	DNA-directed RNA polymerase II subunit RPB11	Polr2j
0.575675	1.91786	+	D3YZ62;D3Z4J3;Q99104;B8JK05;F6Z2S4;F6TDE5	Unconventional myosin-Va	Myo5a
-0.950865	2.77527	+	D3YZC2;F8WHD9;O88559-2;O88559;F7CJP6	Menin	Men1
-0.202923	1.04028		D3YZC9;D3YZD0;Q64213;E9Q4Q2;Q64213-2;Q64213-3;F8WHF9;D3YVH4;D6RDB7;F6YR19	Splicing factor 1	Sf1		+
0.397675	0.593776		D3YZX8;P49962	Signal recognition particle 9 kDa protein	Srp9
0.379035	0.921745		D3Z061;Q8C7R4	Ubiquitin-like modifier-activating enzyme 6	Uba6
-1.00543	4.22994	+	D3Z0M9		Ddx23	+	+
0.0517625	0.095465		D3Z0S6;Q62189;D6RI83	U1 small nuclear ribonucleoprotein A	Snrpa		+
0.083725	0.0509723		D3Z0X3;Q9WUV0	Origin recognition complex subunit 5	Orc5
-0.0302675	0.0873479		D3Z131;D3Z132;Q5U4D9;F6S2T7;D3YUL7	THO complex subunit 6 homolog	Thoc6			+
-0.593398	3.2308	+	D3Z1N4;E9Q4Y5;F8VQD1;E9Q7L3;D3Z1W6;E9Q7L2;Q8BSQ9-2;Q8BSQ9;D3YYF2;F6THL5;D3Z3R4;D6RIL0;D6RI94	Protein polybromo-1	Pbrm1
0.94838	3.37783	+	D3Z315;O89079;E9Q6I5;F6YFR7	Coatomer subunit epsilon	Cope
0.889458	0.863556		D3Z3N1;F8WIA0;Q8BHA0	INO80 complex subunit C	Ino80c
1.39139	1.83052	+	D3Z3R3;P97930	Thymidylate kinase	Dtymk
0.2248	0.236689		D3Z4A4;Q61171	Peroxiredoxin-2	Prdx2
-0.66509	0.721619		D3Z4B0;Q3UIX4;F6RDI8;E9Q6E5		Srsf11
-1.09873	3.51579	+	D3Z4V2;Q9D824-3;Q9D824-2;Q9D824;D3Z619;D3Z3F1;Q9D824-4	Pre-mRNA 3-end-processing factor FIP1	Fip1l1
0.22984	0.933785		D3Z5I1;Q3UPF5-2;Q3UPF5;G3X9X5	Zinc finger CCCH-type antiviral protein 1	Zc3hav1
-0.63224	1.53448	+	D3Z5N6;Q61103;F8WIP7	Zinc finger protein ubi-d4	Dpf2
0.02139	0.0121793		D3Z5T2;Q9D0L7;Q9D0L7-2	Armadillo repeat-containing protein 10	Armc10
0.684928	2.01733	+	D3Z687;Q9DCT6-2;Q9DCT6;F8WH46;F6XN97;F6S0D5;H3BJI0	Chromatin complexes subunit BAP18	0610010K14Rik;Bap18
0.595888	1.63235	+	D3Z6Z0;Q78ZM0;D3Z789;O70492	Sorting nexin-3	Snx3
-0.03341	0.0803888		D3Z774;Q6AXH7;Q61188-2;Q61188;E9PWK3;P70351	Histone-lysine N-methyltransferase EZH2	Ezh2
2.26779	3.16385	+	D3Z7B5;Q8BWY9	Protein CIP2A	C330027C09Rik;Kiaa1524
0.560612	0.289025		D3Z7C6;Q9R0Q7	Prostaglandin E synthase 3	Ptges3
1.02729	2.21209	+	D6REF7;Q8R0X7;D3YZT4;D3YY13;D3Z1Z3	Sphingosine-1-phosphate lyase 1	Sgpl1
1.41972	3.26819	+	D6RFR0;B1B0C9;Q9R0G8	Nik-related protein kinase	Nrk
-1.04527	2.20994	+	D6RH49;D3YYB0;Q6ZWY3	40S ribosomal protein S27;40S ribosomal protein S27-like	Rps27l
0.269655	1.10894		E0CX20;Q6PGH1		Bud31		+
-2.0737	4.28182	+	E0CYH0;Q9ER69;F7CCI4;Q9ER69-2;E0CZF5	Pre-mRNA-splicing regulator WTAP	Wtap			+
0.45926	2.45315	+	E0CZ72;P28740-2;P28740;P28740-1;F8VQ42;F6SUU5;Q9D481	Kinesin-like protein KIF2A	Kif2a
-0.212407	0.475746		E9PU93;Q91X20;D3YYA0;D6RI55;D6RET1	Set1/Ash2 histone methyltransferase complex subunit ASH2	Ash2l
0.333645	1.5901	+	E9PU96;Q571H0;Q571H0-2	Nucleolar pre-ribosomal-associated protein 1	Urb1
-0.074475	0.29457		E9PUA5;G3UX22		Kifc5b
1.63177	4.67044	+	E9PUD2;Q8K1M6-3;Q8K1M6-2;Q8K1M6;Q8K1M6-4;Q8K1M6-5	Dynamin-1-like protein	Dnm1l
1.5275	2.66532	+	E9PUF7;Q61210-3;Q61210-4;Q61210-2;Q61210;Q61210-5;F6ZN61;D3YVJ9	Rho guanine nucleotide exchange factor 1	Arhgef1
-0.30161	1.62631	+	E9PVA2;Q9DB85	Ribosomal RNA-processing protein 8	Rrp8
1.73503	2.15683	+	E9PVC5;E9PVC6;E9Q9E1;Q6NZJ6;Q6NZJ6-2;E9Q770;D3YWY7;D3YWM1;D3Z439;A2AMI7;Z4YKC4;A2AMI2;Q80XI3-2;Q80XI3-4;Q80XI3;Q80XI3-3	Eukaryotic translation initiation factor 4 gamma 1	Eif4g1
-0.888725	3.71984	+	E9PVX6		Mki67
-0.442395	2.14227	+	E9PW20;Q9CY57-5;Q9CY57-4;Q9CY57-3;Q9CY57-2;Q9CY57;D3YZA1;D3Z7T7	Chromatin target of PRMT1 protein	Chtop			+
1.16078	4.65644	+	E9PW66;P28656	Nucleosome assembly protein 1-like 1	Nap1l1
0.812468	1.5346	+	E9PWC8;E9PZR3;Q61183-4;Q61183-3;Q61183;E9Q5Z1;E9PVN7;E9QAY4;F6VTN8;E9QAN2;Q61183-2	Poly(A) polymerase alpha	Papola
1.01653	1.09677		E9PWU7;O35231-2;O35231	Kinesin-like protein KIFC3	Kifc3
1.06604	2.7923	+	E9PWV3;Q505N6;F6RQA2;F6Q8A4;P18653;G3UZI3	Ribosomal protein S6 kinase;Ribosomal protein S6 kinase alpha-1	Rps6ka1
0.206038	1.02777		E9PWW9;E9Q4Y2		Rsf1
1.09978	4.5355	+	E9PWY9;Q8C0C7;D6RIJ2	Phenylalanine--tRNA ligase alpha subunit	Farsa
-0.333498	0.156378		E9PY85;Q99L28;G3UW80;G3UZF1	Probable ribosome biogenesis protein RLP24	Rsl24d1;Gm20509
2.10293	4.07467	+	E9PYI8;Q9JMA1	Ubiquitin carboxyl-terminal hydrolase;Ubiquitin carboxyl-terminal hydrolase 14	Usp14
-0.194658	0.371035		E9PYL9;Q9CXW4;A2BH06	60S ribosomal protein L11	Gm10036;Rpl11
-0.211728	0.680825		E9PZ26;G5E8P1;E9Q412		Brd1
-0.340135	0.69102		E9PZ97;O88700	Bloom syndrome protein homolog	Blm
-0.100473	0.164056		E9PZA7;E9QLK7;E9PWT1;F7CGG2;Q80YV3;D3YY11	Transformation/transcription domain-associated protein	Trrap
-1.07559	2.57945	+	E9PZM7		Scaf11
-2.11059	2.05896	+	E9PZY8;A2AIV2;A2AIV2-2	Protein virilizer homolog	1110037F02Rik;Kiaa1429			+
0.0842575	0.325105		E9Q070		Gm8730
0.65532	1.57309	+	E9Q0A7;Q4KMM3-3;Q4KMM3-2;Q4KMM3-4;Q4KMM3;B1H3M0	Oxidation resistance protein 1	Oxr1
0.777355	1.17746		E9Q0U7;Q61699-2;Q61699;D3Z027;D3Z3I9	Heat shock protein 105 kDa	Hsph1
-1.0684	2.31474	+	E9Q109;Q9CXK8	60S ribosome subunit biogenesis protein NIP7 homolog	Nip7
-0.146423	0.723535		E9Q166		Atad2b
0.310265	0.765758		E9Q186;Q9CTH6	rRNA-processing protein FCF1 homolog	Fcf1
-0.6265	1.36068	+	E9Q1C9;L7N452		Gm10323;Zfp640
1.94694	1.87881	+	E9Q1T9;Q9ERK4;E9QAX7;F6ZEW4	Exportin-2	Cse1l
-0.39418	1.56299	+	E9Q286	Little elongation complex subunit 1	Ice1
1.11169	3.09721	+	E9Q2H1;Q80TP3	E3 ubiquitin-protein ligase UBR5	Ubr5
0.827638	0.382928		E9Q2I6;Q8BGE7;D3Z676;D3YY77;D3Z7U8	Tripartite motif-containing protein 6	Trim6
0.325672	1.37585	+	E9Q2N1;Q921C3-2;Q921C3;F6X674;F6WJH7	Bromodomain and WD repeat-containing protein 1	Brwd1
0.224702	1.0769		E9Q2X6;Q8CG47;A0A0A6YXY3;Q3U763	Structural maintenance of chromosomes protein;Structural maintenance of chromosomes protein 4	Smc4
-0.142533	0.304525		E9Q2Z4;J3QM43;A3KGL9;B7ZCQ3;F6W687;P09602;Q5XK38	Non-histone chromosomal protein HMG-17	Gm16494;Gm6594;Hmgn2
-0.0614125	0.180417		E9Q317;O55128;D3YY73;D3Z2N9;D3YY55	Histone deacetylase complex subunit SAP18	Gm10094;Sap18			+
-1.46959	1.99647	+	E9Q392;Q9QXK2;F6ZKR0;D3Z734;D3Z733;W4VSP9	E3 ubiquitin-protein ligase RAD18	Rad18
0.848365	2.9124	+	E9Q3B5;P62876	DNA-directed RNA polymerases I, II, and III subunit RPABC5	Gm10774;Polr2l
-0.283815	0.688743		E9Q3F7;Q7TN75;H3BJQ1;H3BL51;Q7TN75-2	Retrotransposon-derived protein PEG10	Peg10
-0.278562	1.42807	+	E9Q3G0		Zscan4b
-0.811453	3.24154	+	E9Q3G8		Nup153
-0.0169175	0.0494722		E9Q3P4;E9PY14;E9Q776		Cenpf
1.22152	2.65276	+	E9Q3V6;P42208;F6UKN5;D3Z1S1;F6WYM0;D3YYB1;D3Z3C0	Septin-2	2017-09-02
-0.831185	1.19991		E9Q453;G5E8R2;E9Q456;G5E8R0;G5E8R1;E9Q455;E9Q448;B7ZNL3;S4R261		Tpm1
1.48514	1.26426		E9Q4K7;A2AKI2;Q3V3Y9;E9Q9B0;F8VQ75;O35071;B1AVY7;Q9EQW7;Q80TF6		Kif13b
-0.404238	1.66937	+	E9Q4T0;E9QKG8;Q6PG16-3;Q6PG16-2;Q6PG16;D6RI36	Holliday junction recognition protein	Hjurp
-0.61812	0.30558		E9Q4V5;K9J7E2		Gm4312
0.567847	0.994925		E9Q4Y4		Cep192
-1.28937	2.9682	+	E9Q532;A2A7F4		Rlf
-0.768755	3.72061	+	E9Q557;E9PZW0	Desmoplakin	Dsp
0.385053	1.54591	+	E9Q5B0;Q80VC9-2;Q80VC9	Calmodulin-regulated spectrin-associated protein 3	Camsap3
-1.78134	4.68203	+	E9Q5C9		Nolc1
-0.951793	2.81206	+	E9Q5F9-2;E9Q5F9;A0A0G2JEZ4;A0A0G2JH06;A0A0G2JDZ6	Histone-lysine N-methyltransferase SETD2	Setd2
-0.470797	2.48933	+	E9Q5G3	Kinesin-like protein KIF23	Kif23
1.23218	1.48774	+	E9Q5H2;E9PZF5;P97822-2;P97822	Acidic leucine-rich nuclear phosphoprotein 32 family member E	Anp32e
-0.59069	2.73581	+	E9Q5K9-3;E9Q5K9-2;E9Q5K9;D6RG95	YTH domain-containing protein 1	Ythdc1
-1.52476	2.06332	+	E9Q5X9;Q80V81		Zfp819
-1.30537	3.61238	+	E9Q616		Ahnak
0.110312	0.202404		E9Q634;G3V011;Q8CG29;P70248	Unconventional myosin-Ie	Myo1e
-1.06633	2.94586	+	E9Q6A3;E9PYX6;E9QNA7;D3Z5J3;Q62417-5;Q62417-6;Q62417-4;Q62417-3;Q62417-2;Q62417;Q62417-7	Sorbin and SH3 domain-containing protein 1	Sorbs1
0.47736	2.81819	+	E9Q6A7;A2A655;A2A654;A2A652;A2A653		Bptf
-0.10753	0.20879		E9Q6R7;A2A9Z1;A2A9Z2;B1AV35;Q05AA6		Utrn
1.02365	4.50747	+	E9Q6W4		Zfp296
1.44539	1.51761	+	E9Q6Z0;E9PV12;G3X914;Q9D5V5	Cullin-5	Cul5
-0.3593	0.952685		E9Q7E2;Q9D982		Arid2
-0.490853	2.82961	+	E9Q7G0;F6ZQA3		Numa1
-0.12144	0.330924		E9Q7H5;J3QNY1;Q8BG05-2;B2RXM2	Heterogeneous nuclear ribonucleoprotein A3	Gm8991;Gm9242;Hnrnpa3;Gm6793	+	+
0.28411	1.21032		E9Q7L1;G3UX45		Urb2
-0.899092	3.80102	+	E9Q7S1;R4GML0;O88466;O88466-2;O88466-3;F6QFS1;E9PVH6;F6UL00	Zinc finger protein 106	Zfp106;Znf106
-0.175198	0.47922		E9Q852;E9Q9C3;Q9QZQ1-2;Q9QZQ1;E9PYX7;F7C3I9;D3Z7L2;D3YUD2	Afadin	Mllt4
-0.38831	2.44329	+	E9Q8F0;Q8VH51-2;Q8VH51;B7ZD61;Q8VH51-3;F7AA45;B7ZD63;B7ZD64;E9PZF9;D6RCZ8;E9Q999;D6RJ85	RNA-binding protein 39	Rbm39
-0.0739925	0.23687		E9Q8N1;E9Q8K5;A2ASS6;A2ASS6-2;F7CR78	Titin	Ttn
0.556503	0.990949		E9Q8N5;Q08EB6;Q8BRT1;F7DCH5;Q8BRT1-6;Q8BRT1-5	CLIP-associating protein 2	Clasp2
-0.304585	1.68816	+	E9Q8Z8;P30999;D3Z2H2;E9Q904;G3X9V2;E9Q8Z6;D3Z7H6;E9Q905;E9Q8Z4;E9Q8Z9;E9Q901;E9Q986;E9Q907;D3Z2H7	Catenin delta-1	Ctnnd1
0.992422	0.736788		E9Q9I2;E9Q9R9;F6YZU5		Dlg5
0.0508725	0.0740475		E9Q9M5;A0A0A6YWX1;J3KMM1;Q3UJD6-2;Q3UJD6;A0A0A6YWN9;A0A0A6YXT9	Ubiquitin carboxyl-terminal hydrolase;Ubiquitin carboxyl-terminal hydrolase 19	Usp19
0.120707	0.316442		E9Q9X1;S4R1P5;Q91ZU6;Q91ZU6-3;Q91ZU6-4;A0A087WSP0;Q91ZU6-2;S4R1Y6;A0A087WPR7;A0A087WRB8;Q91ZU6-5	Dystonin	Dst
0.50304	1.37813	+	E9Q9Y4;Q3URK3;G3UXI7;G3UZ35	Methylcytosine dioxygenase TET1	Tet1
-0.130535	0.449746		E9QA25;E9Q2Z1;F6VR46		Cecr2
1.12515	4.35642	+	E9QA63;B1ARU4;E9PVY8;Q9QXZ0;A0A0A0MQA6;E9QNP1;Q9QXZ0-3;Q9QXZ0-2;Q9QXZ0-4;F6Q750;F6XCT0;F6SHS0;S4R2C6;S4R2A8;F6RL59;F6RCJ3;F6YKN8	Microtubule-actin cross-linking factor 1	Macf1
-0.137685	0.501879		E9QAD3;Q02395-2;Q02395;F6Q1Z6;M0QWI3;E9Q5U4;E9Q8G7	Metal-response element-binding transcription factor 2	Mtf2
1.77158	1.9221	+	E9QAE3		Btaf1
-0.804057	3.10444	+	E9QAE4;O88491;D3YUP2;Q6P2L6-3	Histone-lysine N-methyltransferase, H3 lysine-36 and H4 lysine-20 specific	Nsd1
0.328435	1.25096		E9QAI5;B2RQC6;G3UWN2;B2RQC6-2;E9QAT6;F6S3Z3	CAD protein;Glutamine-dependent carbamoyl-phosphate synthase;Aspartate carbamoyltransferase;Dihydroorotase	Cad
-0.744618	3.51268	+	E9QAQ7;A2BH40;A2BH40-4;A2BH40-2;A2BH40-3	AT-rich interactive domain-containing protein 1A	Arid1a
-0.320975	0.321857		E9QAR6;E9Q1A5;D3YX49;E9QAR4;E9QAR1;B1ASA5;E9QA68;D3Z517		Zfp384
-0.460477	2.58064	+	E9QAS4;E9QAS5;Q6PDQ2;F6WR45;E9PYU4;E9PYL1;A2A8L1;F7C528;E9Q614;B1AR17;F6V4V3	Chromodomain-helicase-DNA-binding protein 4	Chd4
0.27759	0.653126		E9QAT0;D3Z6U8;E9QNF5;Q6AXB7;P35922-9;P35922-8;P35922-3;P35922-7;P35922-2;P35922;E9QAS9;E9QAS8;P35922-11;P35922-10;P35922-5;P35922-4;P35922-12;P35922-6	Fragile X mental retardation protein 1 homolog	Fmr1
-0.125622	0.771814		E9QAU4;A2AQ25;D3Z781;A2AQ25-4;A2AQ25-3;A2AQ25-2;A2AQ25-8;A2AQ25-9;A2AQ25-6;A2AQ25-5;Q8BHR1;A2AQ25-7;B1AY50;B1AY49	Sickle tail protein	Etl4;Skt
0.47619	1.68701	+	E9QAZ2;Q9CZM2;B8JKK2	Ribosomal protein L15;60S ribosomal protein L15	Gm10020;Rpl15
0.157078	0.922287		E9QK83;Q5XG71	Small subunit processome component 20 homolog	Utp20
0.362045	2.26207	+	E9QK89;Q5PSV9;G3UX64	Mediator of DNA damage checkpoint protein 1	Mdc1
0.861627	1.95568	+	E9QKA2;G5E8P8;Q61539;D3YW03;O08580;P62509-2;P62509	Steroid hormone receptor ERR2	Esrrb
-1.18025	3.73023	+	E9QKA4;A2A8V8;A2A8V9;E9PUK6;Q52KI8;Q52KI8-2;F6UK16;F7BWM1;A2A983;F6T4M4	Serine/arginine repetitive matrix protein 1	Srrm1	+	+	+
-0.223933	1.06475		E9QKD1;Q3UHX0;Q3UHX0-2	Nucleolar protein 8	Nol8
-1.68573	5.0265	+	E9QKQ3;Q9Z2Q2;F6ZLH4;H7BX94;K4DI66;Q9Z2Q2-3;Q9Z2Q2-2;D3Z5V3	Lysine-rich nucleolar protein 1	Knop1
1.20694	1.67015	+	E9QKZ2;Q91YE6;F6TLX3;E0CY46;E0CXB2	Importin-9	Ipo9
0.446105	1.41283	+	E9QL04;O88445	Aurora kinase C	Aurkc
-0.455933	0.844482		E9QL43;Q8CIC2;Q8CIC2-2	Nucleoporin-like protein 2	Nupl2
0.29375	0.804092		E9QLG3;A2AWL7;H7BX50;A2AWL7-3;A2AWL7-2;A2AWL7-4	MAX gene-associated protein	Mga
0.540835	1.56299	+	E9QME3;Q8K305	Kinetochore-associated protein NSL1 homolog	Nsl1
-1.68186	5.14873	+	E9QML5;Q61464-4;Q61464;E9QKZ7;Q61464-7;Q61464-2;Q61464-5;Q61464-3	Zinc finger protein 638	Zfml;Znf638			+
-1.19618	1.13578		E9QMY5;Q9QXN0-4;Q9QXN0-3;E9Q6I3;Q9QXN0-2;Q9QXN0	Protein Shroom3	Shroom3
0.863298	2.89477	+	E9QN08;Q80T06;P57776;P57776-3;D3YUQ9	Elongation factor 1-delta	Eef1d
-0.24137	1.47312	+	E9QN31;Q922K7	Probable 28S rRNA (cytosine-C(5))-methyltransferase	Nop2
0.331147	0.736788		E9QN52;A0A0G2JEP4;A0A0G2JFV5;Q91WK0-2;Q91WK0;A0A0G2JGZ1;A0A0G2JDR6	Leucine-rich repeat flightless-interacting protein 2	Lrrfip2
0.28593	1.2932		E9QNH6;E9Q580;Q7TQD7;P46735-2;P46735;D3YV80	Unconventional myosin-Ib	Myo1b
-0.41256	2.49117	+	E9QNN1;O70133-2;O70133-3;Q3UR42;A0A087WRT3	ATP-dependent RNA helicase A	Dhx9
-0.397367	1.51761	+	E9QP00;Q6PFR5	Transformer-2 protein homolog alpha	Tra2a
1.66953	2.47222	+	E9QPB3;P59328-2;P59328-3;P59328	WD repeat and HMG-box DNA-binding protein 1	Wdhd1
-0.305195	0.339805		F2Z4B3;O35207;G3UYI1;Q9CPY4	Cyclin-dependent kinase 2-associated protein 1	Cdk2ap1
0.988975	2.10004	+	F6QL70;D3Z1N9;P47915;W4VSN7;F6YH22	60S ribosomal protein L29	Gm17669;Gm10709;Rpl29;Gm3550
-1.20112	2.61283	+	F6RGI3		Gm340
-0.594958	1.97076	+	F6TFN2;E9PYI7;Q3UPW3;E0CZD8		Lmo7
0.104947	0.196091		F6YRW4;P59997;H3BLD4;A0A087WP68;P59997-2;H3BL82;P59997-3	Lysine-specific demethylase 2A	Kdm2a
0.0780575	0.183796		F6YVP7;P62270;S4R1N6	40S ribosomal protein S18	Gm10260;Rps18
0.461375	0.644327		F6YY69;F6VW30;P68254-2;P68254	14-3-3 protein theta	Ywhaq
-0.974765	3.26914	+	F6ZBR8;O88286-3;G5E8J8;O88286-2;O88286	Protein Wiz	Wiz
3.78704	4.60513	+	F6ZE40;D6RG57;D3YW66;Q8R1S0	Ubiquinone biosynthesis monooxygenase COQ6	Coq6
-0.94987	2.30174	+	F7BJB9		Morc3
0.635175	0.566371		F7BWP1;Q8WTY4	Anamorsin	Ciapin1
0.757123	2.69032	+	F7C386;E9PX91;F6TVX7;Q8BSF4;D3YY63;D3Z0X7;A0A0G2JEL6	Phosphatidylserine decarboxylase proenzyme;Phosphatidylserine decarboxylase alpha chain;Phosphatidylserine decarboxylase beta chain	Pisd;Gm20671
0.147973	0.262733		F7CRG8;F7A3Q3;F6UY70;F6ZEX4;F7CVZ7;E9Q9N6;E9PYX3;Q3T9A3;F6ZS70;E9QMP6;Q05512-3;Q05512-4;Q05512-2;Q05512	Serine/threonine-protein kinase MARK2	Mark2
0.5814	1.45815	+	F7CVW0;B2RRI2;Q689Z5;Q689Z5-2;Q3TMM7;A0A0G2JGC7;A0A0G2JEM3;Q7TNB8-2;Q7TNB8;Q7TNB8-3	Protein strawberry notch homolog 1	Sbno1
0.695575	0.968272		F8VPK3;P56671	Myc-associated zinc finger protein	Maz
-0.228552	1.13098		F8VPM0;E9Q374;Q91YE5;Q91YE5-3;Q91YE5-2	Bromodomain adjacent to zinc finger domain protein 2A	Baz2a
0.39217	2.30412	+	F8VPV0;P48725;P48725-3;P48725-2	Pericentrin	Pcnt
0.427797	1.65552	+	F8VPX1;Q6A4J8-3;Q6A4J8;E9PXY8;Q6A4J8-2;G3UWR8;E0CY04	Ubiquitin carboxyl-terminal hydrolase;Ubiquitin carboxyl-terminal hydrolase 7	Usp7
0.309368	0.923908		F8VQ40;P19137	Laminin subunit alpha-1	Lama1
-0.106135	0.430399		F8VQ93;Q8VDD9;A0A087WPP7;A0A087WR26	PH-interacting protein	Phip
0.436947	2.42222	+	F8VQJ3;P02468	Laminin subunit gamma-1	Lamc1
-0.5015	1.09409		F8WGQ1;Q9Z248-4;Q9Z248-3;Q9Z248-5;Q9Z248-2;Q9Z248;F6V059;F7C1H2;F6V953;E0CYG6	Zinc finger protein AEBP2	Aebp2
-0.11767	0.301039		F8WGW3;Q497V5-2;Q497V5	S1 RNA-binding domain-containing protein 1	Srbd1
0.576143	1.51349	+	F8WHL2;Q8CIE6	Coatomer subunit alpha;Coatomer subunit alpha;Xenin;Proxenin	Copa
-0.129062	0.577614		F8WHU5;Q4VA53;Q4VA53-3;Q4VA53-2	Sister chromatid cohesion protein PDS5 homolog B	Pds5b
0.0822825	0.388587		F8WHU7;Q9D3E6;F6XQW1;F6TNY1;D6RHQ7;D6REF2;Q8C918;D3YYD4;D3Z1T1;D6RH50;O70576	Cohesin subunit SA-1	Stag1
0.17301	0.591751		F8WHU8;Q9D8T7;F7DE82;Q9D8T7-2	SRA stem-loop-interacting RNA-binding protein, mitochondrial	Slirp
-0.02348	0.0786805		F8WHY8;E9PX23;Q8K4B0	Metastasis-associated protein MTA1	Mta1
-0.0150975	0.031678		F8WI26;E9QJT6;Q68ED3;F6UPY1;A0A0G2JDV2;Q6PB75	Non-canonical poly(A) RNA polymerase PAPD5	Papd5
-0.535837	1.21925		F8WI31;D3Z4V1;Q922V4	Pleiotropic regulator 1	Plrg1	+	+	+
2.94671	4.42989	+	F8WI95;Q9CQT1;F6YY88	Methylthioribose-1-phosphate isomerase	Mri1
0.662787	3.21673	+	F8WIX8;Q6GSS7;Q64523	Histone H2A;Histone H2A type 2-A;Histone H2A type 2-C	Hist1h2al;Hist2h2aa1;Hist2h2ac
-0.41291	1.97392	+	F8WJ40;O08550;F6W623	Histone-lysine N-methyltransferase 2B	Kmt2b
-0.394147	1.02769		F8WJ41;P62245;D3Z712;D3YVB4	40S ribosomal protein S15a	Rps15a
-0.10235	0.395146		F8WJA0;Q9ESV0	ATP-dependent RNA helicase DDX24	Ddx24
-0.340555	1.26208		F8WJG3;P62996	Transformer-2 protein homolog beta	Tra2b
-0.5756	1.52356	+	F8WJL9;A2AQH4;F6ZBD9	BCL-6 corepressor-like protein 1	Bcorl1
1.15512	2.64289	+	G3UVU1;Q6PCN7;E9PVX5	Helicase-like transcription factor	Hltf
-0.225295	1.41686	+	G3UVU2;Q62203;D3YW09;D3Z5A6	Splicing factor 3A subunit 2	Sf3a2	+	+
0.11341	0.132758		G3UWR2;G3UYG6;Q6Y7W8;Q6Y7W8-2;G3UZX7;E9Q2M5;G3UYR9	PERQ amino acid-rich with GYF domain-containing protein 2	Gigyf2
0.010145	0.0327646		G3UWZ0;O88379	Bromodomain adjacent to zinc finger domain protein 1A	Baz1a
-0.253337	0.666873		G3UX50;Q3UKR0;O35613	Death domain-associated protein 6	Daxx
-2.22339	4.96857	+	G3UXT6;G3UZK5;Q60960;G3UWJ8	Importin subunit alpha-5;Importin subunit alpha-5, N-terminally processed	Kpna1
-0.07389	0.234986		G3UXT7;Q8CFQ9;P56959;G3UZD2;Q91VQ2	RNA-binding protein FUS	Fus
0.373163	2.02672	+	G3UY19;G3UW86;G3UWQ7;Q99K43;G3XA79;G3UXT4;G3UYX6;G3UXB1	Protein regulator of cytokinesis 1	Prc1
-0.51443	0.918452		G3UY42;Q8CCS6-2;Q8CCS6;G3UX74	Polyadenylate-binding protein 2	Pabpn1
0.392632	2.60697	+	G3UYN0;Q587J6;E9PZU6;E9PXD6	LINE-1 type transposase domain-containing protein 1	L1td1
0.421432	0.998951		G3UYV7;P62858;J3QNN8	40S ribosomal protein S28	Rps28
-0.395352	2.41319	+	G3UZ34;A2AH85;O08810;G3UXK8;G3UZ25	116 kDa U5 small nuclear ribonucleoprotein component	Eftud2	+	+	+
0.662155	2.99112	+	G3UZD0;G3X8Z6;Q5U4B1;G3UWX1;P35601-2;P35601	Replication factor C subunit 1	Rfc1
1.09388	2.26832	+	G3UZZ3;Q3T9X3;Q3TCR7;G3X9G4;F8WIV5;P39054-2;P39054;E9QLL2;Q8BZ98-2;Q8BZ98;P39053-5;P39053-3;P39053-6;P39053-4;P39053;G3UXX2;F2Z460;E0CXZ8	Dynamin-2;Dynamin-3	Dnm2;Dnm3
-0.775915	2.73078	+	G3X8T2;Q0P678;H3BIW0;H3BJN4;H3BJJ9;REV__H3BJN4;REV__Q0P678;REV__H3BIW0;REV__G3X8T2	Zinc finger CCCH domain-containing protein 18	Zc3h18
1.01402	0.529237		G3X8Y3;A0A0A6YW80;Q80UM3;A0A0A6YX86;E9PZ53;Q9DBB4	N-alpha-acetyltransferase 15, NatA auxiliary subunit	Naa15
0.442263	1.80077	+	G3X922;D4AFX7;A0A087WSI0;A0A087WRC9;A0A087WS25		Dnajc13
-0.07532	0.25294		G3X926;Q9JJ80;S4R1Y5;S4R2H5;S4R2R2	Ribosome production factor 2 homolog	Rpf2
-0.82229	2.48681	+	G3X934;Q3TWF6	WD repeat-containing protein 70	Wdr70
-0.604445	2.66612	+	G3X956;Q920B9	FACT complex subunit SPT16	Supt16;Supt16h
0.650092	3.4087	+	G3X963;Q8CDM1;Q8CDM1-2	ATPase family AAA domain-containing protein 2	Atad2
0.42096	2.74529	+	G3X9B1		Heatr1
-0.6584	1.12017		G3X9J0;S4R2N4;S4R1S0;S4R1U8		Sipa1l3
0.212422	0.627078		G3X9L6;Q9DCX2;B1ASE2	ATP synthase subunit d, mitochondrial	Gm10250;Atp5h
1.04367	3.37643	+	G3X9Q6;Q8BWW4;E9Q066	La-related protein 4	Larp4
-0.593487	2.9682	+	G3XA10;Q8VEK3	Heterogeneous nuclear ribonucleoprotein U	Hnrnpu	+	+
-1.51483	1.53659	+	G3XA30;E0CY57		Nsmce4a
0.10317	0.295046		G5E846;P15331;G3X981;P15331-3;P15331-2	Peripherin	Prph
-0.892785	4.42842	+	G5E866;Q99NB9;A0A087WNS2	Splicing factor 3B subunit 1	Sf3b1	+	+
-0.6238	3.64183	+	G5E870;A0A0B4J1N9;A0A087WRV6;Q3TP48;A0A087WSG4;A0A087WS65;A0A087WS33	E3 ubiquitin-protein ligase TRIP12	Trip12
0.3163	1.4048	+	G5E896;Q3UJB9;Q3UJB9-2;D6RE33;F6ZJ27	Enhancer of mRNA-decapping protein 4	Edc4
-0.73434	3.1013	+	G5E8I8;Q8CGZ0	Calcium homeostasis endoplasmic reticulum protein	Cherp
0.0118675	0.0343775		G5E8N7;Q9JLV6-2;Q9JLV6;E9Q9A5	Bifunctional polynucleotide phosphatase/kinase;Polynucleotide 3-phosphatase;Polynucleotide 5-hydroxyl-kinase	Pnkp
0.877905	2.2925	+	G5E8P4;G3UWY3;Q5NBX1-2;Q5NBX1-3;Q5NBX1	Protein cordon-bleu	Cobl
1.52859	1.43056	+	G5E8R8;Q6P5G6	UBX domain-containing protein 7	Ubxn7
0.869823	1.57446	+	G5E8W8;A2BI37;Q62394;B1AXE7	Zinc finger protein 185	Zfp185;Znf185
1.47515	3.89096	+	G5E902;Q8VEM8	Phosphate carrier protein, mitochondrial	Slc25a3
-0.596513	2.46401	+	G5E924;Q8R081;G3UY38;G3UY56;G3UYY3	Heterogeneous nuclear ribonucleoprotein L	Hnrnpl
-0.243287	0.880098		G8JL40;A3KG93;Q6ZQ88;F6Z4I3;F6ZC60	Lysine-specific histone demethylase 1A	Kdm1a
-0.218495	0.677031		G8JL51;Q8K202-3;Q8K202-2;Q8K202	DNA-directed RNA polymerase I subunit RPA49	Polr1e
-0.694423	3.15376	+	G8JL74;G3UXA6;Q8BHD7-2;Q8BHD7;G3UZ01;G3UY95;G3UXZ6;G3UXZ8	Polypyrimidine tract-binding protein 3	Ptbp3
0.657875	2.81819	+	H3BKM0;H3BIY9;Q9DBG3;Q9DBG3-2;Q5SWR0;H3BJ06;Q5SVG5;Q5SVG4;O35643	AP-2 complex subunit beta	Ap2b1
-0.518537	1.2791		H3BKM2;Q80YV2;Q80YV2-2;D3Z3D0;D3Z0B2;D3Z5A4	Nuclear-interacting partner of ALK	Zc3hc1
0.797705	3.9286	+	H3BKN0;Q1HFZ0	tRNA (cytosine(34)-C(5))-methyltransferase	Nsun2
-1.7285	4.74102	+	H3BL37;O08784;H3BIX0;Q05CS0;H3BK88	Treacle protein	Tcof1
-0.0396725	0.168386		H7BX95;Q6PDM2;Q6PDM2-3;Q6PDM2-2;F7AI47;F6QXN3	Serine/arginine-rich splicing factor 1	Srsf1	+	+	+
-0.442045	1.71119	+	H7BXB1;E9Q4G7;E9PWB2;Q8BK63-2;Q8BK63;E9Q2U6;E9Q3W1;F6YBC9	Casein kinase I isoform alpha	Csnk1a1			+
-0.350382	2.13845	+	H9KV00;Q9QX47-3;Q9QX47;H9KV01;H9KV15;Q9QX47-4;Q9QX47-2;H9KV02;F7CU80	Protein SON	Son			+
-1.05254	1.83765	+	J3JS23;Q8C827-2;Q8C827-3;Q8C827;Q571J5;O88253;A0A087WQI7;E9PUT0;F6UQD0;Q9CZ29;Q7TMC9;A0A087WPV0;Q7M6W8;B8JJY3;Q8K3B4;F2Z422;F8VPP0;Q9Z117;Q6DFU8;E9PVW1;G3UVW7;Q80ZX2;B1B1D3;Q07231	Zinc finger protein 62;Zinc finger protein 354C	Zfp62;Znf354c
1.99015	4.3	+	J3JS94;Q9CR70	EKC/KEOPS complex subunit Lage3	Lage3
0.95349	2.15474	+	J3KMM5;O55143-2;O55143;Q8R429	Calcium-transporting ATPase;Sarcoplasmic/endoplasmic reticulum calcium ATPase 2	Atp2a2
-0.291268	1.46267	+	J3QK00;O70517;J3QMN9;Q3UPR8		Gm21761;Gm20767;D13Ertd608e
-0.176358	0.0610889		J3QK52;Q8BHX6		Noc2l
0.548872	2.56185	+	J3QMC5;A2ANY6	Midasin	Mdn1
-0.831762	1.17963		J3QNK5;Q8BIH0-2;Q8BIH0	Histone deacetylase complex subunit SAP130	Sap130
0.401665	1.83052	+	K3W4L0;B2RRE2;E9QAX2;Q9JMH9-4;Q9JMH9-1;Q9JMH9;Q9JMH9-6;E9QA74;E9Q405;Q9JMH9-5;Q9JMH9-7;Q9JMH9-2	Unconventional myosin-XVIIIa	Myo18a
-0.291073	0.711935		K3W4P2;Q6P4S8;A0A0G2JFR3;A0A0G2JDG8	Integrator complex subunit 1	Ints1
1.10062	3.12825	+	L7N1Z0;L7N248		Gm6871
-0.617663	1.02777		L7N236;A2AJU2;E9Q1L3;B1AZM2;B1AVZ5;L7N278;B1AV09		Gm15127;Gm10439;Gm15091;Luzp4
-0.186545	0.371035		M0QWR4;J3QP73;M0QWS9;E9Q4G9;L7N2C4;E9PZY4;E9PX25;L7N2D7;J3QP31		Gm21312;Gm20765;Gm4340;Gm6763;Gm4305;Gm4302
-0.517915	1.82596	+	M0QWX4;P59110;M0QWV7	Sentrin-specific protease 1	Senp1
0.76187	1.08966		O08582	GTP-binding protein 1	Gtpbp1
-0.164015	0.465379		O08583;Q9JJW6-2;G3X9I4;O08583-2;Q9JJW6	THO complex subunit 4;Aly/REF export factor 2	Alyref;Alyref2		+	+
-0.483592	1.21925		O08664	B-cell CLL/lymphoma 7 protein family member C	Bcl7c
-1.50401	2.16431	+	O08856	RNA polymerase II elongation factor ELL	Ell			+
0.78733	3.4087	+	O35129;F6QPR1;F6Q8V7	Prohibitin-2	Phb2
-0.006	0.0150597		O35130	Ribosomal RNA small subunit methyltransferase NEP1	Emg1
0.241852	0.83417		O35134	DNA-directed RNA polymerase I subunit RPA1	Polr1a
-0.393823	0.693439		O35218	Cleavage and polyadenylation specificity factor subunit 2	Cpsf2
-0.59464	2.96691	+	O35286;Q497W9;A0A0G2JG10;A0A0G2JGQ5;Q05BH3;G3X8X0	Putative pre-mRNA-splicing factor ATP-dependent RNA helicase DHX15	Dhx15		+
3.09957	4.74102	+	O35465;O35465-2;F6WP10;D3Z597	Peptidyl-prolyl cis-trans isomerase FKBP8	Fkbp8
1.7611	1.54805	+	O35685	Nuclear migration protein nudC	Nudc
1.20183	2.01405	+	O35841	Apoptosis inhibitor 5	Api5		+
-0.488683	0.958344		O35980	Endonuclease III-like protein 1	Nthl1
-0.49122	2.04298	+	O54825	Bystin	Bysl
-0.0989225	0.182049		O54833	Casein kinase II subunit alpha	Csnk2a2
0.102572	0.244866		O54941	SWI/SNF-related matrix-associated actin-dependent regulator of chromatin subfamily E member 1	Smarce1
1.00175	3.58266	+	O54946;F6YRQ2;A0A0G2JGN9;A0A0G2JEI3;A0A0G2JER9;G3X8S5;O54946-2;Q9QYI8	DnaJ homolog subfamily B member 6	Dnajb6
2.24789	5.0265	+	O54962	Barrier-to-autointegration factor;Barrier-to-autointegration factor, N-terminally processed	Banf1
1.53251	2.51304	+	O54984	ATPase Asna1	Asna1
1.40992	2.23924	+	O55028;D3Z7R0	[3-methyl-2-oxobutanoate dehydrogenase [lipoamide]] kinase, mitochondrial	Bckdk
0.09949	0.0797564		O55029	Coatomer subunit beta	Copb2
1.20912	1.60117	+	O55091	Protein IMPACT	Impact
-0.237245	1.33852	+	O55111	Desmoglein-2	Dsg2
0.0516025	0.0224642		O55125;Q5SVG6	Protein NipSnap homolog 1	Nipsnap1
-0.368312	1.47553	+	O55135;A6PWZ2	Eukaryotic translation initiation factor 6	Eif6
-0.393625	1.4342	+	O55142	60S ribosomal protein L35a	Rpl35a
0.510563	2.40473	+	O55201;O55201-2	Transcription elongation factor SPT5	Supt5h
0.08492	0.182049		O70126	Aurora kinase B	Aurkb
1.42619	3.44543	+	O70194	Eukaryotic translation initiation factor 3 subunit D	Eif3d
0.827793	2.16818	+	O70201-2;O70201;O70201-3	Baculoviral IAP repeat-containing protein 5	Birc5
0.9175	1.81232	+	O70318	Band 4.1-like protein 2	Epb41l2
1.12939	0.626116		O70503;O70503-2	Estradiol 17-beta-dehydrogenase 12	Hsd17b12
1.07725	2.46009	+	O70551;F8WGJ7;Q9Z0G2	SRSF protein kinase 1	Srpk1
-2.00301	4.50747	+	O88291;D3YXQ7;O88291-2	DBIRD complex subunit ZNF326	Znf326;Zfp326		+
1.02893	3.33682	+	O88322	Nidogen-2	Nid2
1.09512	3.88847	+	O88477	Insulin-like growth factor 2 mRNA-binding protein 1	Igf2bp1
-0.0379525	0.109735		O88508;O88508-2;G3UXY2;G3UZK0;G3UZN5;G3UZF8;G3UZG8;G3UX07;G3UZH2;G3UY43	DNA (cytosine-5)-methyltransferase 3A	Dnmt3a
-0.687013	3.22098	+	O88532;F6V459;F6QJP7;F6RTK9;D3Z5G4	Zinc finger RNA-binding protein	Zfr
0.817368	2.83939	+	O88554	Poly [ADP-ribose] polymerase 2	Parp2
-0.694555	2.65074	+	O88569;O88569-3;O88569-2	Heterogeneous nuclear ribonucleoproteins A2/B1	Hnrnpa2b1	+	+
-0.464238	0.51077		O88796	Ribonuclease P protein subunit p30	Rpp30
0.405942	1.83871	+	O88967	ATP-dependent zinc metalloprotease YME1L1	Yme1l1
2.0757	4.74102	+	O89086;Q8BG13;S4R2M6	Putative RNA-binding protein 3	Rbm3
0.612205	2.30229	+	P05064;D3Z510;D3YWI1;A6ZI44;D3YV98;Q9CPQ9;A6ZI46;A6ZI47	Fructose-bisphosphate aldolase A	Aldoa;Aldoart1
0.236643	0.267429		P07607;A0A0G2JF31;A0A0G2JGG2;D6RCW9;A0A0G2JF03	Thymidylate synthase	Tyms
0.647787	3.50961	+	P07901;B7ZC50;A2A6A2;B7ZC49	Heat shock protein HSP 90-alpha	Hsp90aa1
0.751445	0.991306		P08003	Protein disulfide-isomerase A4	Pdia4
0.651045	3.30847	+	P08113;F7C312	Endoplasmin	Hsp90b1
1.53194	4.31128	+	P08249;A0A0G2JGY4;A0A0G2JF23	Malate dehydrogenase, mitochondrial	Mdh2
0.453908	2.54037	+	P08775	DNA-directed RNA polymerase II subunit RPB1	Polr2a
0.526818	3.00453	+	P09103;E9Q8G8	Protein disulfide-isomerase	P4hb
0.281772	1.67676	+	P09405;A0A087WRM5	Nucleolin	Ncl
0.961897	2.85747	+	P09411;S4R2M7;P09041	Phosphoglycerate kinase 1;Phosphoglycerate kinase	Pgk1
0.478585	2.8412	+	P09803;P10287	Cadherin-1;E-Cad/CTF1;E-Cad/CTF2;E-Cad/CTF3	Cdh1
0.49925	2.83693	+	P10126;D3Z3I8;D3YZ68	Elongation factor 1-alpha 1	Eef1a1
0.430573	2.36256	+	P10853;Q8CGP2;Q64475;Q8CGP2-2;Q8CBB6	Histone H2B type 1-F/J/L;Histone H2B type 1-P;Histone H2B type 1-B;Histone H2B	Hist1h2bf;Hist1h2bp;Hist1h2bb;Hist1h2br
-0.100995	0.140413		P10922	Histone H1.0;Histone H1.0, N-terminally processed	H1f0
0.263767	0.168386		P11031	Activated RNA polymerase II transcriptional coactivator p15	Sub1
0.503123	2.3472	+	P11260;E9Q9P2	LINE-1 retrotransposable element ORF1 protein
0.878992	4.13855	+	P11440;D3Z2T9	Cyclin-dependent kinase 1	Cdk1
1.32614	4.82511	+	P11499;E9Q3D6;E9PX27;E9Q0C3;D3Z1R1;REV__Q8BL66	Heat shock protein HSP 90-beta	Hsp90ab1
-1.25598	4.33406	+	P11679;CON__P05787;CON__Q9H552;CON__H-INV:HIT000292931;E9Q1Z0;CON__Q9NSB2;CON__Q6ISB0;Q99M73;CON__P07744;P07744;CON__Q14CN4-1;CON__Q6IME9;CON__Q3SY84;CON__Q7RTS7;CON__Q32MB2;Q6IME9;CON__REFSEQ:XP_092267;E9Q1Y9;CON__Q61726;CON__O43790;CON__Q6NT21;CON__P78385;CON__Q14533;CON__P78386;CON__Q8N1N4-2;CON__Q7RTT2;Q6IFZ8;CON__P19013;P03995-2;P03995;Q9ERE2;P97861;Q6IMF0;Q9Z2T6	Keratin, type II cytoskeletal 8	Krt8
1.67052	4.74102	+	P11983;P11983-2;F2Z483	T-complex protein 1 subunit alpha	Tcp1
1.77076	3.42425	+	P12382	ATP-dependent 6-phosphofructokinase, liver type	Pfkl
-0.071445	0.193977		P12970;F6VBB8;V9GX35;F6SSI5	60S ribosomal protein L7a	Rpl7a
-0.41228	2.42222	+	P13020-2;P13020	Gelsolin	Gsn
1.58969	4.74102	+	P13439;D6RJ62	Uridine 5-monophosphate synthase;Orotate phosphoribosyltransferase;Orotidine 5-phosphate decarboxylase	Umps
-0.239005	0.881736		P13864;J3QNW0;P13864-2	DNA (cytosine-5)-methyltransferase 1;Cytosine-specific methyltransferase	Dnmt1
1.23994	3.45115	+	P14115	60S ribosomal protein L27a	Rpl27a
-0.22667	0.950359		P14131	40S ribosomal protein S16	Rps16
-0.10612	0.343216		P14148;F6XI62	60S ribosomal protein L7	Rpl7
1.0557	4.50747	+	P14206	40S ribosomal protein SA	Rpsa
-0.066085	0.229256		P14211	Calreticulin	Calr
0.93742	2.73774	+	P14602-2;P14602;P14602-3;D3YZ06	Heat shock protein beta-1	Hspb1
0.643057	0.505201		P14685;F7B7L8	26S proteasome non-ATPase regulatory subunit 3	Psmd3
0.272877	1.22988		P14733	Lamin-B1	Lmnb1
0.326605	1.99845	+	P15864	Histone H1.2	Hist1h1c
-0.260317	0.553494		P16254;A2AUM6	Signal recognition particle 14 kDa protein;Signal recognition particle 14 kDa protein, N-terminally processed	Srp14
0.85705	3.30796	+	P16460;J3QNG0	Argininosuccinate synthase	Ass1;Gm5424
0.639273	3.53707	+	P16546-2;P16546;A3KGU5;A3KGU7;E9Q447;A3KGU9;A3KGU4	Spectrin alpha chain, non-erythrocytic 1	Sptan1
1.01005	3.4087	+	P17095	High mobility group protein HMG-I/HMG-Y	Hmga1
0.593148	1.80766	+	P17095-1	High mobility group protein HMG-I/HMG-Y	Hmga1
0.772385	3.71685	+	P17182;B1ARR7;B0QZL1;Q6PHC1;B1ARR6;D3YVD3;D3Z2S4;D3Z6E4;P17183;Q5SX61;Q5SX60;Q5SX59;P21550	Alpha-enolase	Eno1
0.93814	3.53707	+	P17742;V9GXC1;V9GX31;F8VPN3	Peptidyl-prolyl cis-trans isomerase A;Peptidyl-prolyl cis-trans isomerase A, N-terminally processed	Ppia
1.58296	1.83334	+	P17918	Proliferating cell nuclear antigen	Pcna
0.0240975	0.0153649		P18608;D3Z607	Non-histone chromosomal protein HMG-14	Hmgn1
0.223078	0.813924		P18760;F8WGL3;P45591	Cofilin-1	Cfl1
1.51666	4.90855	+	P19096	Fatty acid synthase;[Acyl-carrier-protein] S-acetyltransferase;[Acyl-carrier-protein] S-malonyltransferase;3-oxoacyl-[acyl-carrier-protein] synthase;3-oxoacyl-[acyl-carrier-protein] reductase;3-hydroxyacyl-[acyl-carrier-protein] dehydratase;Enoyl-[acyl-carrier-protein] reductase;Oleoyl-[acyl-carrier-protein] hydrolase	Fasn
0.393137	1.76139	+	P19253;E9Q5A0;S4R281	60S ribosomal protein L13a	Rpl13a
-0.356832	1.20976		P19324	Serpin H1	Serpinh1
0.062705	0.319626		P20029	78 kDa glucose-regulated protein	Hspa5
0.268892	1.62631	+	P20152;A0A0A6YWC8;A2AKJ2	Vimentin	Vim
0.91539	2.21813	+	P20263;E2JL30;G3UZG9	POU domain, class 5, transcription factor 1	Pou5f1
-0.188307	0.707468		P21107-2;D3Z2H9;D3Z6I8;E9Q7Q3;Q8K0Z5;E9Q5J9;P21107;D3YVR0	Tropomyosin alpha-3 chain	Tpm3;Tpm3-rs7
-0.120533	0.583509		P21619;P21619-2	Lamin-B2	Lmnb2
1.85859	5.0265	+	P23116	Eukaryotic translation initiation factor 3 subunit A	Eif3a
0.965243	3.71455	+	P23475;E9PZD4;E9Q0B8	X-ray repair cross-complementing protein 6	Xrcc6
-0.708965	3.1013	+	P23607;P17012;F8WGY3;E9PUP8;A2ANX9;P20662;P10925	Zinc finger autosomal protein;Zinc finger X-chromosomal protein;Zinc finger protein 711;Zinc finger Y-chromosomal protein 2;Zinc finger Y-chromosomal protein 1	Zfa;Zfx;Zfp711;Znf711;Zfy2;Zfy1
0.713623	2.5168	+	P23881;A2AW45	Transcription elongation factor A protein 3	Tcea3
0.530778	1.91994	+	P24369	Peptidyl-prolyl cis-trans isomerase B	Ppib
0.90815	2.67521	+	P24547;A0A0A6YXS4;A0A0A6YY72	Inosine-5-monophosphate dehydrogenase 2	Impdh2
-0.531208	0.334455		P24788;A2A9P6;P24788-2	Cyclin-dependent kinase 11B	Cdk11b
0.729568	2.9989	+	P25206	DNA replication licensing factor MCM3	Mcm3
0.139852	0.26228		P25444;D3YVC1;J3QMG5;D3YWJ3;F6YTZ4;D3Z536;E9Q1N8	40S ribosomal protein S2	Rps2;Gm5786;Gm6576;Gm8225;Gm18025
1.39584	4.27165	+	P26039;E9PUM4;A2AIM2;Q71LX4;F6S1V7;F6SX70	Talin-1	Tln1
0.16415	0.70245		P26231;E0CXB9;Q61301-2;Q61301-3;Q61301;REV__Q9JMB1-2;Q8BS72;REV__Q9JMB1	Catenin alpha-1	Ctnna1
0.21151	0.904208		P26369;Q3KQM4	Splicing factor U2AF 65 kDa subunit	U2af2		+	+
0.040915	0.11369		P26443	Glutamate dehydrogenase 1, mitochondrial	Glud1
0.35013	0.952685		P27048;P63163;A0A0G2JGN4	Small nuclear ribonucleoprotein-associated protein B;Small nuclear ribonucleoprotein-associated protein N	Snrpb;Snrpn	+	+
1.36589	3.95303	+	P27612;F7D1R5	Phospholipase A-2-activating protein	Plaa
2.76855	4.82572	+	P27641	X-ray repair cross-complementing protein 5	Xrcc5
0.209015	0.669473		P27659;A0A087WNS0;A0A087WQK0;Q9CQ09;E9PWZ3	60S ribosomal protein L3	Rpl3
0.367538	1.99986	+	P27773;F6Q404	Protein disulfide-isomerase A3	Pdia3
0.819213	3.4186	+	P28658	Ataxin-10	Atxn10
0.57082	3.05886	+	P29341;Q9D4E6;Q8C7D3;A2A5N3	Polyadenylate-binding protein 1	Pabpc1	+	+
1.65444	1.69129	+	P30416;D6RDE2;F6S2D5	Peptidyl-prolyl cis-trans isomerase FKBP4;Peptidyl-prolyl cis-trans isomerase FKBP4, N-terminally processed	Fkbp4
1.62402	4.50509	+	P30681	High mobility group protein B2	Hmgb2
-0.529133	1.21216		P31001	Desmin	Des
0.133302	0.396798		P31266;P31266-2;O08674	Recombining binding protein suppressor of hairless	Rbpj
2.04826	4.33406	+	P31938	Dual specificity mitogen-activated protein kinase kinase 1	Map2k1
-0.13544	0.546112		P32067;A2AR07;D6RI87;F6SXM5	Lupus La protein homolog	Ssb
-0.35073	1.89491	+	P32233;F7BQ65	Developmentally-regulated GTP-binding protein 1	Drg1
0.386338	0.766053		P33610	DNA primase large subunit	Prim2
0.47033	1.58627	+	P35486	Pyruvate dehydrogenase E1 component subunit alpha, somatic form, mitochondrial	Pdha1
-0.206205	1.01419		P35550	rRNA 2-O-methyltransferase fibrillarin	Fbl
0.48307	2.74129	+	P35564	Calnexin	Canx
0.197678	0.75179		P35700;B1AXW5;B1AXW6;B1AXW4;B1AZS9;O08807	Peroxiredoxin-1	Prdx1
0.098795	0.343216		P35979;F8VQK7	60S ribosomal protein L12	Rpl12
0.57331	2.4516	+	P35980;G3UZK4;G3UZJ6;G3UYV6;G3UX28	60S ribosomal protein L18	Rpl18
0.107915	0.674916		P38647	Stress-70 protein, mitochondrial	Hspa9
1.88617	2.37556	+	P40124;B1ARS0	Adenylyl cyclase-associated protein 1	Cap1
1.20449	4.35642	+	P40142;E0CY51	Transketolase	Tkt
0.291533	1.14489		P40201;G3V014;Q8C7Q2;G3UWS6	Chromodomain-helicase-DNA-binding protein 1	Chd1
0.692585	2.8414	+	P40630-2;P40630;D3Z0F3	Transcription factor A, mitochondrial	Tfam
0.197197	0.306909		P41105;F6Z0X0	60S ribosomal protein L28	Rpl28
1.54571	4.42989	+	P42932;H3BL49;H3BJB6;H3BLL1;H3BKG2;H3BKR8	T-complex protein 1 subunit theta	Cct8
0.575192	3.24154	+	P43247;G3UXD8;G3UWZ8	DNA mismatch repair protein Msh2	Msh2
0.273487	0.94248		P43274	Histone H1.4	Hist1h1e
0.281845	1.25096		P43275	Histone H1.1	Hist1h1a
0.079255	0.292978		P43276	Histone H1.5	Hist1h1b
6.31299	5.0265	+	P43277	Histone H1.3	Hist1h1d
1.3328	2.07553	+	P45952	Medium-chain specific acyl-CoA dehydrogenase, mitochondrial	Acadm
-0.812187	2.91099	+	P46061	Ran GTPase-activating protein 1	Rangap1
1.69628	1.29548		P46460;G3UX86	Vesicle-fusing ATPase	Nsf
0.929527	3.78646	+	P46467;Q8VEJ9;Q8BPY9	Vacuolar protein sorting-associated protein 4B	Vps4b
0.748263	3.4087	+	P46471;Q8BVQ9	26S protease regulatory subunit 7	Psmc2
0.398958	1.14498		P46660	Alpha-internexin	Ina
1.65851	4.33406	+	P46935;Q3V335;V9GWV8;V9GXK3	E3 ubiquitin-protein ligase NEDD4	Nedd4
-0.262568	0.617408		P47738;A0A0G2JEU1;A0A0G2JF60;D3YYF3;A0A0G2JFQ0	Aldehyde dehydrogenase, mitochondrial	Aldh2
0.791292	2.07639	+	P47754;Q5RKN9;P47753;D6RCW7;A0A0G2JE27	F-actin-capping protein subunit alpha-2;F-actin-capping protein subunit alpha-1	Capza2;Capza1
-0.257545	0.198697		P47811-3;P47811;B2KF34;B2KF35;P47811-2;P47811-4	Mitogen-activated protein kinase 14	Mapk14
-0.052005	0.168386		P47911;E9PUX4	60S ribosomal protein L6	Rpl6;Gm5428
0.418548	2.01405	+	P47962;D3YYV8	60S ribosomal protein L5	Rpl5
0.380717	1.69092	+	P47963	60S ribosomal protein L13	Rpl13
-0.590352	2.58064	+	P48678;P48678-2;P48678-3;D3YUF7	Prelamin-A/C;Lamin-A/C	Lmna
-0.01742	0.0188699		P48760-2;P48760-5;P48760-4;P48760;P48760-3;A2AK70	Folylpolyglutamate synthase, mitochondrial	Fpgs
0.73738	2.19207	+	P48962;Q3V132	ADP/ATP translocase 1	Slc25a4
-0.711943	2.58064	+	P49452	Centromere protein C	Cenpc
0.913532	3.40285	+	P49717;Q9CWV1-2;Q9CWV1	DNA replication licensing factor MCM4	Mcm4
1.00331	3.8282	+	P50516-2;P50516;D3YWH3;D3Z1B9	V-type proton ATPase catalytic subunit A	Atp6v1a
0.856475	3.51579	+	P50580;P50580-2;D3YVH7	Proliferation-associated protein 2G4	Pa2g4
0.71583	2.37965	+	P51410;A0A0G2JDK9;A0A0G2JES3;D3Z629;D3YZT0;A0A0G2JFQ3;S4R1R7	60S ribosomal protein L9	Rpl9
0.863892	2.48933	+	P51660	Peroxisomal multifunctional enzyme type 2;(3R)-hydroxyacyl-CoA dehydrogenase;Enoyl-CoA hydratase 2	Hsd17b4
1.19923	3.93411	+	P51881	ADP/ATP translocase 2;ADP/ATP translocase 2, N-terminally processed	Slc25a5
0.0426275	0.174655		P52293;A2A600;A2A601;A6PW68;F2Z431;A2A602	Importin subunit alpha-1	Kpna2
0.590322	1.43056	+	P52431;D6RFB8	DNA polymerase delta catalytic subunit;DNA polymerase	Pold1
0.52027	2.41319	+	P52432;G3UXX5;D3Z7Q8;G3UX92;D3Z3D6	DNA-directed RNA polymerases I and III subunit RPAC1	Polr1c
1.47435	4.77388	+	P52480-2;P52480	Pyruvate kinase PKM	Pkm
0.731892	3.24154	+	P53026;Q5XJF6;D6RE43	60S ribosomal protein L10a;Ribosomal protein	Rpl10a
-0.19418	1.19148		P53395;A0A0G2JGU0	Lipoamide acyltransferase component of branched-chain alpha-keto acid dehydrogenase complex, mitochondrial	Dbt
0.017015	0.0327646		P53569;P53569-2	CCAAT/enhancer-binding protein zeta	Cebpz
0.79885	2.94479	+	P54276	DNA mismatch repair protein Msh6	Msh6
1.74848	2.33692	+	P54731	FAS-associated factor 1	Faf1
0.45892	2.77967	+	P54775	26S protease regulatory subunit 6B	Psmc4
0.0492375	0.130012		P54823	Probable ATP-dependent RNA helicase DDX6	Ddx6
-2.68336	3.05629	+	P55200-2;P55200;D3Z5H5;S4R2S5	Histone-lysine N-methyltransferase 2A;MLL cleavage product N320;MLL cleavage product C180	Kmt2a
0.86939	3.46832	+	P56135;F8WHP8	ATP synthase subunit f, mitochondrial	Atp5j2
0.53834	2.40952	+	P56183-2;P56183-3;P56183	Ribosomal RNA processing protein 1 homolog A	Rrp1
0.23304	1.02768		P56480	ATP synthase subunit beta, mitochondrial	Atp5b
-0.76124	2.88912	+	P56960;Q8K366;F6VYQ6	Exosome component 10	Exosc10
0.531395	3.03093	+	P57780;E9Q2W9;D3Z0L8;D3Z761;D3YY95	Alpha-actinin-4	Actn4
-0.0225525	0.0973348		P57784;G5E883	U2 small nuclear ribonucleoprotein A	Snrpa1	+	+
1.23187	4.60587	+	P58252	Elongation factor 2	Eef2
-0.544403	0.91997		P58468	Protein FAM207A	Fam207a
-0.446362	2.17895	+	P58742	Aladin	Aaas
-0.0426725	0.085874		P59235	Nucleoporin Nup43	Nup43
-0.63335	2.79745	+	P59242;E9QMC1;P59242-2;D3YUW7;A0A0G2JEK8;A0A0G2JFG0	Cingulin	Cgn
0.576523	1.14321		P59325	Eukaryotic translation initiation factor 5	Eif5
-1.24377	3.2353	+	P59708	Splicing factor 3B subunit 6	Sf3b6		+
-0.315663	1.08865		P59999;E9PWA7	Actin-related protein 2/3 complex subunit 4	Arpc4
0.277898	1.61931	+	P60122;D3YW60;Q05CB6	RuvB-like 1	Ruvbl1
0.30897	0.813924		P60335	Poly(rC)-binding protein 1	Pcbp1
1.01998	4.01529	+	P60843	Eukaryotic initiation factor 4A-I	Eif4a1
0.200785	0.736996		P60867	40S ribosomal protein S20	Rps20
-0.01191	0.0224642		P60898;D3Z3Z8;D3YYI3;D3YYI2	DNA-directed RNA polymerase II subunit RPB9;DNA-directed RNA polymerase subunit	Polr2i
1.2043	2.39398	+	P61089	Ubiquitin-conjugating enzyme E2 N	Ube2n
-0.5215	2.06849	+	P61161	Actin-related protein 2	Actr2
3.56401	5.0265	+	P61219	DNA-directed RNA polymerases I, II, and III subunit RPABC2	Polr2f
0.771285	2.20994	+	P61222	ATP-binding cassette sub-family E member 1	Abce1
0.501982	2.13824	+	P61255;B1ARA3;B1ARA5	60S ribosomal protein L26	Rpl26
-0.24238	1.26426		P61327	Protein mago nashi homolog	Magoh	+	+	+
0.885235	3.24842	+	P61358;A2A4Q0	60S ribosomal protein L27	Rpl27
0.679638	0.866769		P61514	60S ribosomal protein L37a	Rpl37a
-0.139808	0.0863346		P61924	Coatomer subunit zeta-1	Copz1
0.439638	0.395336		P61965;F6Q3W0	WD repeat-containing protein 5	Wdr5
0.87731	2.50372	+	P61982	14-3-3 protein gamma;14-3-3 protein gamma, N-terminally processed	Ywhag
0.353272	1.93126	+	P62082;F6SVV1	40S ribosomal protein S7	Rps7;Gm9493
-0.69367	2.98812	+	P62137	Serine/threonine-protein phosphatase PP1-alpha catalytic subunit	Ppp1ca
0.130367	0.311141		P62141	Serine/threonine-protein phosphatase PP1-beta catalytic subunit	Ppp1cb
0.710225	2.57036	+	P62192	26S protease regulatory subunit 4	Psmc1
0.328143	1.07113		P62242	40S ribosomal protein S8	Rps8
1.15698	3.457	+	P62259;D6REF3;F6WA09	14-3-3 protein epsilon	Ywhae
0.261093	1.31703	+	P62264;D3YVF4;D3Z7I1	40S ribosomal protein S14	Rps14
0.123292	0.251067		P62267	40S ribosomal protein S23	Rps23
0.073415	0.0994529		P62274	40S ribosomal protein S29	Rps29
-0.610155	3.05193	+	P62281	40S ribosomal protein S11	Rps11
0.51329	2.43238	+	P62301	40S ribosomal protein S13	Rps13
-0.267242	0.673183		P62307	Small nuclear ribonucleoprotein F	Snrpf	+	+
-0.698832	0.963322		P62309	Small nuclear ribonucleoprotein G	Snrpg	+	+
0.736692	0.881457		P62315	Small nuclear ribonucleoprotein Sm D1	Snrpd1	+	+
-0.74969	0.719258		P62317;D3Z5N9	Small nuclear ribonucleoprotein Sm D2	Snrpd2;Gm5449	+	+
-0.52345	1.39033	+	P62320	Small nuclear ribonucleoprotein Sm D3	Snrpd3	+	+
0.70567	3.71455	+	P62334	26S protease regulatory subunit 10B	Psmc6
2.59807	2.50994	+	P62488	DNA-directed RNA polymerase II subunit RPB7	Polr2g
0.275915	0.899131		P62702;V9GWY0	40S ribosomal protein S4, X isoform;40S ribosomal protein S4	Rps4x;Gm15013
-0.159645	0.704681		P62717;F6YJW4	60S ribosomal protein L18a	Rpl18a;Gm17541
0.30739	1.52487	+	P62751;D3YTY6	60S ribosomal protein L23a	Rpl23a
0.391512	2.58064	+	P62754	40S ribosomal protein S6	Rps6
0.70332	2.6673	+	P62806	Histone H4	Hist1h4a
0.9311	2.9112	+	P62814;Q91YH6	V-type proton ATPase subunit B, brain isoform	Atp6v1b2
-0.0011925	0.00269786		P62827;Q14AA6;Q61820	GTP-binding nuclear protein Ran	Ran;1700009N14Rik
0.675083	2.05241	+	P62830;A2A6F8	60S ribosomal protein L23	Rpl23
-0.242877	0.459436		P62843	40S ribosomal protein S15	Rps15
0.112373	0.271835		P62849-2;P62849-3;P62849	40S ribosomal protein S24	Rps24
0.0619375	0.247878		P62852	40S ribosomal protein S25	Rps25
-0.780622	1.21032		P62855	40S ribosomal protein S26	Rps26
0.404743	0.776774		P62869;A6PWE0	Transcription elongation factor B polypeptide 2	Tceb2
0.370217	1.13694		P62889	60S ribosomal protein L30	Rpl30
1.17849	2.82961	+	P62892	60S ribosomal protein L39	Rpl39
0.232525	0.653126		P62900;A0A0A6YXL3;A0A0A6YX26	60S ribosomal protein L31	Rpl31
-0.247172	1.11247		P62908;D3YV43	40S ribosomal protein S3	Rps3
0.24146	0.723903		P62911;P17932	60S ribosomal protein L32	Rpl32
0.858498	3.948	+	P62918	60S ribosomal protein L8	Rpl8
0.507295	1.57271	+	P62960;A2BGG7;A0A0A0MQD2;B2RUF0;Q9Z2C8-2;Q9Z2C8	Nuclease-sensitive element-binding protein 1	Ybx1		+
0.196765	0.583919		P62984;A0A0A6YW67;E9Q9J0;E9Q5F6;E9QNP0;Q5SX22;P62983;P0CG49;P0CG50;E9Q4P0;J3QK04;D3YYZ2	Ubiquitin-60S ribosomal protein L40;Ubiquitin;60S ribosomal protein L40;Ubiquitin-40S ribosomal protein S27a;Ubiquitin;40S ribosomal protein S27a;Polyubiquitin-B;Ubiquitin;Polyubiquitin-C;Ubiquitin;Ubiquitin-related 1;Ubiquitin-related 2	Uba52;Ubc;Kxd1;Ubb;Rps27a;Gm7808
1.06096	4.13535	+	P63017;Q504P4;P17156;D3Z5E2;D3YW43;P16627;Q61696;P17879	Heat shock cognate 71 kDa protein	Hspa8		+
0.411668	1.62582	+	P63028;D3YU75	Translationally-controlled tumor protein	Tpt1
0.975923	3.37783	+	P63037;B1AXY1;B1AXY0;B1AXX9	DnaJ homolog subfamily A member 1	Dnaja1
0.467178	2.73774	+	P63038;P63038-2;D3Z2F2;D3Z7J9	60 kDa heat shock protein, mitochondrial	Hspd1
2.73939	4.64918	+	P63085;F6VEI7	Mitogen-activated protein kinase 1	Mapk1
0.858287	0.458129		P63087-2;A0A0G2JFF1;P63087;A0A0G2JGC1	Serine/threonine-protein phosphatase PP1-gamma catalytic subunit	Ppp1cc			+
0.848425	3.08826	+	P63101;D3YXN6;D3YXF4;D3YW45	14-3-3 protein zeta/delta	Ywhaz
-0.470098	1.58255	+	P63154	Crooked neck-like protein 1	Crnkl1	+	+	+
1.73537	4.11023	+	P63158;D3YVC6;D3YZ18	High mobility group protein B1	Hmgb1
-0.826405	1.67661	+	P63166;A0A087WRQ4	Small ubiquitin-related modifier 1	Sumo1			+
-0.361922	1.33424	+	P63168;Q9D0M5;Q80ZS7	Dynein light chain 1, cytoplasmic	Dynll1
-0.0788375	0.379015		P63260;P60710;E9Q1F2;E9Q5F4;G3UZ07;B1ATY1;E9Q606;G3UYG0;F8WGM8;E9Q2D1	Actin, cytoplasmic 2;Actin, cytoplasmic 2, N-terminally processed;Actin, cytoplasmic 1;Actin, cytoplasmic 1, N-terminally processed	Actg1;Actb
-0.40898	1.62094	+	P63276	40S ribosomal protein S17	Rps17
0.453093	1.30633	+	P63325;Q3UW83	40S ribosomal protein S10	Rps10
0.735605	3.33682	+	P67778;Q5SQG5	Prohibitin	Phb
2.66221	3.95303	+	P67871;G3UZA4;G3UXG7;G3UXU2;G3UZJ5;G3UZX4	Casein kinase II subunit beta	Csnk2b
0.933283	2.93886	+	P67984	60S ribosomal protein L22	Rpl22
0.0129875	0.0181476		P68040	Guanine nucleotide-binding protein subunit beta-2-like 1;Guanine nucleotide-binding protein subunit beta-2-like 1, N-terminally processed	Gnb2l1
0.830963	1.76308	+	P68134;P68033;P63268;P62737;D3YZY0;D3Z2K3;F6WX90;V9GXQ2;E9Q3M9	Actin, alpha skeletal muscle;Actin, alpha cardiac muscle 1;Actin, gamma-enteric smooth muscle;Actin, aortic smooth muscle	Acta1;Actc1;Actg2;Acta2
0.713808	3.0259	+	P68372;Q9D6F9	Tubulin beta-4B chain;Tubulin beta-4A chain	Tubb4b;Tubb4a
0.474548	2.20483	+	P68373;P68369;P05213	Tubulin alpha-1C chain;Tubulin alpha-1A chain;Tubulin alpha-1B chain	Tuba1c;Tuba1a;Tuba1b
1.66762	1.39033	+	P68510	14-3-3 protein eta	Ywhah
-0.4056	1.85693	+	P70168	Importin subunit beta-1	Kpnb1
-0.617252	2.20887	+	P70279;A2ALA0	Surfeit locus protein 6	Surf6
-0.13708	0.580581		P70288;Q8BQ10	Histone deacetylase 2	Hdac2
0.32254	1.01406		P70324-2;P70324	T-box transcription factor TBX3	Tbx3
1.68404	2.50372	+	P70353;A2A763;A2A762	Nuclear transcription factor Y subunit gamma	Nfyc
5.25e-05	0.000154975		P70371;Q3V252	Telomeric repeat-binding factor 1	Terf1
-0.368972	0.940516		P70372	ELAV-like protein 1	Elavl1
-1.5756	4.151	+	P70399-3;P70399;A2AU89;A2AU91;P70399-2;A2AU90;F6ZRL3;F7CE65	Tumor suppressor p53-binding protein 1	Tp53bp1;Trp53bp1
1.70271	1.44335	+	P70698	CTP synthase 1	Ctps1
0.679775	2.40178	+	P70700;A2AP84	DNA-directed RNA polymerase I subunit RPA2	Polr1b
1.73211	4.51453	+	P80313	T-complex protein 1 subunit eta	Cct7
1.62068	4.96857	+	P80314	T-complex protein 1 subunit beta	Cct2
1.59116	4.60513	+	P80315;G3UYW5;G3UXF3;G3UXG2	T-complex protein 1 subunit delta	Cct4
1.33348	4.7027	+	P80316;E0CZA1	T-complex protein 1 subunit epsilon	Cct5
1.39975	4.60587	+	P80317;E9QPA6;Q61390;B1AT05	T-complex protein 1 subunit zeta	Cct6a
1.39413	4.29478	+	P80318;Q3U0I3;E9Q133;F6Q609;F6ZVG8	T-complex protein 1 subunit gamma	Cct3
0.617365	1.80031	+	P83741-4;P83741-5;P83741;P83741-2;P83741-3;F6U2S8;E9PZ38;E9Q6Q2;E0CZE3;E9QMI9;E9QJQ9;E0CYT1;E9QMI8;E9QM73;P83741-6;Q80UE6;Q3UH66-6;Q3UH66-2;Q3UH66-7;Q3UH66-4;Q3UH66-3;Q3UH66;Q3UH66-5	Serine/threonine-protein kinase WNK1	Wnk1
-0.715252	3.34071	+	P83870	PHD finger-like domain-containing protein 5A	Phf5a		+	+
-0.29932	0.54878		P83882;A0A0A6YW33	60S ribosomal protein L36a	Rpl36a
1.01944	1.07335		P83887;Q8VCK3	Tubulin gamma-1 chain;Tubulin gamma-2 chain	Tubg1;Tubg2
-0.155723	0.942914		P83917;Q7TPM0;Q9CYJ8	Chromobox protein homolog 1	Cbx1
-1.16971	3.03354	+	P84089;G3UW85	Enhancer of rudimentary homolog	Erh
-0.443495	1.56754	+	P84104-2;P84104;A2A4X6	Serine/arginine-rich splicing factor 3	Srsf3;Gm12355			+
0.148482	0.603226		P84228;P68433;F8WI35;P84244;P02301;E0CZ27;E0CYR7;E0CYN1	Histone H3.2;Histone H3.1;Histone H3;Histone H3.3;Histone H3.3C	Hist1h3b;Hist1h3a;H3f3a;H3f3c
0.951677	4.29478	+	P97310	DNA replication licensing factor MCM2	Mcm2
0.650842	1.5444	+	P97314	Cysteine and glycine-rich protein 2	Csrp2
0.122798	0.386914		P97329	Kinesin-like protein KIF20A	Kif20a
0.34393	1.33485	+	P97351	40S ribosomal protein S3a	Rps3a
-0.359972	1.4124	+	P97376	Protein FRG1	Frg1	+	+
1.18592	4.59045	+	P97377-2;P97377;Q80YP0;Q80YP0-2	Cyclin-dependent kinase 2	Cdk2
0.320795	1.60362	+	P97379-2;P97379	Ras GTPase-activating protein-binding protein 2	G3bp2
0.660953	3.04012	+	P97452	Ribosome biogenesis protein BOP1	Bop1
0.979017	2.44507	+	P97477;P97477-2	Aurora kinase A	Aurka
0.469357	2.84278	+	P97855	Ras GTPase-activating protein-binding protein 1	G3bp1
-1.67419	1.63142	+	P97868-2;P97868	E3 ubiquitin-protein ligase RBBP6	Rbbp6
0.31546	1.2051		P98203-4;P98203-5;P98203-2;P98203;P98203-3	Armadillo repeat protein deleted in velo-cardio-facial syndrome homolog	Arvcf
0.763092	3.37405	+	P99024;G3UZR1	Tubulin beta-5 chain	Tubb5
0.222812	0.691355		P99027	60S acidic ribosomal protein P2	Rplp2
0.965337	2.36256	+	Q00422	GA-binding protein alpha chain	Gabpa
1.08695	0.921745		Q00547-2;Q00547	Hyaluronan mediated motility receptor	Hmmr
0.608847	2.18576	+	Q00899;Q3TTC2	Transcriptional repressor protein YY1	Yy1
-0.52599	2.83939	+	Q00PI9	Heterogeneous nuclear ribonucleoprotein U-like protein 2	Hnrnpul2
0.138905	0.90166		Q01320	DNA topoisomerase 2-alpha	Top2a
0.684207	3.51579	+	Q01853	Transitional endoplasmic reticulum ATPase	Vcp
0.365912	1.22415		Q02053;P31254	Ubiquitin-like modifier-activating enzyme 1	Uba1
-0.427822	1.10894		Q02105	Complement C1q subcomponent subunit C	C1qc
-0.03306	0.107073		Q02248;E9Q6A9;F7BAC9;F6QZ47;D3YUH4;F7CRC6	Catenin beta-1	Ctnnb1
-0.0848925	0.245353		Q02257	Junction plakoglobin	Jup
0.361368	1.86615	+	Q03265;D3Z6F5;D6RJ16	ATP synthase subunit alpha, mitochondrial;ATP synthase subunit alpha	Atp5a1
1.49442	1.85126	+	Q04447	Creatine kinase B-type	Ckb
2.07044	2.38739	+	Q04692-2;Q04692	SWI/SNF-related matrix-associated actin-dependent regulator of chromatin subfamily A containing DEAD/H box 1	Smarcad1
-0.140997	0.858931		Q04750;Q8R4U6	DNA topoisomerase 1	Top1
0.14741	0.770336		Q05CL8;A2AMD0;Q05CL8-2	La-related protein 7	Larp7
-0.580618	2.05071	+	Q05D44	Eukaryotic translation initiation factor 5B	Eif5b
0.124467	0.127871		Q07076	Annexin A7	Anxa7
-0.15275	0.294563		Q07133;I7HFT9	Histone H1t	Hist1h1t
0.452015	2.16323	+	Q07832	Serine/threonine-protein kinase PLK1	Plk1
-0.256605	0.437649		Q08288;D3Z5X8;D3Z7N3;D3Z345	Cell growth-regulating nucleolar protein	Lyar
-2.73421	5.0265	+	Q0VBL3		Rbm15
-0.162908	0.517635		Q14B71;D3YZE8;D3Z5P7;Q14B71-2	Cell division cycle-associated protein 2	Cdca2
-0.248138	0.657414		Q1PSW8	E3 ubiquitin-protein ligase TRIM71	Trim71
-1.06991	3.73023	+	Q2KN98	Cytospin-A	Specc1l
-0.265883	0.853134		Q3KR45		Dnmt3b
0.435872	2.68049	+	Q3TA68;Q3TAQ9		Wdr36
-0.369225	0.464071		Q3TE40;Q62193;F6V8R7	Replication protein A 32 kDa subunit	Rpa2
0.489418	2.1724	+	Q3TFP0;Q9R0U0-3;Q9R0U0-2;Q9R0U0;A3KG57	Serine/arginine-rich splicing factor 10	Srsf10			+
0.540582	2.57881	+	Q3THK7	GMP synthase [glutamine-hydrolyzing]	Gmps
-0.145377	0.47186		Q3THM8;O08579;B7FAU5;I7HJS1	Emerin	Emd
0.824653	2.90723	+	Q3THS6;Q91X83	S-adenosylmethionine synthase isoform type-2	Mat2a
0.939998	3.63011	+	Q3THW5;P0C0S6;Q8R029;G3UWL7;Q3UA95	Histone H2A.V;Histone H2A.Z;Histone H2A	H2afv;H2afz
-1.33979	1.50176	+	Q3TIX9	U4/U6.U5 tri-snRNP-associated protein 2	Usp39		+
0.668787	3.04012	+	Q3TJM4	Centromere protein T	Cenpt
-0.262518	1.23302		Q3TKT4;Q3TKT4-2;G3UX35;H3BJM2;H3BJI1;H3BLI4;Q9D007;H3BKJ3;H3BK47	Transcription activator BRG1	Smarca4
1.08822	1.42457	+	Q3TLP8;P63001;A2AC13;P60764	Ras-related C3 botulinum toxin substrate 1	Rac1
1.69265	4.90855	+	Q3TML0;Q922R8	Protein disulfide-isomerase A6	Pdia6
0.577275	2.09228	+	Q3TRH2;Q9D8W5;B1AT36	26S proteasome non-ATPase regulatory subunit 12	Psmd12
0.439625	1.60229	+	Q3TUE1;A0A0G2JGW9;A0A0G2JFY5;Q3UUU2;Q91WJ8;Q91WJ8-2;A0A0G2JG00;A0A0G2JFK2	Far upstream element-binding protein 1	Fubp1
-0.4689	2.24411	+	Q3TUQ5;O35691	Pinin	Pnn	+	+	+
1.61763	3.31445	+	Q3TWV4;P84091	AP-2 complex subunit mu	Ap2m1
-0.53228	1.6	+	Q3TWW8;A0A0A6YXX6	Serine/arginine-rich splicing factor 6	Srsf6			+
-1.64813	2.26917	+	Q3TYA6	M-phase phosphoprotein 8	Mphosph8
0.01604	0.0343715		Q3TZX8-3;Q3TZX8-2;Q3TZX8	Polynucleotide 5-hydroxyl-kinase NOL9	Nol9
-0.274238	1.62163	+	Q3U0V1;A0A0G2JE55;A0A0G2JGT1	Far upstream element-binding protein 2	Khsrp
0.412502	0.443399		Q3U1G5	Interferon-stimulated 20 kDa exonuclease-like 2	Isg20l2
-0.404147	1.76225	+	Q3U1J4	DNA damage-binding protein 1	Ddb1
0.033705	0.0399981		Q3U2G2;Q61316	Heat shock 70 kDa protein 4	Hspa4
-0.67722	3.1013	+	Q3U3A7;E9Q794;Q3UII8;Q924K8-2;Q924K8;H3BLE1;H3BIY7	Metastasis-associated protein MTA3	Mta3
0.509125	2.24362	+	Q3U4W8;P56399;D3YYA5;D3Z4K7	Ubiquitin carboxyl-terminal hydrolase;Ubiquitin carboxyl-terminal hydrolase 5	Usp5
0.66213	3.02846	+	Q3U4X8;P37913;V9GWZ4;E9PV36;D3YUW4	DNA ligase;DNA ligase 1	Lig1
-0.27386	1.60711	+	Q3U741;Q501J6;Q501J6-2	Probable ATP-dependent RNA helicase DDX17	Ddx17
0.30174	1.13249		Q3U821		Wdr75
-0.05969	0.0572045		Q3U9G9;A0A0A6YXT6;A0A0A6YW01;A0A0A6YXW3;A0A0A6YWS3;A0A0A6YY12	Lamin-B receptor	Lbr
0.205375	1.26868		Q3UC82;Q80ZH7;K4DI59;P97386;B1AT03;P97386-2;Q3TJN5;G3UYI8	DNA ligase;DNA ligase 3	Lig3
-0.0620025	0.166524		Q3UEB3-2;Q3UEB3;Q3UEB3-3	Poly(U)-binding-splicing factor PUF60	Puf60
1.65646	1.40914	+	Q3UF95;Q9Z1R2;G3UYQ2;G3UZT6;Q3TDL4;S4R224	Large proline-rich protein BAG6	Bag6
-0.556435	1.42457	+	Q3UFM5	Nucleolar MIF4G domain-containing protein 1	Nom1
1.31713	1.65552	+	Q3UFY0	Ribosomal RNA processing protein 36 homolog	Rrp36
-0.445223	0.935971		Q3UH06-2;Q3UH06;Q3UH06-3;Q3UH06-4;F6UB40	Ras-responsive element-binding protein 1	Rreb1			+
-1.4951	4.15347	+	Q3UH28;Q3U1M7;A2A483;E9Q8D1;A2A482;A2A484;A2A485;A2A481;A2A480		Zmynd8
0.102063	0.452142		Q3UH59;Q61879;Q5SV64;Q8BXF2	Myosin-10	Myh10
-1.13365	1.60711	+	Q3UH70;Q9ESU6;B0V2V6;B0V2V8;Q9ESU6-2;D6RGP2;Q91Y44	Bromodomain-containing protein 4	Brd4
0.286728	1.51494	+	Q3UI84;Q99J62;D6RGM1;D3Z7I8	Replication factor C subunit 4	Rfc4
-0.352533	1.81157	+	Q3UIL6-2;Q3UIL6;Q3UIL6-6;Q3UIL6-3;Q3UIL6-4;Q3UIL6-5;S4R190;S4R243	Pleckstrin homology domain-containing family A member 7	Plekha7
-0.340232	2.25972	+	Q3UJB0		Sf3b2	+	+
-0.450317	1.03868		Q3UKJ7;Q3UKJ7-2	WD40 repeat-containing protein SMU1;WD40 repeat-containing protein SMU1, N-terminally processed	Smu1
-0.379393	0.424552		Q3UL36;Q3UL36-2	Arginine and glutamate-rich protein 1	Arglu1
-1.04402	1.32804	+	Q3ULB3;A2APA8;Q61312;Q8BPN4;E9Q5N4;Q8CE69;P34056-2;P34056-3;P34056;Q6VUP9;Q91ZK0;Q61313;P34056-4	Transcription factor AP-2 gamma	Tfap2c
0.149335	0.574359		Q3ULG5;P97311	DNA replication licensing factor MCM6	Mcm6
1.1652	3.38893	+	Q3UM18-2;Q3UM18;D6RFS1	Large subunit GTPase 1 homolog	Lsg1
-0.04089	0.098161		Q3UMU9-4;Q3UMU9-2;Q3UMU9;Q3UMU9-3	Hepatoma-derived growth factor-related protein 2	Hdgfrp2
-0.66541	3.38893	+	Q3UNN4;P97496-2;P97496;Q3UZD0	SWI/SNF complex subunit SMARCC1	Smarcc1
-0.961888	1.48291	+	Q3URQ0;F6ZZ61	Testis-expressed sequence 10 protein	Tex10
-0.148418	0.566234		Q3URR7-2;Q3URR7;E9PXB1;Q3URR7-3;E9PV84;D3YVM1;D3Z3Z6;D3YWR9;E9PX93	Zinc finger and SCAN domain-containing protein 10	Zscan10
-0.823427	2.27795	+	Q3URS2	Zinc finger and SCAN domain containing protein 4F	Zscan4f
-1.14611	1.65595	+	Q3US17	Zinc finger protein 48	Znf48
-1.41803	2.54159	+	Q3USH5;A0A0G2JDQ9	Splicing factor, suppressor of white-apricot homolog	Sfswap
-2.92069	2.3287	+	Q3UWZ4;B1B0V2		AU022751
0.669893	0.933785		Q3UXU8;Q8K2X3	CST complex subunit STN1	Obfc1
-0.349325	1.06577		Q3UYV9	Nuclear cap-binding protein subunit 1	Ncbp1
1.49033	3.41974	+	Q3V117;Q91V92;Q3TS02	ATP-citrate synthase	Acly
-0.684002	2.2781	+	Q3V1H1	Cytoskeleton-associated protein 2	Ckap2
-0.359723	1.48236	+	Q3V1V3	ESF1 homolog	Esf1
0.0187725	0.00623003		Q3V1Z5	40S ribosomal protein S4	Rps4l
0.32228	1.46345	+	Q3V300	Kinesin-like protein KIF22	Kif22
2.4074	4.02215	+	Q3V3R1	Monofunctional C1-tetrahydrofolate synthase, mitochondrial	Mthfd1l
2.17627	2.09228	+	Q4FE56;P70398;E9PWA9	Ubiquitin carboxyl-terminal hydrolase;Probable ubiquitin carboxyl-terminal hydrolase FAF-X	Usp9x
-0.751713	3.09044	+	Q4FK66	Pre-mRNA-splicing factor 38A	Prpf38a		+
0.0277475	0.0678586		Q4FZF3	Probable ATP-dependent RNA helicase DDX49	Ddx49
1.38891	1.25096		Q4VAC9-2;Q4VAC9;Q4VAC9-5	Pleckstrin homology domain-containing family G member 3	Plekhg3
0.281278	0.911937		Q4VBE8	WD repeat-containing protein 18	Wdr18
0.611895	3.1013	+	Q52KC3;P49718	DNA replication licensing factor MCM5	Mcm5
-1.79325	1.66943	+	Q549C9;P02340;I7HIK9;Q80ZA1	Cellular tumor antigen p53	Trp53;Tp53
-0.302212	0.944763		Q569Z5;F8WHR6;Q569Z5-2	Probable ATP-dependent RNA helicase DDX46	Ddx46			+
-1.82487	2.34183	+	Q5DTT3	Protein FAM208B	Fam208b
-0.0241075	0.0610889		Q5EBP8;P49312;P49312-2	Heterogeneous nuclear ribonucleoprotein A1;Heterogeneous nuclear ribonucleoprotein A1, N-terminally processed	Hnrnpa1	+	+
0.654815	1.80742	+	Q5F258;Q68FF6	ARF GTPase-activating protein GIT1	Git1
1.06496	2.94547	+	Q5NCY0	Lysine-specific demethylase 6B	Kdm6b
-0.635857	2.89656	+	Q5RJG1	Nucleolar protein 10	Nol10
-1.20178	2.50088	+	Q5RL57;Q9R0L7	A-kinase anchor protein 8-like	Akap8l
1.15054	4.35579	+	Q5SFM8-3;Q5SFM8-2;Q5SFM8	RNA-binding protein 27	Rbm27			+
-1.14026	1.14205		Q5SPL2;Q5SS87;Q5SPL2-2	PHD finger protein 12	Phf12
0.26928	0.923415		Q5SQ20;Q9EQ61	Pescadillo homolog	Pes1
-0.83284	2.73362	+	Q5SS00;B1AU71	DBF4-type zinc finger-containing protein 2 homolog	Zdbf2
-0.107105	0.495514		Q5SSI6	U3 small nucleolar RNA-associated protein 18 homolog	Utp18
1.88714	3.72061	+	Q5SSZ5	Tensin-3	Tns3
-0.08418	0.14851		Q5SUF2;Q5SUF2-3;Q5SUF2-2;F8WGA8	Luc7-like protein 3	Luc7l3			+
0.39738	2.10354	+	Q5SUT0;Q5SUS9;Q61545	RNA-binding protein EWS	Ewsr1
-0.280788	1.18176		Q5SV02;P70388;P70388-2;E9PUJ2;A8Y5I3;P70388-4;P70388-3	DNA repair protein RAD50	Rad50
-0.420567	1.88133	+	Q5SVQ0-4;Q5SVQ0-2;Q5SVQ0-3;Q5SVQ0;Q5SVQ0-5;F6S4B9	Histone acetyltransferase KAT7	Kat7
0.262775	1.05952		Q5SWD9;Q5SWD9-2;Q5SWD9-3	Pre-rRNA-processing protein TSR1 homolog	Tsr1
1.1649	4.07467	+	Q5SWN2;Q8VEE4	Replication protein A 70 kDa DNA-binding subunit;Replication protein A 70 kDa DNA-binding subunit, N-terminally processed	Rpa1
-0.90663	3.88799	+	Q5SWZ5;P97434-3;P97434;P97434-5;P97434-2;F6S5I0;F6RND9;P97434-4;F6XZM9	Myosin phosphatase Rho-interacting protein	Mprip
0.6612	3.17504	+	Q5SXR6;Q68FD5;F6Z1R4	Clathrin heavy chain;Clathrin heavy chain 1	Cltc
-0.462058	1.71868	+	Q5SYD0;Q5SYD0-2	Unconventional myosin-Id	Myo1d
-0.185515	0.670233		Q5U4C3	Splicing factor, arginine/serine-rich 19	Scaf1
1.19792	1.55858	+	Q5U4C5;Q8VI75;D6RES6	Importin-4	Ipo4
-0.77456	2.40264	+	Q5XJE5	RNA polymerase-associated protein LEO1	Leo1
-0.0054175	0.00621703		Q60520;Q60520-1	Paired amphipathic helix protein Sin3a	Sin3a
-0.111315	0.299765		Q60596	DNA repair protein XRCC1	Xrcc1
-0.4142	2.03892	+	Q60605-2;Q60605;Q8CI43	Myosin light polypeptide 6	Myl6
0.0106175	0.0326691		Q60668-3;Q60668;F6ZV59;G5E8G0;G3X9W0;Q60668-4;Q60668-2;E9Q5B6;F6SHF3;A0A0G2JFL4;F7A465;Q9D3U4	Heterogeneous nuclear ribonucleoprotein D0	Hnrnpd
0.168747	0.250322		Q60737;Q6NSS6;A2ANR6	Casein kinase II subunit alpha	Csnk2a1
0.11718	0.158624		Q60749;Q9WU01;A0A087WSL3;A0A087WR32;Q9WU01-2	KH domain-containing, RNA-binding, signal transduction-associated protein 1	Khdrbs1
-0.0400875	0.0576714		Q60793	Krueppel-like factor 4	Klf4
2.11259	4.28946	+	Q60817;P70670	Nascent polypeptide-associated complex subunit alpha;Nascent polypeptide-associated complex subunit alpha, muscle-specific form	Naca
0.637367	3.69832	+	Q60848-2;Q60848;D3Z414	Lymphocyte-specific helicase	Hells
0.12949	0.336191		Q60862;Q59IX1;A0A087WSP9;A0A087WPP9	Origin recognition complex subunit 2	Orc2
2.27995	3.88847	+	Q60864	Stress-induced-phosphoprotein 1	Stip1
0.47386	1.39869	+	Q60865;F6YLI0	Caprin-1	Caprin1
-0.87627	2.80358	+	Q60953;D3Z3A6;D3YXR5;Q60953-2;F7BTZ2;D6RII9;D3Z2V0	Protein PML	Pml
-0.163302	0.103713		Q60972	Histone-binding protein RBBP4	Rbbp4
1.90411	2.79786	+	Q60I23;P48432;A2AM37;Q811W0;P53784;P53783	Transcription factor SOX-2	Sox2
2.07454	5.0265	+	Q61024;D3YYR0;D3Z0C2	Asparagine synthetase [glutamine-hydrolyzing]	Asns
0.628158	2.45428	+	Q61029;Q61029-3;Q61029-2;Q61029-4;Q61033-2	Lamina-associated polypeptide 2, isoforms beta/delta/epsilon/gamma	Tmpo
0.414845	1.85693	+	Q61033	Lamina-associated polypeptide 2, isoforms alpha/zeta	Tmpo
-0.02572	0.0535613		Q61074	Protein phosphatase 1G	Ppm1g
0.63816	2.38739	+	Q61081	Hsp90 co-chaperone Cdc37;Hsp90 co-chaperone Cdc37, N-terminally processed	Cdc37
-1.08311	3.23031	+	Q61136	Serine/threonine-protein kinase PRP4 homolog	Prpf4b	+	+
0.10537	0.328312		Q61142-2;Q61142	Spindlin-1	Spin1
0.309252	0.859394		Q61164;A2APF3;A2APF3-2	Transcriptional repressor CTCF	Ctcf
1.506	2.56194	+	Q61166	Microtubule-associated protein RP/EB family member 1	Mapre1
-0.351618	0.577614		Q61169-2;Q61169	Transcription factor GATA-6	Gata6
0.324055	1.63199	+	Q61216;Q61216-2;F6RX99;B2KF76	Double-strand break repair protein MRE11A	Mre11a
0.14005	0.343019		Q61235	Beta-2-syntrophin	Sntb2
-0.161788	0.426378		Q61466;Q61466-2;A0A0G2JG60;Q6P9Z1	SWI/SNF-related matrix-associated actin-dependent regulator of chromatin subfamily D member 1	Smarcd1
1.40632	1.65075	+	Q61510;Q5SU72;Q5SU71	E3 ubiquitin/ISG15 ligase TRIM25	Trim25
-0.148545	0.799454		Q61550;R4GML2;A2AU37	Double-strand-break repair protein rad21 homolog	Rad21
0.191447	0.919115		Q61584-4;Q61584-7;Q61584-3;Q61584;A0A0G2JEP0;Q61584-5;Q61584-6;Q61584-2;A0A0G2JGL6;A0A0G2JGH0	Fragile X mental retardation syndrome-related protein 1	Fxr1
1.54974	2.76336	+	Q61598-2;Q61598	Rab GDP dissociation inhibitor beta	Gdi2
1.09145	3.74086	+	Q61624	Zinc finger protein 148	Znf148
2.70814	4.35642	+	Q61655;Q8R3C7;Q8BZY3	ATP-dependent RNA helicase DDX19A	Ddx19a;Ddx19b
-0.523495	1.73672	+	Q61686	Chromobox protein homolog 5	Cbx5
-0.633875	2.5489	+	Q61687;F6RDB7;A0A0G2JFA5;Q8C2S3;Q3UY26;A6PWK7;A0A0G2JFG6;A0A0G2JF42;A0A0G2JGH3;A6PWK8;Q3TA30;A6PWK9;A0A0G2JED2;A6PWL2	Transcriptional regulator ATRX	Atrx
1.8319	5.0265	+	Q61753;F6ZSB7	D-3-phosphoglycerate dehydrogenase	Phgdh
-0.190985	0.263863		Q61768;E9QAK5;P28738;P33175	Kinesin-1 heavy chain	Kif5b
-3.5993	5.69237	+	Q61781	Keratin, type I cytoskeletal 14	Krt14
0.561187	1.70931	+	Q61846	Maternal embryonic leucine zipper kinase	Melk
0.941935	3.71419	+	Q61881;D3Z6N3;D3Z335;D3Z0J6;D3Z2K9	DNA replication licensing factor MCM7	Mcm7
-1.16178	3.26042	+	Q61937;Q5SQB0;E9Q5T3;Q9DAY9;Q5SQB5	Nucleophosmin	Npm1;Gm5611			+
-0.26942	0.932886		Q62018-2;Q62018-3;Q62018	RNA polymerase-associated protein CTR9 homolog	Ctr9			+
0.620082	2.54808	+	Q62093	Serine/arginine-rich splicing factor 2	Srsf2		+	+
0.321375	0.256174		Q62141-2;Q62141-3;Q62141-1;Q62141	Paired amphipathic helix protein Sin3b	Sin3b
0.354148	0.704734		Q62158	Zinc finger protein RFP	Trim27
-0.162515	0.869005		Q62167;P16381;Q62095;Q3V086;Q61496	ATP-dependent RNA helicase DDX3X;Putative ATP-dependent RNA helicase Pl10;ATP-dependent RNA helicase DDX3Y	Ddx3x;D1Pas1;Ddx3y			+
-1.2435	2.76989	+	Q62187	Transcription termination factor 1	Ttf1
0.60506	1.12845		Q62241	U1 small nuclear ribonucleoprotein C	Snrpc		+
0.674758	3.54551	+	Q62261;A0A0A0MQG2;E9Q397;Q3UGX2;P15508;D3YWH8	Spectrin beta chain, non-erythrocytic 1	Sptbn1
-0.412602	1.60322	+	Q62311;D3Z0T0;D3Z5H6	Transcription initiation factor TFIID subunit 6	Taf6
0.06513	0.198697		Q62315;Q62315-2;G3UZT8;G3UZW3;G3UXE0;G3UZQ8;G3UYY7	Protein Jumonji	Jarid2
0.106765	0.380993		Q62318;Q62318-2	Transcription intermediary factor 1-beta	Trim28
-0.159057	0.500869		Q62376;Q62376-2	U1 small nuclear ribonucleoprotein 70 kDa	Snrnp70		+	+
-0.165137	1.02973		Q62383	Transcription elongation factor SPT6	Supt6h
0.0757375	0.334455		Q62425	Cytochrome c oxidase subunit NDUFA4	Ndufa4
-0.12865	0.433989		Q62448-2;Q62448	Eukaryotic translation initiation factor 4 gamma 2	Eif4g2
1.5496	2.09665	+	Q62465	Synaptic vesicle membrane protein VAT-1 homolog	Vat1
1.39844	1.42638	+	Q62521-2;Q62521;A2AWK6;P46684;Q7TQ40;F8VPV3;Q62520;A2AWK4;H3BK19;Q14DI0;Q9R166;E9QAH2;Q3UZD5-3;Q3UZD5-2;Q8BZ89;Q3UZD5-4;Q3UZD5;Q7TSI0-2;Q7TSI0;Q8K083	Zinc finger protein ZIC 3;Zinc finger protein ZIC 1;Zinc finger protein ZIC 5	Zic3;Zic1;Zic5
-0.239487	0.695791		Q63850;G3UZB1	Nuclear pore glycoprotein p62	Nup62
1.85012	1.1555		Q63871;Q8BFX0	DNA-directed RNA polymerases I, II, and III subunit RPABC4	Polr2k
-0.625472	3.58745	+	Q64012-2;A2AU61;A2AU62;Q64012;A2AU60	RNA-binding protein Raly	Raly	+	+
-0.171497	0.803536		Q640M1;Q640M1-2	U3 small nucleolar RNA-associated protein 14 homolog A	Utp14a
-1.02061	3.26042	+	Q64127-2;Q64127;E9Q1U8	Transcription intermediary factor 1-alpha	Trim24
2.17958	3.30657	+	Q64152-2;Q64152	Transcription factor BTF3	Btf3
-1.27059	0.490658		Q642K5;P62862	40S ribosomal protein S30	Fau
-0.768132	1.36782	+	Q64368	Deleted in azoospermia-like	Dazl
-0.04531	0.144834		Q64511;F6U5K2;F6XX57	DNA topoisomerase 2-beta	Top2b
1.14346	3.83134	+	Q64737;D6RCG1;Q64737-2	Trifunctional purine biosynthetic protein adenosine-3;Phosphoribosylamine--glycine ligase;Phosphoribosylformylglycinamidine cyclo-ligase;Phosphoribosylglycinamide formyltransferase	Gart
-0.289938	0.371035		Q66JV4;Q66JV4-2;Q80YR9	RNA-binding protein 12B-B;RNA-binding protein 12B-A	Rbm12b2;Rbm12b1
0.328288	0.267454		Q66JV6;Q9WUJ8;Q3TQX1	Origin recognition complex subunit 6	Orc6
2.58206	3.74121	+	Q68FG2		Sptbn2
-1.28081	2.37018	+	Q69Z61-2;Q69Z61;Z4YKW0	PWWP domain-containing protein 2A	Pwwp2a
-0.395778	1.5731	+	Q69Z99	Zinc finger protein 512	Znf512
-0.228585	0.605685		Q69ZQ2	Pre-mRNA-splicing factor ISY1 homolog	Isy1		+
-1.28123	3.08555	+	Q69ZR9-2;Q69ZR9	Protein FAM208A	Fam208a
0.734638	1.06183		Q6A028	Switch-associated protein 70	Swap70
-0.372897	2.46254	+	Q6A068	Cell division cycle 5-like protein	Cdc5l	+	+	+
-0.183505	0.842108		Q6DFW4;A0A0A0MQ76;A0A087WQ46;A0A087WSL8;A0A087WSU5;A0A087WP00;A0A087WNW0	Nucleolar protein 58	Nop58
-0.197332	0.965431		Q6DID5;D3Z468	PWWP domain-containing protein MUM1	Mum1
0.572462	1.90004	+	Q6GT24;O08709;D3Z0Y2;A0A0A6YXQ7;Q8BG37	Peroxiredoxin-6	Prdx6
-1.19943	1.90219	+	Q6IE82	Protein Jade-3	Jade3
-0.341438	1.88487	+	Q6IQX8;Q8C0Q5;Q499D5;G3X9T1;P24399;Q8BPP0;Q80YP6;B2RUI1		Zfp219
0.738325	3.26819	+	Q6J1H4;Q6J1H4-2	Undifferentiated embryonic cell transcription factor 1	Utf1
-0.0390975	0.128519		Q6KCD5-2;Q6KCD5	Nipped-B-like protein	Nipbl
0.23859	1.20692		Q6NS46	Protein RRP5 homolog	Pdcd11
-0.0990725	0.279892		Q6NSP9;P52927	High mobility group protein HMGI-C	Hmga2
0.075545	0.0491785		Q6NV66;D3Z083		Zfp646
-0.627545	2.88514	+	Q6NV83-3;Q6NV83-2;Q6NV83;A0A087WRG2;A0A087WR93	U2 snRNP-associated SURP motif-containing protein	U2surp
-2.26692	4.35642	+	Q6NZF1;A0A0A6YXN6;A0A0A6YWW2;A0A0A6YXI9	Zinc finger CCCH domain-containing protein 11A	Zc3h11a
0.193775	0.804626		Q6NZL1;A0A0G2JG93		Dhx37
0.0883075	0.302658		Q6NZQ2		Ddx31
-0.353945	0.747152		Q6P3Y5-2;Q6P3Y5-3;Q6P3Y5	Zinc finger protein 280C	Znf280c
-0.327327	1.87008	+	Q6P4T2	U5 small nuclear ribonucleoprotein 200 kDa helicase	Snrnp200	+	+
-0.005395	0.00755798		Q6P542	ATP-binding cassette sub-family F member 1	Abcf1
-0.916242	3.50961	+	Q6P5B0	RRP12-like protein	Rrp12
-0.246795	0.786572		Q6P5B5;Q9WVR4	Fragile X mental retardation syndrome-related protein 2	Fxr2
-0.274485	1.95568	+	Q6P5D8	Structural maintenance of chromosomes flexible hinge domain-containing protein 1	Smchd1
0.220963	0.664088		Q6P5E3;Q9ER74	Sal-like protein 1	Sall1
-0.333352	1.21062		Q6P5H2-2;Q6P5H2	Nestin	Nes
-0.0869925	0.221525		Q6P8N8;Q9JHS4;F7BB92	ATP-dependent Clp protease ATP-binding subunit clpX-like, mitochondrial	Clpx
0.146495	0.293		Q6P8X1	Sorting nexin-6;Sorting nexin-6, N-terminally processed	Snx6
1.3326	1.37249	+	Q6P9P6	Kinesin-like protein KIF11	Kif11
-0.049545	0.251067		Q6P9R1	ATP-dependent RNA helicase DDX51	Ddx51
0.873765	3.85785	+	Q6PAC3	DDB1- and CUL4-associated factor 13	Dcaf13
0.420135	0.413232		Q6PAL0	BEN domain-containing protein 3	Bend3
-0.364102	2.09665	+	Q6PAL7	AT-hook DNA-binding motif-containing protein 1	Ahdc1
1.65237	3.08592	+	Q6PB44-2;Q6PB44	Tyrosine-protein phosphatase non-receptor type 23	Ptpn23
0.282508	1.34131	+	Q6PB66	Leucine-rich PPR motif-containing protein, mitochondrial	Lrpprc
1.48671	1.91101	+	Q6PB82;O70405	Serine/threonine-protein kinase ULK1	Ulk1
0.509337	1.12365		Q6PCM2;Q6PCM2-2;F6WNG1;Q6PCM2-3;Q8BND4	Integrator complex subunit 6	Ints6
-0.707207	3.53299	+	Q6PE01	U5 small nuclear ribonucleoprotein 40 kDa protein	Snrnp40	+	+
0.108688	0.592212		Q6PFB2;Q8VE37;A2CER2	Regulator of chromosome condensation	Rcc1
0.230467	0.144834		Q6PFD6;Q91WD7	Kinesin-like protein KIF18B	Kif18b
-0.301155	1.26277		Q6PFD9	Nuclear pore complex protein Nup98-Nup96;Nuclear pore complex protein Nup98;Nuclear pore complex protein Nup96	Nup98
-1.62034	1.31141	+	Q6PFF0;Q7TSH6;Q6DID3		Scaf4
0.11945	0.512028		Q6PGF5		Bms1
0.920212	3.18993	+	Q6PGG6;A2ALP3	Guanine nucleotide-binding protein-like 3-like protein	Gnl3l
-0.252758	0.51077		Q6PIJ4;D6RD05;D6RHP5	Nuclear factor related to kappa-B-binding protein	Nfrkb
-0.149605	0.778245		Q6PR54;Q6PR54-3;Q6PR54-2	Telomere-associated protein RIF1	Rif1
1.49808	1.41871	+	Q6Q783;D3Z2F5	Histone-lysine N-methyltransferase SUV420H2	Suv420h2
-0.153803	0.262733		Q6R891;Q6R891-2;A2AV96;Q9D5U8-2;Q9D5U8	Neurabin-2	Ppp1r9b
0.47551	1.81413	+	Q6ZPI0;Q6ZPI0-2;A0A0A6YWV0;A0A0A6YWS2;A0A0A6YXU2;A2AA59;Q6ZQF7-2;Q6ZQF7	Protein Jade-1	Jade1
0.755583	1.54591	+	Q6ZPJ3	E2/E3 hybrid ubiquitin-protein ligase UBE2O	Ube2o
0.37881	1.97027	+	Q6ZPV2-2;Q6ZPV2;Z4YL66	DNA helicase INO80	Ino80
2.04787	2.02239	+	Q6ZQ08;Q6ZQ08-4;B7ZWL1;Q6ZQ08-2;Q6ZQ08-3	CCR4-NOT transcription complex subunit 1	Cnot1
2.00592	4.82572	+	Q6ZQ38;D3YWC5	Cullin-associated NEDD8-dissociated protein 1	Cand1
0.357102	0.928182		Q6ZQ73	Cullin-associated NEDD8-dissociated protein 2	Cand2
0.330313	1.74121	+	Q6ZQL4	WD repeat-containing protein 43	Wdr43
0.763435	3.55989	+	Q6ZWN5;F7CJS8;D3YWH9;Q9CXW7;D3Z673;D3YUV6	40S ribosomal protein S9	Rps9
0.584355	1.87008	+	Q6ZWQ9;Q3THE2;Q9CQ19;D3Z249;D3YV37	Myosin regulatory light chain 12B	Myl12a;Myl12b
0.478635	2.15687	+	Q6ZWV3;I7HLV2;P86048;B7FAU6	60S ribosomal protein L10;60S ribosomal protein L10-like	Rpl10;Rpl10l
0.319117	0.99765		Q6ZWV7;G3UWD7	60S ribosomal protein L35	Rpl35;Gm10269
1.10838	4.60587	+	Q6ZWX6	Eukaryotic translation initiation factor 2 subunit 1	Eif2s1
3.82508	2.0427	+	Q6ZWZ4;D3YX71;P47964	60S ribosomal protein L36	Rpl36;Gm8973
0.60217	1.6552	+	Q6ZWZ6;P63323	40S ribosomal protein S12	Rps12
0.405185	1.85693	+	Q6ZWZ7;Q9CPR4;B2RY53	60S ribosomal protein L17	Rpl17
-0.3719	1.52083	+	Q76KJ5	DNA-directed RNA polymerase I subunit RPA34	Cd3eap
0.232485	0.846603		Q76MZ3;G3UXQ1;H3BJ83	Serine/threonine-protein phosphatase 2A 65 kDa regulatory subunit A alpha isoform	Ppp2r1a
1.8565	1.7626	+	Q78IK2	Up-regulated during skeletal muscle growth protein 5	Usmg5
0.333437	0.193442		Q78PY7;Q3TJ56	Staphylococcal nuclease domain-containing protein 1	Snd1
-0.727565	2.49487	+	Q78QS6		Tnfrsf22
-0.255043	0.278982		Q7JJ13-2;Q7JJ13;I7HPW1;U3KLT0;G3UZR9	Bromodomain-containing protein 2	Brd2
-0.425517	2.46143	+	Q7M739		Tpr
-0.293237	1.06965		Q7TMK9;G3V018	Heterogeneous nuclear ribonucleoprotein Q	Syncrip	+	+
-1.56709	1.71775	+	Q7TMY4-2;Q7TMY4	THO complex subunit 7 homolog	Thoc7			+
-0.935013	3.79825	+	Q7TNC4-4;Q7TNC4;Q05CX5;Q7TNC4-2;Q7TNC4-3;E9Q715;E9PX54	Putative RNA-binding protein Luc7-like 2	Luc7l2			+
0.651663	2.8429	+	Q7TND5;A0A0G2JFR7;A0A0G2JEG7	Ribosome production factor 1	Rpf1
0.136515	0.151529		Q7TNS8	Uncharacterized protein C17orf96 homolog
0.955207	4.20827	+	Q7TNV0;D3YVJ6;E9Q8Y1	Protein DEK	Dek
-0.04488	0.211546		Q7TPV4	Myb-binding protein 1A	Mybbp1a
-0.358945	1.27565		Q7TQK4	Exosome complex component RRP40	Exosc3
0.610607	1.54688	+	Q7TSH3	Zinc finger protein 516	Znf516
-0.55516	0.61194		Q7TSY8	Shugoshin-like 2	Sgol2
-1.16792	0.517848		Q7TSZ8	Nucleus accumbens-associated protein 1	Nacc1
0.0619625	0.170524		Q7TT37	Elongator complex protein 1	Ikbkap
-0.0390425	0.0803888		Q80U70;E9PW15;F6Z494	Polycomb protein Suz12	Suz12
0.238407	1.16578		Q80U72;Q80U72-4;Q80U72-2;Q80U72-3;F6RIN9	Protein scribble homolog	Scrib
0.343793	0.505201		Q80U78-2;Q80U78-3;Q80U78;E9Q6M7;Q3TTW5;Q80U78-4	Pumilio homolog 1	Pum1
-0.845995	3.71455	+	Q80U93;A0A0A6YW83	Nuclear pore complex protein Nup214	Nup214
0.89505	3.09947	+	Q80UW8	DNA-directed RNA polymerases I, II, and III subunit RPABC1	Polr2e
-0.339487	0.404653		Q80UZ2-2;Q80UZ2	Protein SDA1 homolog	Sdad1
0.363297	1.22869		Q80VY9;A3QK59;K3W4M7;J3QNQ9	Putative ATP-dependent RNA helicase DHX33	Dhx33
-0.81027	3.4674	+	Q80W00;Q80W00-2;S4R164	Serine/threonine-protein phosphatase 1 regulatory subunit 10	Ppp1r10
0.233228	0.25294		Q80WC1-2;Q80WC1-3;Q80WC1;Q80WC1-4;F6TB64	Ubinuclein-2	Ubn2
0.0724925	0.369554		Q80WE4-3;Q80WE4-4;Q80WE4;Q80WE4-2	Kinesin-like protein KIF20B	Kif20b
0.419523	0.695791		Q80WQ8;Q80WQ8-3;Q80WQ8-2	Mis18-binding protein 1	Mis18bp1
-2.61123	1.14456		Q80WS3	rRNA/tRNA 2-O-methyltransferase fibrillarin-like protein 1	Fbll1
0.035475	0.0544549		Q80X32	UPF0461 protein C5orf24 homolog
-0.088335	0.256409		Q80X41-5;Q80X41-3;Q80X41;Q80X41-2	Serine/threonine-protein kinase VRK1	Vrk1
0.079655	0.3837		Q80X90	Filamin-B	Flnb
-0.587115	0.867939		Q80XB1;G3UY70;P59178;G3UX47;Q6P5G3-2;Q6P5G3	Lethal(3)malignant brain tumor-like protein 2	L3mbtl2
-0.04849	0.0812145		Q80XI4;F6RJE8;O70172	Phosphatidylinositol 5-phosphate 4-kinase type-2 beta;Phosphatidylinositol 5-phosphate 4-kinase type-2 alpha	Pip4k2b;Pip4k2a
-0.100187	0.350516		Q80XR6;Q20BD0;Q99020	Heterogeneous nuclear ribonucleoprotein A/B	Hnrnpab
-0.420145	2.07084	+	Q80Y32;Q8BTT5		Hmgxb4
-0.148592	0.929717		Q80Y44	Probable ATP-dependent RNA helicase DDX10	Ddx10
0.308642	0.830296		Q80Y84-2;Q80Y84;A0A087WR43;Q8BQM3;Q62240-3;Q62240-4;Q62240;P41230-2;P41230	Lysine-specific demethylase 5B	Kdm5b
-0.918303	2.64439	+	Q80YR5;F6XJ79;F6Z0Y5;F6WIZ2;F6VRR0;D6RHP9;F6R703;D6RJ78	Scaffold attachment factor B2	Safb2
2.21989	4.0013	+	Q80ZK9;A2AE98	WD and tetratricopeptide repeats protein 1	Wdtc1
-0.301795	0.31466		Q80ZM5		H1fx
0.442295	2.1058	+	Q810A7-2;Q810A7	ATP-dependent RNA helicase DDX42	Ddx42			+
0.2635	0.683781		Q810D6;F7CPC6;D6REU5	Glutamate-rich WD repeat-containing protein 1	Grwd1
0.540022	2.64136	+	Q810V0	U3 small nucleolar ribonucleoprotein protein MPP10	Mphosph10
-0.894373	1.14072		Q8BFQ4;A0A087WQ38	WD repeat-containing protein 82	Wdr82
1.10145	1.7626	+	Q8BFY9-2;Q8BFY9;Q3TKD0;J3QMX2	Transportin-1	Tnpo1
-0.0990725	0.386705		Q8BG15-6;Q8BG15-2;Q8BG15;Q8BG15-4;Q8BG15-3;Q8BG15-5	CTD small phosphatase-like protein 2	Ctdspl2
0.890293	2.26835	+	Q8BG32;G3UYI4;G3UYL3;G3UXL5;G3UYH2;G3UX67;G3UWV7;G3UYL8;G3UX15;G3UWW7;G3UZ33	26S proteasome non-ATPase regulatory subunit 11	Psmd11
-1.23343	1.83052	+	Q8BG79-2;Q8BG79	CWF19-like protein 2	Cwf19l2
-0.628313	2.42222	+	Q8BG81;Q3UDD3;F6VR84	Polymerase delta-interacting protein 3	Poldip3			+
0.0565175	0.168386		Q8BGA5;G3UZA0	KRR1 small subunit processome component homolog	Krr1
0.879785	1.26426		Q8BGA9	Mitochondrial inner membrane protein OXA1L	Oxa1l
-0.282102	0.449746		Q8BGD9	Eukaryotic translation initiation factor 4B	Eif4b
-0.06092	0.234986		Q8BGJ5;Q922I7;Q8CB58;P17225;E9QMW9;E9Q0W3;F7DCW4;E9Q279;F7AXP1;F7C521;B2RU80	Polypyrimidine tract-binding protein 1	Ptbp1
-0.159257	0.939639		Q8BGS0-2;Q8BGS0	Protein MAK16 homolog	Mak16
-0.848035	3.42772	+	Q8BGT7	Survival of motor neuron-related-splicing factor 30	Smndc1		+	+
0.221958	0.270149		Q8BGW5;Q8BGW5-2	SOSS complex subunit B2	Nabp1
-0.713187	2.69549	+	Q8BH74;E9Q4V9	Nuclear pore complex protein Nup107	Nup107
0.26364	1.25096		Q8BHB4	WD repeat-containing protein 3	Wdr3
-2.14852	2.05148	+	Q8BHG9	CGG triplet repeat-binding protein 1	Cggbp1
1.1549	2.05728	+	Q8BHL8	Proteasome inhibitor PI31 subunit	Psmf1
-1.09583	1.76225	+	Q8BHN5	RNA-binding protein 45	Rbm45
-0.489955	2.13996	+	Q8BHS3	Pre-mRNA-splicing factor RBM22	Rbm22	+	+
0.24629	1.37426	+	Q8BHX3;Q8BHX3-2;E9Q2C7;Q8BHX3-3	Borealin	Cdca8
-0.814523	2.53772	+	Q8BHY2	Nucleolar complex protein 4 homolog	Noc4l
-1.39201	3.55507	+	Q8BHZ4	Zinc finger protein 592	Znf592
-1.31585	1.82596	+	Q8BI72	CDKN2A-interacting protein	Cdkn2aip
-0.209888	0.454924		Q8BIG4	F-box only protein 28	Fbxo28
-2.23301	5.14873	+	Q8BIQ5-2;Q8BIQ5;A2AEK1;A2AEK3;F6ZKC7;A2AEJ8	Cleavage stimulation factor subunit 2	Cstf2
1.63966	2.73362	+	Q8BIW1	Protein prune homolog	Prune
-1.05055	1.34111	+	Q8BJ05;Q8BJ05-2;Q8BJ05-3;Q8BJ05-4	Zinc finger CCCH domain-containing protein 14	Zc3h14			+
-0.441412	2.68719	+	Q8BJ71;Q8BJ71-2	Nuclear pore complex protein Nup93	Nup93
0.64084	2.20887	+	Q8BJS4-3;Q8BJS4-2;Q8BJS4	SUN domain-containing protein 2	Sun2
0.163502	0.499081		Q8BJW5-2;Q8BJW5	Nucleolar protein 11	Nol11
2.37509	4.50747	+	Q8BJW6;Q8BJW6-2;D3YZZ6;D6RFN2;D6RGA6	Eukaryotic translation initiation factor 2A;Eukaryotic translation initiation factor 2A, N-terminally processed	Eif2a
-0.302345	0.90571		Q8BJZ0;D3YXX1;D3YY86;Q8R5C8;D3Z4G1;D3YXR0;D3YY85;D3Z7P1;D3Z2K4;D3Z029	Zinc finger MYND domain-containing protein 11	Zmynd11
-1.33338	4.7112	+	Q8BK35;A0A0G2JG28		Gltscr2
2.26778	3.78646	+	Q8BK58	HSPB1-associated protein 1	Hspbap1
1.13825	1.90221	+	Q8BK64	Activator of 90 kDa heat shock protein ATPase homolog 1	Ahsa1
0.227975	0.786572		Q8BK67;A2AWQ2	Protein RCC2	Rcc2
2.87798	4.9641	+	Q8BKC5;Q8BKC5-2	Importin-5	Ipo5
0.180935	0.918994		Q8BKS9	Pumilio domain-containing protein KIAA0020	Kiaa0020
-0.258918	1.02973		Q8BKT7;Q5SVF9;Q5SVF8	THO complex subunit 5 homolog	Thoc5			+
-0.36374	1.44714	+	Q8BKZ9;A2AWH8;A2AWH7	Pyruvate dehydrogenase protein X component, mitochondrial	Pdhx
-0.15534	0.813806		Q8BL97-4;Q8BL97-2;Q8BL97;Q8BL97-3	Serine/arginine-rich splicing factor 7	Srsf7
-0.18928	0.837146		Q8BMB0-2;Q8BMB0-3;Q8BMB0	Protein EMSY	Emsy
0.46019	1.97153	+	Q8BMC4	Nucleolar protein 9	Nop9
-0.328995	1.37136	+	Q8BMF4	Dihydrolipoyllysine-residue acetyltransferase component of pyruvate dehydrogenase complex, mitochondrial	Dlat
0.377607	0.35941		Q8BMJ2	Leucine--tRNA ligase, cytoplasmic	Lars
1.98465	3.43053	+	Q8BMK4	Cytoskeleton-associated protein 4	Ckap4
0.293563	1.23302		Q8BMS1	Trifunctional enzyme subunit alpha, mitochondrial;Long-chain enoyl-CoA hydratase;Long chain 3-hydroxyacyl-CoA dehydrogenase	Hadha
-0.888953	2.58066	+	Q8BP48;A0A0G2JFL1	Methionine aminopeptidase 1	Metap1
0.281253	0.279892		Q8BP67;F6RSK3	60S ribosomal protein L24	Rpl24;Gm17430
-0.417985	0.722415		Q8BP71-5;Q8BP71;Q8BP71-6;Q9JJ43-5;Q9JJ43-2;Q8BP71-7;Q9JJ43-4;Q8BP71-8;Q8BP71-3;Q9JJ43-6;Q9JJ43;Q9JJ43-3;Q8BP71-2;Q8BIF2-4;Q8BIF2-5;Q8BIF2-2;Q8BIF2;B7ZC11;A2A4W9;Q8BIF2-3;Q8BP71-4;Q9JJ43-7	RNA binding protein fox-1 homolog 2;RNA binding protein fox-1 homolog 1;RNA binding protein fox-1 homolog 3	Rbfox2;Rbfox1;Rbfox3
1.60261	4.13855	+	Q8BQM4	HEAT repeat-containing protein 3	Heatr3
0.228112	0.872893		Q8BRB7;Q8BRB7-2;Q14AW2;S4R2Q8	Histone acetyltransferase KAT6B	Kat6b
1.02136	2.69992	+	Q8BRF7-3;Q8BRF7;Q8BRF7-2	Sec1 family domain-containing protein 1	Scfd1
-0.911138	2.74373	+	Q8BRG8-2;Q8BRG8;Q8C214;F8WGT2;Q8BRG8-3	Transmembrane protein 209	Tmem209
1.23381	4.1626	+	Q8BT07;Q8BT07-2	Centrosomal protein of 55 kDa	Cep55
-0.679907	2.73346	+	Q8BTI8;Q8BTI8-2;Q8BTI8-3;A0A087WRX8;A0A087WPS9	Serine/arginine repetitive matrix protein 2	Srrm2	+	+	+
-0.0063875	0.0213176		Q8BTS0;Q61656;S4R1I6;B1ARC0;B1ARB9;S4R1E3	Probable ATP-dependent RNA helicase DDX5	Ddx5	+	+
-0.93171	1.33852	+	Q8BTT6;A0A0A6YWS6;A0A0A6YXM9	Digestive organ expansion factor homolog	Diexf
-0.507323	1.4834	+	Q8BTU1;Q8BTU1-2	Cilia- and flagella-associated protein 20	Cfap20
-1.17987	1.244		Q8BTV2-2;Q8BTV2;Q8BTV2-3	Cleavage and polyadenylation specificity factor subunit 7	Cpsf7
-0.7184	3.4541	+	Q8BTW3	Exosome complex component MTR3	Exosc6
0.16671	0.587539		Q8BU03	Periodic tryptophan protein 2 homolog	Pwp2
0.187685	0.346363		Q8BU30	Isoleucine--tRNA ligase, cytoplasmic	Iars
-0.35333	1.49347	+	Q8BUI3;H9KV12	Leucine-rich repeat and WD repeat-containing protein 1	LRWD1
1.25434	1.62631	+	Q8BUN5;F7BUP2;A2CG44;E9Q5P9;E9Q3M0;Q9JIW5;Q62432-2;Q62432	Mothers against decapentaplegic homolog 3;Mothers against decapentaplegic homolog 9;Mothers against decapentaplegic homolog 2	Smad3;Smad2;Smad9
-0.0987	0.0761429		Q8BV66	Interferon-induced protein 44	Ifi44
0.619823	2.83318	+	Q8BVY0		Rsl1d1
1.4864	4.7112	+	Q8BW10;E9PW56;F6YBB8	RNA-binding protein NOB1	Nob1
1.22735	1.71868	+	Q8BWY3	Eukaryotic peptide chain release factor subunit 1	Etf1
-0.47601	1.5731	+	Q8BX09;A0A087WST2;Q8BX09-2;A0A087WRV7;A0A087WQU2	Retinoblastoma-binding protein 5	Rbbp5
-0.22497	1.03925		Q8BX10-2;Q8BX10;A0A0G2JG95;F6YJC6	Serine/threonine-protein phosphatase PGAM5, mitochondrial	Pgam5
-0.309862	0.871147		Q8BX20;Q3UTA4;Q3UT53;Q3TQZ4;M0QWL1;J3QQ02;J3QPI8;J3QP87;J3QNT6;J3QMW5;D3Z367;J3QPQ5;F6YNI8;Q8BMJ3;Q60872	Eukaryotic translation initiation factor 1A, X-chromosomal;Eukaryotic translation initiation factor 1A	Gm5662;Gm8300;BB287469;Gm2016;Gm21936;Gm2056;Gm6803;Gm2035;Gm5039;Gm2075;Gm2046;Gm10264;Gm21319;Eif1ax;Eif1a
-0.24385	1.37999	+	Q8BX22;Q8BX22-2;A2AUZ7;Q8BX22-3;Q62255-2;Q62255	Sal-like protein 4	Sall4
0.168098	0.576659		Q8BY02	NF-kappa-B-repressing factor	Nkrf
1.24887	3.51268	+	Q8BZA9	Fructose-2,6-bisphosphatase TIGAR	Tigar
-1.33569	3.23598	+	Q8BZN7;Q569Z6;F7AB07	Thyroid hormone receptor-associated protein 3	Thrap3
-0.98663	2.4308	+	Q8BZR9;Q8BZR9-2;Q8BZR9-3	Uncharacterized protein C17orf85 homolog
0.9982	2.03892	+	Q8C052	Microtubule-associated protein 1S;MAP1S heavy chain;MAP1S light chain	Map1s
1.00893	3.09044	+	Q8C1A5	Thimet oligopeptidase	Thop1
1.19206	2.87925	+	Q8C1D8;Q8C1D8-2	Protein IWS1 homolog	Iws1
-0.892455	2.60196	+	Q8C2Q3;E9QL13;Q8C2Q3-2;J3QN51;J3QPT3	RNA-binding protein 14	Rbm14
-0.459413	2.19847	+	Q8C2Q7;O35737	Heterogeneous nuclear ribonucleoprotein H;Heterogeneous nuclear ribonucleoprotein H, N-terminally processed	Hnrnph1	+	+
0.15836	0.443399		Q8C2Q8;Q91VR2;A2AKU9;A2AKV1;A2AKV2;A2AKV3;A2AKV0	ATP synthase subunit gamma;ATP synthase subunit gamma, mitochondrial	Atp5c1
0.61263	2.59927	+	Q8C4J7;F6YAR3	Transducin beta-like protein 3	Tbl3
0.945425	1.11531		Q8C4M7-2;Q8C4M7	Centromere protein U	Cenpu
1.33068	2.77527	+	Q8C4Y1;B2RS19;P28574	Protein max	Max
-1.17959	4.13855	+	Q8C570;A2ASC6	mRNA export factor	Rae1
1.70705	4.28946	+	Q8C605;Q9WUA3;Q9WUA3-2;F6YL81	6-phosphofructokinase;ATP-dependent 6-phosphofructokinase, platelet type	Pfkp
0.450515	1.35665	+	Q8C6B9	Active regulator of SIRT1	Rps19bp1
1.08147	2.66818	+	Q8C6P8-2;Q8C6P8;H3BL53;G3UYC1;G3UY05;G3UYK1	Zinc finger protein 57	Zfp57
-0.457045	2.49509	+	Q8C796;D3YUX3	REST corepressor 2	Rcor2
0.653245	2.58064	+	Q8C7V3;REV__Q8C7V3	U3 small nucleolar RNA-associated protein 15 homolog	Utp15
0.252543	1.3107	+	Q8C854-3;Q8C854;G8JL68	Myelin expression factor 2	Myef2
-0.189573	0.764807		Q8C9B9;Q8C9B9-3;Q8C9B9-2	Death-inducer obliterator 1	Dido1
1.71656	4.64437	+	Q8CAQ8-2;Q8CAQ8;Q8CAQ8-5;E9QAY6;E9Q800;Q8CAQ8-3;Q3TZK4;E9PVS5;Q8CAQ8-4	MICOS complex subunit Mic60	Immt
0.59869	2.18759	+	Q8CCF0-2;Q8CCF0-3;Q8CCF0;Q8CCF0-5;Q8CCF0-4	U4/U6 small nuclear ribonucleoprotein Prp31	Prpf31		+	+
0.460292	2.0724	+	Q8CCG4;E9PUG8	Developmental pluripotency-associated protein 4	Dppa4
0.463133	1.76691	+	Q8CCI5	RING1 and YY1-binding protein	Rybp
-0.36541	1.56701	+	Q8CCK0	Core histone macro-H2A.2	H2afy2
-1.13363	2.52233	+	Q8CDD9;G5E8M8;G3X9P5;Q8CDD9-2	Ligand-dependent nuclear receptor-interacting factor 1	Lrif1
-0.695965	0.584714		Q8CDN6	Thioredoxin-like protein 1	Txnl1
-1.19274	4.29478	+	Q8CEC0-3;Q8CEC0-2;Q8CEC0	Nuclear pore complex protein Nup88	Nup88
1.09185	3.39435	+	Q8CFI2;A0A087WP01;Q6ZWZ2	Ubiquitin-conjugating enzyme E2 R1	Cdc34
0.350787	1.39869	+	Q8CFI7	DNA-directed RNA polymerase II subunit RPB2	Polr2b
-1.39359	2.77967	+	Q8CFZ0;G3UYP0;P63280;G3UWL6;G3UWJ1	SUMO-conjugating enzyme UBC9	Ube2i
-0.252893	1.35406	+	Q8CG46-2;Q8CG46	Structural maintenance of chromosomes protein 5	Smc5
0.709725	3.457	+	Q8CG48;B1AWH6	Structural maintenance of chromosomes protein 2	Smc2
-0.030925	0.0798042		Q8CGC6;F6SB18	RNA-binding protein 28	Rbm28		+
0.826052	2.77117	+	Q8CGC7	Bifunctional glutamate/proline--tRNA ligase;Glutamate--tRNA ligase;Proline--tRNA ligase	Eprs
-0.37028	1.23656		Q8CGF7-2;Q8CGF7;Q8CGF7-3	Transcription elongation regulator 1	Tcerg1
0.119553	0.409548		Q8CGK3	Lon protease homolog, mitochondrial	Lonp1
1.83081	0.776664		Q8CGP1	Histone H2B type 1-K	Hist1h2bk
0.652018	2.35889	+	Q8CGP6;Q8CGP5;Q8BFU2;P22752;Q8CGP7;Q8R1M2;Q8CGP4	Histone H2A type 1-H;Histone H2A type 1-F;Histone H2A type 3;Histone H2A type 1;Histone H2A type 1-K;Histone H2A.J;Histone H2A	Hist1h2ah;Hist1h2af;Hist3h2a;Hist1h2ab;Hist1h2ak;H2afj;Hist1h2aa
-0.0937825	0.274037		Q8CGY8;Q8CGY8-2	UDP-N-acetylglucosamine--peptide N-acetylglucosaminyltransferase 110 kDa subunit	Ogt
-0.595315	0.929717		Q8CH09	SURP and G-patch domain-containing protein 2	Sugp2
0.290832	1.16186		Q8CH18-3;Q8CH18;Q8CH18-2	Cell division cycle and apoptosis regulator protein 1	Ccar1
-2.21438	4.74102	+	Q8CH25-2;Q8CH25	SAFB-like transcription modulator	Sltm
-0.538647	1.21392		Q8CHC8	ADNP homeobox protein 2	Adnp2
-0.671895	3.03801	+	Q8CHI8-5;Q8CHI8-3;Q8CHI8-2;Q8CHI8-4;Q8CHI8	E1A-binding protein p400	Ep400			+
-0.132765	0.502357		Q8CHY6	Transcriptional repressor p66 alpha	Gatad2a			+
-0.393973	1.7677	+	Q8CI11;Q8CI11-2	Guanine nucleotide-binding protein-like 3	Gnl3
0.824457	2.21243	+	Q8CI12;Q5F247	Smoothelin-like protein 2	Smtnl2
1.53672	2.94859	+	Q8CIB5;A6X941;A6X940	Fermitin family homolog 2	Fermt2
-0.673695	0.402365		Q8CIL4	Uncharacterized protein C1orf131 homolog
1.15748	3.74086	+	Q8CIN4;Q61036-2;Q61036;A3KGC3;A3KGC4;A3KGC5	Serine/threonine-protein kinase PAK 2;PAK-2p27;PAK-2p34;Serine/threonine-protein kinase PAK 3	Pak2;Pak3
1.42998	1.77907	+	Q8CJ40-2;Q8CJ40-3;Q8CJ40	Rootletin	Crocc
0.132032	0.790121		Q8CJF7;F6SJR1;F6S6E4;F6QTR3	Protein ELYS	Ahctf1
-0.82715	2.05683	+	Q8JZM7	Parafibromin	Cdc73
0.248542	0.945015		Q8JZU2;F6VVY4		Slc25a1
-1.26975	3.95303	+	Q8JZX4;A2AP40	Splicing factor 45	Rbm17		+
0.771598	2.31474	+	Q8K1A6;E9PX94	Coiled-coil and C2 domain-containing protein 1A	Cc2d1a
0.151608	0.382403		Q8K1K3;Q9QXG9	TERF1-interacting nuclear factor 2	Tinf2
-0.400332	2.10395	+	Q8K224;A2BH46;E9Q498	N-acetyltransferase 10	Nat10
-0.445445	0.948591		Q8K284-2;Q8K284	General transcription factor 3C polypeptide 1	Gtf3c1
0.799133	1.55216	+	Q8K297	Procollagen galactosyltransferase 1	Colgalt1
0.001985	0.00657577		Q8K298	Actin-binding protein anillin	Anln
0.247695	0.450233		Q8K2B3	Succinate dehydrogenase [ubiquinone] flavoprotein subunit, mitochondrial	Sdha
0.02217	0.0691926		Q8K2F0;A2AKA9;Q8K2F0-2;A2AKB0;S4R1Z1	Bromodomain-containing protein 3	Brd3
-2.12252	5.01316	+	Q8K2H1;G3X959;Q8K2H1-2;G3UWD4;Q3UBL8	Periphilin-1	Pphln1
-0.444005	1.76296	+	Q8K2T8	RNA polymerase II-associated factor 1 homolog	Paf1
2.36539	3.43902	+	Q8K2Z4;Q8K2Z4-2;A0A087WRK6;A0A087WNQ1	Condensin complex subunit 1	Ncapd2
0.323188	1.20909		Q8K301	Probable ATP-dependent RNA helicase DDX52	Ddx52
-0.71927	3.76089	+	Q8K310;A0A087WSU2;A0A087WSP7;A0A087WQZ1;A0A087WQD6;A0A087WQ54;A0A087WQP4;A0A087WPQ5	Matrin-3	Matr3
-1.35462	4.65644	+	Q8K327	Chromosome alignment-maintaining phosphoprotein 1	Champ1
-0.0332325	0.142196		Q8K363;F6ZX28	ATP-dependent RNA helicase DDX18	Ddx18
1.04357	1.40614	+	Q8K389	CDK5 regulatory subunit-associated protein 2	Cdk5rap2
0.907147	0.935971		Q8K3F7;F7AJL7;F6Y7H0;F6X7T7	L-threonine 3-dehydrogenase, mitochondrial	Tdh
-0.458085	1.2039		Q8K3G5	Inactive serine/threonine-protein kinase VRK3	Vrk3
1.32854	2.63328	+	Q8K3H0	DCC-interacting protein 13-alpha	Appl1
-0.692072	2.58064	+	Q8K3X4	Interferon regulatory factor 2-binding protein-like	Irf2bpl
-0.020765	0.0188699		Q8K3Y3;H3BLC6;H3BL11;H3BK51	Protein lin-28 homolog A	Lin28a
-1.08258	4.55643	+	Q8K3Z9;H7BX32	Nuclear envelope pore membrane protein POM 121	Pom121
-0.53722	2.83318	+	Q8K4L0	ATP-dependent RNA helicase DDX54	Ddx54
-1.42002	4.59045	+	Q8K4P0;D3YX80	pre-mRNA 3 end processing protein WDR33	Wdr33
-0.220922	1.18178		Q8K4Z5	Splicing factor 3A subunit 1	Sf3a1	+	+
-0.25794	0.845143		Q8QZV7;F6W761;F7BP94	Protein asunder homolog	Asun
0.672637	1.80766	+	Q8QZY1	Eukaryotic translation initiation factor 3 subunit L	Eif3l
0.249347	0.704734		Q8R050-2;Q8R050;Q149F3	Eukaryotic peptide chain release factor GTP-binding subunit ERF3A	Gspt1
-0.43037	2.23085	+	Q8R080	G2 and S phase-expressed protein 1	Gtse1
-0.177398	0.362408		Q8R0A2-2;Q8R0A2	Zinc finger and BTB domain-containing protein 44	Zbtb44
-0.49884	0.716976		Q8R0F5	RNA-binding motif protein, X-linked 2	Rbmx2
-0.173645	1.00441		Q8R0G9	Nuclear pore complex protein Nup133	Nup133
-0.0495925	0.128519		Q8R0K4;H3BLI5	Coiled-coil domain-containing protein 137	Ccdc137
0.11183	0.130012		Q8R0L9-2;Q8R0L9;Q8R0L9-3	Transcriptional adapter 3	Tada3
-0.022605	0.0095458		Q8R0W0	Epiplakin	Eppk1
-1.70214	3.80102	+	Q8R149-2;Q8R149	BUD13 homolog	Bud13
2.28139	4.82572	+	Q8R1B4	Eukaryotic translation initiation factor 3 subunit C	Eif3c
0.391985	0.360574		Q8R1K1	Ubiquitin-associated domain-containing protein 2	Ubac2
0.426077	2.81838	+	Q8R2M2	Deoxynucleotidyltransferase terminal-interacting protein 2	Dnttip2
0.29154	1.41686	+	Q8R2N2	Cirhin	Cirh1a
1.38167	2.99469	+	Q8R2P8;Q99MN1	Lysine--tRNA ligase	Kars
0.352195	1.09409		Q8R2S9	Actin-related protein 8	Actr8
-0.151388	0.260524		Q8R2T8-2;Q8R2T8;H3BJX5	General transcription factor 3C polypeptide 5	Gtf3c5
-0.622372	3.03318	+	Q8R2U0-2;Q8R2U0	Nucleoporin SEH1	Seh1l
-0.606193	1.62631	+	Q8R2U2;D6RFS8;F6RAK6		BC027231
0.247197	0.1375		Q8R322	Nucleoporin GLE1	Gle1
-0.295175	1.08739		Q8R323	Replication factor C subunit 3	Rfc3
0.186095	1.082		Q8R326-2;Q8R326;F7D909	Paraspeckle component 1	Pspc1			+
-0.205967	0.843647		Q8R3C6;Q8R3C6-2	Probable RNA-binding protein 19	Rbm19
-0.214915	1.23302		Q8R3N1	Nucleolar protein 14	Nop14
0.246592	0.499081		Q8R3N6	THO complex subunit 1	Thoc1			+
0.144677	0.175942		Q8R3Y8-2;Q8R3Y8	Interferon regulatory factor 2-binding protein 1	Irf2bp1
-1.02768	2.7427	+	Q8R480;Z4YLV0;Z4YM95	Nuclear pore complex protein Nup85	Nup85
-0.270487	0.297868		Q8R4U7;F6XG76	Leucine zipper protein 1	Luzp1
0.126403	0.639549		Q8R5K4-2;Q8R5K4	Nucleolar protein 6	Nol6
-0.209643	0.815954		Q8VBV3;A2AV19;A0A0A6YW57	Exosome complex component RRP4	Exosc2
1.20811	1.83099	+	Q8VBV7;A0A087WPM5	COP9 signalosome complex subunit 8	Cops8
0.06816	0.127871		Q8VBW5-2;Q8VBW5-3;Q8VBW5;B8JK50;Q8VBW5-4	HMG box transcription factor BBX	Bbx
-0.769625	2.98948	+	Q8VCB1;J3QPB5	Nucleoporin NDC1	Ndc1
0.212585	0.762072		Q8VCD5	Mediator of RNA polymerase II transcription subunit 17	Med17
0.636463	3.136	+	Q8VCG3	WD repeat-containing protein 74	Wdr74
0.286428	1.43776	+	Q8VCY6	U3 small nucleolar RNA-associated protein 6 homolog	Utp6
-0.227348	1.50361	+	Q8VDD5;F2Z494	Myosin-9	Myh9
0.687327	2.15757	+	Q8VDF2;Q8VDF2-2;E9Q5Y5	E3 ubiquitin-protein ligase UHRF1	Uhrf1
-0.07502	0.138522		Q8VDG3	Poly(A)-specific ribonuclease PARN	Parn
1.07209	3.74909	+	Q8VDM4;J3KMQ2	26S proteasome non-ATPase regulatory subunit 2	Psmd2;Gm5422
-0.381015	0.977577		Q8VDM6-2;Q8VDM6;Q8VDM6-3	Heterogeneous nuclear ribonucleoprotein U-like protein 1	Hnrnpul1
-0.0058625	0.0148897		Q8VDP4	Cell cycle and apoptosis regulator protein 2	Ccar2		+
-0.136217	0.158547		Q8VDS4	Regulation of nuclear pre-mRNA domain-containing protein 1A	Rprd1a
1.10531	4.28946	+	Q8VDW0;Q8VDW0-2;D6RHT5	ATP-dependent RNA helicase DDX39A	Ddx39a		+
1.3858	1.43679	+	Q8VE10;Q8VE10-2	N-alpha-acetyltransferase 40	Naa40
-0.03779	0.0994529		Q8VE80	THO complex subunit 3	Thoc3			+
-0.136662	0.352265		Q8VEJ4;F6QAD9	Notchless protein homolog 1	Nle1
-0.74817	2.14967	+	Q8VHM5;F7B5B5;A2AW41;S4R1E9;V9GWW3;A2AW40		Hnrnpr	+	+
0.0970725	0.403633		Q8VHR5;A1L3S7;Q8VHR5-2	Transcriptional repressor p66-beta	Gatad2b			+
0.543425	2.61879	+	Q8VHZ7;F6VY64;D6RCI8	U3 small nucleolar ribonucleoprotein protein IMP4	Imp4
-0.45903	1.95568	+	Q8VI33;A0A087WR08;A0A087WQ57;A0A087WNM2;A2AP82;Q6NZA9;A2AP81	Transcription initiation factor TFIID subunit 9;Transcription initiation factor TFIID subunit 9B	Taf9;Taf9b
-0.335807	1.5643	+	Q8VI84	Nucleolar complex protein 3 homolog	Noc3l			+
0.89356	3.58393	+	Q8VIJ6	Splicing factor, proline- and glutamine-rich	Sfpq
0.336315	1.20909		Q91V55;P97461;D3YYM6	40S ribosomal protein S5;40S ribosomal protein S5, N-terminally processed	Rps5
0.166382	0.512646		Q91VA7;V9GXV0		Idh3b
-0.215875	0.901261		Q91VC3;E9PV04;A2AFK7;D6RJ60;D6RJ11	Eukaryotic initiation factor 4A-III;Eukaryotic initiation factor 4A-III, N-terminally processed	Eif4a3;Gm8994	+	+	+
0.219325	1.3241	+	Q91VE6-2;Q91VE6;E0CXU3	MKI67 FHA domain-interacting nucleolar phosphoprotein	Nifk
-0.362035	1.53665	+	Q91VL8	Telomeric repeat-binding factor 2-interacting protein 1	Terf2ip
-0.707912	3.52369	+	Q91VM5	RNA binding motif protein, X-linked-like-1	Rbmxl1	+	+
-0.163915	0.57853		Q91VN6	Probable ATP-dependent RNA helicase DDX41	Ddx41	+	+
0.202918	1.13624		Q91VR5	ATP-dependent RNA helicase DDX1	Ddx1
1.13598	0.958575		Q91VT1;Q91VT1-2	E3 SUMO-protein ligase NSE2	Nsmce2
0.938	1.4342	+	Q91VY9	Zinc finger protein 622	Znf622
-0.42957	0.931357		Q91W01;O35621	Phosphomannomutase;Phosphomannomutase 1	Pmm1
-0.50802	2.02685	+	Q91W39;B7ZC23	Nuclear receptor coactivator 5	Ncoa5
1.22483	3.14884	+	Q91WG4;Q91WG4-2	Elongator complex protein 2	Elp2
1.58517	1.30841	+	Q91WK2	Eukaryotic translation initiation factor 3 subunit H	Eif3h
0.606733	0.655845		Q91WM1;Q91WM1-2	Spermatid perinuclear RNA-binding protein	Strbp
0.245425	0.857406		Q91WM3	U3 small nucleolar RNA-interacting protein 2	Rrp9
0.97665	2.29171	+	Q91WN1	DnaJ homolog subfamily C member 9	Dnajc9
-0.35196	0.777007		Q91YE7-2;Q91YE7;S4R273;S4R1N4;S4R1V5;S4R184;A0A0A6YX44;S4R1U7	RNA-binding protein 5	Rbm5		+
-0.806582	2.76051	+	Q91YK2;F7AGW8	Ribosomal RNA processing protein 1 homolog B	Rrp1b
0.29323	1.64523	+	Q91YQ5	Dolichyl-diphosphooligosaccharide--protein glycosyltransferase subunit 1	Rpn1
-0.229073	0.434066		Q91YR7;Q91YR7-2	Pre-mRNA-processing factor 6	Prpf6	+	+	+
1.01423	3.03354	+	Q91YT7;E9PW90	YTH domain-containing family protein 2	Ythdf2
-0.0727825	0.168648		Q91YU8	Suppressor of SWI4 1 homolog	Ppan
0.058205	0.103713		Q91YZ2;P56546;P56546-2;E9Q0T4;E9PWQ9	C-terminal-binding protein 2	Ctbp2
0.484077	2.17676	+	Q91YZ8;A3KFU5;A3KFU8;Q6PHQ9;D3Z5M2;V9GXG3;A0A0A6YWT2;G5E8X2		Pabpc4;Gm10110
0.283587	0.912923		Q91Z25;Q9WV32;F6THG2	Actin-related protein 2/3 complex subunit 1B	Arpc1b
-1.25306	1.00671		Q91Z49-2;Q91Z49;D3Z591;Q91Z49-3	UAP56-interacting factor	Fyttd1			+
0.953013	3.73064	+	Q91Z50;P39749	Flap endonuclease 1	Fen1
0.342583	2.27747	+	Q91ZW3;Q6PGB8;Q6PGB8-2;F6Z6F4;Q8BS67	SWI/SNF-related matrix-associated actin-dependent regulator of chromatin subfamily A member 5	Smarca5
-0.568982	0.720659		Q920A7-2;Q920A7	AFG3-like protein 1	Afg3l1
0.530775	2.10536	+	Q920F6;Q6WIZ7	Structural maintenance of chromosomes protein 1B	Smc1b
-0.373327	2.44425	+	Q921E6-2;Q921E6;Q921E6-3	Polycomb protein EED	Eed
-0.520807	1.81264	+	Q921F2;A0A087WR97;A0A087WRZ5;Q8R0B4;Q8BLD4;Q6VYI5;Q6VYI4;A0A087WSE4;A0A087WQA5;A0A087WRP4;H3BJV1;A0A087WSH7;A0A087WS74;A0A087WQX8;A0A087WNY6;A0A087WSC6	TAR DNA-binding protein 43	Tardbp
-0.324082	1.34534	+	Q921F4;V9GXB6;Q921F4-4	Heterogeneous nuclear ribonucleoprotein L-like	Hnrnpll
0.427755	1.30091		Q921G8	Gamma-tubulin complex component 2	Tubgcp2
-0.24871	0.640114		Q921I9	Exosome complex component RRP41	Exosc4
0.386008	1.84624	+	Q921K2;P11103;P11103-2;A0A0A6YX03;A0A0A6YY63;A0A0A6YVX0	Poly [ADP-ribose] polymerase 1	Parp1
-1.56089	2.22062	+	Q921L6;Q60598	Src substrate cortactin	Cttn
-0.23101	0.999607		Q921M3;Q921M3-2	Splicing factor 3B subunit 3	Sf3b3	+	+
-0.05935	0.237845		Q921N6;Q921N6-2;H3BLJ6	Probable ATP-dependent RNA helicase DDX27	Ddx27
0.153418	0.851763		Q921Y2	U3 small nucleolar ribonucleoprotein protein IMP3	Imp3
0.935527	2.83318	+	Q922B2;Q8BJY7	Aspartate--tRNA ligase, cytoplasmic	Dars
0.670798	2.57945	+	Q922D8	C-1-tetrahydrofolate synthase, cytoplasmic;Methylenetetrahydrofolate dehydrogenase;Methenyltetrahydrofolate cyclohydrolase;Formyltetrahydrofolate synthetase;C-1-tetrahydrofolate synthase, cytoplasmic, N-terminally processed	Mthfd1
-0.412225	1.21539		Q922M5;H3BJN2;H3BJV7	Cell division cycle-associated 7-like protein	Cdca7l
0.557057	1.86315	+	Q922Q4;A2ABZ2;Q922W5	Pyrroline-5-carboxylate reductase 2	Pycr2
0.55561	2.85547	+	Q922Q8	Leucine-rich repeat-containing protein 59	Lrrc59
-0.0819175	0.251067		Q922S8;Q3TTL2;A2AE72;Q8C0N1	Kinesin-like protein KIF2C	Kif2c
-0.836745	2.98812	+	Q922U1;E0CYD0	U4/U6 small nuclear ribonucleoprotein Prp3	Prpf3		+	+
1.00096	1.20909		Q922Y1	UBX domain-containing protein 1	Ubxn1
-0.353938	1.18917		Q923D4	Splicing factor 3B subunit 5	Sf3b5		+
-0.22007	0.918712		Q923D5	WW domain-binding protein 11	Wbp11			+
1.2745	1.63235	+	Q923G2	DNA-directed RNA polymerases I, II, and III subunit RPABC3	Polr2h
0.940307	2.57135	+	Q924C1;Q924C1-2;Q924C1-3	Exportin-5	Xpo5
-0.232665	1.22007		Q924W5;Q924W5-2	Structural maintenance of chromosomes protein 6	Smc6
0.546347	1.87237	+	Q925I1;Q925I1-2;H3BKI6;H3BK90;V9GWS5	ATPase family AAA domain-containing protein 3	Atad3
-0.30555	1.65922	+	Q99JF8;A2BI12;Q99JF8-2;F6RB63;F6W677	PC4 and SFRS1-interacting protein	Psip1
-0.327178	0.547045		Q99JH1	Ribonuclease P protein subunit p25-like protein	Rpp25l
-0.009185	0.0148897		Q99JI4	26S proteasome non-ATPase regulatory subunit 6	Psmd6
0.0487775	0.0862241		Q99JR8-2;Q99JR8;G3UXC0	SWI/SNF-related matrix-associated actin-dependent regulator of chromatin subfamily D member 2	Smarcd2
-0.65273	2.58064	+	Q99JX7;V9GXF3;V9GXW3;V9GX96;V9GXC8;V9GXM5	Nuclear RNA export factor 1	Nxf1			+
0.19715	0.502357		Q99JY0;D3YXU1	Trifunctional enzyme subunit beta, mitochondrial;3-ketoacyl-CoA thiolase	Hadhb
-0.0606375	0.127574		Q99JY9;A0A087WRA1;A0A087WS98;A0A087WP86;A0A087WQ14;Q641P0-2;Q641P0	Actin-related protein 3	Actr3
1.71508	3.27204	+	Q99K01;Q99K01-2;Q99K01-3;Q99K01-4;D3YZA7;Q99K01-5	Pyridoxal-dependent decarboxylase domain-containing protein 1	Pdxdc1
1.19875	3.9867	+	Q99K48;Q99K48-2;B1AXT0	Non-POU domain-containing octamer-binding protein	Nono			+
1.14096	2.05174	+	Q99KD5;D3YZN8;D6RIN1	Protein unc-45 homolog A	Unc45a
-1.14396	3.26819	+	Q99KG3-2;Q99KG3-3;Q99KG3	RNA-binding protein 10	Rbm10
1.02842	1.6254	+	Q99KH8;D3Z359;Q9Z2W1;A2AD84;Q99JT2	Serine/threonine-protein kinase 24;Serine/threonine-protein kinase 24 35 kDa subunit;Serine/threonine-protein kinase 24 12 kDa subunit;Serine/threonine-protein kinase 25;Serine/threonine-protein kinase MST4	Stk24;Stk25;2610018G03Rik;Mst4
0.179155	0.703521		Q99KI0	Aconitate hydratase, mitochondrial	Aco2
-0.40848	0.792063		Q99KK2	N-acylneuraminate cytidylyltransferase	Cmas
-0.359025	1.64523	+	Q99KP6-3;Q99KP6;Q99KP6-2	Pre-mRNA-processing factor 19	Prpf19	+	+	+
1.20387	2.62775	+	Q99KQ4	Nicotinamide phosphoribosyltransferase	Nampt
0.999455	1.9221	+	Q99KV1	DnaJ homolog subfamily B member 11	Dnajb11
-1.29416	3.24154	+	Q99KX1	Myeloid leukemia factor 2	Mlf2
0.80324	3.23031	+	Q99L45;E0CXJ3	Eukaryotic translation initiation factor 2 subunit 2	Eif2s2
-0.887193	2.40264	+	Q99LB0;A2A4Y7;F7B2G8	Deoxynucleotidyltransferase terminal-interacting protein 1	Dnttip1
0.381295	0.182049		Q99LC2	Cleavage stimulation factor subunit 1	Cstf1
-1.74028	3.06893	+	Q99LC5	Electron transfer flavoprotein subunit alpha, mitochondrial	Etfa
0.76934	1.99814	+	Q99LE6	ATP-binding cassette sub-family F member 2	Abcf2
-0.403635	2.14739	+	Q99LF4	tRNA-splicing ligase RtcB homolog	Rtcb
1.92998	2.81819	+	Q99LG2;E9PV58	Transportin-2	Tnpo2
0.444568	2.59623	+	Q99LH1;B1ASC2	Nucleolar GTP-binding protein 2	Gnl2
-0.02069	0.0355711		Q99LI5	Zinc finger protein 281	Znf281
-0.792695	2.71892	+	Q99LI7	Cleavage stimulation factor subunit 3	Cstf3
1.68466	2.16267	+	Q99LL5;E9QAL6	Periodic tryptophan protein 1 homolog	Pwp1
-0.24132	0.653126		Q99LT0	Protein dpy-30 homolog	Dpy30
-0.74821	0.614051		Q99LX5	Multiple myeloma tumor-associated protein 2 homolog	Mmtag2
1.73452	4.60513	+	Q99LZ3	DNA replication complex GINS protein SLD5;DNA replication complex GINS protein SLD5, N-terminally processed	Gins4
0.143937	0.386914		Q99M28;J3QK23;Q99M28-2	RNA-binding protein with serine-rich domain 1	Rnps1;Gm9825			+
0.172442	0.994656		Q99M46;P97760	DNA-directed RNA polymerase II subunit RPB3	Polr2c
0.316777	1.46852	+	Q99M87-3;Q99M87;Q99M87-2	DnaJ homolog subfamily A member 3, mitochondrial	Dnaja3
0.078155	0.418862		Q99ME9	Nucleolar GTP-binding protein 1	Gtpbp4
-1.0011	3.13926	+	Q99MJ9	ATP-dependent RNA helicase DDX50	Ddx50
0.176652	0.321229		Q99MR6-3;Q99MR6-4;Q99MR6-2;Q99MR6;A0A0G2JDF8;A0A0G2JG65;A0A0G2JDN3	Serrate RNA effector molecule homolog	Srrt
0.09349	0.16136		Q99MU3-5;Q99MU3-2;Q99MU3;Q99MU3-3;Q99MU3-4	Double-stranded RNA-specific adenosine deaminase	Adar
0.588847	1.26426		Q99NA9	Polycomb group RING finger protein 6	Pcgf6
-0.54666	1.93582	+	Q99P88	Nuclear pore complex protein Nup155	Nup155
0.241495	0.998675		Q99PU8-2;A0A0G2JGL8;Q99PU8;Q99PU8-3;A0A0G2JGY7;A0A0G2JE53;A0A0G2JEN9;A0A0G2JGU3;A0A0G2JGD9;A0A0G2JGL1	Putative ATP-dependent RNA helicase DHX30	Dhx30
-0.32307	2.04846	+	Q99PV0;B7ZC27	Pre-mRNA-processing-splicing factor 8	Prpf8	+	+	+
0.57695	2.34275	+	Q9CPN8	Insulin-like growth factor 2 mRNA-binding protein 3	Igf2bp3
0.939445	1.1597		Q9CPQ3	Mitochondrial import receptor subunit TOM22 homolog	Tomm22
1.1316	2.49117	+	Q9CPQ5	Centromere protein Q	Cenpq
1.334	3.21865	+	Q9CPR5;A0A0A6YVP4;Q9CPR5-2	39S ribosomal protein L15, mitochondrial	Mrpl15
0.084845	0.253538		Q9CPR8;Q99PB1	Melanoma-associated antigen G1	Ndnl2
0.761345	2.54037	+	Q9CPS7	RNA-binding protein PNO1	Pno1
0.55701	2.05762	+	Q9CPT5;D3Z7M5;D6RDE0	Nucleolar protein 16	Nop16
0.21719	0.55303		Q9CPY3;Q9CPY3-2	Sororin	Cdca5
-0.273952	0.369554		Q9CQ43;Q8VCG1		Dut
0.197573	0.690762		Q9CQ69;I7HPX6	Cytochrome b-c1 complex subunit 8	Uqcrq
0.11169	0.278763		Q9CQ71	Replication protein A 14 kDa subunit	Rpa3
-0.83842	4.07974	+	Q9CQ73;E0CXK9;E0CX59		Pkp2
0.0297625	0.041184		Q9CQA5-2;Q9CQA5	Mediator of RNA polymerase II transcription subunit 4	Med4
-0.08847	0.343863		Q9CQE8	UPF0568 protein C14orf166 homolog
0.0662275	0.0899426		Q9CQF0	39S ribosomal protein L11, mitochondrial	Mrpl11
-0.04669	0.0991009		Q9CQF3	Cleavage and polyadenylation specificity factor subunit 5	Nudt21
-0.539033	1.12155		Q9CQI7;A2CES4;F8VQ88	U2 small nuclear ribonucleoprotein B	Snrpb2	+	+
-0.40316	1.83052	+	Q9CQJ4;A0A087WRE9;A0A087WQQ3;A0A087WP87;O35730-3;O35730-2;O35730	E3 ubiquitin-protein ligase RING2	Rnf2
-0.0101425	0.0173461		Q9CQM8;O09167	60S ribosomal protein L21	Rpl21
1.62891	3.27137	+	Q9CQM9	Glutaredoxin-3	Glrx3
1.31367	4.47886	+	Q9CQN1	Heat shock protein 75 kDa, mitochondrial	Trap1
1.20358	3.13539	+	Q9CQQ7;A0A0G2JGX3	ATP synthase F(0) complex subunit B1, mitochondrial	Atp5f1
0.320245	1.69993	+	Q9CQS2	H/ACA ribonucleoprotein complex subunit 3	Nop10
2.75976	4.64918	+	Q9CQS7;P85965;D3YWP5	Developmental pluripotency-associated protein 5A;Developmental pluripotency-associated protein 5B/5C	Dppa5a;Dppa5b
1.23187	2.9622	+	Q9CQS8;E9PW43	Protein transport protein Sec61 subunit beta	Sec61b;Gm10320
-0.141627	0.2092		Q9CQU1	Microfibrillar-associated protein 1	Mfap1
0.185785	0.153727		Q9CQV8;Q9CQV8-2;A2A5N1	14-3-3 protein beta/alpha;14-3-3 protein beta/alpha, N-terminally processed	Ywhab
0.734345	0.563307		Q9CR11	YEATS domain-containing protein 4	Yeats4
0.748885	2.23248	+	Q9CR16	Peptidyl-prolyl cis-trans isomerase D	Ppid
-0.26862	0.995289		Q9CR47	Ribosome biogenesis protein NSA2 homolog	Nsa2
0.31324	1.54579	+	Q9CR57	60S ribosomal protein L14	Rpl14
-0.25295	1.01727		Q9CRA8	Exosome complex component RRP46	Exosc5
1.04391	3.18449	+	Q9CRB2	H/ACA ribonucleoprotein complex subunit 2	Nhp2
2.03882	3.1013	+	Q9CRC8;D6RFC5;A0A0G2JGC9;F6RDA7;D6RHB1	Leucine-rich repeat-containing protein 40	Lrrc40
-0.719073	2.69097	+	Q9CS00	Cactin	Cactin	+	+
0.988942	3.58266	+	Q9CSH3	Exosome complex exonuclease RRP44	Dis3
-0.225357	1.28286		Q9CSU0-2;Q9CSU0;F6YB25;Q9CSU0-3;F7DAY5	Regulation of nuclear pre-mRNA domain-containing protein 1B	Rprd1b
0.016945	0.0586545		Q9CU62;S4R179	Structural maintenance of chromosomes protein 1A	Smc1a
-1.09353	1.82385	+	Q9CU65;Q3U2E2	Zinc finger MYM-type protein 2;Zinc finger MYM-type protein 5	Zmym2;Zmym5
0.2738	1.91335	+	Q9CW03	Structural maintenance of chromosomes protein 3	Smc3
0.0767825	0.2092		Q9CW46;Q9CW46-2	Ribonucleoprotein PTB-binding 1	Raver1
1.22883	3.74909	+	Q9CWE0;D6RCX5;D3Z0X8;D3YW54;Q9CWE0-2	Mitochondrial fission regulator 1-like	Mtfr1l
0.518095	1.81232	+	Q9CWF2	Tubulin beta-2B chain	Tubb2b
0.15089	0.271837		Q9CWH0	Developmental pluripotency-associated protein 2	Dppa2
1.34631	2.2906	+	Q9CWJ9	Bifunctional purine biosynthesis protein PURH;Phosphoribosylaminoimidazolecarboxamide formyltransferase;IMP cyclohydrolase	Atic
-0.623672	2.79872	+	Q9CWK3	CD2 antigen cytoplasmic tail-binding protein 2	Cd2bp2			+
0.26064	1.19148		Q9CWK8	Sorting nexin-2	Snx2
0.690597	3.05629	+	Q9CWR8;D3YUQ4	DNA (cytosine-5)-methyltransferase 3-like	Dnmt3l
-0.8664	1.91198	+	Q9CWU9	Nucleoporin Nup37	Nup37
0.007975	0.0248972		Q9CWX9;F6QKD2;D3YWF9	Probable ATP-dependent RNA helicase DDX47	Ddx47
0.675772	2.40264	+	Q9CWY6;Q8VC52	RNA-binding protein with multiple splicing 2	Rbpms2
2.29407	3.89761	+	Q9CX11;G3X989;E0CYI7;G3XA22	rRNA-processing protein UTP23 homolog	Utp23
1.38552	1.3066	+	Q9CX34	Suppressor of G2 allele of SKP1 homolog	Sugt1
-1.02343	1.78582	+	Q9CX48;F6QZB1	Zinc finger CCHC domain-containing protein 10	Zcchc10
-0.460913	2.32618	+	Q9CX86	Heterogeneous nuclear ribonucleoprotein A0	Hnrnpa0
2.68246	3.61902	+	Q9CXF4	TBC1 domain family member 15	Tbc1d15
0.379402	0.927649		Q9CXG3;D6RJ77	Peptidyl-prolyl cis-trans isomerase-like 4	Ppil4
0.153282	0.559197		Q9CXS4;F6SS03;Q9CXS4-2	Centromere protein V	Cenpv
1.71512	3.51579	+	Q9CXW3;A0A0A6YY29	Calcyclin-binding protein	Cacybp
-0.627692	2.42148	+	Q9CXY6	Interleukin enhancer-binding factor 2	Ilf2
1.854	3.71455	+	Q9CY27;G3UWE1;Q52L67	Very-long-chain enoyl-CoA reductase	Tecr
0.138093	0.342485		Q9CY58-3;Q9CY58-2;Q9CY58;Q9CY58-4	Plasminogen activator inhibitor 1 RNA-binding protein	Serbp1
1.1276	2.36418	+	Q9CY94	DNA replication complex GINS protein PSF3	Gins3
-0.0662375	0.215929		Q9CYA6;A0A0G2JGW3	Zinc finger CCHC domain-containing protein 8	Zcchc8	+	+
0.40349	0.410857		Q9CYG7-2;Q9CYG7	Mitochondrial import receptor subunit TOM34	Tomm34
-0.369453	1.91967	+	Q9CYH6	Ribosome biogenesis regulatory protein homolog	Rrs1
0.101748	0.296694		Q9CYI4;Q9CYI4-2;D3Z765;D3YZ82;D6REI1;D6RGP6	Putative RNA-binding protein Luc7-like 1	Luc7l
0.112485	0.378423		Q9CYX7	RRP15-like protein	Rrp15
-1.16147	2.83189	+	Q9CZ91	Serum response factor-binding protein 1	Srfbp1
0.0862775	0.085874		Q9CZ92;Q9CZ92-2	Centromere protein P	Cenpp
-0.835522	0.927469		Q9CZG9	PDZ domain-containing protein 11	Pdzd11
-0.393058	1.82465	+	Q9CZI9-2;Q9CZI9;D3Z516	Apoptosis-enhancing nuclease	Aen
0.46711	2.24388	+	Q9CZJ1	Probable U3 small nucleolar RNA-associated protein 11	Utp11l
-1.37763	2.50088	+	Q9CZP3		Zfp655
0.20635	0.771785		Q9CZT6	Protein CMSS1	Cmss1
-0.54653	2.9184	+	Q9CZU3	Superkiller viralicidic activity 2-like 2	Skiv2l2	+	+
0.78415	2.13824	+	Q9CZW5	Mitochondrial import receptor subunit TOM70	Tomm70a
-0.10946	0.332916		Q9CZX0;Q9CZX0-2	Elongator complex protein 3	Elp3
-0.841607	2.81455	+	Q9CZX5	PIN2/TERF1-interacting telomerase inhibitor 1	Pinx1
0.188998	0.746614		Q9CZX8;D3YUT3;D3Z5R8;D3Z722;D3YUG3;S4R223	40S ribosomal protein S19	Rps19
0.21479	0.685106		Q9D051	Pyruvate dehydrogenase E1 component subunit beta, mitochondrial	Pdhb
0.056565	0.198697		Q9D0B0;F6RTE1	Serine/arginine-rich splicing factor 9	Srsf9
1.44293	3.53299	+	Q9D0D4	Probable dimethyladenosine transferase	Dimt1
0.082925	0.155328		Q9D0D5	General transcription factor IIE subunit 1	Gtf2e1
-0.256673	1.33209	+	Q9D0E1-2;Q9D0E1;B8JK33;B8JK32;F6W322;F7C9U3;G3X924;Q91VC4	Heterogeneous nuclear ribonucleoprotein M	Hnrnpm	+	+
0.238357	1.23488		Q9D0F6;D3Z1Y6	Replication factor C subunit 5	Rfc5
0.051445	0.168386		Q9D0I8;A2AMV1;D6RCI7	mRNA turnover protein 4 homolog	Mrto4
0.611223	2.0427	+	Q9D0I9	Arginine--tRNA ligase, cytoplasmic	Rars
-0.492635	2.2425	+	Q9D0M0	Exosome complex exonuclease RRP42	Exosc7
1.17593	2.59943	+	Q9D0M2;A2AR39	Cell division cycle-associated protein 7	Cdca7
0.8412	3.71455	+	Q9D0M3-2;Q9D0M3	Cytochrome c1, heme protein, mitochondrial	Cyc1
0.550805	1.26868		Q9D0N7;D3Z616;D3YTP6	Chromatin assembly factor 1 subunit B	Chaf1b
0.490808	2.59624	+	Q9D0P7;A2AEE4;A2AEF3	Proline/serine-rich coiled-coil protein 1	Psrc1
0.297818	1.73546	+	Q9D0R4;Q5SVX2	Probable ATP-dependent RNA helicase DDX56	Ddx56
0.235187	1.09277		Q9D0T1;E9PZS4	NHP2-like protein 1;NHP2-like protein 1, N-terminally processed	Nhp2l1		+
-0.0024175	0.00395836		Q9D0W5	Peptidyl-prolyl cis-trans isomerase-like 1	Ppil1	+	+
-0.2249	0.161686		Q9D198	Pre-mRNA-splicing factor SYF2	Syf2	+	+
0.51214	0.938944		Q9D1A2	Cytosolic non-specific dipeptidase	Cndp2
1.98537	3.86534	+	Q9D1C1;A2A4Z1	Ubiquitin-conjugating enzyme E2 C	Ube2c
0.174615	1.06475		Q9D1C9;E9QAX0;E9PYF0;F6VVA3	Ribosomal RNA-processing protein 7 homolog A	Rrp7a
0.770405	1.62725	+	Q9D1I6	39S ribosomal protein L14, mitochondrial	Mrpl14
-0.375717	1.21032		Q9D1M1		Polr1d
-0.44398	0.8407		Q9D1Q1	M-phase phosphoprotein 6	Mphosph6
0.238985	0.470167		Q9D1R9;A0A0G2JGY8;A0A0G2JEY6;D3YWC0	60S ribosomal protein L34	Rpl34
-0.197265	0.454853		Q9D287;D6RGA5;D6RHR7	Pre-mRNA-splicing factor SPF27	Bcas2		+
-1.23893	4.51453	+	Q9D2D7;Q9D2D7-3;Q9D2D7-2	Zinc finger protein 687	Znf687
0.44161	1.15917		Q9D2U9;Q8CGP0	Histone H2B type 3-A;Histone H2B type 3-B	Hist3h2ba;Hist3h2bb
-0.370748	2.23928	+	Q9D4G5;Q8K205		Pop1
-0.117638	0.318033		Q9D4H9-2;G5E8S0;Q9D4H9-3;Q9D4H9	PHD finger protein 14	Phf14
-0.338413	2.08141	+	Q9D554	Splicing factor 3A subunit 3	Sf3a3	+	+
0.195535	0.851759		Q9D666-3;Q9D666;Q9D666-4;D3Z0V9;Q9D666-2;Q3TSM1;F6XYA0;F7BX07;D3Z5Q2;D3Z3N5;D3Z1X3;D3YUW9	SUN domain-containing protein 1	Sun1
0.131335	0.104869		Q9D6L8;A0A087WPZ6;A0A087WP41;Q9D6L8-2	Peptidyl-prolyl cis-trans isomerase-like 3	Ppil3	+	+
0.754895	2.58064	+	Q9D6T0;Q9D6T0-2;D3YV75	Nitric oxide synthase-interacting protein	Nosip
0.389172	2.50088	+	Q9D6Z1;E0CXZ0;A2APD7;F7CHQ7;F6USW7;F6U250;F6V095;F7CHP9	Nucleolar protein 56	Nop56
0.709283	0.585372		Q9D720;F6VZ99	Non-structural maintenance of chromosomes element 1 homolog	Nsmce1
0.12336	0.296694		Q9D753;D3YYN3;F6SGT4	Exosome complex component RRP43	Exosc8
1.81055	3.1291	+	Q9D7M8	DNA-directed RNA polymerase II subunit RPB4	Polr2d
0.771628	2.80788	+	Q9D7S7-2;Q9D7S7	60S ribosomal protein L22-like 1	Rpl22l1
0.015725	0.0562029		Q9D7Z3;Q9D7Z3-2	Nucleolar protein 7	Nol7
1.10619	4.29478	+	Q9D880	Mitochondrial import inner membrane translocase subunit TIM50	Timm50			+
0.62705	1.78065	+	Q9D881;P19536	Cytochrome c oxidase subunit 5B, mitochondrial	Cox5b
-1.42729	1.43056	+	Q9D883;G3UW94;E9PWX6;E9PWM2;E9Q809;F8WH71;E9Q5Y2;E9PUZ3;E9Q1I7;E9Q5J3;Q8BGJ9-4;Q8BGJ9-2;Q8BGJ9;Q8BGJ9-3	Splicing factor U2AF 35 kDa subunit;Splicing factor U2AF 26 kDa subunit	U2af1;U2af1l4		+	+
0.868633	1.45353	+	Q9D892	Inosine triphosphate pyrophosphatase	Itpa
0.342245	2.12181	+	Q9D8E6	60S ribosomal protein L4	Rpl4
-0.120245	0.459484		Q9D8M4	60S ribosomal protein L7-like 1	Rpl7l1
1.20148	4.64437	+	Q9D8N0	Elongation factor 1-gamma	Eef1g
0.18653	0.770213		Q9D8S5;O35326;S4R2G3	Serine/arginine-rich splicing factor 5	Srsf5			+
2.12671	2.49117	+	Q9D8U8	Sorting nexin-5	Snx5
-0.97285	1.14598		Q9D8Y8-3;Q9D8Y8-2;Q9D8Y8	Inhibitor of growth protein 5	Ing5
0.828845	2.21694	+	Q9D902;A0A087WSE8	General transcription factor IIE subunit 2	Gtf2e2
-0.283025	1.37813	+	Q9D903;A2ACZ1	Probable rRNA-processing protein EBP2	Ebna1bp2
-0.941385	2.31708	+	Q9DAA6;Q9DAA6-2	Exosome complex component CSL4	Exosc1
-0.524502	2.77527	+	Q9DAE2		Rbmxl2
0.510983	2.11598	+	Q9DAR7;Q3TBW9;D6RFQ0	m7GpppX diphosphatase	Dcps
-0.563573	2.74413	+	Q9DAW6	U4/U6 small nuclear ribonucleoprotein Prp4	Prpf4		+	+
0.926397	2.98948	+	Q9DB20;F6XVM5;F7D3P8	ATP synthase subunit O, mitochondrial	Atp5o
-0.272128	0.191967		Q9DB42	Zinc finger protein 593	Znf593
0.0209975	0.0355711		Q9DB77	Cytochrome b-c1 complex subunit 2, mitochondrial	Uqcrc2
-0.386235	1.58627	+	Q9DB96	Neuroguidin	Ngdn
0.177443	0.379015		Q9DBC3;E0CXC2;G3UZ59	Cap-specific mRNA (nucleoside-2-O-)-methyltransferase 1	Cmtr1
-0.046245	0.0491785		Q9DBD5;Q9D4T3	Proline-, glutamic acid- and leucine-rich protein 1	Pelp1
-0.37411	1.56299	+	Q9DBE9	pre-rRNA processing protein FTSJ3	Ftsj3
-2.50432	3.88847	+	Q9DBF7-3;Q9DBF7;A2A6F5	Pre-mRNA-splicing factor CWC25 homolog	Cwc25
-0.72208	1.19761		Q9DBH0;Q8BZZ3	NEDD4-like E3 ubiquitin-protein ligase WWP2;NEDD4-like E3 ubiquitin-protein ligase WWP1	Wwp2;Wwp1
0.412973	2.14334	+	Q9DBJ1;O70250	Phosphoglycerate mutase 1	Pgam1
-0.528062	0.400067		Q9DBR0	A-kinase anchor protein 8	Akap8
-0.259805	1.65931	+	Q9DBR1-2;Q9DBR1	5-3 exoribonuclease 2	Xrn2
-2.46143	2.42369	+	Q9DBR7-2;Q9DBR7;A6H644;Q8BG95	Protein phosphatase 1 regulatory subunit 12A	Ppp1r12a
-0.543425	2.40464	+	Q9DBY8	Nuclear valosin-containing protein-like	Nvl
2.00577	4.68203	+	Q9DBZ5;Q9DBZ5-2	Eukaryotic translation initiation factor 3 subunit K	Eif3k
-0.755678	2.20994	+	Q9DC33;Q9DC33-2;Q9DC33-3	High mobility group protein 20A	Hmg20a
-0.544752	2.61879	+	Q9DC48	Pre-mRNA-processing factor 17	Cdc40	+	+
-0.299325	1.43332	+	Q9DCA5;F6WEP7;E9Q2V8;F6QAG4	Ribosome biogenesis protein BRX1 homolog	Brix1
-0.33656	0.594219		Q9DCC5;P23198;D3Z1A9;D3Z313	Chromobox protein homolog 3	Cbx3
-0.756395	1.59647	+	Q9DCD2;F6TM12;E0CYF8	Pre-mRNA-splicing factor SYF1	Xab2	+	+
-0.04764	0.0724802		Q9DCE5	p21-activated protein kinase-interacting protein 1	Pak1ip1
1.43559	3.3014	+	Q9DCH4	Eukaryotic translation initiation factor 3 subunit F	Eif3f
0.177597	0.340998		Q9DCJ5	NADH dehydrogenase [ubiquinone] 1 alpha subcomplex subunit 8	Ndufa8
0.96325	4.15478	+	Q9DCL9;D3Z6P1;D6RCU8	Multifunctional protein ADE2;Phosphoribosylaminoimidazole-succinocarboxamide synthase;Phosphoribosylaminoimidazole carboxylase	Paics
0.997803	3.11472	+	Q9DCT5	Stromal cell-derived factor 2	Sdf2
-0.63509	0.567718		Q9DCW4	Electron transfer flavoprotein subunit beta	Etfb
-0.245383	0.706605		Q9EP71	Ankycorbin	Rai14
0.731635	2.54075	+	Q9EP97;F6Z9L5	Sentrin-specific protease 3	Senp3
2.86498	4.96857	+	Q9EPL8	Importin-7	Ipo7
-1.02234	3.43053	+	Q9EPQ8-2;Q9EPQ8	Transcription factor 20	Tcf20
0.75192	2.81819	+	Q9EPU0-2;Q9EPU0	Regulator of nonsense transcripts 1	Upf1
-0.81305	3.38893	+	Q9EPU4	Cleavage and polyadenylation specificity factor subunit 1	Cpsf1
0.548695	1.17484		Q9EQQ0;E0CZC9;Q8K085;F6WB49	Histone-lysine N-methyltransferase SUV39H2	Suv39h2
-0.22379	1.35327	+	Q9ERG0;Q9ERG0-2;Q4U4S6;Q8BGB5	LIM domain and actin-binding protein 1	Lima1
-0.398188	0.551397		Q9ERS2	NADH dehydrogenase [ubiquinone] 1 alpha subcomplex subunit 13	Ndufa13
-1.17434	4.74102	+	Q9ERU9	E3 SUMO-protein ligase RanBP2	Ranbp2
1.25673	3.01214	+	Q9ES00;G3UZD6;H7BXC2;G3UZM6	Ubiquitin conjugation factor E4 B	Ube4b
0.596985	1.79453	+	Q9ESW4	Acylglycerol kinase, mitochondrial	Agk
0.05024	0.226011		Q9ESX5;B7ZCL7;F6YUI5;F6S1S5	H/ACA ribonucleoprotein complex subunit 4	Dkc1
0.286475	1.45762	+	Q9JHJ0	Tropomodulin-3	Tmod3
-2.89367	3.33837	+	Q9JHS9	Spliceosome-associated protein CWC15 homolog	Cwc15	+	+
0.76921	3.55507	+	Q9JHU4;F6ZX84	Cytoplasmic dynein 1 heavy chain 1	Dync1h1
0.126067	0.628051		Q9JI13;Q9JI13-2	Something about silencing protein 10	Utp3
-0.376225	2.39091	+	Q9JI44;Q9JI44-2	DNA methyltransferase 1-associated protein 1	Dmap1
-0.83189	2.18576	+	Q9JIH2	Nuclear pore complex protein Nup50	Nup50
-0.441947	2.32668	+	Q9JIK5	Nucleolar RNA helicase 2	Ddx21
0.270795	0.863837		Q9JIX0	Transcription and mRNA export factor ENY2	Eny2
-0.738748	2.66882	+	Q9JIX8-4;Q9JIX8;F6RJ39;B8JJ91;Q9JIX8-3;Q9JIX8-2;B8JJ92;Q52KR6;B8JJ90;F6Q8C0;B8JJ89	Apoptotic chromatin condensation inducer in the nucleus	Acin1			+
0.47252	1.97076	+	Q9JJ28	Protein flightless-1 homolog	Flii
-0.094395	0.141609		Q9JJ66;V9GXW0	Cell division cycle protein 20 homolog	Cdc20
-0.585808	2.95476	+	Q9JJ89	Coiled-coil domain-containing protein 86	Ccdc86
-0.0076775	0.0220242		Q9JJA4;D3Z369	Ribosome biogenesis protein WDR12	Wdr12
-0.508273	0.990989		Q9JJF3	Bifunctional lysine-specific demethylase and histidyl-hydroxylase NO66	No66
0.269298	0.794944		Q9JJI8	60S ribosomal protein L38	Rpl38
0.460275	2.64171	+	Q9JJT0	RNA 3-terminal phosphate cyclase-like protein	Rcl1
0.518567	2.68686	+	Q9JK30-2;Q9JK30;A2AT40	Origin recognition complex subunit 3	Orc3
0.585213	1.48291	+	Q9JKB1;P58321	Ubiquitin carboxyl-terminal hydrolase isozyme L3;Ubiquitin carboxyl-terminal hydrolase isozyme L4	Uchl3;Uchl4
0.697403	3.71455	+	Q9JKF1;Q3UQ44	Ras GTPase-activating-like protein IQGAP1	Iqgap1
0.85881	1.24381		Q9JKR6;E0CYZ2;F6TRP3	Hypoxia up-regulated protein 1	Hyou1
0.0048975	0.0148897		Q9JKX4;Q9JKX4-2;Q9JKX4-3	Protein AATF	Aatf
-0.879147	1.03266		Q9JLV1	BAG family molecular chaperone regulator 3	Bag3
0.0546675	0.152662		Q9JLZ6;Q9JLZ6-2	Hypermethylated in cancer 2 protein	Hic2
0.0151925	0.0444295		Q9JM76;A0A0G2JFK7;D3Z2F7;D3Z2F8;H7BWZ3	Actin-related protein 2/3 complex subunit 3	Arpc3
-0.594008	0.956872		Q9JMK2	Casein kinase I isoform epsilon	Csnk1e
1.12141	1.73842	+	Q9QWF0	Chromatin assembly factor 1 subunit A	Chaf1a
-1.06364	0.811285		Q9QWT9;Q9QWT9-3;Q9QWT9-2;G3UXN2	Kinesin-like protein KIFC1	Kifc1
1.99398	2.66818	+	Q9QXB9	Developmentally-regulated GTP-binding protein 2	Drg2
-0.522473	1.70193	+	Q9QXK7	Cleavage and polyadenylation specificity factor subunit 3	Cpsf3
-0.52644	3.23813	+	Q9QXS1-3	Plectin	Plec
1.44881	3.51676	+	Q9QXX4;A0A0G2JGT3;Q8BH59	Calcium-binding mitochondrial carrier protein Aralar2	Slc25a13
0.551678	2.0724	+	Q9QYJ0	DnaJ homolog subfamily A member 2	Dnaja2
0.135472	0.158327		Q9QYL7	Activator of basal transcription 1	Abt1
1.35075	3.72061	+	Q9QYS9-8;Q9QYS9-4;Q9QYS9-3;Q9QYS9-6;Q9QYS9-2;Q9QYS9;Q9QYS9-7;Q9QYS9-5	Protein quaking	Qki
-0.62321	1.87237	+	Q9QZ67;B1B0B1	Protein phosphatase 1D	Ppm1d
0.790015	1.21398		Q9QZD9	Eukaryotic translation initiation factor 3 subunit I	Eif3i
-0.0149825	0.0326691		Q9QZQ8;Q9QZQ8-2	Core histone macro-H2A.1	H2afy
1.21151	3.19569	+	Q9R061	Cytosolic Fe-S cluster assembly factor NUBP2	Nubp2
-0.369375	1.68307	+	Q9R0L6;Q9R0L6-2	Pericentriolar material 1 protein	Pcm1
0.6387	2.2425	+	Q9R0Q4;A2AEB5;A2AEB4;A2AEB3;A2AEB8;A2AEB7;A2AEB6	Mortality factor 4-like protein 2	Morf4l2
-0.170797	1.08865		Q9R190	Metastasis-associated protein MTA2	Mta2
0.145492	0.696284		Q9R1C7;Q9R1C7-2;A2AQW6;E9QMI6;D3Z4N6;E9QP07;Q80W14-2;Q80W14;Q80W14-3	Pre-mRNA-processing factor 40 homolog A	Prpf40a			+
1.09604	2.51525	+	Q9R1X4-6;Q9R1X4-2;Q9R1X4;Q9R1X4-4;Q9R1X4-5;Q9R1X4-3;H7BX89	Protein timeless homolog	Timeless
-0.457022	1.54079	+	Q9R226	KH domain-containing, RNA-binding, signal transduction-associated protein 3	Khdrbs3
0.476627	1.97578	+	Q9WTI7;Q9WTI7-4;Q9WTI7-3;Q5ND45	Unconventional myosin-Ic	Myo1c
-0.102453	0.334092		Q9WTM5;D3YXQ8	RuvB-like 2	Ruvbl2
-0.0493325	0.202404		Q9WTX5;E9PUV4	S-phase kinase-associated protein 1	Skp1
0.120648	0.198697		Q9WTX8;Q9WTX8-2	Mitotic spindle assembly checkpoint protein MAD1	Mad1l1
-0.229935	1.25685		Q9WU62-2;Q9WU62	Inner centromere protein	Incenp
1.10062	4.35579	+	Q9WU78;Q9WU78-3;Q9WU78-2	Programmed cell death 6-interacting protein	Pdcd6ip
1.25201	4.74102	+	Q9WUA2;A0A087WS80;A0A087WQ15	Phenylalanine--tRNA ligase beta subunit	Farsb
0.174695	0.950049		Q9WUK4	Replication factor C subunit 2	Rfc2
0.639003	0.355378		Q9WUM3;G3UYK8;B9EIZ7;Q920M5-3;O89053;Q920M5-2;Q920M5;Q920M5-4	Coronin-1B;Coronin;Coronin-6;Coronin-1A	Coro1b;Coro1a;Coro6
0.536473	1.64795	+	Q9WUM4;E9PX03;E9PZJ0;E9PVJ1	Coronin-1C	Coro1c
0.67945	2.81455	+	Q9WUP7-2;Q9WUP7;A0A087WRL3;A0A087WP81	Ubiquitin carboxyl-terminal hydrolase isozyme L5	Uchl5
1.26841	4.54052	+	Q9WUR9;F6TEU8;A2ARF6;A2ARF5	Adenylate kinase 4, mitochondrial	Ak4
-0.317568	1.50991	+	Q9WUU9	Germinal-center associated nuclear protein	Mcm3ap
-0.956005	0.975217		Q9WV02;A2AFI3;Q9WV02-2;S4R1F6;A2AFI4	RNA-binding motif protein, X chromosome;RNA-binding motif protein, X chromosome, N-terminally processed	Rbmx	+	+
1.48849	1.41136	+	Q9WV55	Vesicle-associated membrane protein-associated protein A	Vapa
-0.209005	1.07113		Q9WV70	Nucleolar complex protein 2 homolog	Noc2l
-0.151952	0.379015		Q9WVA3	Mitotic checkpoint protein BUB3	Bub3
0.237285	0.995654		Q9WVB0;S4R1Y2;T1ECW4;Q9WVB0-2;S4R1A1;S4R2P3	RNA-binding protein with multiple splicing	Rbpms
0.897802	3.93411	+	Q9WVK4;Q8BH64	EH domain-containing protein 1	Ehd1
-0.723503	1.82465	+	Q9WVM1;E9Q9N9;E9Q851;E9Q1Y6;E9Q071;F6WD40	Rac GTPase-activating protein 1	Racgap1
0.347085	1.13694		Q9Z0G0	PDZ domain-containing protein GIPC1	Gipc1
0.138098	0.519297		Q9Z0H1	WD repeat-containing protein 46	Wdr46
-0.620505	2.59927	+	Q9Z0H3-2;Q9Z0H3;F6U415;D6RDC4	SWI/SNF-related matrix-associated actin-dependent regulator of chromatin subfamily B member 1	Smarcb1
0.4863	1.86918	+	Q9Z0N1;A2AAW9	Eukaryotic translation initiation factor 2 subunit 3, X-linked	Eif2s3x
0.280512	0.454924		Q9Z0N2	Eukaryotic translation initiation factor 2 subunit 3, Y-linked	Eif2s3y
-0.96526	3.78646	+	Q9Z0U1;Q921G9;Q9QXY1	Tight junction protein ZO-2	Tjp2
-0.681253	3.55995	+	Q9Z0W3;Q9Z0W3-2	Nuclear pore complex protein Nup160	Nup160
0.723615	1.95568	+	Q9Z0Z7;Q8BPQ2;E9QNP6;O08584;Q99JB0;P46099	Krueppel-like factor 5	Klf5
0.824972	0.622868		Q9Z1F9;H3BJQ2	SUMO-activating enzyme subunit 2	Uba2
-0.356092	0.866235		Q9Z1M8	Protein Red	Ik
0.25723	1.38433	+	Q9Z1N2	Origin recognition complex subunit 1	Orc1
2.21585	1.92423	+	Q9Z1N5;G3UXI6	Spliceosome RNA helicase Ddx39b	Ddx39b		+	+
0.70251	2.67941	+	Q9Z1Q9;G3UY93;G3UZ22;G3UYW2	Valine--tRNA ligase	Vars
-0.51962	2.63617	+	Q9Z1X4-3;Q9Z1X4-2;Q9Z1X4;Q45VK5	Interleukin enhancer-binding factor 3	Ilf3
-0.560623	3.32953	+	Q9Z204-2;Q9Z204-4;Q9Z204-3	Heterogeneous nuclear ribonucleoproteins C1/C2	Hnrnpc	+	+
-0.056635	0.311141		Q9Z277;Q9Z277-2	Tyrosine-protein kinase BAZ1B	Baz1b
0.381808	1.56826	+	Q9Z2D6-2;D3Z7U4	Methyl-CpG-binding protein 2	Mecp2
1.77611	1.21032		Q9Z2D8;D3YTR5;Q9Z2D8-2;F6WZH1	Methyl-CpG-binding domain protein 3	Mbd3
0.140302	0.574885		Q9Z2E1;Q9Z2E1-2;F6UPR7	Methyl-CpG-binding domain protein 2	Mbd2
-0.11583	0.343416		Q9Z2N8;A0A0A6YWG8;D3YVN1;A0A0A6YWR1;A0A0A6YW15;F8WI57;Q99MR0	Actin-like protein 6A	Actl6a
1.6682	4.11023	+	Q9Z2U1;A0A0G2JF97;D3YX79	Proteasome subunit alpha type-5;Proteasome subunit alpha type	Psma5;Gm8394
-0.0025225	0.00755798		Q9Z2X1;Q9Z2X1-2;J3QM80;J3QMT0;J3QP45;J3QNH2;J3QMV8	Heterogeneous nuclear ribonucleoprotein F;Heterogeneous nuclear ribonucleoprotein F, N-terminally processed	Hnrnpf	+	+
-1.09894	3.58266	+	Q9Z315	U4/U6.U5 tri-snRNP-associated protein 1	Sart1	+	+
-0.00203	0.00193999		S4R1B9;D3YZK4;Q80UV9-3;Q80UV9;A0A067XG50;Q80UV9-2	Transcription initiation factor TFIID subunit 1	Taf1
-1.33981	2.0666	+	S4R1E5;Q76LV0;O70325-2;O70325;Q91XR9	Glutathione peroxidase;Phospholipid hydroperoxide glutathione peroxidase, mitochondrial;Phospholipid hydroperoxide glutathione peroxidase, nuclear	Gpx4
1.21139	3.03354	+	S4R1L5;S4R2P8;O88738-3;O88738-2;O88738;S4R268;S4R1S3	Baculoviral IAP repeat-containing protein 6	Birc6
-1.28072	4.60587	+	S4R1M2;D3YXK2	Scaffold attachment factor B1	Safb
0.513262	1.99589	+	S4R257;S4R1W1;A0A0A0MQF6;P16858;D3YYI5;S4R2G5;Q64467	Glyceraldehyde-3-phosphate dehydrogenase	Gapdh;Gm3839;Gm7293
0.146555	0.169148		S4R2R0;Q8C5I2;Q91YN8;Q9JIB4	General transcription factor IIH subunit 2	Gtf2h2
-0.545968	2.1371	+	V9GXJ9;F6WIU1;Q8VDQ9	Protein KRI1 homolog	Kri1
0.17696	0.498377		Z4YJT3;Q6ZQ58;Q6ZQ58-2	La-related protein 1	Larp1
-0.352413	0.910876		Z4YJV4;Q60597-2;Q60597;Q60597-4;Q60597-3;Q5SVY1;Q5SVY0;E9Q7L0	2-oxoglutarate dehydrogenase, mitochondrial	Ogdh
-0.652632	1.4124	+	Z4YJZ7;Q5DW34-2;Q5DW34-3;Q5DW34;E9Q5A3;Q8BRN2;A2AIS5;A0A0A6YWA0;A0A0G2JFI9;A0A0A6YXD1;F6WWY8	Histone-lysine N-methyltransferase EHMT1	Ehmt1
-0.437063	1.94849	+	Z4YKB8;Q3TEA8-2;Q3TEA8;Z4YKA3;Q3TEA8-3;A2AM65;A2AM69;A2AM70;A2AM63	Heterochromatin protein 1-binding protein 3	Hp1bp3
-0.33607	0.611575		Z4YKQ9;Q4QY64;Q4QY64-2	ATPase family AAA domain-containing protein 5	Atad5
0.785175	2.2748	+	Z4YKT6;Q99J47-2;Q99J47	Dehydrogenase/reductase SDR family member 7B	Dhrs7b
1.63652	1.97076	+	Z4YL78;K3W4R5;A2AGT5-2;A2AGT5-3;A2AGT5	Cytoskeleton-associated protein 5	Ckap5
