# Supplementary material for: Transcriptional repression by FACT is linked to regulation of chromatin accessibility at the promoter of ES cells
Source: Life Sci Alliance. 2018 Jun 13;1(3):e201800085. doi: 10.26508/lsa.201800085 (PMC6238418; doi:10.26508/lsa.201800085)
Supplement: Supplementary file 7 [file LSA-2018-00085_TableS7.xlsx]

## Sheet: Sheet1
Symbol	Transcript	DNA sequence (5'-3')
Snord49a	snoRNA	AGTCAGCCAGGAGCAGTTATCGTCAGTTATCGAC
Rn45s	rRNA	GAGAGCCGCCCGAACGACCGACTTCCCTACGGGCCC
Snord65	snoRNA	CTTCAGAAAACCATAGGCTCACCACTACCAATCT
Snord82	snoRNA	GAACCATGGGGTTGAAATGAAATATGCTGATGTGCT
Snord49b	snoRNA	GTCAGCTAACTAGGGATGTCGTCAGTTGTCGCAT
Snord2	snoRNA	AGTGATCAGCAAGAGTATTCTCTTCATTTCAGGTCA
Snord99	snoRNA	TCTCAGTCCCATATCCGCATTTCTCATCCATAGA
Snord95	snoRNA	CAGCTCAGAAACAGCCTCTGGATTTCAGCAAAGCAA
Snord55	snoRNA	CGTGGGGAAGCCAACCTTGGAGAGCTGAGCGTGC
Snord68	snoRNA	CATCAGATGGAAAAGGGTTCAAAAGTACTTTCAT
Snord32a	snoRNA	GACTGTGAGATCAACCCATGCACCGCTCTGAGACTC
Snord87	snoRNA	GTTTCTTTGAAGAGAGAATCTTAAAAGACTGAGA
Rmrp	ncRNA	CGCACCAACCACACGGGGCTCATTCTCAGCGCGGCTAC
Snord100	snoRNA	CTCGCTGAGGAAACTGCACGTCACCCTCCTGAAA
Snora68	snoRNA	GTGCAGTGCCCCCCAGAGTGAATCAGTAGGCTCTACAGAA
Rnu3a	snRNA	AACCACTCAGACTGTGTCCTCTCCCTCTCAACCCTCAA
Snord42b	snoRNA	GAGACCTGTGATGTCTTCAAAGGAACCACTGATG
Snord83b	snoRNA	TGAGGAATTATTCCCTGTTGCCTTCCTTCTGAGA
Snord110	snoRNA	TTGCTCAGACACATGGAGTCGTCAGTGATCTCTCAGGG
Snord47	snoRNA	CCTCAGAAATAAAATGGAACGGTTTAAAGGTGAT
